# Supplementary material for: Genomic Analysis of Multidrug-Resistant Mycobacterium tuberculosis Strains From Patients in Kazakhstan
Source: Front Genet. 2021 Nov 9;12:683515. doi: 10.3389/fgene.2021.683515 (PMC8630622; doi:10.3389/fgene.2021.683515)
Supplement: Supplementary file 7 [file Table5.XLSX]

## Sheet: 1280_snp
Supplementary Material
Genomic analysis of multidrug resistant Mycobacterium tuberculosis strains from patients in Kazakhstan
Supplementary file S5 – List of genetic variants (SNPs and Indels) filtered by GMTV database.
2_1280.vcf
SNP ID	Position in genome	Position in gene	Ref	Alt	# of samples	Locus tag	Gene	Codon	Codon Number	Amin acid	Effect	Genome Region
	803029	501	A	G	0	Rv0704	rplB	AAG/GAG	168	NULL	Nonsyn	Coding region
	1094034	322	A	T	0	Rv0978c	PE_PGRS17	GTT/GAT	108	NULL	Nonsyn	Coding region
	1094056	300	G	T	0	Rv0978c	PE_PGRS17	CTC/ATC	101	NULL	Nonsyn	Coding region
	1213401	1841	C	G	0	Rv1087	PE_PGRS21	GGC/GGG	614	NULL	Syn	Coding region
	1213402	1842	G	C	0	Rv1087	PE_PGRS21	GGG/CGG	615	NULL	Nonsyn	Coding region
	1407518	179	G	A	0	Rv1259	udgB	CCG/CCA	60	NULL	Syn	Coding region
	3574869	2167	G	A	0	Rv3201c		ACG/ATG	723	NULL	Nonsyn	Coding region
	3817651	412	G	A	0	Rv3400		CGG/CAG	138	NULL	Nonsyn	Coding region
	4292759	415	T	C	0	Rv3824c	papA1	CAC/CGC	139	NULL	Nonsyn	Coding region
mtbs0001849_A	1849	1849	C	A	816
mtbs0001977_G	1977	1977	A	G	1854
mtbs0004013_C	4013	734	T	C	1870	Rv0003	recF	ATC/ACC	245	I/T	Nonsyn	Coding region
mtbs0007362_C	7362	61	G	C	1917	Rv0006	gyrA	GAG/CAG	21	E/Q	Nonsyn	Coding region
mtbs0007585_C	7585	284	G	C	1808	Rv0006	gyrA	AGC/ACC	95	S/T	Nonsyn	Coding region
mtbs0009304_A	9304	2003	G	A	1841	Rv0006	gyrA	GGC/GAC	668	G/D	Nonsyn	Coding region
mtbs0011820_G	11820	11820	C	G	735
mtbs0011879_G	11879	433	A	G	2032	Rv0008c		TCC/CCC	145	S/P	Nonsyn	Coding region
mtbs0014785_C	14785	697	T	C	1895	Rv0012		TGC/CGC	233	C/R	Nonsyn	Coding region
mtbs0014861_T	14861	773	G	T	757	Rv0012		GGC/GTC	258	G/V	Nonsyn	Coding region
mtbs0015117_G	15117	204	C	G	974	Rv0013	trpG	ATC/ATG	68	I/M	Nonsyn	Coding region
mtbs0016119_A	16119	1352	C	A	757	Rv0014c	pknB	CGC/CTC	451	R/L	Nonsyn	Coding region
mtbs0017654_G	17654	1109	T	G	805	Rv0015c	pknA	CAG/CCG	370	Q/P	Nonsyn	Coding region
mtbs0017657_C	17657	1106	T	C	808	Rv0015c	pknA	CAG/CGG	369	Q/R	Nonsyn	Coding region
mtbs0021795_A	21795	1387	G	A	2248	Rv0018c	pstP	CCG/TCG	463	P/S	Nonsyn	Coding region
mtbs0025610_C	25610	25610	G	C	742
mtbs0026959_G	26959	26959	C	G	1968
mtbs0034044_C	34044	34044	T	C	1849
mtbs0035608_T	35608	1314	C	T	754	Rv0032	bioF2	GCC/GCT	438	A/A	Syn	Coding region
mtbs0036008_C	36008	1714	G	C	811	Rv0032	bioF2	GAC/CAC	572	D/H	Nonsyn	Coding region
mtbs0037031_G	37031	165	C	G	1912	Rv0034		GCC/GCG	55	A/A	Syn	Coding region
mtbs0037305_G	37305	47	C	G	769	Rv0035	fadD34	TCG/TGG	16	S/W	Nonsyn	Coding region
mtbs0037334_T	37334	76	A	T	749	Rv0035	fadD34	ACT/TCT	26	T/S	Nonsyn	Coding region
mtbs0039158_G	39158	672	C	G	846	Rv0036c		CGG/CGC	224	R/R	Syn	Coding region
mtbs0042281_A	42281	71	C	A	1073	Rv0039c		TGC/TTC	24	C/F	Nonsyn	Coding region
mtbs0042967_C	42967	399	G	C	2040	Rv0040c	mtc28	CCC/CCG	133	P/P	Syn	Coding region
mtbs0044768_G	44768	1207	A	G	770	Rv0041	leuS	AGG/GGG	403	R/G	Nonsyn	Coding region
mtbs0046324_C	46324	2763	T	C	65	Rv0041	leuS	CGT/CGC	921	R/R	Syn	Coding region
mtbs0048503_C	48503	525	T	C	777	Rv0044c		CGA/CGG	175	R/R	Syn	Coding region
mtbs0049360_T	49360	580	C	T	876	Rv0045c		GTC/ATC	194	V/I	Nonsyn	Coding region
mtbs0050557_C	50557	568	T	C	1255	Rv0046c	ino1	AGG/GGG	190	R/G	Nonsyn	Coding region
mtbs0051949_G	51949	749	A	G	1223	Rv0048c		GTC/GCC	250	V/A	Nonsyn	Coding region
mtbs0054394_G	54394	732	A	G	1254	Rv0050	ponA1	GCA/GCG	244	A/A	Syn	Coding region
mtbs0062049_G	62049	1654	A	G	2156	Rv0058	dnaB	AGG/GGG	552	R/G	Nonsyn	Coding region
mtbs0063146_T	63146	63146	G	T	724
mtbs0065150_T	65150	201	C	T	757	Rv0061c		TGG/TGA	67	W/Stop	Nonsyn	Coding region
mtbs0069989_A	69989	1370	G	A	2045	Rv0064		GGT/GAT	457	G/D	Nonsyn	Coding region
mtbs0070267_T	70267	1648	G	T	950	Rv0064		GTC/TTC	550	V/F	Nonsyn	Coding region
mtbs0070816_G	70816	2197	A	G	2022	Rv0064		AAC/GAC	733	N/D	Nonsyn	Coding region
mtbs0071336_C	71336	2717	G	C	2339	Rv0064		CGC/CCC	906	R/P	Nonsyn	Coding region
mtbs0075233_A	75233	75233	C	A	890
mtbs0075940_C	75940	640	G	C	1976	Rv0068		GTG/CTG	214	V/L	Nonsyn	Coding region
mtbs0079480_C	79480	79480	T	C	774
mtbs0087468_T	87468	334	C	T	789	Rv0078A		GAG/AAG	112	E/K	Nonsyn	Coding region
mtbs0092199_G	92199	1800	T	G	2040	Rv0083		ACT/ACG	600	T/T	Syn	Coding region
mtbs0094388_A	94388	438	G	A	771	Rv0086	hycQ	GGG/GGA	146	G/G	Syn	Coding region
mtbs0096894_T	96894	96894	C	T	712
mtbs0097350_C	97350	424	A	C	736	Rv0088		AGG/CGG	142	R/R	Syn	Coding region
mtbs0101539_T	101539	957	C	T	804	Rv0092	ctpA	GGC/GGT	319	G/G	Syn	Coding region
mtbs0101569_T	101569	987	C	T	1	Rv0092	ctpA	GGC/GGT	329	G/G	Syn	Coding region
mtbs0103756_T	103756	908	G	T	692	Rv0094c		CCC/CAC	303	P/H	Nonsyn	Coding region
mtbs0104712_T	104712	504	C	T	527			ACG/ACA	168	T/T	Syn	Repeat region
mtbs0104767_T	104767	449	C	T	151			CGC/CAC	150	R/H	Nonsyn	Repeat region
mtbs0104773_T	104773	443	C	T	121			TGG/TAG	148	W/Stop	Nonsyn	Repeat region
mtbs0104775_G	104775	441	A	G	128			CGT/CGC	147	R/R	Syn	Repeat region
mtbs0104782_A	104782	434	G	A	53			GCG/GTG	145	A/V	Nonsyn	Repeat region
mtbs0104785_G	104785	431	A	G	62			CTG/CCG	144	L/P	Nonsyn	Repeat region
mtbs0104791_T	104791	425	C	T	28			CGC/CAC	142	R/H	Nonsyn	Repeat region
mtbs0104794_T	104794	422	C	T	26			GGG/GAG	141	G/E	Nonsyn	Repeat region
mtbs0104800_A	104800	416	T	A	7			AAC/ATC	139	N/I	Nonsyn	Repeat region
mtbs0104801_G	104801	415	T	G	8			AAC/CAC	139	N/H	Nonsyn	Repeat region
mtbs0104803_T	104803	413	C	T	9			GGC/GAC	138	G/D	Nonsyn	Repeat region
mtbs0104806_G	104806	410	T	G	6			TAG/TCG	137	Stop/S	Nonsyn	Repeat region
mtbs0104817_G	104817	399	T	G	124			GAA/GAC	133	E/D	Nonsyn	Repeat region
mtbs0104824_A	104824	392	C	A	649			AGC/ATC	131	S/I	Nonsyn	Repeat region
mtbs0104830_A	104830	386	C	A	454			CGA/CTA	129	R/L	Nonsyn	Repeat region
mtbs0104833_G	104833	383	C	G	516			GGC/GCC	128	G/A	Nonsyn	Repeat region
mtbs0104838_G	104838	378	T	G	756			GAA/GAC	126	E/D	Nonsyn	Repeat region
mtbs0104856_T	104856	360	C	T	813			CTG/CTA	120	L/L	Syn	Repeat region
mtbs0104858_A	104858	358	G	A	813			CTG/TTG	120	L/L	Syn	Repeat region
mtbs0104936_C	104936	280	T	C	1134			ACG/GCG	94	T/A	Nonsyn	Repeat region
mtbs0104944_A	104944	272	G	A	1234			GCC/GTC	91	A/V	Nonsyn	Repeat region
mtbs0104962_A	104962	254	G	A	1415			GCG/GTG	85	A/V	Nonsyn	Repeat region
mtbs0105007_G	105007	209	C	G	850			AGC/ACC	70	S/T	Nonsyn	Repeat region
mtbs0105011_A	105011	205	G	A	844			CTG/TTG	69	L/L	Syn	Repeat region
mtbs0105021_A	105021	195	G	A	837			TCC/TCT	65	S/S	Syn	Repeat region
mtbs0105045_C	105045	171	G	C	1444			GAC/GAG	57	D/E	Nonsyn	Repeat region
mtbs0105139_A	105139	77	C	A	718			GGG/GTG	26	G/V	Nonsyn	Repeat region
mtbs0105736_C	105736	413	T	C	892	Rv0096	PPE1	GTC/GCC	138	V/A	Nonsyn	Coding region
mtbs0116000_G	116000	6000	T	G	2024	Rv0101	nrp	GTT/GTG	2000	V/V	Syn	Coding region
mtbs0122109_G	122109	65	A	G	2132	Rv0103c	ctpB	TTG/TCG	22	L/S	Nonsyn	Coding region
mtbs0123454_T	123454	1138	C	T	749	Rv0104		CAA/TAA	380	Q/Stop	Nonsyn	Coding region
mtbs0123520_C	123520	1204	T	C	958	Rv0104		TAT/CAT	402	Y/H	Nonsyn	Coding region
mtbs0132417_G	132417	1036	C	G	2347	Rv0109	PE_PGRS1	CGC/GGC	346	R/G	Nonsyn	Coding region
mtbs0133839_T	133839	133839	C	T	1866
mtbs0135329_T	135329	1380	C	T	789	Rv0111		CCC/CCT	460	P/P	Syn	Coding region
mtbs0139297_T	139297	785	G	T	768	Rv0115	hddA	GGC/GTC	262	G/V	Nonsyn	Coding region
mtbs0141623_A	141623	424	G	A	730	Rv0117	oxyS	GAT/AAT	142	D/N	Nonsyn	Coding region
mtbs0143207_C	143207	670	T	C	996	Rv0118c	oxcA	AGC/GGC	224	S/G	Nonsyn	Coding region
mtbs0146087_C	146087	1685	T	C	1977	Rv0120c	fusA2	AAT/AGT	562	N/S	Nonsyn	Coding region
mtbs0146236_G	146236	1536	C	G	809	Rv0120c	fusA2	GCG/GCC	512	A/A	Syn	Coding region
mtbs0147262_T	147262	510	G	T	759	Rv0120c	fusA2	GAC/GAA	170	D/E	Nonsyn	Coding region
mtbs0151798_G	151798	651	A	G	65	Rv0125	pepA	GGA/GGG	217	G/G	Syn	Coding region
mtbs0154283_C	154283	52	T	C	2034	Rv0127	mak	TCG/CCG	18	S/P	Nonsyn	Coding region
mtbs0163705_T	163705	340	C	T	854	Rv0136	cyp138	CCT/TCT	114	P/S	Nonsyn	Coding region
mtbs0163706_T	163706	341	C	T	852	Rv0136	cyp138	CCT/CTT	114	P/L	Nonsyn	Coding region
mtbs0166565_G	166565	739	A	G	713	Rv0139		ATC/GTC	247	I/V	Nonsyn	Coding region
mtbs0177857_A	177857	1453	G	A	2259	Rv0151c	PE1	CTG/TTG	485	L/L	Syn	Coding region
mtbs0182824_A	182824	375	G	A	782	Rv0154c	fadE2	ATC/ATT	125	I/I	Syn	Coding region
mtbs0183091_G	183091	108	C	G	788	Rv0154c	fadE2	CCG/CCC	36	P/P	Syn	Coding region
mtbs0188800_C	188800	40	T	C	2130	Rv0159c	PE3	ACG/GCG	14	T/A	Nonsyn	Coding region
mtbs0190816_C	190816	210	A	C	808	Rv0161		TCA/TCC	70	S/S	Syn	Coding region
mtbs0194681_C	194681	135	G	C	1900	Rv0165c	mce1R	CTC/CTG	45	L/L	Syn	Coding region
mtbs0195682_G	195682	690	C	G	770	Rv0166	fadD5	GTC/GTG	230	V/V	Syn	Coding region
mtbs0196642_T	196642	1650	C	T	1684	Rv0166	fadD5	AAC/AAT	550	N/N	Syn	Coding region
mtbs0199470_G	199470	937	T	G	1009	Rv0169	mce1A	TCC/GCC	313	S/A	Nonsyn	Coding region
mtbs0203038_C	203038	563	T	C	747	Rv0172	mce1D	ATC/ACC	188	I/T	Nonsyn	Coding region
mtbs0204094_T	204094	30	G	T	757	Rv0173	lprK	GTG/GTT	10	V/V	Syn	Coding region
mtbs0206339_C	206339	1109	T	C	2004	Rv0174	mce1F	CTG/CCG	370	L/P	Nonsyn	Coding region
mtbs0206481_G	206481	1251	C	G	1145	Rv0174	mce1F	CCC/CCG	417	P/P	Syn	Coding region
mtbs0206484_T	206484	1254	G	T	1148	Rv0174	mce1F	GGG/GGT	418	G/G	Syn	Coding region
mtbs0208590_C	208590	174	A	C	692	Rv0177		CGA/CGC	58	R/R	Syn	Coding region
mtbs0213147_A	213147	994	C	A	766	Rv0182c	sigG	GAC/TAC	332	D/Y	Nonsyn	Coding region
mtbs0213281_T	213281	860	C	T	781	Rv0182c	sigG	GGC/GAC	287	G/D	Nonsyn	Coding region
mtbs0215977_T	215977	263	C	T	807	Rv0185		GCG/GTG	88	A/V	Nonsyn	Coding region
mtbs0217201_C	217201	933	T	C	995	Rv0186	bglS	AAT/AAC	311	N/N	Syn	Coding region
mtbs0222925_A	222925	637	G	A	815	Rv0191		GCT/ACT	213	A/T	Nonsyn	Coding region
mtbs0223942_C	223942	379	T	C	2289	Rv0192		TCG/CCG	127	S/P	Nonsyn	Coding region
mtbs0225323_C	225323	1249	T	C	1992	Rv0193c		AAG/GAG	417	K/E	Nonsyn	Coding region
mtbs0227098_C	227098	221	T	C	1904	Rv0194		ATG/ACG	74	M/T	Nonsyn	Coding region
mtbs0230170_T	230170	3293	C	T	792	Rv0194		CCC/CTC	1098	P/L	Nonsyn	Coding region
mtbs0231114_G	231114	216	C	G	1774	Rv0195		GCC/GCG	72	A/A	Syn	Coding region
mtbs0234477_G	234477	2247	T	G	2287	Rv0197		TAT/TAG	749	Y/Stop	Nonsyn	Coding region
mtbs0249522_C	249522	485	T	C	1095	Rv0209		GTG/GCG	162	V/A	Nonsyn	Coding region
mtbs0251575_A	251575	1456	G	A	1025	Rv0210		GCG/ACG	486	A/T	Nonsyn	Coding region
mtbs0261869_C	261869	946	T	C	2307	Rv0218		TGT/CGT	316	C/R	Nonsyn	Coding region
mtbs0262268_T	262268	15	A	T	884	Rv0219		GCA/GCT	5	A/A	Syn	Coding region
mtbs0264129_A	264129	63	G	A	758	Rv0221		ATG/ATA	21	M/I	Nonsyn	Coding region
mtbs0265554_C	265554	48	A	C	1853	Rv0222	echA1	GTA/GTC	16	V/V	Syn	Coding region
mtbs0267751_C	267751	14	G	C	766	Rv0223c		GCC/GGC	5	A/G	Nonsyn	Coding region
mtbs0270430_C	270430	1135	G	C	856	Rv0226c		CCT/GCT	379	P/A	Nonsyn	Coding region
mtbs0278021_C	278021	123	T	C	817	Rv0232		CGT/CGC	41	R/R	Syn	Coding region
mtbs0278681_G	278681	97	C	G	1980	Rv0233	nrdB	CAT/GAT	33	H/D	Nonsyn	Coding region
mtbs0282892_T	282892	3960	C	T	840	Rv0236c	aftD	ACG/ACA	1320	T/T	Syn	Coding region
mtbs0283610_A	283610	3242	G	A	885	Rv0236c	aftD	GCC/GTC	1081	A/V	Nonsyn	Coding region
mtbs0283614_C	283614	3238	T	C	2089	Rv0236c	aftD	AGC/GGC	1080	S/G	Nonsyn	Coding region
mtbs0285772_C	285772	1080	A	C	2245	Rv0236c	aftD	CCT/CCG	360	P/P	Syn	Coding region
mtbs0285871_G	285871	981	A	G	2129	Rv0236c	aftD	GTT/GTC	327	V/V	Syn	Coding region
mtbs0288260_T	288260	1075	C	T	752	Rv0237	lpqI	CTG/TTG	359	L/L	Syn	Coding region
mtbs0295731_C	295731	295731	T	C	460
mtbs0296312_T	296312	308	C	T	741	Rv0245		TCC/TTC	103	S/F	Nonsyn	Coding region
mtbs0304923_G	304923	2058	A	G	1246	Rv0252	nirB	AAA/AAG	686	K/K	Syn	Coding region
mtbs0305188_T	305188	2323	G	T	749	Rv0252	nirB	GTG/TTG	775	V/L	Nonsyn	Coding region
mtbs0310973_A	310973	545	G	A	2036	Rv0259c		GCG/GTG	182	A/V	Nonsyn	Coding region
mtbs0311613_T	311613	1047	G	T	1937	Rv0260c		GTC/GTA	349	V/V	Syn	Coding region
mtbs0311889_T	311889	771	C	T	712	Rv0260c		ACG/ACA	257	T/T	Syn	Coding region
mtbs0325505_C	325505	939	T	C	963	Rv0270	fadD2	GTT/GTC	313	V/V	Syn	Coding region
mtbs0325703_T	325703	1137	C	T	65	Rv0270	fadD2	GGC/GGT	379	G/G	Syn	Coding region
mtbs0333892_C	333892	2419	G	C	1969	Rv0278c	PE_PGRS3	CGC/GGC	807	R/G	Nonsyn	Coding region
mtbs0336369_T	336369	336369	C	T	5
mtbs0336370_G	336370	336370	A	G	3
mtbs0336380_T	336380	336380	A	T	11
mtbs0336400_G	336400	336400	C	G	10
mtbs0336403_G	336403	336403	C	G	8
mtbs0336405_G	336405	336405	A	G	10
mtbs0336428_G	336428	336428	A	G	7
mtbs0336431_T	336431	336431	C	T	5
mtbs0336439_G	336439	336439	A	G	6
mtbs0336441_T	336441	336441	C	T	4
mtbs0336442_A	336442	336442	G	A	6
mtbs0336449_C	336449	336449	T	C	5
mtbs0336451_G	336451	336451	T	G	14
mtbs0336452_G	336452	336452	A	G	5
mtbs0336459_A	336459	336459	G	A	5
mtbs0336474_G	336473	336473	T	G	1			NULL		NULL	NULL
mtbs0336480_G	336480	336480	A	G	23
mtbs0336504_T	336504	336504	G	T	105
mtbs0336535_G	336535	336535	T	G	49
mtbs0336537_G	336537	336537	T	G	37
mtbs0336540_T	336540	336540	G	T	28
mtbs0336546_G	336546	336546	T	G	25
mtbs0336560_C	336560	2514	T	C	16	Rv0279c	PE_PGRS4	TAA/TAG	838	Stop/Stop	Syn	Coding region
mtbs0336590_C	336590	2484	G	C	55	Rv0279c	PE_PGRS4	ATC/ATG	828	I/M	Nonsyn	Coding region
mtbs0336592_G	336592	2482	T	G	53	Rv0279c	PE_PGRS4	ATC/CTC	828	I/L	Nonsyn	Coding region
mtbs0336611_C	336611	2463	G	C	54	Rv0279c	PE_PGRS4	GCC/GCG	821	A/A	Syn	Coding region
mtbs0336617_C	336617	2457	G	C	57	Rv0279c	PE_PGRS4	CCC/CCG	819	P/P	Syn	Coding region
mtbs0336620_C	336620	2454	T	C	59	Rv0279c	PE_PGRS4	ACA/ACG	818	T/T	Syn	Coding region
mtbs0336698_G	336698	2376	C	G	213	Rv0279c	PE_PGRS4	GGG/GGC	792	G/G	Syn	Coding region
mtbs0336701_G	336701	2373	A	G	506	Rv0279c	PE_PGRS4	GGT/GGC	791	G/G	Syn	Coding region
mtbs0336707_A	336707	2367	G	A	547	Rv0279c	PE_PGRS4	GAC/GAT	789	D/D	Syn	Coding region
mtbs0336708_C	336708	2366	T	C	773	Rv0279c	PE_PGRS4	GAC/GGC	789	D/G	Nonsyn	Coding region
mtbs0336710_G	336710	2364	A	G	785	Rv0279c	PE_PGRS4	GCT/GCC	788	A/A	Syn	Coding region
mtbs0336728_A	336728	2346	G	A	110	Rv0279c	PE_PGRS4	GGC/GGT	782	G/G	Syn	Coding region
mtbs0338719_C	338719	355	T	C	230	Rv0279c	PE_PGRS4	ACC/GCC	119	T/A	Nonsyn	Coding region
mtbs0338768_A	338768	306	G	A	111	Rv0279c	PE_PGRS4	ATC/ATT	102	I/I	Syn	Coding region
mtbs0338774_A	338774	300	G	A	111	Rv0279c	PE_PGRS4	GCC/GCT	100	A/A	Syn	Coding region
mtbs0338775_T	338775	299	G	T	110	Rv0279c	PE_PGRS4	GCC/GAC	100	A/D	Nonsyn	Coding region
mtbs0338777_C	338777	297	G	C	111	Rv0279c	PE_PGRS4	CTC/CTG	99	L/L	Syn	Coding region
mtbs0338810_C	338810	264	G	C	195	Rv0279c	PE_PGRS4	GCC/GCG	88	A/A	Syn	Coding region
mtbs0338844_G	338844	230	A	G	1286	Rv0279c	PE_PGRS4	GTG/GCG	77	V/A	Nonsyn	Coding region
mtbs0338845_T	338845	229	C	T	1239	Rv0279c	PE_PGRS4	GTG/ATG	77	V/M	Nonsyn	Coding region
mtbs0338876_A	338876	198	G	A	1165	Rv0279c	PE_PGRS4	AGC/AGT	66	S/S	Syn	Coding region
mtbs0338903_C	338903	171	G	C	1228	Rv0279c	PE_PGRS4	GCC/GCG	57	A/A	Syn	Coding region
mtbs0338960_C	338960	114	T	C	1254	Rv0279c	PE_PGRS4	GCA/GCG	38	A/A	Syn	Coding region
mtbs0338963_C	338963	111	T	C	1242	Rv0279c	PE_PGRS4	ACA/ACG	37	T/T	Syn	Coding region
mtbs0340132_A	340132	769	G	A	885	Rv0280	PPE3	GAA/AAA	257	E/K	Nonsyn	Coding region
mtbs0340372_C	340372	1009	T	C	2112	Rv0280	PPE3	TCG/CCG	337	S/P	Nonsyn	Coding region
mtbs0342146_C	342146	17	A	C	1036	Rv0282	eccA3	GAA/GCA	6	E/A	Nonsyn	Coding region
mtbs0346275_G	346275	641	C	G	1948	Rv0284	eccC3	CCG/CGG	214	P/R	Nonsyn	Coding region
mtbs0353309_A	353309	227	G	A	778	Rv0290	eccD3	AGC/AAC	76	S/N	Nonsyn	Coding region
mtbs0353365_A	353365	283	G	A	797	Rv0290	eccD3	GCC/ACC	95	A/T	Nonsyn	Coding region
mtbs0356528_G	356528	649	A	G	2072	Rv0292	eccE3	AAT/GAT	217	N/D	Nonsyn	Coding region
mtbs0363464_A	363464	213	G	A	771	Rv0298		CGG/CGA	71	R/R	Syn	Coding region
mtbs0364854_G	364854	250	C	G	745	Rv0302		CAT/GAT	84	H/D	Nonsyn	Coding region
mtbs0372913_C	372913	2799	A	C	1287	Rv0305c	PPE6	GGT/GGG	933	G/G	Syn	Coding region
mtbs0374353_G	374353	1359	A	G	730	Rv0305c	PPE6	CGT/CGC	453	R/R	Syn	Coding region
mtbs0376774_C	376774	282	T	C	1975	Rv0307c		GCA/GCG	94	A/A	Syn	Coding region
mtbs0377014_T	377014	42	C	T	747	Rv0307c		CTG/CTA	14	L/L	Syn	Coding region
mtbs0379528_T	379528	357	G	T	766	Rv0311		GAG/GAT	119	E/D	Nonsyn	Coding region
mtbs0383716_T	383716	115	C	T	905	Rv0315		CCG/TCG	39	P/S	Nonsyn	Coding region
mtbs0384380_C	384380	779	A	C	1943	Rv0315		AAG/ACG	260	K/T	Nonsyn	Coding region
mtbs0386432_G	386432	668	C	G	2061	Rv0318c		GGG/GCG	223	G/A	Nonsyn	Coding region
mtbs0390701_T	390701	551	C	T	1	Rv0323c		CGA/CAA	184	R/Q	Nonsyn	Coding region
mtbs0390828_C	390828	424	T	C	2118	Rv0323c		AGT/GGT	142	S/G	Nonsyn	Coding region
mtbs0391853_G	391853	502	A	G	1451	Rv0324		ACT/GCT	168	T/A	Nonsyn	Coding region
mtbs0392261_C	392261	223	T	C	981	Rv0325		TAG/CAG	75	Stop/Q	Nonsyn	Coding region
mtbs0396199_C	396199	396199	T	C	827
mtbs0401318_G	401318	1127	A	G	190	Rv0336		TAC/TGC	376	Y/C	Nonsyn	Coding region
mtbs0403980_A	403980	1862	G	A	1953	Rv0338c		GCC/GTC	621	A/V	Nonsyn	Coding region
mtbs0404326_C	404326	1516	T	C	1794	Rv0338c		AGG/GGG	506	R/G	Nonsyn	Coding region
mtbs0407167_T	407167	1282	C	T	64	Rv0339c		GCA/ACA	428	A/T	Nonsyn	Coding region
mtbs0414486_T	414486	456	C	T	1948	Rv0344c	lpqJ	GAG/GAA	152	E/E	Syn	Coding region
mtbs0420008_G	420008	174	A	G	1910	Rv0350	dnaK	GCA/GCG	58	A/A	Syn	Coding region
mtbs0424981_A	424981	9699	G	A	805	Rv0355c	PPE8	CCC/CCT	3233	P/P	Syn	Coding region
mtbs0428698_T	428698	5982	C	T	963	Rv0355c	PPE8	GCG/GCA	1994	A/A	Syn	Coding region
mtbs0432536_T	432536	2144	C	T	735	Rv0355c	PPE8	GGT/GAT	715	G/D	Nonsyn	Coding region
mtbs0441823_T	441823	477	C	T	799	Rv0363c	fba	GAG/GAA	159	E/E	Syn	Coding region
mtbs0445780_T	445780	746	C	T	1030	Rv0368c		CGT/CAT	249	R/H	Nonsyn	Coding region
mtbs0454295_C	454295	78	T	C	2086	Rv0376c		CCA/CCG	26	P/P	Syn	Coding region
mtbs0454333_G	454333	40	T	G	981	Rv0376c		ACG/CCG	14	T/P	Nonsyn	Coding region
mtbs0456594_C	456594	226	T	C	831	Rv0380c		ATG/GTG	76	M/V	Nonsyn	Coding region
mtbs0457452_G	457452	372	T	G	1926	Rv0381c		ACA/ACC	124	T/T	Syn	Coding region
mtbs0459399_C	459399	459399	A	C	2143
mtbs0460413_T	460413	1590	C	T	753	Rv0384c	clpB	AAG/AAA	530	K/K	Syn	Coding region
mtbs0465300_T	465300	1890	C	T	843	Rv0386		TTC/TTT	630	F/F	Syn	Coding region
mtbs0467516_C	467516	486	G	C	2237	Rv0388c	PPE9	TCC/TCG	162	S/S	Syn	Coding region
mtbs0467526_G	467526	476	C	G	2200	Rv0388c	PPE9	GGG/GCG	159	G/A	Nonsyn	Coding region
mtbs0467546_C	467546	456	G	C	2163	Rv0388c	PPE9	GAC/GAG	152	D/E	Nonsyn	Coding region
mtbs0467557_C	467557	445	A	C	2147	Rv0388c	PPE9	TTG/GTG	149	L/V	Nonsyn	Coding region
mtbs0467564_C	467564	438	A	C	2138	Rv0388c	PPE9	CAT/CAG	146	H/Q	Nonsyn	Coding region
mtbs0467585_C	467585	417	G	C	2105	Rv0388c	PPE9	CAC/CAG	139	H/Q	Nonsyn	Coding region
mtbs0467590_C	467590	412	T	C	2100	Rv0388c	PPE9	ACG/GCG	138	T/A	Nonsyn	Coding region
mtbs0467621_G	467621	381	T	G	2086	Rv0388c	PPE9	GGA/GGC	127	G/G	Syn	Coding region
mtbs0467638_T	467638	364	G	T	2090	Rv0388c	PPE9	CAG/AAG	122	Q/K	Nonsyn	Coding region
mtbs0475178_C	475178	239	T	C	2049	Rv0395		GTC/GCC	80	V/A	Nonsyn	Coding region
mtbs0477234_G	477234	87	T	G	866	Rv0398c		GAA/GAC	29	E/D	Nonsyn	Coding region
mtbs0483935_G	483935	483935	T	G	1225
mtbs0484005_T	484005	29	G	T	694	Rv0404	fadD30	CGT/CTT	10	R/L	Nonsyn	Coding region
mtbs0484596_T	484596	620	C	T	745	Rv0404	fadD30	CCG/CTG	207	P/L	Nonsyn	Coding region
mtbs0489935_C	489935	771	G	C	1718	Rv0406c		ACC/ACG	257	T/T	Syn	Coding region
mtbs0491742_C	491742	960	T	C	945	Rv0407	fgd1	TTT/TTC	320	F/F	Syn	Coding region
mtbs0492150_C	492150	365	G	C	998	Rv0408	pta	GGC/GCC	122	G/A	Nonsyn	Coding region
mtbs0497491_A	497491	810	G	A	785	Rv0411c	glnH	GAC/GAT	270	D/D	Syn	Coding region
mtbs0498531_G	498531	1089	A	G	1034	Rv0412c		GCT/GCC	363	A/A	Syn	Coding region
mtbs0498557_A	498557	1063	C	A	1946	Rv0412c		GAC/TAC	355	D/Y	Nonsyn	Coding region
mtbs0502589_G	502589	224	C	G	2050	Rv0417	thiG	TCC/TGC	75	S/C	Nonsyn	Coding region
mtbs0503354_C	503354	503354	G	C	1834
mtbs0505974_A	505974	889	G	A	1034	Rv0419	lpqM	GCG/ACG	297	A/T	Nonsyn	Coding region
mtbs0513257_C	513257	2065	T	C	1934	Rv0425c	ctpH	ATG/GTG	689	M/V	Nonsyn	Coding region
mtbs0517358_C	517358	446	T	C	1075	Rv0428c		GAC/GGC	149	D/G	Nonsyn	Coding region
mtbs0518987_T	518987	255	C	T	880	Rv0430		CGC/CGT	85	R/R	Syn	Coding region
mtbs0524891_A	524891	500	C	A	1262	Rv0436c	pssA	GGC/GTC	167	G/V	Nonsyn	Coding region
mtbs0533547_G	533547	243	C	G	812	Rv0444c	rskA	GAG/GAC	81	E/D	Nonsyn	Coding region
mtbs0541201_G	541201	291	A	G	1821	Rv0450c	mmpL4	CTT/CTC	97	L/L	Syn	Coding region
mtbs0542014_G	542014	542014	C	G	717
mtbs0542514_G	542514	373	C	G	743	Rv0452		CAT/GAT	125	H/D	Nonsyn	Coding region
mtbs0546357_G	546357	447	A	G	990	Rv0456c	echA2	ACT/ACC	149	T/T	Syn	Coding region
mtbs0549363_G	549363	245	C	G	787	Rv0457c		CGC/CCC	82	R/P	Nonsyn	Coding region
mtbs0551525_C	551525	328	A	C	1949	Rv0459		AGA/CGA	110	R/R	Syn	Coding region
mtbs0555366_T	555366	941	C	T	534	Rv0465c		CGG/CAG	314	R/Q	Nonsyn	Coding region
mtbs0555991_G	555991	316	A	G	1122	Rv0465c		TGC/CGC	106	C/R	Nonsyn	Coding region
mtbs0560615_C	560615	728	A	C	64	Rv0469	umaA	GAG/GCG	243	E/A	Nonsyn	Coding region
mtbs0561776_T	561776	561776	C	T	722
mtbs0561777_T	561777	561777	C	T	719
mtbs0565334_C	565334	314	T	C	38	Rv0474		ATC/ACC	105	I/T	Nonsyn	Coding region
mtbs0565655_G	565655	565655	A	G	1201
mtbs0572591_T	572591	882	C	T	882	Rv0483	lprQ	GAC/GAT	294	D/D	Syn	Coding region
mtbs0573262_G	573262	540	A	G	2013	Rv0484c		GGT/GGC	180	G/G	Syn	Coding region
mtbs0575907_T	575907	560	C	T	862	Rv0486	mshA	GCA/GTA	187	A/V	Nonsyn	Coding region
mtbs0580772_A	580772	41	T	A	13			GTG/GAG	14	V/E	Nonsyn	Repeat region
mtbs0583171_C	583171	208	A	C	879	Rv0492c		TCG/GCG	70	S/A	Nonsyn	Coding region
mtbs0584171_C	584171	520	T	C	1042	Rv0493c		AGT/GGT	174	S/G	Nonsyn	Coding region
mtbs0590436_C	590436	354	T	C	1962	Rv0500	proC	GCT/GCC	118	A/A	Syn	Coding region
mtbs0597816_G	597816	618	A	G	1714	Rv0507	mmpL2	GCA/GCG	206	A/A	Syn	Coding region
mtbs0598475_A	598475	1277	G	A	1948	Rv0507	mmpL2	CGC/CAC	426	R/H	Nonsyn	Coding region
mtbs0599868_G	599868	2670	A	G	955	Rv0507	mmpL2	CGA/CGG	890	R/R	Syn	Coding region
mtbs0605150_A	605150	549	G	A	749	Rv0512	hemB	CGG/CGA	183	R/R	Syn	Coding region
mtbs0610120_G	610120	610120	T	G	1890
mtbs0611048_G	611048	611048	T	G	736
mtbs0620625_G	620625	735	A	G	760	Rv0529	ccsA	ATA/ATG	245	I/M	Nonsyn	Coding region
mtbs0621598_T	621598	692	C	T	758	Rv0530		CCC/CTC	231	P/L	Nonsyn	Coding region
mtbs0623472_G	623472	680	A	G	2337	Rv0532	PE_PGRS6	GAC/GGC	227	D/G	Nonsyn	Coding region
mtbs0623508_G	623508	716	C	G	2379	Rv0532	PE_PGRS6	GCC/GGC	239	A/G	Nonsyn	Coding region
mtbs0627485_A	627485	238	G	A	926	Rv0536	galE3	GTC/ATC	80	V/I	Nonsyn	Coding region
mtbs0628864_C	628864	868	T	C	775	Rv0537c		ACC/GCC	290	T/A	Nonsyn	Coding region
mtbs0630722_C	630722	683	G	C	2092	Rv0538		CGG/CCG	228	R/P	Nonsyn	Coding region
mtbs0637319_A	637319	145	G	A	1727	Rv0545c	pitA	CCT/TCT	49	P/S	Nonsyn	Coding region
mtbs0640954_G	640954	640954	A	G	744
mtbs0648002_G	648002	44	T	G	1807	Rv0556		CTC/CGC	15	L/R	Nonsyn	Coding region
mtbs0648856_C	648856	321	T	C	1022	Rv0557	mgtA	GGT/GGC	107	G/G	Syn	Coding region
mtbs0655986_G	655986	655986	T	G	949
mtbs0657081_T	657081	390	C	T	869	Rv0565c		GTG/GTA	130	V/V	Syn	Coding region
mtbs0657142_T	657142	329	C	T	750	Rv0565c		CGC/CAC	110	R/H	Nonsyn	Coding region
mtbs0659341_C	659341	659341	T	C	1088
mtbs0662911_C	662911	1617	T	C	1114	Rv0570	nrdZ	GCT/GCC	539	A/A	Syn	Coding region
mtbs0665293_G	665293	91	A	G	1727	Rv0572c		TTC/CTC	31	F/L	Nonsyn	Coding region
mtbs0669033_A	669033	713	T	A	752	Rv0575c		GAC/GTC	238	D/V	Nonsyn	Coding region
mtbs0669398_C	669398	348	T	C	1985	Rv0575c		CAA/CAG	116	Q/Q	Syn	Coding region
mtbs0670545_A	670545	698	G	A	1204	Rv0576		CGC/CAC	233	R/H	Nonsyn	Coding region
mtbs0672491_G	672491	3426	C	G	2111	Rv0578c	PE_PGRS7	GGG/GGC	1142	G/G	Syn	Coding region
mtbs0673564_T	673564	2353	C	T	760	Rv0578c	PE_PGRS7	GCC/ACC	785	A/T	Nonsyn	Coding region
mtbs0683829_T	683829	444	C	T	790	Rv0585c		GCG/GCA	148	A/A	Syn	Coding region
mtbs0685461_G	685461	333	C	G	2142	Rv0587	yrbE2A	GCC/GCG	111	A/A	Syn	Coding region
mtbs0685608_C	685608	480	T	C	1810	Rv0587	yrbE2A	CTT/CTC	160	L/L	Syn	Coding region
mtbs0686264_A	686264	337	G	A	740	Rv0588	yrbE2B	GCG/ACG	113	A/T	Nonsyn	Coding region
mtbs0686972_C	686972	152	T	C	1843	Rv0589	mce2A	TTC/TCC	51	F/S	Nonsyn	Coding region
mtbs0690450_C	690450	1392	A	C	1202	Rv0591	mce2C	GCA/GCC	464	A/A	Syn	Coding region
mtbs0690465_G	690465	1407	T	G	2222	Rv0591	mce2C	CTT/CTG	469	L/L	Syn	Coding region
mtbs0694531_G	694531	1295	A	G	842	Rv0594	mce2F	AAC/AGC	432	N/S	Nonsyn	Coding region
mtbs0696917_T	696917	696917	G	T	739
mtbs0698968_A	698968	27	G	A	2167	Rv0601c		GGC/GGT	9	G/G	Syn	Coding region
mtbs0699840_C	699840	699840	A	C	748
mtbs0707334_C	707334	2182	T	C	910	Rv0613c		ACC/GCC	728	T/A	Nonsyn	Coding region
mtbs0712693_G	712693	520	A	G	1433	Rv0619	galTb	ACC/GCC	174	T/A	Nonsyn	Coding region
mtbs0713310_C	713310	595	T	C	1158	Rv0620	galK	TGT/CGT	199	C/R	Nonsyn	Coding region
mtbs0721373_G	721373	360	T	G	841	Rv0629c	recD	GAA/GAC	120	E/D	Nonsyn	Coding region
mtbs0725190_A	725190	3117	G	A	1003	Rv0631c	recC	TTC/TTT	1039	F/F	Syn	Coding region
mtbs0738522_G	738522	639	T	G	782	Rv0644c	mmaA2	GAA/GAC	213	E/D	Nonsyn	Coding region
mtbs0754186_G	754186	224	A	G	2140	Rv0658c		CTC/CCC	75	L/P	Nonsyn	Coding region
mtbs0757139_A	757139	1003	C	A	797	Rv0663	atsD	CGC/AGC	335	R/S	Nonsyn	Coding region
mtbs0757182_G	757182	1046	A	G	1003	Rv0663	atsD	GAC/GGC	349	D/G	Nonsyn	Coding region
mtbs0763031_C	763031	3225	T	C	972	Rv0667	rpoB	GCT/GCC	1075	A/A	Syn	Coding region
mtbs0766645_C	766645	3276	A	C	532	Rv0668	rpoC	GAA/GAC	1092	E/D	Nonsyn	Coding region
mtbs0767414_A	767414	767414	G	A	1330
mtbs0767670_C	767670	767670	T	C	64
mtbs0773497_A	773497	375	C	A	801	Rv0673	echA4	TTC/TTA	125	F/L	Nonsyn	Coding region
mtbs0775639_C	775639	2842	T	C	2135	Rv0676c	mmpL5	ATT/GTT	948	I/V	Nonsyn	Coding region
mtbs0776100_A	776100	2381	G	A	993	Rv0676c	mmpL5	ACC/ATC	794	T/I	Nonsyn	Coding region
mtbs0776182_T	776182	2299	C	T	728	Rv0676c	mmpL5	GAC/AAC	767	D/N	Nonsyn	Coding region
mtbs0779615_C	779615	426	G	C	764	Rv0679c		AAC/AAG	142	N/K	Nonsyn	Coding region
mtbs0781395_C	781395	781395	T	C	1963
mtbs0791249_T	791249	418	C	T	720	Rv0691c		GCC/ACC	140	A/T	Nonsyn	Coding region
mtbs0797736_T	797736	804	C	T	753	Rv0697		CTC/CTT	268	L/L	Syn	Coding region
mtbs0798355_C	798355	1423	G	C	734	Rv0697		GCC/CCC	475	A/P	Nonsyn	Coding region
mtbs0799666_G	799666	38	A	G	790	Rv0699		GAC/GGC	13	D/G	Nonsyn	Coding region
mtbs0811753_T	811753	12	C	T	756	Rv0715	rplX	CAC/CAT	4	H/H	Syn	Coding region
mtbs0820483_T	820483	17	G	T	1832	Rv0727c	fucA	GCC/GAC	6	A/D	Nonsyn	Coding region
mtbs0820752_T	820752	725	C	T	1061	Rv0728c	serA2	CGC/CAC	242	R/H	Nonsyn	Coding region
mtbs0835611_T	835611	458	C	T	786	Rv0745		ACG/ATG	153	T/M	Nonsyn	Coding region
mtbs0836272_G	836272	572	A	G	1989	Rv0746	PE_PGRS9	GAG/GGG	191	E/G	Nonsyn	Coding region
mtbs0836291_G	836291	591	A	G	2013	Rv0746	PE_PGRS9	GGA/GGG	197	G/G	Syn	Coding region
mtbs0836658_G	836658	958	A	G	2283	Rv0746	PE_PGRS9	ACC/GCC	320	T/A	Nonsyn	Coding region
mtbs0837033_G	837033	1333	A	G	2337	Rv0746	PE_PGRS9	ACC/GCC	445	T/A	Nonsyn	Coding region
mtbs0840794_G	840794	2344	A	G	850	Rv0747	PE_PGRS10	AGC/GGC	782	S/G	Nonsyn	Coding region
mtbs0840795_C	840795	2345	G	C	856	Rv0747	PE_PGRS10	AGC/ACC	782	S/T	Nonsyn	Coding region
mtbs0841764_C	841764	111	G	C	1731	Rv0749A		ACC/ACG	37	T/T	Syn	Coding region
mtbs0842030_T	842030	842030	C	T	717
mtbs0843909_G	843909	506	A	G	65	Rv0752c	fadE9	GTG/GCG	169	V/A	Nonsyn	Coding region
mtbs0847995_C	847995	847995	T	C	1019
mtbs0852910_T	852910	515	C	T	2089	Rv0758	phoR	CCC/CTC	172	P/L	Nonsyn	Coding region
mtbs0857696_G	857696	342	A	G	1768	Rv0764c	cyp51	GCT/GCC	114	A/A	Syn	Coding region
mtbs0861216_G	861216	305	T	G	796	Rv0768	aldA	CTC/CGC	102	L/R	Nonsyn	Coding region
mtbs0866051_A	866051	1339	G	A	797	Rv0773c	ggtA	CGC/TGC	447	R/C	Nonsyn	Coding region
mtbs0876141_T	876141	1410	G	T	835	Rv0782	ptrBb	ACG/ACT	470	T/T	Syn	Coding region
mtbs0880562_T	880562	1223	G	T	1829	Rv0785		TGC/TTC	408	C/F	Nonsyn	Coding region
mtbs0882257_C	882257	799	T	C	1975	Rv0787		TAC/CAC	267	Y/H	Nonsyn	Coding region
mtbs0888647_T	888647	888647	C	T	525
mtbs0891011_G	891011	624	A	G	184	Rv0797		CTA/CTG	208	L/L	Syn	Coding region
mtbs0892272_A	892272	1002	G	A	532	Rv0799c		CCC/CCT	334	P/P	Syn	Coding region
mtbs0892416_T	892416	858	C	T	744	Rv0799c		GTG/GTA	286	V/V	Syn	Coding region
mtbs0893733_G	893733	416	T	G	2216	Rv0800	pepC	CTG/CGG	139	L/R	Nonsyn	Coding region
mtbs0900221_C	900221	1110	T	C	1771	Rv0806c	cpsY	GTA/GTG	370	V/V	Syn	Coding region
mtbs0903537_T	903537	1427	G	T	940	Rv0808	purF	CGG/CTG	476	R/L	Nonsyn	Coding region
mtbs0903550_C	903550	1440	T	C	1986	Rv0808	purF	GCT/GCC	480	A/A	Syn	Coding region
mtbs0903913_C	903913	189	T	C	2061	Rv0809	purM	GGT/GGC	63	G/G	Syn	Coding region
mtbs0906857_G	906857	435	A	G	2136	Rv0812		ATA/ATG	145	I/M	Nonsyn	Coding region
mtbs0908186_C	908186	298	T	C	853	Rv0814c	sseC2	ACC/GCC	100	T/A	Nonsyn	Coding region
mtbs0909166_T	909166	153	C	T	713	Rv0815c	cysA2	CTG/CTA	51	L/L	Syn	Coding region
mtbs0919351_C	919351	203	A	C	749	Rv0825c		TTC/TGC	68	F/C	Nonsyn	Coding region
mtbs0921813_G	921813	239	C	G	1957	Rv0829		GCA/GGA	80	A/G	Nonsyn	Coding region
mtbs0925453_T	925453	93	C	T	995	Rv0833	PE_PGRS13	GCC/GCT	31	A/A	Syn	Coding region
mtbs0927385_G	927385	2025	A	G	1773	Rv0833	PE_PGRS13	GGA/GGG	675	G/G	Syn	Coding region
mtbs0931123_C	931123	171	T	C	959	Rv0835	lpqQ	TAT/TAC	57	Y/Y	Syn	Coding region
mtbs0932280_C	932280	653	T	C	1087	Rv0836c		TAG/TGG	218	Stop/W	Nonsyn	Coding region
mtbs0934230_G	934230	934230	C	G	931
mtbs0934611_T	934611	934611	G	T	991
mtbs0940602_G	940602	505	C	G	804	Rv0844c	narL	GGT/CGT	169	G/R	Nonsyn	Coding region
mtbs0941722_G	941722	533	T	G	699	Rv0845		ATT/AGT	178	I/S	Nonsyn	Coding region
mtbs0941845_A	941845	656	C	A	1063	Rv0845		GCG/GAG	219	A/E	Nonsyn	Coding region
mtbs0945214_A	945214	277	G	A	1846	Rv0848	cysK2	GGT/AGT	93	G/S	Nonsyn	Coding region
mtbs0949535_C	949535	1584	T	C	1995	Rv0853c	pdc	GCA/GCG	528	A/A	Syn	Coding region
mtbs0951702_T	951702	71	C	T	755	Rv0855	far	GCC/GTC	24	A/V	Nonsyn	Coding region
mtbs0954101_T	954101	820	C	T	769	Rv0858c	dapC	GCC/ACC	274	A/T	Nonsyn	Coding region
mtbs0954468_G	954468	453	C	G	831	Rv0858c	dapC	GCG/GCC	151	A/A	Syn	Coding region
mtbs0955524_G	955524	448	A	G	2040	Rv0859	fadA	AGC/GGC	150	S/G	Nonsyn	Coding region
mtbs0957117_C	957117	825	T	C	1467	Rv0860	fadB	GAT/GAC	275	D/D	Syn	Coding region
mtbs0960367_G	960367	2246	A	G	1062	Rv0862c		TTG/TCG	749	L/S	Nonsyn	Coding region
mtbs0969762_G	969762	483	C	G	1033	Rv0872c	PE_PGRS15	GGG/GGC	161	G/G	Syn	Coding region
mtbs0972980_T	972980	727	C	T	857	Rv0874c		GGC/AGC	243	G/S	Nonsyn	Coding region
mtbs0979704_C	979704	343	G	C	2185	Rv0881		GGC/CGC	115	G/R	Nonsyn	Coding region
mtbs0986463_C	986463	986463	G	C	1826
mtbs0990001_C	990001	2596	G	C	1933	Rv0890c		CCC/GCC	866	P/A	Nonsyn	Coding region
mtbs0991896_C	991896	701	T	C	744	Rv0890c		GAG/GGG	234	E/G	Nonsyn	Coding region
mtbs0993346_C	993346	110	A	C	1798	Rv0891c		GTT/GGT	37	V/G	Nonsyn	Coding region
mtbs0996205_C	996205	91	T	C	805	Rv0893c		AAG/GAG	31	K/E	Nonsyn	Coding region
mtbs0996346_A	996346	996346	G	A	708
mtbs0998108_A	998108	327	G	A	38	Rv0895		CTG/CTA	109	L/L	Syn	Coding region
mtbs1011511_C	1011511	1376	A	C	816	Rv0907		TAC/TCC	459	Y/S	Nonsyn	Coding region
mtbs1020942_G	1020942	388	T	G	538	Rv0915c	PPE14	AGT/CGT	130	S/R	Nonsyn	Coding region
mtbs1022003_C	1022003	1022003	A	C	723
mtbs1024346_G	1024346	136	A	G	1145	Rv0918		AGT/GGT	46	S/G	Nonsyn	Coding region
mtbs1025106_C	1025106	423	T	C	1914	Rv0919		TTT/TTC	141	F/F	Syn	Coding region
mtbs1028217_A	1028217	533	G	A	747	Rv0922		GGC/GAC	178	G/D	Nonsyn	Coding region
mtbs1034758_T	1034758	1034758	C	T	734
mtbs1037012_C	1037012	14	T	C	2007	Rv0930	pstA1	ATG/ACG	5	M/T	Nonsyn	Coding region
mtbs1037911_T	1037911	913	C	T	2048	Rv0930	pstA1	CGA/TGA	305	R/Stop	Nonsyn	Coding region
mtbs1040251_A	1040251	798	C	A	785	Rv0932c	pstS2	CCG/CCT	266	P/P	Syn	Coding region
mtbs1047165_C	1047165	1030	T	C	1762	Rv0938	ligD	TGC/CGC	344	C/R	Nonsyn	Coding region
mtbs1054784_G	1054784	538	C	G	973	Rv0945		CGC/GGC	180	R/G	Nonsyn	Coding region
mtbs1066921_T	1066921	844	G	T	534	Rv0955		GCC/TCC	282	A/S	Nonsyn	Coding region
mtbs1068151_C	1068151	591	T	C	2185	Rv0956	purN	CAT/CAC	197	H/H	Syn	Coding region
mtbs1068432_G	1068432	228	A	G	1889	Rv0957	purH	CCA/CCG	76	P/P	Syn	Coding region
mtbs1070702_C	1070702	820	T	C	1887	Rv0958		TCC/CCC	274	S/P	Nonsyn	Coding region
mtbs1071966_G	1071966	712	A	G	838	Rv0959		AAC/GAC	238	N/D	Nonsyn	Coding region
mtbs1074558_A	1074558	557	G	A	2132	Rv0962c	lprP	CCC/CTC	186	P/L	Nonsyn	Coding region
mtbs1075279_C	1075279	1075279	T	C	1721
mtbs1076309_T	1076309	370	G	T	1986	Rv0964c		CCT/ACT	124	P/T	Nonsyn	Coding region
mtbs1076689_C	1076689	1076689	A	C	758
mtbs1076880_T	1076880	318	C	T	779	Rv0965c		GCG/GCA	106	A/A	Syn	Coding region
mtbs1077312_G	1077312	524	A	G	2028	Rv0966c		GTG/GCG	175	V/A	Nonsyn	Coding region
mtbs1077626_A	1077626	210	C	A	64	Rv0966c		GGG/GGT	70	G/G	Syn	Coding region
mtbs1079927_A	1079927	1185	C	A	2133	Rv0969	ctpV	ACC/ACA	395	T/T	Syn	Coding region
mtbs1080192_A	1080192	1450	G	A	1159	Rv0969	ctpV	GAT/AAT	484	D/N	Nonsyn	Coding region
mtbs1081681_C	1081681	630	T	C	2031	Rv0970		GTT/GTC	210	V/V	Syn	Coding region
mtbs1087193_C	1087193	153	G	C	1875	Rv0974c	accD2	AAC/AAG	51	N/K	Nonsyn	Coding region
mtbs1093406_G	1093406	951	A	G	2028	Rv0978c	PE_PGRS17	GTT/GTC	317	V/V	Syn	Coding region
mtbs1093928_A	1093928	429	G	A	1418	Rv0978c	PE_PGRS17	AAC/AAT	143	N/N	Syn	Coding region
mtbs1093951_G	1093951	406	A	G	6	Rv0978c	PE_PGRS17	TGG/CGG	136	W/R	Nonsyn	Coding region
mtbs1093954_G	1093954	403	C	G	5	Rv0978c	PE_PGRS17	GGG/CGG	135	G/R	Nonsyn	Coding region
mtbs1093970_C	1093970	387	T	C	44	Rv0978c	PE_PGRS17	CAA/CAG	129	Q/Q	Syn	Coding region
mtbs1093982_G	1093981	375	C	G	1	Rv0978c	PE_PGRS17	GGG/CGG	126	G/R	Nonsyn	Coding region
mtbs1093983_G	1093983	374	T	G	15	Rv0978c	PE_PGRS17	GAC/GCC	125	D/A	Nonsyn	Coding region
mtbs1093987_C	1093987	370	T	C	8	Rv0978c	PE_PGRS17	ATC/GTC	124	I/V	Nonsyn	Coding region
mtbs1093993_G	1093993	364	T	G	22	Rv0978c	PE_PGRS17	AAC/CAC	122	N/H	Nonsyn	Coding region
mtbs1093994_G	1093994	363	C	G	25	Rv0978c	PE_PGRS17	GCG/GCC	121	A/A	Syn	Coding region
mtbs1094003_A	1094003	354	G	A	29	Rv0978c	PE_PGRS17	GGC/GGT	118	G/G	Syn	Coding region
mtbs1094021_C	1094021	336	G	C	21	Rv0978c	PE_PGRS17	ACC/ACG	112	T/T	Syn	Coding region
mtbs1094022_A	1094022	335	G	A	20	Rv0978c	PE_PGRS17	ACC/ATC	112	T/I	Nonsyn	Coding region
mtbs1094023_C	1094023	334	T	C	22	Rv0978c	PE_PGRS17	ACC/GCC	112	T/A	Nonsyn	Coding region
mtbs1094029_C	1094029	328	A	C	25	Rv0978c	PE_PGRS17	TCG/GCG	110	S/A	Nonsyn	Coding region
mtbs1094032_C	1094032	325	G	C	23	Rv0978c	PE_PGRS17	CAG/GAG	109	Q/E	Nonsyn	Coding region
mtbs1094063_G	1094062	294	T	G	1	Rv0978c	PE_PGRS17	AAC/CAC	99	N/H	Nonsyn	Coding region
mtbs1095644_T	1095644	808	C	T	1126	Rv0980c	PE_PGRS18	GCG/ACG	270	A/T	Nonsyn	Coding region
mtbs1095678_G	1095678	774	A	G	1004	Rv0980c	PE_PGRS18	GGT/GGC	258	G/G	Syn	Coding region
mtbs1096205_C	1096205	247	T	C	231	Rv0980c	PE_PGRS18	AGC/GGC	83	S/G	Nonsyn	Coding region
mtbs1096235_G	1096235	217	C	G	173	Rv0980c	PE_PGRS18	GAA/CAA	73	E/Q	Nonsyn	Coding region
mtbs1096239_A	1096239	213	G	A	155	Rv0980c	PE_PGRS18	TAC/TAT	71	Y/Y	Syn	Coding region
mtbs1096299_G	1096299	153	C	G	1070	Rv0980c	PE_PGRS18	GCG/GCC	51	A/A	Syn	Coding region
mtbs1096398_T	1096398	54	C	T	1542	Rv0980c	PE_PGRS18	GCG/GCA	18	A/A	Syn	Coding region
mtbs1096508_G	1096508	1096508	C	G	1383
mtbs1096510_C	1096510	1096510	T	C	1391
mtbs1096567_G	1096567	1096567	A	G	993
mtbs1096633_G	1096633	1096633	T	G	1794
mtbs1097220_T	1097220	399	C	T	904	Rv0981	mprA	TCC/TCT	133	S/S	Syn	Coding region
mtbs1097442_T	1097442	621	C	T	770	Rv0981	mprA	GAC/GAT	207	D/D	Syn	Coding region
mtbs1098523_A	1098523	1016	T	A	998	Rv0982	mprB	CTT/CAT	339	L/H	Nonsyn	Coding region
mtbs1099058_A	1099058	1099058	G	A	813
mtbs1100234_C	1100234	1169	T	C	1937	Rv0983	pepD	CTG/CCG	390	L/P	Nonsyn	Coding region
mtbs1102117_A	1102117	315	G	A	743	Rv0986		GTG/GTA	105	V/V	Syn	Coding region
mtbs1102468_A	1102468	666	C	A	781	Rv0986		GGC/GGA	222	G/G	Syn	Coding region
mtbs1102646_A	1102646	105	G	A	756	Rv0987		GCG/GCA	35	A/A	Syn	Coding region
mtbs1103656_T	1103656	1115	C	T	734	Rv0987		GCC/GTC	372	A/V	Nonsyn	Coding region
mtbs1104690_G	1104690	2149	T	G	932	Rv0987		TTC/GTC	717	F/V	Nonsyn	Coding region
mtbs1105686_G	1105686	571	C	G	714	Rv0988		CTG/GTG	191	L/V	Nonsyn	Coding region
mtbs1105687_C	1105687	572	T	C	715	Rv0988		CTG/CCG	191	L/P	Nonsyn	Coding region
mtbs1106422_C	1106422	961	T	C	1708	Rv0989c	grcC2	ATA/GTA	321	I/V	Nonsyn	Coding region
mtbs1107940_C	1107940	160	A	C	1038	Rv0990c		TCC/GCC	54	S/A	Nonsyn	Coding region
mtbs1108521_A	1108521	1108521	G	A	709
mtbs1109975_G	1109975	704	A	G	1920	Rv0993	galU	CAG/CGG	235	Q/R	Nonsyn	Coding region
mtbs1111678_A	1111678	67	G	A	801	Rv0995	rimJ	GGC/AGC	23	G/S	Nonsyn	Coding region
mtbs1126889_C	1126889	115	G	C	2001	Rv1007c	metS	CGC/GGC	39	R/G	Nonsyn	Coding region
mtbs1127493_C	1127493	405	T	C	773	Rv1008	tatD	AAT/AAC	135	N/N	Syn	Coding region
mtbs1127648_A	1127648	560	C	A	2003	Rv1008	tatD	ACC/AAC	187	T/N	Nonsyn	Coding region
mtbs1144585_G	1144585	22	A	G	993	Rv1023	eno	AGG/GGG	8	R/G	Nonsyn	Coding region
mtbs1145848_C	1145848	1285	A	C	797	Rv1023	eno	AAA/CAA	429	K/Q	Nonsyn	Coding region
mtbs1148259_G	1148259	1148259	A	G	966
mtbs1148930_T	1148930	178	C	T	760	Rv1027c	kdpE	GGT/AGT	60	G/S	Nonsyn	Coding region
mtbs1149551_T	1149551	2136	C	T	1819	Rv1028c	kdpD	GAG/GAA	712	E/E	Syn	Coding region
mtbs1150585_A	1150585	1102	G	A	2193	Rv1028c	kdpD	CCC/TCC	368	P/S	Nonsyn	Coding region
mtbs1151054_G	1151054	633	C	G	865	Rv1028c	kdpD	TCG/TCC	211	S/S	Syn	Coding region
mtbs1151304_A	1151304	383	C	A	690	Rv1028c	kdpD	CGC/CTC	128	R/L	Nonsyn	Coding region
mtbs1152701_T	1152701	690	C	T	65	Rv1029	kdpA	ATC/ATT	230	I/I	Syn	Coding region
mtbs1159808_T	1159808	254	C	T	63	Rv1035c		CGG/CAG	85	R/Q	Nonsyn	Coding region
mtbs1160770_A	1160770	59	T	A	917	Rv1037c	esxI	CAG/CTG	20	Q/L	Nonsyn	Coding region
mtbs1163134_C	1163134	243	T	C	1908	Rv1040c	PE8	GGA/GGG	81	G/G	Syn	Coding region
mtbs1164336_A	1164336	1164336	G	A	1129
mtbs1165114_T	1165114	322	C	T	245	Rv1041c		GAT/AAT	108	D/N	Nonsyn	Coding region
mtbs1168776_G	1168776	453	T	G	792	Rv1046c		AGA/AGC	151	R/S	Nonsyn	Coding region
mtbs1172085_A	1172085	69	C	A	735	Rv1048c		GAG/GAT	23	E/D	Nonsyn	Coding region
mtbs1173750_T	1173750	870	G	T	926	Rv1050		GCG/GCT	290	A/A	Syn	Coding region
mtbs1175343_T	1175343	1175343	C	T	768
mtbs1177157_A	1177157	230	G	A	715	Rv1054		GGC/GAC	77	G/D	Nonsyn	Coding region
mtbs1178116_C	1178116	489	T	C	1771	Rv1056		ACT/ACC	163	T/T	Syn	Coding region
mtbs1190093_C	1190093	332	A	C	1835	Rv1067c	PE_PGRS19	TTG/TGG	111	L/W	Nonsyn	Coding region
mtbs1191741_A	1191741	408	G	A	1258	Rv1068c	PE_PGRS20	TAC/TAT	136	Y/Y	Syn	Coding region
mtbs1197157_G	1197157	1197157	T	G	738
mtbs1200418_G	1200418	1200418	A	G	1695
mtbs1201581_C	1201581	815	A	C	818	Rv1076	lipU	CAG/CCG	272	Q/P	Nonsyn	Coding region
mtbs1208181_A	1208181	546	G	A	66	Rv1084		CTG/CTA	182	L/L	Syn	Coding region
mtbs1211369_C	1211369	775	A	C	1011	Rv1086		AGC/CGC	259	S/R	Nonsyn	Coding region
mtbs1212432_A	1212432	873	C	A	836	Rv1087	PE_PGRS21	GGC/GGA	291	G/G	Syn	Coding region
mtbs1215742_A	1215742	144	G	A	749	Rv1090	celA2b	CAG/CAA	48	Q/Q	Syn	Coding region
mtbs1215743_A	1215743	145	C	A	748	Rv1090	celA2b	CAG/AAG	49	Q/K	Nonsyn	Coding region
mtbs1217065_A	1217065	597	C	A	852	Rv1091	PE_PGRS22	GCC/GCA	199	A/A	Syn	Coding region
mtbs1217157_C	1217157	689	A	C	868	Rv1091	PE_PGRS22	GAC/GCC	230	D/A	Nonsyn	Coding region
mtbs1218658_C	1218658	2190	G	C	867	Rv1091	PE_PGRS22	GGG/GGC	730	G/G	Syn	Coding region
mtbs1218896_A	1218896	2428	G	A	844	Rv1091	PE_PGRS22	GGC/AGC	810	G/S	Nonsyn	Coding region
mtbs1220680_C	1220680	107	T	C	1955	Rv1093	glyA1	GTA/GCA	36	V/A	Nonsyn	Coding region
mtbs1224367_C	1224367	1224367	T	C	2137
mtbs1227830_T	1227830	855	G	T	870	Rv1099c	glpX	ACC/ACA	285	T/T	Syn	Coding region
mtbs1230778_A	1230778	194	G	A	943	Rv1102c	mazF3	ACC/ATC	65	T/I	Nonsyn	Coding region
mtbs1234971_T	1234971	490	C	T	50	Rv1108c	xseA	GCG/ACG	164	A/T	Nonsyn	Coding region
mtbs1248382_G	1248382	301	A	G	1056	Rv1125		AGC/GGC	101	S/G	Nonsyn	Coding region
mtbs1248936_C	1248936	855	G	C	1107	Rv1125		CCG/CCC	285	P/P	Syn	Coding region
mtbs1248978_C	1248978	897	T	C	2037	Rv1125		GCT/GCC	299	A/A	Syn	Coding region
mtbs1250340_G	1250340	1065	A	G	1022	Rv1127c	ppdK	GCT/GCC	355	A/A	Syn	Coding region
mtbs1251199_T	1251199	206	C	T	1235	Rv1127c	ppdK	GGA/GAA	69	G/E	Nonsyn	Coding region
mtbs1252164_C	1252164	544	T	C	1229			TCG/CCG	182	S/P	Nonsyn	Repeat region
mtbs1254562_G	1254562	8	A	G	930	Rv1130	prpD	GAT/GGT	3	D/G	Nonsyn	Coding region
mtbs1265070_T	1265070	1265070	G	T	732
mtbs1275957_C	1275957	1275957	T	C	1217
mtbs1276588_G	1276588	293	C	G	970			TCG/TGG	98	S/W	Nonsyn	Repeat region
mtbs1276842_A	1276842	547	G	A	732			GGC/AGC	183	G/S	Nonsyn	Repeat region
mtbs1276843_C	1276843	548	G	C	724			GGC/GCC	183	G/A	Nonsyn	Repeat region
mtbs1276846_G	1276846	551	C	G	727			CCC/CGC	184	P/R	Nonsyn	Repeat region
mtbs1276853_C	1276853	558	G	C	716			GCG/GCC	186	A/A	Syn	Repeat region
mtbs1276863_C	1276863	568	A	C	53			ACG/CCG	190	T/P	Nonsyn	Repeat region
mtbs1276873_G	1276873	578	A	G	363			GAT/GGT	193	D/G	Nonsyn	Repeat region
mtbs1276875_G	1276875	580	T	G	353			TGC/GGC	194	C/G	Nonsyn	Repeat region
mtbs1276876_T	1276876	581	G	T	360			TGC/TTC	194	C/F	Nonsyn	Repeat region
mtbs1276882_G	1276882	587	C	G	597			GCG/GGG	196	A/G	Nonsyn	Repeat region
mtbs1276885_T	1276885	590	C	T	611			CCT/CTT	197	P/L	Nonsyn	Repeat region
mtbs1278278_A	1278278	10	G	A	288	Rv1150		GAT/AAT	4	D/N	Nonsyn	Miscellaneous feature
mtbs1281118_C	1281118	367	T	C	1925	Rv1154c		ACG/GCG	123	T/A	Nonsyn	Coding region
mtbs1281771_C	1281771	343	T	C	1022	Rv1155		TCG/CCG	115	S/P	Nonsyn	Coding region
mtbs1285001_C	1285001	10	A	C	821	Rv1159	pimE	ACC/CCC	4	T/P	Nonsyn	Coding region
mtbs1286766_C	1286766	172	G	C	761	Rv1160	mutT2	GGA/CGA	58	G/R	Nonsyn	Coding region
mtbs1288698_A	1288698	1371	G	A	769	Rv1161	narG	GGG/GGA	457	G/G	Syn	Coding region
mtbs1292102_G	1292102	1038	A	G	2088	Rv1162	narH	CCA/CCG	346	P/P	Syn	Coding region
mtbs1293333_G	1293333	536	C	G	797	Rv1163	narJ	CCG/CGG	179	P/R	Nonsyn	Coding region
mtbs1296834_C	1296834	683	A	C	65	Rv1166	lpqW	GAA/GCA	228	E/A	Nonsyn	Coding region
mtbs1299305_A	1299305	500	G	A	875	Rv1168c	PPE17	CCG/CTG	167	P/L	Nonsyn	Coding region
mtbs1306259_G	1306259	1968	A	G	1380	Rv1175c	fadH	GCT/GCC	656	A/A	Syn	Coding region
mtbs1307598_G	1307598	629	C	G	1892	Rv1175c	fadH	TGC/TCC	210	C/S	Nonsyn	Coding region
mtbs1313338_C	1313338	1313338	A	C	228
mtbs1315191_C	1315191	1467	A	C	2090	Rv1180	pks3	TAA/TAC	489	Stop/Y	Nonsyn	Coding region
mtbs1315884_A	1315884	651	G	A	2123	Rv1181	pks4	GCG/GCA	217	A/A	Syn	Coding region
mtbs1317655_T	1317655	2422	C	T	782	Rv1181	pks4	CTG/TTG	808	L/L	Syn	Coding region
mtbs1322741_G	1322741	1222	A	G	758	Rv1183	mmpL10	ACT/GCT	408	T/A	Nonsyn	Coding region
mtbs1327890_A	1327890	1416	G	A	1929	Rv1186c		GAC/GAT	472	D/D	Syn	Coding region
mtbs1328687_C	1328687	619	G	C	2128	Rv1186c		CCC/GCC	207	P/A	Nonsyn	Coding region
mtbs1329234_A	1329234	72	G	A	902	Rv1186c		GAC/GAT	24	D/D	Syn	Coding region
mtbs1333669_G	1333669	690	T	G	731	Rv1190		GGT/GGG	230	G/G	Syn	Coding region
mtbs1336164_T	1336164	371	C	T	773	Rv1193	fadD36	CCG/CTG	124	P/L	Nonsyn	Coding region
mtbs1340208_A	1340208	860	G	A	914	Rv1196	PPE18	CGG/CAG	287	R/Q	Nonsyn	Coding region
mtbs1342581_C	1342581	25	T	C	1033	Rv1199c		ACC/GCC	9	T/A	Nonsyn	Coding region
mtbs1349733_C	1349733	402	G	C	780	Rv1206	fadD6	GAG/GAC	134	E/D	Nonsyn	Coding region
mtbs1351172_G	1351172	1351172	A	G	988
mtbs1357308_G	1357308	318	T	G	888	Rv1214c	PE14	GCA/GCC	106	A/A	Syn	Coding region
mtbs1360209_C	1360209	1593	T	C	1988	Rv1217c		GCA/GCG	531	A/A	Syn	Coding region
mtbs1361190_A	1361190	612	G	A	973	Rv1217c		AGC/AGT	204	S/S	Syn	Coding region
mtbs1361285_T	1361285	517	C	T	812	Rv1217c		GCT/ACT	173	A/T	Nonsyn	Coding region
mtbs1362006_C	1362006	728	T	C	1203	Rv1218c		CAA/CGA	243	Q/R	Nonsyn	Coding region
mtbs1364706_A	1364706	294	G	A	537	Rv1221	sigE	CTG/CTA	98	L/L	Syn	Coding region
mtbs1367484_G	1367484	22	T	G	961	Rv1224	tatB	TGG/GGG	8	W/G	Nonsyn	Coding region
mtbs1370852_G	1370852	1370852	T	G	733
mtbs1374065_C	1374065	133	T	C	2249	Rv1230c		AGC/GGC	45	S/G	Nonsyn	Coding region
mtbs1374201_G	1374201	1374201	A	G	735
mtbs1375044_G	1375044	1125	C	G	864	Rv1232c		GCG/GCC	375	A/A	Syn	Coding region
mtbs1375724_C	1375724	445	A	C	2158	Rv1232c		TGC/GGC	149	C/G	Nonsyn	Coding region
mtbs1382628_C	1382628	415	T	C	1906	Rv1239c	corA	AAA/GAA	139	K/E	Nonsyn	Coding region
mtbs1390763_T	1390763	2290	C	T	967	Rv1248c		GTG/ATG	764	V/M	Nonsyn	Coding region
mtbs1393626_G	1393626	357	A	G	2073	Rv1249c		CTT/CTC	119	L/L	Syn	Coding region
mtbs1396922_C	1396922	2319	T	C	2051	Rv1251c		ACA/ACG	773	T/T	Syn	Coding region
mtbs1411210_G	1411210	780	T	G	2151	Rv1263	amiB2	GTT/GTG	260	V/V	Syn	Coding region
mtbs1413148_T	1413148	77	C	T	2029	RVnc0013	mcr11	GGC/GAC	26	G/D	Nonsyn	Non-coding RNA
mtbs1414021_T	1414021	1820	C	T	2008	Rv1266c	pknH	CGG/CAG	607	R/Q	Nonsyn	Coding region
mtbs1431097_T	1431097	1036	G	T	76	Rv1279		GAA/TAA	346	E/Stop	Nonsyn	Coding region
mtbs1440469_G	1440469	1563	C	G	1998	Rv1286	cysN	CCC/CCG	521	P/P	Syn	Coding region
mtbs1445781_G	1445781	54	A	G	1869	Rv1291c		GCT/GCC	18	A/A	Syn	Coding region
mtbs1446733_A	1446733	355	G	A	706	Rv1292	argS	GCC/ACC	119	A/T	Nonsyn	Coding region
mtbs1457144_T	1457144	580	C	T	2021	Rv1300	hemK	CGC/TGC	194	R/C	Nonsyn	Coding region
mtbs1465702_A	1465702	819	G	A	1	Rv1309	atpG	AAG/AAA	273	K/K	Syn	Coding region
mtbs1468208_C	1468208	1298	A	C	1696	Rv1313c		CTG/CGG	433	L/R	Nonsyn	Coding region
mtbs1468459_G	1468459	1047	A	G	152	Rv1313c		GGT/GGC	349	G/G	Syn	Coding region
mtbs1468492_A	1468492	1014	C	A	611	Rv1313c		CTG/CTT	338	L/L	Syn	Coding region
mtbs1471659_T	1471659	41	C	T	1948	RVnc0021	mcr3	TCG/TTG	14	S/L	Nonsyn	Non-coding RNA
mtbs1477596_T	1477596	36	C	T	732	Rv1316c	ogt	GGG/GGA	12	G/G	Syn	Coding region
mtbs1479085_C	1479085	34	T	C	1032	Rv1317c	alkA	ATC/GTC	12	I/V	Nonsyn	Coding region
mtbs1480972_C	1480972	1530	T	C	1209	Rv1319c		GAA/GAG	510	E/E	Syn	Coding region
mtbs1482627_C	1482627	1591	T	C	2117	Rv1320c		ACG/GCG	531	T/A	Nonsyn	Coding region
mtbs1484708_C	1484708	430	A	C	2014	Rv1321		AGC/CGC	144	S/R	Nonsyn	Coding region
mtbs1490905_G	1490905	1408	A	G	978	Rv1326c	glgB	TCT/CCT	470	S/P	Nonsyn	Coding region
mtbs1498951_T	1498951	239	G	T	879	Rv1329c	dinG	ACG/AAG	80	T/K	Nonsyn	Coding region
mtbs1499274_G	1499274	1286	C	G	2192	Rv1330c	pncB1	GGC/GCC	429	G/A	Nonsyn	Coding region
mtbs1501700_A	1501700	102	G	A	969	Rv1333		GTG/GTA	34	V/V	Syn	Coding region
mtbs1523817_T	1523817	216	C	T	707	Rv1355c	moeY	CGG/CGA	72	R/R	Syn	Coding region
mtbs1526311_T	1526311	1526311	G	T	710
mtbs1526819_A	1526819	208	C	A	1722	Rv1358		CGG/AGG	70	R/R	Syn	Coding region
mtbs1533241_C	1533241	393	G	C	1685	Rv1361c	PPE19	ACC/ACG	131	T/T	Syn	Coding region
mtbs1533583_A	1533583	51	G	A	1739	Rv1361c	PPE19	TAC/TAT	17	Y/Y	Syn	Coding region
mtbs1536251_T	1536251	1394	G	T	2058	Rv1364c		GCG/GAG	465	A/E	Nonsyn	Coding region
mtbs1540141_C	1540141	505	T	C	995	Rv1367c		ATC/GTC	169	I/V	Nonsyn	Coding region
mtbs1541798_T	1541798	779	C	T	916	Rv1368	lprF	GCG/GTG	260	A/V	Nonsyn	Coding region
mtbs1544255_T	1544255	897	C	T	986	Rv1371		CGC/CGT	299	R/R	Syn	Coding region
mtbs1546703_T	1546703	692	C	T	1134	Rv1373		CCG/CTG	231	P/L	Nonsyn	Coding region
mtbs1547125_C	1547125	406	T	C	1841	Rv1374c		ACA/GCA	136	T/A	Nonsyn	Coding region
mtbs1552547_A	1552547	109	G	A	2066	Rv1378c		CGG/TGG	37	R/W	Nonsyn	Coding region
mtbs1556787_C	1556787	817	T	C	791	Rv1383	carA	TCG/CCG	273	S/P	Nonsyn	Coding region
mtbs1561939_C	1561939	171	G	C	878	Rv1387	PPE20	GAG/GAC	57	E/D	Nonsyn	Coding region
mtbs1563717_T	1563717	24	C	T	1767	Rv1388	mihF	GTC/GTT	8	V/V	Syn	Coding region
mtbs1570566_A	1570566	404	C	A	1813	Rv1394c	cyp132	CGG/CTG	135	R/L	Nonsyn	Coding region
mtbs1573660_G	1573660	198	T	G	1926	Rv1396c	PE_PGRS25	AGA/AGC	66	R/S	Nonsyn	Coding region
mtbs1576481_G	1576481	316	T	G	792	Rv1400c	lipI	ACC/CCC	106	T/P	Nonsyn	Coding region
mtbs1576527_T	1576527	270	G	T	795	Rv1400c	lipI	TTC/TTA	90	F/L	Nonsyn	Coding region
mtbs1577241_A	1577241	312	G	A	841	Rv1401		CCG/CCA	104	P/P	Syn	Coding region
mtbs1588899_T	1588899	333	G	T	1926	Rv1412	ribC	GCG/GCT	111	A/A	Syn	Coding region
mtbs1593331_A	1593331	1593331	G	A	849
mtbs1594906_A	1594906	865	G	A	801	Rv1420	uvrC	GTC/ATC	289	V/I	Nonsyn	Coding region
mtbs1595342_C	1595342	1301	T	C	956	Rv1420	uvrC	GTG/GCG	434	V/A	Nonsyn	Coding region
mtbs1606673_T	1606673	288	G	T	815	Rv1430	PE16	GCG/GCT	96	A/A	Syn	Coding region
mtbs1608276_C	1608276	194	A	C	968	Rv1431		AAC/ACC	65	N/T	Nonsyn	Coding region
mtbs1609840_G	1609840	1758	A	G	1982	Rv1431		CCA/CCG	586	P/P	Syn	Coding region
mtbs1613035_C	1613035	1613035	T	C	1881
mtbs1616061_T	1616061	498	C	T	803	Rv1438	tpi	AGC/AGT	166	S/S	Syn	Coding region
mtbs1617302_T	1617302	85	G	T	765	Rv1439c		CTT/ATT	29	L/I	Nonsyn	Coding region
mtbs1618978_C	1618978	707	T	C	1061	Rv1441c	PE_PGRS26	GAT/GGT	236	D/G	Nonsyn	Coding region
mtbs1620181_G	1620181	391	C	G	833	Rv1442	bisC	CTC/GTC	131	L/V	Nonsyn	Coding region
mtbs1624791_G	1624791	575	C	G	2098	Rv1446c	opcA	CGA/CCA	192	R/P	Nonsyn	Coding region
mtbs1627351_C	1627351	730	T	C	1320	Rv1448c	tal	ACC/GCC	244	T/A	Nonsyn	Coding region
mtbs1630148_C	1630148	52	A	C	1796	Rv1449c	tkt	TAC/GAC	18	Y/D	Nonsyn	Coding region
mtbs1634418_T	1634418	210	C	T	727	Rv1450c	PE_PGRS27	GCG/GCA	70	A/A	Syn	Coding region
mtbs1634580_C	1634580	48	T	C	978	Rv1450c	PE_PGRS27	TTA/TTG	16	L/L	Syn	Coding region
mtbs1634581_G	1634581	47	A	G	976	Rv1450c	PE_PGRS27	TTA/TCA	16	L/S	Nonsyn	Coding region
mtbs1634586_C	1634586	42	T	C	986	Rv1450c	PE_PGRS27	GCA/GCG	14	A/A	Syn	Coding region
mtbs1634589_C	1634589	39	G	C	975	Rv1450c	PE_PGRS27	GCC/GCG	13	A/A	Syn	Coding region
mtbs1634592_G	1634592	36	C	G	978	Rv1450c	PE_PGRS27	GCG/GCC	12	A/A	Syn	Coding region
mtbs1634609_T	1634609	19	C	T	1181	Rv1450c	PE_PGRS27	GCC/ACC	7	A/T	Nonsyn	Coding region
mtbs1634610_T	1634610	18	C	T	1187	Rv1450c	PE_PGRS27	GTG/GTA	6	V/V	Syn	Coding region
mtbs1636826_A	1636826	1404	C	A	1831	Rv1452c	PE_PGRS28	GGG/GGT	468	G/G	Syn	Coding region
mtbs1636918_T	1636918	1312	C	T	1455	Rv1452c	PE_PGRS28	GCC/ACC	438	A/T	Nonsyn	Coding region
mtbs1636927_T	1636927	1303	C	T	979	Rv1452c	PE_PGRS28	GAC/AAC	435	D/N	Nonsyn	Coding region
mtbs1636928_G	1636928	1302	A	G	1018	Rv1452c	PE_PGRS28	GGT/GGC	434	G/G	Syn	Coding region
mtbs1636934_G	1636934	1296	A	G	1025	Rv1452c	PE_PGRS28	CAT/CAC	432	H/H	Syn	Coding region
mtbs1636936_T	1636936	1294	G	T	994	Rv1452c	PE_PGRS28	CAT/AAT	432	H/N	Nonsyn	Coding region
mtbs1636944_T	1636944	1286	G	T	1027	Rv1452c	PE_PGRS28	GCC/GAC	429	A/D	Nonsyn	Coding region
mtbs1636945_G	1636945	1285	C	G	1038	Rv1452c	PE_PGRS28	GCC/CCC	429	A/P	Nonsyn	Coding region
mtbs1636946_A	1636946	1284	C	A	856	Rv1452c	PE_PGRS28	GGG/GGT	428	G/G	Syn	Coding region
mtbs1638364_T	1638364	29	C	T	756			CGA/CAA	10	R/Q	Nonsyn	Repeat region
mtbs1639594_A	1639594	1214	C	A	2064	Rv1453		CCA/CAA	405	P/Q	Nonsyn	Coding region
mtbs1643864_C	1643864	397	T	C	851	Rv1458c		ACC/GCC	133	T/A	Nonsyn	Coding region
mtbs1645802_C	1645802	337	T	C	1903	Rv1459c		AAA/GAA	113	K/E	Nonsyn	Coding region
mtbs1647436_A	1647436	448	G	A	748	Rv1461		GTA/ATA	150	V/I	Nonsyn	Coding region
mtbs1650072_G	1650072	547	A	G	2086	Rv1462		AAC/GAC	183	N/D	Nonsyn	Coding region
mtbs1651308_G	1651308	593	A	G	761	Rv1463		GAA/GGA	198	E/G	Nonsyn	Coding region
mtbs1654730_G	1654730	773	T	G	530	Rv1467c	fadE15	AAG/ACG	258	K/T	Nonsyn	Coding region
mtbs1669158_C	1669158	1669158	T	C	740
mtbs1676290_A	1676290	594	C	A	1782	Rv1486c		AAG/AAT	198	K/N	Nonsyn	Coding region
mtbs1678706_C	1678706	155	A	C	803	Rv1489		AAG/ACG	52	K/T	Nonsyn	Coding region
mtbs1688064_G	1688064	124	A	G	832	Rv1497	lipL	ATG/GTG	42	M/V	Nonsyn	Coding region
mtbs1688300_C	1688300	360	T	C	1156	Rv1497	lipL	TTT/TTC	120	F/F	Syn	Coding region
mtbs1689349_T	1689349	572	C	T	1788	Rv1498c		CGC/CAC	191	R/H	Nonsyn	Coding region
mtbs1692141_C	1692141	252	A	C	1689	Rv1501		ATA/ATC	84	I/I	Syn	Coding region
mtbs1693561_G	1693561	638	A	G	1721	Rv1502		TAC/TGC	213	Y/C	Nonsyn	Coding region
mtbs1695037_A	1695037	108	G	A	750	Rv1504c		TTC/TTT	36	F/F	Syn	Coding region
mtbs1695796_T	1695796	151	C	T	750	Rv1505c		GCC/ACC	51	A/T	Nonsyn	Coding region
mtbs1697896_T	1697896	1697896	C	T	715
mtbs1698911_A	1698911	984	G	A	1917	Rv1508c		GGC/GGT	328	G/G	Syn	Coding region
mtbs1699849_A	1699849	46	G	A	960	Rv1508c		CCG/TCG	16	P/S	Nonsyn	Coding region
mtbs1701215_T	1701215	1701215	C	T	737
mtbs1706119_C	1706119	477	T	C	1927	Rv1514c		TCA/TCG	159	S/S	Syn	Coding region
mtbs1706685_A	1706685	842	C	A	742	Rv1515c		GGA/GTA	281	G/V	Nonsyn	Coding region
mtbs1709432_T	1709432	562	C	T	1216	Rv1517		CTC/TTC	188	L/F	Nonsyn	Coding region
mtbs1711670_T	1711670	643	C	T	751	Rv1520		CGC/TGC	215	R/C	Nonsyn	Coding region
mtbs1713192_G	1713192	891	A	G	1322	Rv1521	fadD25	GTA/GTG	297	V/V	Syn	Coding region
mtbs1716472_G	1716472	1141	A	G	1046	Rv1522c	mmpL12	TCC/CCC	381	S/P	Nonsyn	Coding region
mtbs1722200_G	1722200	6210	C	G	801	Rv1527c	pks5	GTG/GTC	2070	V/V	Syn	Coding region
mtbs1722228_C	1722228	6182	A	C	680	Rv1527c	pks5	CTG/CGG	2061	L/R	Nonsyn	Coding region
mtbs1728603_T	1728603	1728603	C	T	526
mtbs1728837_G	1728837	1728837	A	G	1819
mtbs1733134_T	1733134	417	C	T	747	Rv1532c		CAG/CAA	139	Q/Q	Syn	Coding region
mtbs1733325_G	1733325	226	C	G	796	Rv1532c		GCT/CCT	76	A/P	Nonsyn	Coding region
mtbs1739559_C	1739559	3041	T	C	533	Rv1536	ileS	ATC/ACC	1014	I/T	Nonsyn	Coding region
mtbs1741352_T	1741352	841	C	T	835	Rv1538c	ansA	GGC/AGC	281	G/S	Nonsyn	Coding region
mtbs1752561_C	1752561	773	T	C	1850	Rv1548c	PPE21	GAC/GGC	258	D/G	Nonsyn	Coding region
mtbs1753483_C	1753483	1753483	T	C	527
mtbs1759252_T	1759252	1572	G	T	1860	Rv1552	frdA	TCG/TCT	524	S/S	Syn	Coding region
mtbs1760292_G	1760292	118	A	G	1910	Rv1554	frdC	ATG/GTG	40	M/V	Nonsyn	Coding region
mtbs1774659_T	1774659	1774659	C	T	723
mtbs1778430_C	1778430	572	T	C	2287	Rv1570	bioD	ATG/ACG	191	M/T	Nonsyn	Coding region
mtbs1789446_T	1789446	366	C	T	255			ACG/ACA	122	T/T	Syn	Repeat region
mtbs1789564_T	1789564	248	C	T	1222			GGC/GAC	83	G/D	Nonsyn	Repeat region
mtbs1789565_A	1789565	247	C	A	1233			GGC/TGC	83	G/C	Nonsyn	Repeat region
mtbs1789650_T	1789650	162	C	T	1304			ACG/ACA	54	T/T	Syn	Repeat region
mtbs1789654_G	1789654	158	A	G	1309			TTG/TCG	53	L/S	Nonsyn	Repeat region
mtbs1789671_T	1789671	141	C	T	1373			ACG/ACA	47	T/T	Syn	Repeat region
mtbs1789675_C	1789675	137	A	C	1377			GTC/GGC	46	V/G	Nonsyn	Repeat region
mtbs1789678_G	1789678	134	C	G	1320			TGG/TCG	45	W/S	Nonsyn	Repeat region
mtbs1792777_C	1792777	964	T	C	1222	Rv1592c		ATT/GTT	322	I/V	Nonsyn	Coding region
mtbs1792778_C	1792778	963	T	C	1222	Rv1592c		GAA/GAG	321	E/E	Syn	Coding region
mtbs1798355_A	1798355	62	G	A	1930	Rv1597		GGT/GAT	21	G/D	Nonsyn	Coding region
mtbs1803265_A	1803265	602	G	A	1972	Rv1602	hisH	AGC/AAC	201	S/N	Nonsyn	Coding region
mtbs1804409_A	1804409	371	C	A	1955	Rv1604	impA	CCA/CAA	124	P/Q	Nonsyn	Coding region
mtbs1811375_T	1811375	249	G	T	856	Rv1612	trpB	GGG/GGT	83	G/G	Syn	Coding region
mtbs1817976_T	1817976	362	A	T	2169	Rv1618	tesB1	CAC/CTC	121	H/L	Nonsyn	Coding region
mtbs1831220_C	1831220	556	A	C	778	Rv1629	polA	ACC/CCC	186	T/P	Nonsyn	Coding region
mtbs1831226_G	1831226	562	A	G	786	Rv1629	polA	AGG/GGG	188	R/G	Nonsyn	Coding region
mtbs1831288_T	1831288	624	C	T	787	Rv1629	polA	CCC/CCT	208	P/P	Syn	Coding region
mtbs1834177_C	1834177	636	A	C	737	Rv1630	rpsA	CGA/CGC	212	R/R	Syn	Coding region
mtbs1836286_C	1836286	1836286	G	C	2051
mtbs1839759_C	1839759	592	G	C	1054	Rv1634		GGG/CGG	198	G/R	Nonsyn	Coding region
mtbs1847919_G	1847919	540	C	G	1890	Rv1639c		ACG/ACC	180	T/T	Syn	Coding region
mtbs1849051_T	1849051	2985	C	T	766	Rv1640c	lysX	CCG/CCA	995	P/P	Syn	Coding region
mtbs1849609_C	1849609	2427	T	C	1059	Rv1640c	lysX	CGA/CGG	809	R/R	Syn	Coding region
mtbs1849934_G	1849934	2102	A	G	761	Rv1640c	lysX	ATT/ACT	701	I/T	Nonsyn	Coding region
mtbs1854300_C	1854300	695	T	C	2012	Rv1644	tsnR	CTG/CCG	232	L/P	Nonsyn	Coding region
mtbs1856777_C	1856777	4	G	C	2073	Rv1647		GCG/CCG	2	A/P	Nonsyn	Coding region
mtbs1859559_A	1859559	827	C	A	1015	Rv1649	pheS	GCC/GAC	276	A/D	Nonsyn	Coding region
mtbs1877744_C	1877744	2441	A	C	837	Rv1661	pks7	GAA/GCA	814	E/A	Nonsyn	Coding region
mtbs1885385_G	1885385	3682	T	G	752	Rv1662	pks8	TTG/GTG	1228	L/V	Nonsyn	Coding region
mtbs1885772_A	1885772	4069	G	A	2021	Rv1662	pks8	GCC/ACC	1357	A/T	Nonsyn	Coding region
mtbs1887060_G	1887060	549	C	G	535	Rv1663	pks17	ACC/ACG	183	T/T	Syn	Coding region
mtbs1888373_C	1888373	348	T	C	759	Rv1664	pks9	GCT/GCC	116	A/A	Syn	Coding region
mtbs1892017_C	1892017	792	T	C	751	Rv1665	pks11	CAT/CAC	264	H/H	Syn	Coding region
mtbs1894422_G	1894422	921	A	G	1425	Rv1668c		GAT/GAC	307	D/D	Syn	Coding region
mtbs1897608_T	1897608	600	C	T	778	Rv1672c		TTG/TTA	200	L/L	Syn	Coding region
mtbs1901493_C	1901493	447	T	C	1997	Rv1676		AGT/AGC	149	S/S	Syn	Coding region
mtbs1902337_C	1902337	1902337	A	C	725
mtbs1906078_G	1906078	829	A	G	837	Rv1681	moeX	ACC/GCC	277	T/A	Nonsyn	Coding region
mtbs1907296_C	1907296	894	G	C	1901	Rv1682		GCG/GCC	298	A/A	Syn	Coding region
mtbs1916137_G	1916137	189	A	G	1382	Rv1691		CTA/CTG	63	L/L	Syn	Coding region
mtbs1917972_G	1917972	33	A	G	2102	Rv1694	tlyA	CTA/CTG	11	L/L	Syn	Coding region
mtbs1924008_A	1924008	180	G	A	746	Rv1699	pyrG	CCG/CCA	60	P/P	Syn	Coding region
mtbs1931179_A	1931179	278	C	A	2019	Rv1704c	cycA	CGG/CTG	93	R/L	Nonsyn	Coding region
mtbs1931718_C	1931718	937	G	C	1132	Rv1705c	PPE22	CTG/GTG	313	L/V	Nonsyn	Coding region
mtbs1933988_A	1933988	1933988	G	A	1819
mtbs1944107_G	1944107	532	A	G	1891	Rv1716		AGT/GGT	178	S/G	Nonsyn	Coding region
mtbs1944402_C	1944402	827	T	C	2053	Rv1716		GTC/GCC	276	V/A	Nonsyn	Coding region
mtbs1950767_C	1950767	285	T	C	1834	Rv1724c		AAA/AAG	95	K/K	Syn	Coding region
mtbs1955941_C	1955941	1305	G	C	866	Rv1730c		GAC/GAG	435	D/E	Nonsyn	Coding region
mtbs1960284_A	1960284	204	C	A	1919	Rv1733c		CAG/CAT	68	Q/H	Nonsyn	Coding region
mtbs1961735_G	1961735	54	A	G	781	Rv1735c		GCT/GCC	18	A/A	Syn	Coding region
mtbs1967026_T	1967026	612	C	T	747	Rv1739c		GCG/GCA	204	A/A	Syn	Coding region
mtbs1967237_A	1967237	401	C	A	1918	Rv1739c		CGA/CTA	134	R/L	Nonsyn	Coding region
mtbs1967543_A	1967543	95	C	A	818	Rv1739c		GGC/GTC	32	G/V	Nonsyn	Coding region
mtbs1971725_C	1971725	267	G	C	1112	Rv1745c	idi	CGC/CGG	89	R/R	Syn	Coding region
mtbs1980652_T	1980652	1032	G	T	830	Rv1751		CCG/CCT	344	P/P	Syn	Coding region
mtbs2000234_T	2000234	161	C	T	66	Rv1767		GCG/GTG	54	A/V	Nonsyn	Coding region
mtbs2003105_T	2003105	480	C	T	811	Rv1769		TTC/TTT	160	F/F	Syn	Coding region
mtbs2003827_C	2003827	1202	A	C	886	Rv1769		GAC/GCC	401	D/A	Nonsyn	Coding region
mtbs2009848_G	2009848	677	C	G	535	Rv1775		TCC/TGC	226	S/C	Nonsyn	Coding region
mtbs2010614_A	2010614	2010614	G	A	930
mtbs2022868_C	2022868	3612	T	C	2121	Rv1783	eccC5	AGT/AGC	1204	S/S	Syn	Coding region
mtbs2023628_G	2023628	1001	C	G	848	Rv1785c	cyp143	GGA/GCA	334	G/A	Nonsyn	Coding region
mtbs2044456_G	2044456	1073	T	G	550	Rv1802	PPE30	CTG/CGG	358	L/R	Nonsyn	Coding region
mtbs2045310_G	2045310	1533	A	G	2105	Rv1803c	PE_PGRS32	ATT/ATC	511	I/I	Syn	Coding region
mtbs2048226_T	2048226	155	C	T	65	Rv1806	PE20	GCA/GTA	52	A/V	Nonsyn	Coding region
mtbs2049065_C	2049065	668	T	C	1895	Rv1807	PPE31	TTC/TCC	223	F/S	Nonsyn	Coding region
mtbs2049097_C	2049097	700	G	C	1719	Rv1807	PPE31	GTC/CTC	234	V/L	Nonsyn	Coding region
mtbs2050822_C	2050822	902	G	C	1055	Rv1808	PPE32	GGA/GCA	301	G/A	Nonsyn	Coding region
mtbs2051746_C	2051746	465	T	C	2001	Rv1809	PPE33	GCT/GCC	155	A/A	Syn	Coding region
mtbs2052035_T	2052035	754	G	T	1766	Rv1809	PPE33	GTG/TTG	252	V/L	Nonsyn	Coding region
mtbs2055271_G	2055271	89	A	G	2091	Rv1812c		CTA/CCA	30	L/P	Nonsyn	Coding region
mtbs2057774_T	2057774	247	A	T	2038	Rv1815		ATC/TTC	83	I/F	Nonsyn	Coding region
mtbs2061958_G	2061958	717	A	G	1318	Rv1818c	PE_PGRS33	GCT/GCC	239	A/A	Syn	Coding region
mtbs2062006_A	2062006	669	C	A	60	Rv1818c	PE_PGRS33	GGG/GGT	223	G/G	Syn	Coding region
mtbs2067684_A	2067684	1228	G	A	759	Rv1821	secA2	GTG/ATG	410	V/M	Nonsyn	Coding region
mtbs2069771_A	2069771	70	C	A	773	Rv1823		CAG/AAG	24	Q/K	Nonsyn	Coding region
mtbs2072313_A	2072313	362	C	A	748	Rv1826	gcvH	ACA/AAA	121	T/K	Nonsyn	Coding region
mtbs2074754_T	2074754	2074754	C	T	1235
mtbs2078246_G	2078246	2370	C	G	751	Rv1832	gcvB	GGC/GGG	790	G/G	Syn	Coding region
mtbs2082053_G	2082053	535	A	G	752	Rv1835c		TGC/CGC	179	C/R	Nonsyn	Coding region
mtbs2086672_T	2086672	310	C	T	772	Rv1837c	glcB	GGT/AGT	104	G/S	Nonsyn	Coding region
mtbs2092155_C	2092155	2092155	T	C	38
mtbs2095716_T	2095716	453	C	T	536	Rv1845c	blaR	GCG/GCA	151	A/A	Syn	Coding region
mtbs2096186_G	2096186	414	A	G	2190	Rv1846c	blaI	ACT/ACC	138	T/T	Syn	Coding region
mtbs2097270_T	2097270	394	C	T	829	Rv1847		CGG/TGG	132	R/W	Nonsyn	Coding region
mtbs2108141_C	2108141	406	T	C	2094	Rv1860	apa	TTC/CTC	136	F/L	Nonsyn	Coding region
mtbs2108890_C	2108890	2108890	A	C	1037
mtbs2112832_C	2112832	135	A	C	765	Rv1865c		GCT/GCG	45	A/A	Syn	Coding region
mtbs2116903_T	2116903	1140	C	T	2115	Rv1867		GGC/GGT	380	G/G	Syn	Coding region
mtbs2122395_T	2122395	757	C	T	874	Rv1872c	lldD2	GTG/ATG	253	V/M	Nonsyn	Coding region
mtbs2122976_G	2122976	176	C	G	1015	Rv1872c	lldD2	GGT/GCT	59	G/A	Nonsyn	Coding region
mtbs2123169_G	2123169	2123169	T	G	1850
mtbs2128870_G	2128870	849	A	G	2022	Rv1878	glnA3	CTA/CTG	283	L/L	Syn	Coding region
mtbs2135154_T	2135154	714	G	T	780	Rv1886c	fbpB	CCC/CCA	238	P/P	Syn	Coding region
mtbs2135870_C	2135870	2135870	T	C	1724
mtbs2138436_G	2138436	2138436	A	G	725
mtbs2138453_T	2138453	165	C	T	860	Rv1888A		GGG/GGA	55	G/G	Syn	Coding region
mtbs2142266_A	2142266	2142266	C	A	739
mtbs2143328_C	2143328	808	G	C	1833	Rv1895		GTG/CTG	270	V/L	Nonsyn	Coding region
mtbs2147022_C	2147022	612	A	C	1802	Rv1900c	lipJ	ATT/ATG	204	I/M	Nonsyn	Coding region
mtbs2149762_A	2149762	513	G	A	65	Rv1902c	nanT	TTC/TTT	171	F/F	Syn	Coding region
mtbs2151222_G	2151222	269	T	G	777	Rv1904		TTG/TGG	90	L/W	Nonsyn	Coding region
mtbs2154724_A	2154724	1388	C	A	963	Rv1908c	katG	CGG/CTG	463	R/L	Nonsyn	Coding region
mtbs2155168_G	2155168	944	C	G	688	Rv1908c	katG	AGC/ACC	315	S/T	Nonsyn	Coding region
mtbs2158109_C	2158109	983	T	C	1004	Rv1912c	fadB5	GAC/GGC	328	D/G	Nonsyn	Coding region
mtbs2160998_A	2160998	536	G	A	1444	Rv1915	aceAa	GGC/GAC	179	G/D	Nonsyn	Coding region
mtbs2163790_C	2163790	20	A	C	2142			CTG/CGG	7	L/R	Nonsyn	Repeat region
mtbs2165286_C	2165286	2026	A	C	1909	Rv1917c	PPE34	TCA/GCA	676	S/A	Nonsyn	Coding region
mtbs2167926_G	2167926	2687	A	G	957	Rv1918c	PPE35	TTG/TCG	896	L/S	Nonsyn	Coding region
mtbs2172380_C	2172380	758	A	C	877	Rv1920		GAG/GCG	253	E/A	Nonsyn	Coding region
mtbs2173860_C	2173860	2173860	A	C	820
mtbs2177366_T	2177366	280	C	T	757	Rv1925	fadD31	CGC/TGC	94	R/C	Nonsyn	Coding region
mtbs2179825_C	2179825	153	G	C	798	Rv1927		GAG/GAC	51	E/D	Nonsyn	Coding region
mtbs2185674_G	2185674	515	A	G	777	Rv1934c	fadE17	ATC/ACC	172	I/T	Nonsyn	Coding region
mtbs2187287_A	2187287	2187287	G	A	2
mtbs2187587_C	2187587	204	G	C	885	Rv1936		CAG/CAC	68	Q/H	Nonsyn	Coding region
mtbs2191498_T	2191498	472	G	T	800	Rv1938	ephB	GGG/TGG	158	G/W	Nonsyn	Coding region
mtbs2198786_G	2198786	279	T	G	65	Rv1948c		CCA/CCC	93	P/P	Syn	Coding region
mtbs2199052_G	2199052	13	C	G	948	Rv1948c		GGT/CGT	5	G/R	Nonsyn	Coding region
mtbs2202500_T	2202500	363	C	T	815	Rv1956	higA	CAC/CAT	121	H/H	Syn	Coding region
mtbs2209465_A	2209465	139	G	A	1097	Rv1966	mce3A	GCG/ACG	47	A/T	Nonsyn	Coding region
mtbs2211826_G	2211826	201	A	G	1812	Rv1968	mce3C	AAA/AAG	67	K/K	Syn	Coding region
mtbs2216443_A	2216443	1187	C	A	2222	Rv1971	mce3F	GCG/GAG	396	A/E	Nonsyn	Coding region
mtbs2216963_G	2216963	372	C	G	768	Rv1972		CAC/CAG	124	H/Q	Nonsyn	Coding region
mtbs2220512_G	2220512	759	T	G	1955	Rv1977		TCT/TCG	253	S/S	Syn	Coding region
mtbs2221584_C	2221584	677	G	C	874	Rv1978		AGT/ACT	226	S/T	Nonsyn	Coding region
mtbs2223293_C	2223293	2223293	T	C	1959
mtbs2225365_C	2225365	2225365	T	C	713
mtbs2228967_G	2228967	2228967	A	G	1906
mtbs2229801_G	2229801	102	C	G	1027	Rv1985c		CCG/CCC	34	P/P	Syn	Coding region
mtbs2230045_A	2230045	35	G	A	725	Rv1986		TGC/TAC	12	C/Y	Nonsyn	Coding region
mtbs2235087_A	2235087	2220	G	A	785	Rv1992c	ctpG	TTC/TTT	740	F/F	Syn	Coding region
mtbs2244421_T	2244421	718	G	T	982	Rv1999c		CTG/ATG	240	L/M	Nonsyn	Coding region
mtbs2245864_A	2245864	656	C	A	769	Rv2000		CCG/CAG	219	P/Q	Nonsyn	Coding region
mtbs2247677_C	2247677	18	A	C	1231	Rv2002	fabG3	ATA/ATC	6	I/I	Syn	Coding region
mtbs2251605_A	2251605	279	G	A	821	Rv2005c		AGC/AGT	93	S/S	Syn	Coding region
mtbs2251999_G	2251999	2251999	A	G	1924
mtbs2260100_T	2260100	2260100	C	T	940
mtbs2260525_T	2260525	83	C	T	2033			GCG/GTG	28	A/V	Nonsyn	Mobile element
mtbs2262620_A	2262620	453	T	A	186	Rv2015c		GAA/GAT	151	E/D	Nonsyn	Coding region
mtbs2262679_A	2262679	394	G	A	281	Rv2015c		CTG/TTG	132	L/L	Syn	Coding region
mtbs2262698_C	2262698	375	G	C	293	Rv2015c		GGC/GGG	125	G/G	Syn	Coding region
mtbs2262857_C	2262857	216	T	C	767	Rv2015c		TCA/TCG	72	S/S	Syn	Coding region
mtbs2264782_A	2264782	785	C	A	1907	Rv2017		GCG/GAG	262	A/E	Nonsyn	Coding region
mtbs2265059_G	2265059	2265059	T	G	1722
mtbs2266487_C	2266487	234	G	C	49	Rv2020c		CTC/CTG	78	L/L	Syn	Coding region
mtbs2266508_T	2266508	213	A	T	36	Rv2020c		GAT/GAA	71	D/E	Nonsyn	Coding region
mtbs2266517_C	2266517	204	T	C	40	Rv2020c		GAA/GAG	68	E/E	Syn	Coding region
mtbs2266550_T	2266550	171	G	T	44	Rv2020c		GGC/GGA	57	G/G	Syn	Coding region
mtbs2266553_G	2266553	168	C	G	40	Rv2020c		TCG/TCC	56	S/S	Syn	Coding region
mtbs2266583_G	2266583	138	C	G	56	Rv2020c		GAG/GAC	46	E/D	Nonsyn	Coding region
mtbs2266598_C	2266598	123	G	C	44	Rv2020c		CTC/CTG	41	L/L	Syn	Coding region
mtbs2266604_G	2266604	117	C	G	42	Rv2020c		TCG/TCC	39	S/S	Syn	Coding region
mtbs2266624_T	2266624	97	G	T	47	Rv2020c		CTA/ATA	33	L/I	Nonsyn	Coding region
mtbs2267015_C	2267015	96	T	C	774	Rv2021c		GCA/GCG	32	A/A	Syn	Coding region
mtbs2268433_A	2268433	294	C	A	720	Rv2023A		CAG/CAT	98	Q/H	Nonsyn	Miscellaneous feature
mtbs2268627_C	2268627	100	G	C	758	Rv2023A		CAA/GAA	34	Q/E	Nonsyn	Miscellaneous feature
mtbs2269545_A	2269545	696	G	A	772	Rv2024c		AGC/AGT	232	S/S	Syn	Coding region
mtbs2269780_C	2269780	461	T	C	2095	Rv2024c		GAC/GGC	154	D/G	Nonsyn	Coding region
mtbs2270102_G	2270102	139	A	G	2116	Rv2024c		TGG/CGG	47	W/R	Nonsyn	Coding region
mtbs2282787_T	2282787	935	C	T	1896	Rv2037c		TGT/TAT	312	C/Y	Nonsyn	Coding region
mtbs2283191_C	2283191	531	G	C	848	Rv2037c		GCC/GCG	177	A/A	Syn	Coding region
mtbs2285251_A	2285251	391	C	A	1822	Rv2039c		GTC/TTC	131	V/F	Nonsyn	Coding region
mtbs2287121_G	2287121	726	A	G	1863	Rv2041c		GAT/GAC	242	D/D	Syn	Coding region
mtbs2288085_C	2288085	597	G	C	743	Rv2042c		GCC/GCG	199	A/A	Syn	Coding region
mtbs2294007_C	2294007	520	T	C	786	Rv2047c		ACG/GCG	174	T/A	Nonsyn	Coding region
mtbs2295685_A	2295685	11302	C	A	627	Rv2048c	pks12	GTG/TTG	3768	V/L	Nonsyn	Coding region
mtbs2296042_C	2296042	10945	G	C	1879	Rv2048c	pks12	CCG/GCG	3649	P/A	Nonsyn	Coding region
mtbs2296181_G	2296181	10806	A	G	1069	Rv2048c	pks12	GGT/GGC	3602	G/G	Syn	Coding region
mtbs2298194_T	2298194	8793	G	T	867	Rv2048c	pks12	GCC/GCA	2931	A/A	Syn	Coding region
mtbs2300237_G	2300237	6750	A	G	2087	Rv2048c	pks12	GCT/GCC	2250	A/A	Syn	Coding region
mtbs2300546_T	2300546	6441	A	T	1837	Rv2048c	pks12	CAT/CAA	2147	H/Q	Nonsyn	Coding region
mtbs2300552_G	2300552	6435	T	G	1835	Rv2048c	pks12	CCA/CCC	2145	P/P	Syn	Coding region
mtbs2300555_G	2300555	6432	A	G	1845	Rv2048c	pks12	GAT/GAC	2144	D/D	Syn	Coding region
mtbs2302033_A	2302033	4954	G	A	1323	Rv2048c	pks12	CGC/TGC	1652	R/C	Nonsyn	Coding region
mtbs2311099_G	2311099	1419	C	G	1537	Rv2052c		CCG/CCC	473	P/P	Syn	Coding region
mtbs2314689_A	2314689	137	C	A	770	Rv2057c	rpmG1	CGT/CTT	46	R/L	Nonsyn	Coding region
mtbs2315386_A	2315386	213	C	A	767	Rv2059		CAC/CAA	71	H/Q	Nonsyn	Coding region
mtbs2316123_A	2316123	950	C	A	804	Rv2059		ACA/AAA	317	T/K	Nonsyn	Coding region
mtbs2318725_T	2318725	2029	C	T	755	Rv2062c	cobN	GAA/AAA	677	E/K	Nonsyn	Coding region
mtbs2320320_T	2320320	434	C	T	817	Rv2062c	cobN	CGT/CAT	145	R/H	Nonsyn	Coding region
mtbs2321975_C	2321975	525	T	C	829	Rv2064	cobG	GAT/GAC	175	D/D	Syn	Coding region
mtbs2328543_C	2328543	435	T	C	1084	Rv2071c	cobM	ATA/ATG	145	I/M	Nonsyn	Coding region
mtbs2329533_G	2329533	614	A	G	1991	Rv2072c	cobL	CTC/CCC	205	L/P	Nonsyn	Coding region
mtbs2331620_C	2331620	1260	A	C	1091	Rv2075c		GGT/GGG	420	G/G	Syn	Coding region
mtbs2331789_T	2331789	1091	G	T	1004	Rv2075c		CCG/CAG	364	P/Q	Nonsyn	Coding region
mtbs2334007_G	2334007	288	A	G	1768	Rv2077c		GCT/GCC	96	A/A	Syn	Coding region
mtbs2335075_G	2335075	17	A	G	1697	Rv2078		GAA/GGA	6	E/G	Nonsyn	Coding region
mtbs2335494_G	2335494	140	A	G	2015	Rv2079		TAC/TGC	47	Y/C	Nonsyn	Coding region
mtbs2337179_T	2337179	1825	C	T	762	Rv2079		CAA/TAA	609	Q/Stop	Nonsyn	Coding region
mtbs2338810_C	2338810	102	T	C	974	Rv2082		CGT/CGC	34	R/R	Syn	Coding region
mtbs2338811_G	2338811	103	A	G	974	Rv2082		AAG/GAG	35	K/E	Nonsyn	Coding region
mtbs2339255_G	2339255	547	A	G	995	Rv2082		ACT/GCT	183	T/A	Nonsyn	Coding region
mtbs2339835_T	2339835	1127	C	T	822	Rv2082		CCC/CTC	376	P/L	Nonsyn	Coding region
mtbs2340621_G	2340621	1913	C	G	2100	Rv2082		CCC/CGC	638	P/R	Nonsyn	Coding region
mtbs2341636_G	2341636	766	C	G	2180	Rv2083		CTG/GTG	256	L/V	Nonsyn	Coding region
mtbs2344246_C	2344246	1305	G	C	823			ACG/ACC	435	T/T	Syn	Mobile element
mtbs2344499_G	2344499	89	T	G	771	Rv2088	pknJ	CTG/CGG	30	L/R	Nonsyn	Coding region
mtbs2345037_A	2345037	627	C	A	1930	Rv2088	pknJ	CTC/CTA	209	L/L	Syn	Coding region
mtbs2346318_A	2346318	1007	G	A	759	Rv2089c	pepE	CCG/CTG	336	P/L	Nonsyn	Coding region
mtbs2348446_G	2348446	1074	C	G	1948	Rv2090		TTC/TTG	358	F/L	Nonsyn	Coding region
mtbs2354791_G	2354791	520	A	G	836	Rv2096c	pafB	TCG/CCG	174	S/P	Nonsyn	Coding region
mtbs2361604_G	2361604	1365	C	G	2021	Rv2101	helZ	GTC/GTG	455	V/V	Syn	Coding region
mtbs2362041_A	2362041	1802	C	A	1965	Rv2101	helZ	CCG/CAG	601	P/Q	Nonsyn	Coding region
mtbs2364475_C	2364475	46	T	C	759	Rv2103c	vapC37	ACA/GCA	16	T/A	Nonsyn	Coding region
mtbs2369186_C	2369186	544	G	C	991	Rv2109c	prcA	CGT/GGT	182	R/G	Nonsyn	Coding region
mtbs2369326_G	2369326	404	C	G	1311	Rv2109c	prcA	CGC/CCC	135	R/P	Nonsyn	Coding region
mtbs2386389_A	2386389	97	G	A	2031	Rv2125		GGC/AGC	33	G/S	Nonsyn	Coding region
mtbs2387733_C	2387733	240	T	C	2330	Rv2126c	PE_PGRS37	GAA/GAG	80	E/E	Syn	Coding region
mtbs2388641_A	2388641	26	G	A	1075	Rv2127	ansP1	GGC/GAC	9	G/D	Nonsyn	Coding region
mtbs2399734_A	2399734	1015	G	A	857	Rv2139	pyrD	GGC/AGC	339	G/S	Nonsyn	Coding region
mtbs2411496_A	2411496	627	G	A	750	Rv2152c	murC	TTC/TTT	209	F/F	Syn	Coding region
mtbs2413246_A	2413246	106	C	A	1166	Rv2153c	murG	GTG/TTG	36	V/L	Nonsyn	Coding region
mtbs2415656_C	2415656	739	G	C	2304	Rv2155c	murD	CGG/GGG	247	R/G	Nonsyn	Coding region
mtbs2421816_G	2421816	188	A	G	1173	Rv2160c		GTG/GCG	63	V/A	Nonsyn	Coding region
mtbs2424925_G	2424925	2424925	A	G	1869
mtbs2425471_C	2425471	1617	T	C	1033	Rv2163c	pbpB	CGA/CGG	539	R/R	Syn	Coding region
mtbs2440926_T	2440926	795	G	T	1766	Rv2178c	aroG	GAC/GAA	265	D/E	Nonsyn	Coding region
mtbs2442468_T	2442468	747	C	T	800	Rv2180c		TGG/TGA	249	W/Stop	Nonsyn	Coding region
mtbs2448458_T	2448458	299	C	T	982	Rv2187	fadD15	ACC/ATC	100	T/I	Nonsyn	Coding region
mtbs2451700_C	2451700	321	A	C	785	Rv2189c		GCT/GCG	107	A/A	Syn	Coding region
mtbs2462871_A	2462871	177	G	A	1896	Rv2198c	mmpS3	GCC/GCT	59	A/A	Syn	Coding region
mtbs2470591_C	2470591	2470591	A	C	998
mtbs2472610_T	2472610	118	C	T	530	Rv2208	cobS	CTG/TTG	40	L/L	Syn	Coding region
mtbs2491597_T	2491597	757	G	T	792	Rv2221c	glnE	CGG/AGG	253	R/R	Syn	Coding region
mtbs2499726_A	2499726	895	G	A	1901	Rv2226		GAT/AAT	299	D/N	Nonsyn	Coding region
mtbs2505085_A	2505085	615	G	A	778	Rv2231c	cobC	GCC/GCT	205	A/A	Syn	Coding region
mtbs2509140_C	2509140	236	G	C	2116	Rv2236c	cobD	TCC/TGC	79	S/C	Nonsyn	Coding region
mtbs2509722_G	2509722	234	A	G	2182	Rv2237		CCA/CCG	78	P/P	Syn	Coding region
mtbs2510350_G	2510350	2510350	C	G	749
mtbs2513645_A	2513645	1107	G	A	538	Rv2241	aceE	AAG/AAA	369	K/K	Syn	Coding region
mtbs2516567_C	2516567	2516567	G	C	1239
mtbs2518214_C	2518214	100	A	C	1	Rv2245	kasA	AAG/CAG	34	K/Q	Nonsyn	Coding region
mtbs2521342_C	2521342	600	T	C	2054	Rv2247	accD6	GAT/GAC	200	D/D	Syn	Coding region
mtbs2521428_G	2521428	686	A	G	770	Rv2247	accD6	GAC/GGC	229	D/G	Nonsyn	Coding region
mtbs2522955_G	2522955	596	T	G	781	Rv2248		GTC/GGC	199	V/G	Nonsyn	Coding region
mtbs2526974_C	2526974	1410	T	C	1299	Rv2251		CCT/CCC	470	P/P	Syn	Coding region
mtbs2527575_A	2527575	587	G	A	65	Rv2252		GGC/GAC	196	G/D	Nonsyn	Coding region
mtbs2529680_G	2529680	195	A	G	1859	Rv2256c		ACT/ACC	65	T/T	Syn	Coding region
mtbs2531742_G	2531742	156	A	G	1790	Rv2258c		GCT/GCC	52	A/A	Syn	Coding region
mtbs2533377_C	2533377	48	T	C	893	Rv2260		GAT/GAC	16	D/D	Syn	Coding region
mtbs2536599_T	2536599	1752	C	T	791	Rv2264c		GGG/GGA	584	G/G	Syn	Coding region
mtbs2536892_C	2536892	1459	T	C	861	Rv2264c		ACC/GCC	487	T/A	Nonsyn	Coding region
mtbs2543395_C	2543395	882	T	C	755	Rv2268c	cyp128	GAA/GAG	294	E/E	Syn	Coding region
mtbs2546684_A	2546684	122	C	A	813	Rv2274c	mazF8	GGT/GTT	41	G/V	Nonsyn	Coding region
mtbs2548700_T	2548700	952	C	T	785	Rv2276	cyp121	CAC/TAC	318	H/Y	Nonsyn	Coding region
mtbs2551576_G	2551576	17	C	G	887	Rv2280		GCT/GGT	6	A/G	Nonsyn	Coding region
mtbs2551577_C	2551577	18	T	C	885	Rv2280		GCT/GCC	6	A/A	Syn	Coding region
mtbs2562644_T	2562644	46	G	T	857	Rv2290	lppO	GCG/TCG	16	A/S	Nonsyn	Coding region
mtbs2566768_C	2566768	2566768	A	C	169
mtbs2573756_A	2573756	2573756	C	A	1702
mtbs2578626_G	2578626	71	A	G	1310	Rv2307c		ATG/ACG	24	M/T	Nonsyn	Coding region
mtbs2581052_A	2581052	634	G	A	768	Rv2308		GAC/AAC	212	D/N	Nonsyn	Coding region
mtbs2586076_G	2586076	1215	C	G	834	Rv2314c		CGG/CGC	405	R/R	Syn	Coding region
mtbs2586127_G	2586127	1164	A	G	2086	Rv2314c		GGT/GGC	388	G/G	Syn	Coding region
mtbs2586442_C	2586442	849	A	C	1	Rv2314c		GGT/GGG	283	G/G	Syn	Coding region
mtbs2589036_C	2589036	199	G	C	812	Rv2316	uspA	GAC/CAC	67	D/H	Nonsyn	Coding region
mtbs2589216_C	2589216	379	G	C	1314	Rv2316	uspA	GTG/CTG	127	V/L	Nonsyn	Coding region
mtbs2592310_A	2592310	417	G	A	721	Rv2319c		ATC/ATT	139	I/I	Syn	Coding region
mtbs2598400_G	2598400	1548	A	G	1969	Rv2326c		AAT/AAC	516	N/N	Syn	Coding region
mtbs2600260_G	2600260	273	A	G	953	Rv2327		CGA/CGG	91	R/R	Syn	Coding region
mtbs2601576_G	2601576	846	T	G	852	Rv2328	PE23	AGT/AGG	282	S/R	Nonsyn	Coding region
mtbs2601760_A	2601760	1030	G	A	748	Rv2328	PE23	GCC/ACC	344	A/T	Nonsyn	Coding region
mtbs2608117_A	2608117	205	C	A	1441	Rv2333c	stp	GAC/TAC	69	D/Y	Nonsyn	Coding region
mtbs2612256_T	2612256	732	G	T	903	Rv2337c		CTC/CTA	244	L/L	Syn	Coding region
mtbs2612632_A	2612632	356	C	A	2036	Rv2337c		GGC/GTC	119	G/V	Nonsyn	Coding region
mtbs2619271_C	2619271	2619271	T	C	944
mtbs2625924_C	2625924	249	T	C	1111	Rv2346c	esxO	GCA/GCG	83	A/A	Syn	Coding region
mtbs2626004_A	2626004	169	G	A	982	Rv2346c	esxO	CTG/TTG	57	L/L	Syn	Coding region
mtbs2626011_A	2626011	162	G	A	978	Rv2346c	esxO	ATC/ATT	54	I/I	Syn	Coding region
mtbs2626018_C	2626018	155	T	C	914	Rv2346c	esxO	GAG/GGG	52	E/G	Nonsyn	Coding region
mtbs2626513_A	2626513	7	T	A	1081	Rv2347c	esxP	ACA/TCA	3	T/S	Nonsyn	Coding region
mtbs2626514_G	2626514	6	T	G	1082	Rv2347c	esxP	GCA/GCC	2	A/A	Syn	Coding region
mtbs2627618_A	2627618	1081	C	A	761	Rv2349c	plcC	GGC/TGC	361	G/C	Nonsyn	Coding region
mtbs2627946_G	2627946	753	A	G	827	Rv2349c	plcC	CGT/CGC	251	R/R	Syn	Coding region
mtbs2630740_C	2630740	1336	T	C	798	Rv2351c	plcA	ACT/GCT	446	T/A	Nonsyn	Coding region
mtbs2631371_T	2631371	705	C	T	762	Rv2351c	plcA	GTG/GTA	235	V/V	Syn	Coding region
mtbs2634282_G	2634282	2634282	T	G	722
mtbs2637162_T	2637162	2637162	C	T	756
mtbs2637541_T	2637541	2637541	C	T	1181
mtbs2642383_T	2642383	196	C	T	1243	Rv2360c		GCC/ACC	66	A/T	Nonsyn	Coding region
mtbs2647905_A	2647905	463	G	A	763	Rv2366c		CGC/TGC	155	R/C	Nonsyn	Coding region
mtbs2656225_G	2656225	206	A	G	1930	Rv2377c	mbtH	GTC/GCC	69	V/A	Nonsyn	Coding region
mtbs2657447_T	2657447	257	C	T	1	Rv2378c	mbtG	CGG/CAG	86	R/Q	Nonsyn	Coding region
mtbs2660319_G	2660319	1767	C	G	1757	Rv2379c	mbtF	GAG/GAC	589	E/D	Nonsyn	Coding region
mtbs2663795_A	2663795	3321	G	A	843	Rv2380c	mbtE	GCC/GCT	1107	A/A	Syn	Coding region
mtbs2668467_A	2668467	1803	G	A	535	Rv2381c	mbtD	CCC/CCT	601	P/P	Syn	Coding region
mtbs2669349_T	2669349	921	C	T	72	Rv2381c	mbtD	GAG/GAA	307	E/E	Syn	Coding region
mtbs2673818_G	2673818	2020	C	G	844	Rv2383c	mbtB	GTG/CTG	674	V/L	Nonsyn	Coding region
mtbs2680658_G	2680658	2680658	T	G	1775
mtbs2692100_T	2692100	2692100	C	T	730
mtbs2695378_G	2695378	422	C	G	1753	Rv2398c	cysW	GGC/GCC	141	G/A	Nonsyn	Coding region
mtbs2697489_T	2697489	226	C	T	873	Rv2400c	subI	GCG/ACG	76	A/T	Nonsyn	Coding region
mtbs2706663_T	2706663	647	G	T	800	Rv2408	PE24	GGT/GTT	216	G/V	Nonsyn	Coding region
mtbs2711722_G	2711722	1155	T	G	899	Rv2414c		CCA/CCC	385	P/P	Syn	Coding region
mtbs2713795_T	2713795	2713795	C	T	1888
mtbs2718852_G	2718852	2718852	T	G	1921
mtbs2720952_C	2720952	826	T	C	1077	Rv2424c		ACC/GCC	276	T/A	Nonsyn	Coding region
mtbs2720954_A	2720954	824	G	A	1077	Rv2424c		ACC/ATC	275	T/I	Nonsyn	Coding region
mtbs2721562_G	2721562	216	C	G	1231	Rv2424c		GCG/GCC	72	A/A	Syn	Coding region
mtbs2723506_C	2723506	678	T	C	956	Rv2426c		TTA/TTG	226	L/L	Syn	Coding region
mtbs2729058_C	2729058	77	A	C	915	Rv2433c		CTG/CGG	26	L/R	Nonsyn	Coding region
mtbs2734074_C	2734074	845	T	C	2346	Rv2436	rbsK	GTC/GCC	282	V/A	Nonsyn	Coding region
mtbs2737572_A	2737572	676	C	A	1522	Rv2439c	proB	GCG/TCG	226	A/S	Nonsyn	Coding region
mtbs2738274_C	2738274	1413	A	C	873	Rv2440c	obg	AGT/AGG	471	S/R	Nonsyn	Coding region
mtbs2740693_C	2740693	2740693	T	C	1075
mtbs2741209_A	2741209	501	G	A	792	Rv2443	dctA	CTG/CTA	167	L/L	Syn	Coding region
mtbs2751804_T	2751804	377	C	T	2254	Rv2450c	rpfE	CGG/CAG	126	R/Q	Nonsyn	Coding region
mtbs2752122_C	2752122	59	G	C	886	Rv2450c	rpfE	ACG/AGG	20	T/R	Nonsyn	Coding region
mtbs2752698_A	2752698	2752698	C	A	1796
mtbs2760152_G	2760152	374	A	G	2061	Rv2458	mmuM	TAC/TGC	125	Y/C	Nonsyn	Coding region
mtbs2774555_C	2774555	992	T	C	775	Rv2471	aglA	GTG/GCG	331	V/A	Nonsyn	Coding region
mtbs2775361_T	2775361	90	C	T	810	Rv2472		CGC/CGT	30	R/R	Syn	Coding region
mtbs2779136_C	2779136	3127	T	C	1999	Rv2476c	gdh	AGC/GGC	1043	S/G	Nonsyn	Coding region
mtbs2786952_G	2786952	2332	A	G	1962	Rv2482c	plsB2	TGC/CGC	778	C/R	Nonsyn	Coding region
mtbs2789798_T	2789798	1225	G	T	751	Rv2483c	plsC	CGG/AGG	409	R/R	Syn	Coding region
mtbs2791098_T	2791098	1397	C	T	1089	Rv2484c		GGT/GAT	466	G/D	Nonsyn	Coding region
mtbs2793810_A	2793810	179	C	A	789	Rv2485c	lipQ	CGC/CTC	60	R/L	Nonsyn	Coding region
mtbs2794071_A	2794071	2794071	G	A	738
mtbs2800087_A	2800087	794	G	A	778	Rv2488c		ACC/ATC	265	T/I	Nonsyn	Coding region
mtbs2802041_T	2802041	4196	C	T	832	Rv2490c	PE_PGRS43	GGC/GAC	1399	G/D	Nonsyn	Coding region
mtbs2807486_A	2807486	209	C	A	924	Rv2492		GCC/GAC	70	A/D	Nonsyn	Coding region
mtbs2808452_C	2808452	143	T	C	767	Rv2494	vapC38	GTG/GCG	48	V/A	Nonsyn	Coding region
mtbs2809621_C	2809621	319	T	C	2199	Rv2495c	bkdC	ACC/GCC	107	T/A	Nonsyn	Coding region
mtbs2809633_C	2809633	307	A	C	830	Rv2495c	bkdC	TAC/GAC	103	Y/D	Nonsyn	Coding region
mtbs2817269_T	2817269	1206	C	T	65	Rv2502c	accD1	AAG/AAA	402	K/K	Syn	Coding region
mtbs2817502_C	2817502	973	A	C	747	Rv2502c	accD1	TTT/GTT	325	F/V	Nonsyn	Coding region
mtbs2818837_G	2818837	291	A	G	1985	Rv2503c	scoB	GGT/GGC	97	G/G	Syn	Coding region
mtbs2821342_T	2821342	255	C	T	1994	Rv2505c	fadD35	GCG/GCA	85	A/A	Syn	Coding region
mtbs2825466_A	2825466	789	G	A	984	Rv2509		AAG/AAA	263	K/K	Syn	Coding region
mtbs2825581_G	2825581	1509	T	G	787	Rv2510c		ATA/ATC	503	I/I	Syn	Coding region
mtbs2827984_T	2827984	2827984	G	T	1919
mtbs2828019_C	2828019	2828019	T	C	1953
mtbs2829294_T	2829294	510	C	T	1	Rv2512c		GTG/GTA	170	V/V	Syn	Coding region
mtbs2829779_C	2829779	25	T	C	1506	Rv2512c		ACC/GCC	9	T/A	Nonsyn	Coding region
mtbs2830525_A	2830525	365	C	A	1870	Rv2513		ACG/AAG	122	T/K	Nonsyn	Coding region
mtbs2833329_A	2833329	185	G	A	779	Rv2516c		GCT/GTT	62	A/V	Nonsyn	Coding region
mtbs2835984_C	2835984	200	T	C	774	Rv2519	PE26	GTG/GCG	67	V/A	Nonsyn	Coding region
mtbs2838897_G	2838897	645	C	G	691	Rv2522c		ATG/ATC	215	M/I	Nonsyn	Coding region
mtbs2841022_G	2841022	8311	A	G	1157	Rv2524c	fas	TGC/CGC	2771	C/R	Nonsyn	Coding region
mtbs2844573_T	2844573	4760	C	T	537	Rv2524c	fas	CGC/CAC	1587	R/H	Nonsyn	Coding region
mtbs2847281_G	2847281	2052	A	G	1010	Rv2524c	fas	GAT/GAC	684	D/D	Syn	Coding region
mtbs2850631_C	2850631	2850631	T	C	719
mtbs2851270_T	2851270	180	C	T	1	Rv2526	vapB17	GGC/GGT	60	G/G	Syn	Coding region
mtbs2855259_G	2855259	2523	A	G	2178	Rv2531c		GCT/GCC	841	A/A	Syn	Coding region
mtbs2865760_G	2865760	631	A	G	1909	Rv2542		ACC/GCC	211	T/A	Nonsyn	Coding region
mtbs2865882_C	2865882	753	T	C	1782	Rv2542		GTT/GTC	251	V/V	Syn	Coding region
mtbs2866607_A	2866607	140	G	A	848	Rv2543	lppA	GGC/GAC	47	G/D	Nonsyn	Coding region
mtbs2866647_A	2866647	180	G	A	796	Rv2543	lppA	AAG/AAA	60	K/K	Syn	Coding region
mtbs2866671_A	2866671	204	G	A	766	Rv2543	lppA	GAG/GAA	68	E/E	Syn	Coding region
mtbs2866677_C	2866677	210	A	C	767	Rv2543	lppA	CTA/CTC	70	L/L	Syn	Coding region
mtbs2866744_A	2866744	277	G	A	714	Rv2543	lppA	GAC/AAC	93	D/N	Nonsyn	Coding region
mtbs2866745_C	2866745	278	A	C	717	Rv2543	lppA	GAC/GCC	93	D/A	Nonsyn	Coding region
mtbs2866749_A	2866749	282	C	A	722	Rv2543	lppA	GAC/GAA	94	D/E	Nonsyn	Coding region
mtbs2866773_C	2866772	304	A	C	1	Rv2543	lppA	GAC/GCC	102	D/A	Nonsyn	Coding region
mtbs2866805_G	2866805	338	C	G	29	Rv2543	lppA	GCG/GGG	113	A/G	Nonsyn	Coding region
mtbs2866806_C	2866806	339	G	C	30	Rv2543	lppA	GCG/GCC	113	A/A	Syn	Coding region
mtbs2866815_C	2866815	348	G	C	55	Rv2543	lppA	GCG/GCC	116	A/A	Syn	Coding region
mtbs2866831_G	2866831	364	A	G	43	Rv2543	lppA	AAC/GAC	122	N/D	Nonsyn	Coding region
mtbs2866839_T	2866839	372	A	T	74	Rv2543	lppA	GTA/GTT	124	V/V	Syn	Coding region
mtbs2866842_C	2866842	375	G	C	220	Rv2543	lppA	ATG/ATC	125	M/I	Nonsyn	Coding region
mtbs2866845_T	2866845	378	C	T	292	Rv2543	lppA	TTC/TTT	126	F/F	Syn	Coding region
mtbs2866848_T	2866848	381	C	T	490	Rv2543	lppA	GGC/GGT	127	G/G	Syn	Coding region
mtbs2866849_A	2866849	382	G	A	500	Rv2543	lppA	GCC/ACC	128	A/T	Nonsyn	Coding region
mtbs2866851_T	2866851	384	C	T	500	Rv2543	lppA	GCC/GCT	128	A/A	Syn	Coding region
mtbs2866852_G	2866852	385	A	G	504	Rv2543	lppA	ACG/GCG	129	T/A	Nonsyn	Coding region
mtbs2866863_G	2866863	396	C	G	857	Rv2543	lppA	GCC/GCG	132	A/A	Syn	Coding region
mtbs2866876_G	2866876	409	A	G	927	Rv2543	lppA	ATT/GTT	137	I/V	Nonsyn	Coding region
mtbs2866880_T	2866880	413	C	T	924	Rv2543	lppA	GCC/GTC	138	A/V	Nonsyn	Coding region
mtbs2866882_A	2866882	415	G	A	927	Rv2543	lppA	GCC/ACC	139	A/T	Nonsyn	Coding region
mtbs2867207_G	2867207	84	C	G	1239	Rv2544	lppB	GCC/GCG	28	A/A	Syn	Coding region
mtbs2867230_A	2867230	107	G	A	1085	Rv2544	lppB	GGC/GAC	36	G/D	Nonsyn	Coding region
mtbs2867231_T	2867231	108	C	T	1072	Rv2544	lppB	GGC/GGT	36	G/G	Syn	Coding region
mtbs2867236_G	2867236	113	A	G	1059	Rv2544	lppB	AAC/AGC	38	N/S	Nonsyn	Coding region
mtbs2867240_T	2867240	117	C	T	1047	Rv2544	lppB	CCC/CCT	39	P/P	Syn	Coding region
mtbs2867245_C	2867245	122	A	C	1100	Rv2544	lppB	AAA/ACA	41	K/T	Nonsyn	Coding region
mtbs2867251_G	2867251	128	C	G	1049	Rv2544	lppB	CCG/CGG	43	P/R	Nonsyn	Coding region
mtbs2867254_G	2867254	131	A	G	1055	Rv2544	lppB	CAC/CGC	44	H/R	Nonsyn	Coding region
mtbs2867263_A	2867263	140	G	A	1113	Rv2544	lppB	GGC/GAC	47	G/D	Nonsyn	Coding region
mtbs2867298_A	2867298	175	C	A	1097	Rv2544	lppB	CAC/AAC	59	H/N	Nonsyn	Coding region
mtbs2867347_G	2867347	224	A	G	984	Rv2544	lppB	CAG/CGG	75	Q/R	Nonsyn	Coding region
mtbs2867401_C	2867401	278	A	C	677	Rv2544	lppB	AAC/ACC	93	N/T	Nonsyn	Coding region
mtbs2867405_A	2867405	282	C	A	472	Rv2544	lppB	GAC/GAA	94	D/E	Nonsyn	Coding region
mtbs2867436_G	2867435	311	T	G	1	Rv2544	lppB	AAT/AAG	104	N/K	Nonsyn	Coding region
mtbs2867458_C	2867458	335	G	C	70	Rv2544	lppB	AGT/ACT	112	S/T	Nonsyn	Coding region
mtbs2867459_C	2867459	336	T	C	66	Rv2544	lppB	AGT/AGC	112	S/S	Syn	Coding region
mtbs2867461_G	2867461	338	C	G	72	Rv2544	lppB	GCC/GGC	113	A/G	Nonsyn	Coding region
mtbs2867483_C	2867483	360	G	C	32	Rv2544	lppB	ATG/ATC	120	M/I	Nonsyn	Coding region
mtbs2867487_G	2867487	364	A	G	14	Rv2544	lppB	AAA/GAA	122	K/E	Nonsyn	Coding region
mtbs2867496_A	2867496	373	G	A	13	Rv2544	lppB	GAC/AAC	125	D/N	Nonsyn	Coding region
mtbs2867497_T	2867497	374	A	T	10	Rv2544	lppB	GAC/GTC	125	D/V	Nonsyn	Coding region
mtbs2867501_T	2867501	378	C	T	18	Rv2544	lppB	TTC/TTT	126	F/F	Syn	Coding region
mtbs2867510_G	2867510	387	A	G	36	Rv2544	lppB	ACA/ACG	129	T/T	Syn	Coding region
mtbs2867522_G	2867522	399	A	G	603	Rv2544	lppB	GAA/GAG	133	E/E	Syn	Coding region
mtbs2867532_G	2867532	409	A	G	806	Rv2544	lppB	ATT/GTT	137	I/V	Nonsyn	Coding region
mtbs2867536_T	2867536	413	C	T	814	Rv2544	lppB	GCC/GTC	138	A/V	Nonsyn	Coding region
mtbs2867538_A	2867538	415	G	A	821	Rv2544	lppB	GCC/ACC	139	A/T	Nonsyn	Coding region
mtbs2867552_G	2867552	429	A	G	876	Rv2544	lppB	CGA/CGG	143	R/R	Syn	Coding region
mtbs2867575_C	2867575	452	T	C	920	Rv2544	lppB	GTG/GCG	151	V/A	Nonsyn	Coding region
mtbs2867594_A	2867594	471	G	A	890	Rv2544	lppB	CTG/CTA	157	L/L	Syn	Coding region
mtbs2867756_C	2867756	633	T	C	956	Rv2544	lppB	ATT/ATC	211	I/I	Syn	Coding region
mtbs2878550_A	2878550	2878550	G	A	678
mtbs2880702_C	2880702	628	G	C	1689	Rv2560		GTC/CTC	210	V/L	Nonsyn	Coding region
mtbs2881974_A	2881974	217	G	A	755	Rv2562		GCC/ACC	73	A/T	Nonsyn	Coding region
mtbs2884068_C	2884068	727	A	C	854	Rv2564	glnQ	ATG/CTG	243	M/L	Nonsyn	Coding region
mtbs2886570_G	2886570	198	A	G	1047	Rv2566		GAA/GAG	66	E/E	Syn	Coding region
mtbs2888201_C	2888201	1829	T	C	2067	Rv2566		CTC/CCC	610	L/P	Nonsyn	Coding region
mtbs2889633_C	2889633	3261	T	C	2324	Rv2566		GCT/GCC	1087	A/A	Syn	Coding region
mtbs2891267_T	2891267	1473	C	T	2019	Rv2567		GGC/GGT	491	G/G	Syn	Coding region
mtbs2891728_G	2891728	1934	A	G	2097	Rv2567		CAG/CGG	645	Q/R	Nonsyn	Coding region
mtbs2894208_A	2894208	201	G	A	2074	Rv2569c		AGC/AGT	67	S/S	Syn	Coding region
mtbs2898522_C	2898522	480	T	C	919	Rv2573		TAT/TAC	160	Y/Y	Syn	Coding region
mtbs2903439_A	2903439	93	G	A	851	Rv2578c		AGC/AGT	31	S/S	Syn	Coding region
mtbs2910461_T	2910461	440	G	T	2270	Rv2584c	apt	GCG/GAG	147	A/E	Nonsyn	Coding region
mtbs2911293_G	2911293	1385	C	G	2078	Rv2585c		TGT/TCT	462	C/S	Nonsyn	Coding region
mtbs2912294_G	2912294	384	T	G	1976	Rv2585c		GCA/GCC	128	A/A	Syn	Coding region
mtbs2915934_G	2915934	260	T	G	66	Rv2588c	yajC	GAC/GCC	87	D/A	Nonsyn	Coding region
mtbs2917542_A	2917542	1183	G	A	1	Rv2589	gabT	GCC/ACC	395	A/T	Nonsyn	Coding region
mtbs2922591_A	2922591	1041	C	A	722	Rv2591	PE_PGRS44	GCC/GCA	347	A/A	Syn	Coding region
mtbs2922846_T	2922846	1296	C	T	891	Rv2591	PE_PGRS44	GGC/GGT	432	G/G	Syn	Coding region
mtbs2922848_T	2922848	1298	A	T	896	Rv2591	PE_PGRS44	CAG/CTG	433	Q/L	Nonsyn	Coding region
mtbs2923391_C	2923391	843	T	C	2301	Rv2592c	ruvB	CCA/CCG	281	P/P	Syn	Coding region
mtbs2925962_C	2925962	229	T	C	971	Rv2596	vapC40	TGC/CGC	77	C/R	Nonsyn	Coding region
mtbs2927939_C	2927939	2927939	T	C	1893
mtbs2939372_G	2939372	591	A	G	63	Rv2611c		TCT/TCC	197	S/S	Syn	Coding region
mtbs2939373_C	2939373	590	G	C	2043	Rv2611c		TCT/TGT	197	S/C	Nonsyn	Coding region
mtbs2939657_C	2939657	306	T	C	2134	Rv2611c		ATA/ATG	102	I/M	Nonsyn	Coding region
mtbs2944515_C	2944515	471	A	C	697	Rv2615c	PE_PGRS45	GGT/GGG	157	G/G	Syn	Coding region
mtbs2944524_G	2944524	462	C	G	688	Rv2615c	PE_PGRS45	GGG/GGC	154	G/G	Syn	Coding region
mtbs2944769_C	2944769	217	G	C	49	Rv2615c	PE_PGRS45	CAA/GAA	73	Q/E	Nonsyn	Coding region
mtbs2944773_G	2944773	213	A	G	48	Rv2615c	PE_PGRS45	TAT/TAC	71	Y/Y	Syn	Coding region
mtbs2948230_A	2948230	329	G	A	858	Rv2621c		GCC/GTC	110	A/V	Nonsyn	Coding region
mtbs2954439_C	2954439	310	T	C	1865	Rv2627c		AGA/GGA	104	R/G	Nonsyn	Coding region
mtbs2955957_C	2955957	191	A	C	813	Rv2629		GAT/GCT	64	D/A	Nonsyn	Coding region
mtbs2961808_T	2961808	634	C	T	556	Rv2634c	PE_PGRS46	GGT/AGT	212	G/S	Nonsyn	Coding region
mtbs2968452_A	2968452	2968452	G	A	64
mtbs2969197_G	2969197	2969197	A	G	731
mtbs2974933_G	2974933	302	A	G	1957	Rv2650c		ATC/ACC	101	I/T	Nonsyn	Coding region
mtbs2975227_G	2975227	8	T	G	872	Rv2650c		AAT/ACT	3	N/T	Nonsyn	Coding region
mtbs2980861_G	2980861	2980861	A	G	729
mtbs2983095_G	2983095	25	A	G	1104	Rv2666		ACC/GCC	9	T/A	Nonsyn	Coding region
mtbs2983613_A	2983613	543	G	A	1039	Rv2666		GGG/GGA	181	G/G	Syn	Coding region
mtbs2983873_G	2983873	803	A	G	781	Rv2666		TAA/TGA	268	Stop/Stop	Syn	Coding region
mtbs2984740_G	2984740	8	A	G	2151	Rv2668		CAC/CGC	3	H/R	Nonsyn	Coding region
mtbs2988630_G	2988630	949	C	G	1060	Rv2672		CAT/GAT	317	H/D	Nonsyn	Coding region
mtbs2994187_C	2994187	876	T	C	1146	Rv2678c	hemE	TTA/TTG	292	L/L	Syn	Coding region
mtbs3003115_G	3003115	1133	C	G	996	Rv2685	arsB1	GCA/GGA	378	A/G	Nonsyn	Coding region
mtbs3005185_T	3005185	466	G	T	1830	Rv2688c		CCC/ACC	156	P/T	Nonsyn	Coding region
mtbs3009692_G	3009692	349	A	G	1845	Rv2691	ceoB	ACC/GCC	117	T/A	Nonsyn	Coding region
mtbs3009834_G	3009834	491	A	G	761	Rv2691	ceoB	GAT/GGT	164	D/G	Nonsyn	Coding region
mtbs3010420_G	3010420	397	A	G	1046	Rv2692	ceoC	ATC/GTC	133	I/V	Nonsyn	Coding region
mtbs3010993_T	3010993	376	C	T	834	Rv2693c		GGG/AGG	126	G/R	Nonsyn	Coding region
mtbs3017465_C	3017465	608	T	C	1860	Rv2702	ppgK	ATA/ACA	203	I/T	Nonsyn	Coding region
mtbs3024021_A	3024021	457	C	A	814	Rv2711	ideR	CGG/AGG	153	R/R	Syn	Coding region
mtbs3024343_A	3024343	986	G	A	781	Rv2712c		ACC/ATC	329	T/I	Nonsyn	Coding region
mtbs3027798_C	3027798	734	T	C	1189	Rv2714		GTG/GCG	245	V/A	Nonsyn	Coding region
mtbs3031168_G	3031168	370	A	G	1159	Rv2719c		TAT/CAT	124	Y/H	Nonsyn	Coding region
mtbs3033189_A	3033189	1431	G	A	769	Rv2721c		CCC/CCT	477	P/P	Syn	Coding region
mtbs3036826_T	3036826	466	C	T	743	Rv2724c	fadE20	GTG/ATG	156	V/M	Nonsyn	Coding region
mtbs3037377_C	3037377	3037377	T	C	1432
mtbs3041871_T	3041871	605	G	T	1800	Rv2729c		GCG/GAG	202	A/E	Nonsyn	Coding region
mtbs3048912_G	3048912	175	C	G	859	Rv2736c	recX	GTT/CTT	59	V/L	Nonsyn	Coding region
mtbs3054081_G	3054081	168	A	G	1828	Rv2741	PE_PGRS47	GGA/GGG	56	G/G	Syn	Coding region
mtbs3054321_G	3054321	408	A	G	2269	Rv2741	PE_PGRS47	GGA/GGG	136	G/G	Syn	Coding region
mtbs3054724_G	3054724	811	A	G	1625	Rv2741	PE_PGRS47	AGC/GGC	271	S/G	Nonsyn	Coding region
mtbs3056767_T	3056767	466	G	T	712	Rv2743c		CCG/ACG	156	P/T	Nonsyn	Coding region
mtbs3069167_G	3069167	917	A	G	1273	Rv2756c	hsdM	CTG/CCG	306	L/P	Nonsyn	Coding region
mtbs3073715_C	3073715	757	G	C	19	Rv2764c	thyA	CCG/GCG	253	P/A	Nonsyn	Coding region
mtbs3078178_T	3078178	808	C	T	1343	Rv2769c	PE27	GTG/ATG	270	V/M	Nonsyn	Coding region
mtbs3079877_G	3079877	581	A	G	1033	Rv2770c	PPE44	TTC/TCC	194	F/S	Nonsyn	Coding region
mtbs3080795_G	3080795	239	A	G	1915	Rv2771c		CTC/CCC	80	L/P	Nonsyn	Coding region
mtbs3086788_C	3086788	3086788	T	C	1647
mtbs3103682_C	3103682	259	T	C	2096	Rv2794c	pptT	ATG/GTG	87	M/V	Nonsyn	Coding region
mtbs3104189_G	3104189	723	A	G	948	Rv2795c		TGT/TGC	241	C/C	Syn	Coding region
mtbs3110140_T	3110140	3110140	G	T	729
mtbs3111476_T	3111476	348	C	T	865	Rv2802c		TCG/TCA	116	S/S	Syn	Coding region
mtbs3112877_A	3112877	11	G	A	1045	Rv2805		GGC/GAC	4	G/D	Nonsyn	Coding region
mtbs3113872_T	3113872	215	A	T	2123	Rv2807		GAG/GTG	72	E/V	Nonsyn	Coding region
mtbs3115384_C	3115384	3115384	G	C	821
mtbs3118000_G	3118000	1183	A	G	2105	Rv2812		AGG/GGG	395	R/G	Nonsyn	Coding region
mtbs3133054_G	3133054	486	C	G	1152	Rv2825c		TCG/TCC	162	S/S	Syn	Coding region
mtbs3133055_C	3133055	485	G	C	1150	Rv2825c		TCG/TGG	162	S/W	Nonsyn	Coding region
mtbs3133536_C	3133536	4	T	C	1709	Rv2825c		AAA/GAA	2	K/E	Nonsyn	Coding region
mtbs3135606_G	3135606	3135606	A	G	734
mtbs3135912_C	3135912	422	G	C	1068	Rv2828c		ACG/AGG	141	T/R	Nonsyn	Coding region
mtbs3135950_G	3135950	384	C	G	1033	Rv2828c		TCG/TCC	128	S/S	Syn	Coding region
mtbs3135951_C	3135951	383	G	C	1035	Rv2828c		TCG/TGG	128	S/W	Nonsyn	Coding region
mtbs3137058_A	3137058	167	G	A	1982	Rv2830c	vapB22	GCG/GTG	56	A/V	Nonsyn	Coding region
mtbs3137736_T	3137736	466	G	T	859	Rv2831	echA16	GAC/TAC	156	D/Y	Nonsyn	Coding region
mtbs3144623_T	3144623	23	C	T	814	Rv2837c		AGT/AAT	8	S/N	Nonsyn	Coding region
mtbs3162805_G	3162805	538	C	G	2105	Rv2853	PE_PGRS48	CGC/GGC	180	R/G	Nonsyn	Coding region
mtbs3165636_A	3165636	432	G	A	748	Rv2855	mtr	TCG/TCA	144	S/S	Syn	Coding region
mtbs3174496_G	3174496	148	A	G	990	Rv2862c		TGT/CGT	50	C/R	Nonsyn	Coding region
mtbs3177452_A	3177452	3177452	C	A	718
mtbs3177884_A	3177884	63	C	A	2078	Rv2866	relG	CGC/CGA	21	R/R	Syn	Coding region
mtbs3180988_A	3180988	775	C	A	1048	Rv2869c	rip	GTC/TTC	259	V/F	Nonsyn	Coding region
mtbs3186860_G	3186860	2014	T	G	2208	Rv2874	dipZ	TAT/GAT	672	Y/D	Nonsyn	Coding region
mtbs3189242_G	3189242	156	A	G	1089	Rv2878c	mpt53	GCT/GCC	52	A/A	Syn	Coding region
mtbs3200282_T	3200282	17	C	T	792	Rv2891		GCG/GTG	6	A/V	Nonsyn	Coding region
mtbs3209156_A	3209156	251	G	A	852	Rv2899c	fdhD	GCC/GTC	84	A/V	Nonsyn	Coding region
mtbs3214869_G	3214869	242	A	G	805	Rv2905	lppW	CAG/CGG	81	Q/R	Nonsyn	Coding region
mtbs3226181_C	3226181	105	A	C	1956	Rv2916c	ffh	CGT/CGG	35	R/R	Syn	Coding region
mtbs3228143_T	3228143	1781	G	T	2239	Rv2917		CGG/CTG	594	R/L	Nonsyn	Coding region
mtbs3232759_A	3232759	3232759	G	A	768
mtbs3247316_G	3247316	1872	C	G	1993	Rv2931	ppsA	GAC/GAG	624	D/E	Nonsyn	Coding region
mtbs3247851_A	3247851	2407	G	A	2030	Rv2931	ppsA	GCC/ACC	803	A/T	Nonsyn	Coding region
mtbs3247853_T	3247853	2409	C	T	2030	Rv2931	ppsA	GCC/GCT	803	A/A	Syn	Coding region
mtbs3247856_C	3247856	2412	G	C	2121	Rv2931	ppsA	CGG/CGC	804	R/R	Syn	Coding region
mtbs3247874_A	3247874	2430	G	A	1923	Rv2931	ppsA	CGG/CGA	810	R/R	Syn	Coding region
mtbs3247877_C	3247877	2433	T	C	1980	Rv2931	ppsA	TTT/TTC	811	F/F	Syn	Coding region
mtbs3247883_C	3247883	2439	T	C	2129	Rv2931	ppsA	AGT/AGC	813	S/S	Syn	Coding region
mtbs3248074_A	3248074	2630	G	A	2036	Rv2931	ppsA	CGC/CAC	877	R/H	Nonsyn	Coding region
mtbs3248075_T	3248075	2631	C	T	2035	Rv2931	ppsA	CGC/CGT	877	R/R	Syn	Coding region
mtbs3249025_G	3249025	3581	T	G	757	Rv2931	ppsA	CTA/CGA	1194	L/R	Nonsyn	Coding region
mtbs3256494_G	3256494	810	A	G	1875	Rv2933	ppsC	GGA/GGG	270	G/G	Syn	Coding region
mtbs3266030_G	3266030	3783	A	G	1174	Rv2934	ppsD	TCA/TCG	1261	S/S	Syn	Coding region
mtbs3269581_G	3269581	1845	A	G	1913	Rv2935	ppsE	GCA/GCG	615	A/A	Syn	Coding region
mtbs3270784_G	3270784	3048	A	G	1996	Rv2935	ppsE	CAA/CAG	1016	Q/Q	Syn	Coding region
mtbs3276703_G	3276703	6013	T	G	787	Rv2940c	mas	ACT/CCT	2005	T/P	Nonsyn	Coding region
mtbs3284640_G	3284640	1306	A	G	736	Rv2941	fadD28	ACA/GCA	436	T/A	Nonsyn	Coding region
mtbs3284855_T	3284855	1521	C	T	756	Rv2941	fadD28	ATC/ATT	507	I/I	Syn	Coding region
mtbs3296843_G	3296843	998	A	G	2195	Rv2947c	pks15	GTG/GCG	333	V/A	Nonsyn	Coding region
mtbs3304966_A	3304966	526	G	A	756	Rv2952		GGG/AGG	176	G/R	Nonsyn	Coding region
mtbs3308606_A	3308606	3308606	G	A	1807
mtbs3310174_A	3310174	705	G	A	703	Rv2957		AAG/AAA	235	K/K	Syn	Coding region
mtbs3310427_C	3310427	3310427	T	C	717
mtbs3310626_C	3310626	3310626	T	C	746
mtbs3314412_G	3314412	711	A	G	1025	Rv2962c		GCT/GCC	237	A/A	Syn	Coding region
mtbs3316955_C	3316955	427	A	C	841	Rv2964	purU	ATG/CTG	143	M/L	Nonsyn	Coding region
mtbs3326554_C	3326554	454	A	C	953	Rv2971		AAC/CAC	152	N/H	Nonsyn	Coding region
mtbs3332110_A	3332110	645	G	A	65	Rv2976c	ung	GTC/GTT	215	V/V	Syn	Coding region
mtbs3335708_C	3335708	41	G	C	936	Rv2979c		CCG/CGG	14	P/R	Nonsyn	Coding region
mtbs3336825_C	3336825	1093	T	C	2152	Rv2981c	ddlA	ACA/GCA	365	T/A	Nonsyn	Coding region
mtbs3338603_C	3338603	397	G	C	2095	Rv2982c	gpdA2	CCG/GCG	133	P/A	Nonsyn	Coding region
mtbs3352932_G	3352932	537	C	G	1286	Rv2995c	leuB	ACG/ACC	179	T/T	Syn	Coding region
mtbs3354407_A	3354407	663	G	A	1	Rv2996c	serA1	ACC/ACT	221	T/T	Syn	Coding region
mtbs3356135_C	3356135	1037	A	C	531	Rv2997		GAA/GCA	346	E/A	Nonsyn	Coding region
mtbs3358235_T	3358235	634	A	T	1883	Rv2999	lppY	ATG/TTG	212	M/L	Nonsyn	Coding region
mtbs3363338_G	3363338	3363338	A	G	1875
mtbs3367765_A	3367765	1029	G	A	1921	Rv3009c	gatB	GGC/GGT	343	G/G	Syn	Coding region
mtbs3375165_C	3375165	500	A	C	903	Rv3015c		TTC/TGC	167	F/C	Nonsyn	Coding region
mtbs3379432_C	3379432	1021	T	C	647	Rv3021c	PPE47	AGC/GGC	341	S/G	Nonsyn	Miscellaneous feature
mtbs3379708_C	3379708	745	G	C	1424	Rv3021c	PPE47	CTG/GTG	249	L/V	Nonsyn	Miscellaneous feature
mtbs3379712_C	3379712	741	G	C	1406	Rv3021c	PPE47	GCC/GCG	247	A/A	Syn	Miscellaneous feature
mtbs3379718_C	3379718	735	T	C	1400	Rv3021c	PPE47	GGA/GGG	245	G/G	Syn	Miscellaneous feature
mtbs3379731_T	3379731	722	G	T	4	Rv3021c	PPE47	GCC/GAC	241	A/D	Nonsyn	Miscellaneous feature
mtbs3379742_C	3379742	711	T	C	1434	Rv3021c	PPE47	GTA/GTG	237	V/V	Syn	Miscellaneous feature
mtbs3379751_C	3379751	702	A	C	1562	Rv3021c	PPE47	GTT/GTG	234	V/V	Syn	Miscellaneous feature
mtbs3379757_C	3379757	696	A	C	1603	Rv3021c	PPE47	GCT/GCG	232	A/A	Syn	Miscellaneous feature
mtbs3379763_A	3379763	690	G	A	1621	Rv3021c	PPE47	GCC/GCT	230	A/A	Syn	Miscellaneous feature
mtbs3379784_A	3379784	669	C	A	1665	Rv3021c	PPE47	GGG/GGT	223	G/G	Syn	Miscellaneous feature
mtbs3379788_G	3379788	665	C	G	1662	Rv3021c	PPE47	GGG/GCG	222	G/A	Nonsyn	Miscellaneous feature
mtbs3380534_G	3380534	149	A	G	698	Rv3022c	PPE48	GTG/GCG	50	V/A	Nonsyn	Miscellaneous feature
mtbs3401871_G	3401871	48	A	G	1464	Rv3041c		GCT/GCC	16	A/A	Syn	Coding region
mtbs3402816_T	3402816	347	C	T	1785	Rv3042c	serB2	GGA/GAA	116	G/E	Nonsyn	Coding region
mtbs3404376_G	3404376	546	C	G	1256	Rv3043c	ctaD	ACG/ACC	182	T/T	Syn	Coding region
mtbs3408150_C	3408150	157	T	C	778	Rv3047c		ACA/GCA	53	T/A	Nonsyn	Coding region
mtbs3412611_C	3412611	1556	T	C	748	Rv3051c	nrdE	CAG/CGG	519	Q/R	Nonsyn	Coding region
mtbs3420825_G	3420825	1334	A	G	999	Rv3059	cyp136	GAC/GGC	445	D/G	Nonsyn	Coding region
mtbs3425854_T	3425854	271	C	T	1995	Rv3062	ligB	CCG/TCG	91	P/S	Nonsyn	Coding region
mtbs3428917_A	3428917	1675	C	A	1906	Rv3063	cstA	CGT/AGT	559	R/S	Nonsyn	Coding region
mtbs3440464_G	3440464	924	T	G	2010	Rv3077		CGT/CGG	308	R/R	Syn	Coding region
mtbs3440468_C	3440468	928	G	C	2025	Rv3077		GGC/CGC	310	G/R	Nonsyn	Coding region
mtbs3446699_G	3446699	660	C	G	861	Rv3081		TTC/TTG	220	F/L	Nonsyn	Coding region
mtbs3446917_T	3446917	878	C	T	1	Rv3081		GCG/GTG	293	A/V	Nonsyn	Coding region
mtbs3447293_G	3447293	3447293	T	G	723
mtbs3450725_C	3450725	729	T	C	1414	Rv3084	lipR	GTT/GTC	243	V/V	Syn	Coding region
mtbs3454263_G	3454263	1339	C	G	1039	Rv3087		CTC/GTC	447	L/V	Nonsyn	Coding region
mtbs3455686_C	3455686	1347	G	C	1305	Rv3088	tgs4	CTG/CTC	449	L/L	Syn	Coding region
mtbs3456666_G	3456666	906	A	G	1987	Rv3089	fadD13	GCA/GCG	302	A/A	Syn	Coding region
mtbs3462135_C	3462135	630	G	C	2100	Rv3093c		TGC/TGG	210	C/W	Nonsyn	Coding region
mtbs3466919_G	3466919	173	C	G	986	Rv3097c	lipY	GGC/GCC	58	G/A	Nonsyn	Coding region
mtbs3467465_G	3467465	198	C	G	951	Rv3098c		GCG/GCC	66	A/A	Syn	Coding region
mtbs3477942_G	3477942	294	A	G	739	Rv3109	moaA1	ACA/ACG	98	T/T	Syn	Coding region
mtbs3480474_A	3480474	401	G	A	1198	Rv3113		GGA/GAA	134	G/E	Nonsyn	Coding region
mtbs3480789_C	3480789	31	T	C	1055	Rv3114		TCA/CCA	11	S/P	Nonsyn	Coding region
mtbs3482717_G	3482717	6	A	G	543			CGT/CGC	2	R/R	Syn	Repeat region
mtbs3484126_A	3484126	153	G	A	701	Rv3117	cysA3	CTG/CTA	51	L/L	Syn	Coding region
mtbs3486288_C	3486288	3486288	G	C	1
mtbs3486977_G	3486977	469	A	G	1848	Rv3121	cyp141	AAA/GAA	157	K/E	Nonsyn	Coding region
mtbs3487108_T	3487108	600	C	T	740	Rv3121	cyp141	GCC/GCT	200	A/A	Syn	Coding region
mtbs3498198_T	3498198	1068	C	T	745	Rv3132c	devS	GAG/GAA	356	E/E	Syn	Coding region
mtbs3500149_A	3500149	601	G	A	768	Rv3134c		CTG/TTG	201	L/L	Syn	Coding region
mtbs3500243_C	3500243	507	G	C	887	Rv3134c		GCC/GCG	169	A/A	Syn	Coding region
mtbs3503895_T	3503895	503	C	T	2024	Rv3137		CCG/CTG	168	P/L	Nonsyn	Coding region
mtbs3508970_G	3508970	876	A	G	866	Rv3141	fadB4	GAA/GAG	292	E/E	Syn	Coding region
mtbs3509626_A	3509626	3509626	C	A	722
mtbs3510120_G	3510120	1198	T	G	1062	Rv3144c	PPE52	AAG/CAG	400	K/Q	Nonsyn	Coding region
mtbs3518167_G	3518167	1422	A	G	2109	Rv3151	nuoG	ATA/ATG	474	I/M	Nonsyn	Coding region
mtbs3518555_G	3518555	1810	A	G	2090	Rv3151	nuoG	ACG/GCG	604	T/A	Nonsyn	Coding region
mtbs3529067_C	3529067	97	G	C	1182	Rv3159c	PPE53	CGT/GGT	33	R/G	Nonsyn	Coding region
mtbs3530955_G	3530955	184	C	G	1028	Rv3161c		GTC/CTC	62	V/L	Nonsyn	Coding region
mtbs3542049_A	3542049	3542049	G	A	738
mtbs3542219_A	3542219	82	G	A	737	Rv3174		GGT/AGT	28	G/S	Nonsyn	Coding region
mtbs3543031_A	3543031	172	G	A	539	Rv3175		GCC/ACC	58	A/T	Nonsyn	Coding region
mtbs3550347_T	3550347	3550347	C	T	733
mtbs3550789_G	3550789	75	C	G	780	Rv3183		GCC/GCG	25	A/A	Syn	Coding region
mtbs3556275_G	3556275	413	A	G	1757	Rv3190c		CTG/CCG	138	L/P	Nonsyn	Coding region
mtbs3571828_C	3571828	716	G	C	752	Rv3199c	nudC	CCG/CGG	239	P/R	Nonsyn	Coding region
mtbs3576231_C	3576231	806	T	C	853	Rv3201c		CAG/CGG	269	Q/R	Nonsyn	Coding region
mtbs3577497_T	3577497	2704	C	T	790	Rv3202c		GAA/AAA	902	E/K	Nonsyn	Coding region
mtbs3581414_G	3581414	100	A	G	1904	Rv3204		ACA/GCA	34	T/A	Nonsyn	Coding region
mtbs3587446_A	3587446	94	G	A	771	Rv3210c		CTG/TTG	32	L/L	Syn	Coding region
mtbs3591063_C	3591063	430	T	C	1981	Rv3213c		AAG/GAG	144	K/E	Nonsyn	Coding region
mtbs3597249_G	3597249	286	C	G	768	Rv3220c		GGC/CGC	96	G/R	Nonsyn	Coding region
mtbs3597879_C	3597879	3597879	T	C	63
mtbs3600576_T	3600576	726	C	T	882	Rv3224		TGC/TGT	242	C/C	Syn	Coding region
mtbs3604821_C	3604821	96	G	C	2292	Rv3228		GCG/GCC	32	A/A	Syn	Coding region
mtbs3610941_A	3610941	249	G	A	2	Rv3234c	tgs3	CAC/CAT	83	H/H	Syn	Coding region
mtbs3612813_C	3612813	304	T	C	811	Rv3236c		ACG/GCG	102	T/A	Nonsyn	Coding region
mtbs3614982_C	3614982	2622	T	C	1733	Rv3239c		CTA/CTG	874	L/L	Syn	Coding region
mtbs3621423_G	3621423	3621423	A	G	1191
mtbs3622441_C	3622441	651	A	C	2130	Rv3243c		GTT/GTG	217	V/V	Syn	Coding region
mtbs3625065_G	3625065	1549	T	G	1951	Rv3245c	mtrB	ATG/CTG	517	M/L	Nonsyn	Coding region
mtbs3626562_A	3626562	52	G	A	876	Rv3245c	mtrB	CCG/TCG	18	P/S	Nonsyn	Coding region
mtbs3628520_A	3628520	1128	G	A	767	Rv3248c	sahH	TCC/TCT	376	S/S	Syn	Coding region
mtbs3638093_A	3638093	617	G	A	1035	Rv3257c	pmmA	TCG/TTG	206	S/L	Nonsyn	Coding region
mtbs3643985_C	3643985	809	A	C	745	Rv3263		GAG/GCG	270	E/A	Nonsyn	Coding region
mtbs3653988_A	3653988	541	G	A	917	Rv3272		GTG/ATG	181	V/M	Nonsyn	Coding region
mtbs3664457_A	3664457	239	C	A	749	Rv3282		GCC/GAC	80	A/D	Nonsyn	Coding region
mtbs3665753_A	3665753	826	G	A	761	Rv3283	sseA	GAG/AAG	276	E/K	Nonsyn	Coding region
mtbs3670040_T	3670040	372	C	T	984	Rv3289c		GCG/GCA	124	A/A	Syn	Coding region
mtbs3674157_A	3674157	556	T	A	865	Rv3293	pcd	TGC/AGC	186	C/S	Nonsyn	Coding region
mtbs3675504_T	3675504	492	G	T	734	Rv3294c		ATC/ATA	164	I/I	Syn	Coding region
mtbs3678249_C	3678249	1475	A	C	834	Rv3296	lhr	AAG/ACG	492	K/T	Nonsyn	Coding region
mtbs3680932_A	3680932	4158	G	A	851	Rv3296	lhr	CCG/CCA	1386	P/P	Syn	Coding region
mtbs3681548_C	3681548	229	A	C	1032	Rv3297	nei	AGG/CGG	77	R/R	Syn	Coding region
mtbs3689523_T	3689523	1416	G	T	2047	Rv3303c	lpdA	TGC/TGA	472	C/Stop	Nonsyn	Coding region
mtbs3690016_G	3690016	923	A	G	1099	Rv3303c	lpdA	TTG/TCG	308	L/S	Nonsyn	Coding region
mtbs3693681_C	3693681	309	A	C	1074	Rv3306c	amiB1	GCT/GCG	103	A/A	Syn	Coding region
mtbs3704596_C	3704596	160	G	C	1843	Rv3317	sdhD	GTG/CTG	54	V/L	Nonsyn	Coding region
mtbs3704770_G	3704770	334	A	G	803	Rv3317	sdhD	ACC/GCC	112	T/A	Nonsyn	Coding region
mtbs3712372_G	3712372	624	A	G	362	Rv3327		CTA/CTG	208	L/L	Syn	Coding region
mtbs3714211_T	3714211	122	G	T	2014	Rv3328c	sigJ	CCG/CAG	41	P/Q	Nonsyn	Coding region
mtbs3714757_C	3714757	366	A	C	1812	Rv3329		CAA/CAC	122	Q/H	Nonsyn	Coding region
mtbs3718357_T	3718357	1268	C	T	2014	Rv3331	sugI	CCG/CTG	423	P/L	Nonsyn	Coding region
mtbs3719409_A	3719409	815	C	A	1	Rv3332	nagA	GCG/GAG	272	A/E	Nonsyn	Coding region
mtbs3721806_C	3721806	795	G	C	2028	Rv3335c		GGC/GGG	265	G/G	Syn	Coding region
mtbs3723401_A	3723401	231	G	A	64	Rv3336c	trpS	ATC/ATT	77	I/I	Syn	Coding region
mtbs3730466_G	3730466	6470	A	G	1186	Rv3343c	PPE54	ATC/ACC	2157	I/T	Nonsyn	Coding region
mtbs3730519_G	3730519	6417	C	G	1105	Rv3343c	PPE54	ACG/ACC	2139	T/T	Syn	Coding region
mtbs3730616_A	3730616	6320	G	A	869	Rv3343c	PPE54	GCC/GTC	2107	A/V	Nonsyn	Coding region
mtbs3730642_A	3730642	6294	G	A	1258	Rv3343c	PPE54	AAC/AAT	2098	N/N	Syn	Coding region
mtbs3730993_G	3730993	5943	A	G	774	Rv3343c	PPE54	GGT/GGC	1981	G/G	Syn	Coding region
mtbs3732310_A	3732310	4626	G	A	169	Rv3343c	PPE54	AAC/AAT	1542	N/N	Syn	Coding region
mtbs3732344_A	3732344	4592	G	A	521	Rv3343c	PPE54	GCC/GTC	1531	A/V	Nonsyn	Coding region
mtbs3732517_G	3732517	4419	A	G	717	Rv3343c	PPE54	ATT/ATC	1473	I/I	Syn	Coding region
mtbs3732525_T	3732525	4411	A	T	751	Rv3343c	PPE54	TTC/ATC	1471	F/I	Nonsyn	Coding region
mtbs3732553_G	3732553	4383	A	G	835	Rv3343c	PPE54	ATT/ATC	1461	I/I	Syn	Coding region
mtbs3732624_G	3732624	4312	A	G	1000	Rv3343c	PPE54	TTG/CTG	1438	L/L	Syn	Coding region
mtbs3735802_G	3735802	1134	C	G	916	Rv3343c	PPE54	ACG/ACC	378	T/T	Syn	Coding region
mtbs3736024_G	3736024	912	A	G	1092	Rv3343c	PPE54	GGT/GGC	304	G/G	Syn	Coding region
mtbs3736628_G	3736628	308	T	G	2307	Rv3343c	PPE54	GAG/GCG	103	E/A	Nonsyn	Coding region
mtbs3741572_A	3741572	1203	G	A	822	Rv3345c	PE_PGRS50	GGC/GGT	401	G/G	Syn	Coding region
mtbs3743656_A	3743656	3743656	G	A	746
mtbs3743899_A	3743899	9286	G	A	838	Rv3347c	PPE55	CTG/TTG	3096	L/L	Syn	Coding region
mtbs3746409_G	3746409	6776	A	G	1727	Rv3347c	PPE55	CTG/CCG	2259	L/P	Nonsyn	Coding region
mtbs3750177_T	3750177	3008	A	T	1030	Rv3347c	PPE55	TTC/TAC	1003	F/Y	Nonsyn	Coding region
mtbs3750178_C	3750178	3007	A	C	1033	Rv3347c	PPE55	TTC/GTC	1003	F/V	Nonsyn	Coding region
mtbs3750185_G	3750185	3000	C	G	970	Rv3347c	PPE55	TCG/TCC	1000	S/S	Syn	Coding region
mtbs3750187_T	3750187	2998	A	T	967	Rv3347c	PPE55	TCG/ACG	1000	S/T	Nonsyn	Coding region
mtbs3750188_G	3750188	2997	C	G	981	Rv3347c	PPE55	ATG/ATC	999	M/I	Nonsyn	Coding region
mtbs3750193_A	3750193	2992	G	A	992	Rv3347c	PPE55	CTC/TTC	998	L/F	Nonsyn	Coding region
mtbs3750205_T	3750205	2980	C	T	1059	Rv3347c	PPE55	GAC/AAC	994	D/N	Nonsyn	Coding region
mtbs3750209_G	3750209	2976	A	G	1065	Rv3347c	PPE55	AAT/AAC	992	N/N	Syn	Coding region
mtbs3750210_G	3750210	2975	T	G	1062	Rv3347c	PPE55	AAT/ACT	992	N/T	Nonsyn	Coding region
mtbs3750407_C	3750407	2778	G	C	975	Rv3347c	PPE55	GGC/GGG	926	G/G	Syn	Coding region
mtbs3750417_T	3750417	2768	A	T	972	Rv3347c	PPE55	TTC/TAC	923	F/Y	Nonsyn	Coding region
mtbs3750421_C	3750421	2764	T	C	974	Rv3347c	PPE55	AGC/GGC	922	S/G	Nonsyn	Coding region
mtbs3752207_G	3752207	978	A	G	1588	Rv3347c	PPE55	ATT/ATC	326	I/I	Syn	Coding region
mtbs3753116_T	3753116	69	C	T	1513	Rv3347c	PPE55	CCG/CCA	23	P/P	Syn	Coding region
mtbs3753164_G	3753164	21	T	G	1627	Rv3347c	PPE55	CCA/CCC	7	P/P	Syn	Coding region
mtbs3754508_C	3754508	526	G	C	752	Rv3349c		CTC/GTC	176	L/V	Nonsyn	Coding region
mtbs3761169_T	3761169	5934	C	T	538	Rv3350c	PPE56	GCG/GCA	1978	A/A	Syn	Coding region
mtbs3761191_G	3761191	5912	A	G	780	Rv3350c	PPE56	GTC/GCC	1971	V/A	Nonsyn	Coding region
mtbs3761854_G	3761854	5249	A	G	1	Rv3350c	PPE56	TTG/TCG	1750	L/S	Nonsyn	Coding region
mtbs3762013_C	3762013	5090	A	C	767	Rv3350c	PPE56	CTC/CGC	1697	L/R	Nonsyn	Coding region
mtbs3775409_C	3775409	2093	T	C	853	Rv3365c		CAG/CGG	698	Q/R	Nonsyn	Coding region
mtbs3775441_C	3775441	2061	A	C	874	Rv3365c		AGT/AGG	687	S/R	Nonsyn	Coding region
mtbs3777389_A	3777389	113	G	A	64	Rv3365c		CCG/CTG	38	P/L	Nonsyn	Coding region
mtbs3778011_A	3778011	275	G	A	832	Rv3366	spoU	CGG/CAG	92	R/Q	Nonsyn	Coding region
mtbs3778012_T	3778012	276	G	T	834	Rv3366	spoU	CGG/CGT	92	R/R	Syn	Coding region
mtbs3778396_T	3778396	3778396	C	T	730
mtbs3798095_C	3798095	395	A	C	1894	Rv3383c	idsB	GTC/GGC	132	V/G	Nonsyn	Coding region
mtbs3798596_G	3798596	3798596	A	G	712
mtbs3804299_A	3804299	493	G	A	815	Rv3389c	htdY	CCC/TCC	165	P/S	Nonsyn	Coding region
mtbs3811672_T	3811672	3811672	G	T	719
mtbs3811675_G	3811675	3811675	A	G	718
mtbs3813266_T	3813266	813	C	T	719	Rv3396c	guaA	GTG/GTA	271	V/V	Syn	Coding region
mtbs3815477_T	3815477	630	G	T	1226	Rv3398c	idsA1	GCC/GCA	210	A/A	Syn	Coding region
mtbs3817117_A	3817117	989	C	A	2122	Rv3399		GCG/GAG	330	A/E	Nonsyn	Coding region
mtbs3821845_T	3821845	47	G	T	873	Rv3402c		GCA/GAA	16	A/E	Nonsyn	Coding region
mtbs3823159_T	3823159	705	A	T	1855	Rv3403c		GTT/GTA	235	V/V	Syn	Coding region
mtbs3826501_T	3826501	250	C	T	728	Rv3407	vapB47	CGC/TGC	84	R/C	Nonsyn	Coding region
mtbs3826684_T	3826684	137	C	T	1888	Rv3408	vapC47	TCG/TTG	46	S/L	Nonsyn	Coding region
mtbs3829770_C	3829770	141	T	C	1930	Rv3410c	guaB3	CCA/CCG	47	P/P	Syn	Coding region
mtbs3830349_T	3830349	1171	C	T	849	Rv3411c	guaB2	GCG/ACG	391	A/T	Nonsyn	Coding region
mtbs3830695_G	3830695	825	A	G	1060	Rv3411c	guaB2	GCT/GCC	275	A/A	Syn	Coding region
mtbs3834486_C	3834486	36	T	C	738	Rv3415c		CAA/CAG	12	Q/Q	Syn	Coding region
mtbs3838871_G	3838871	192	A	G	2070	Rv3420c	rimI	GCT/GCC	64	A/A	Syn	Coding region
mtbs3841790_G	3841790	287	A	G	631	Rv3424c		GTG/GCG	96	V/A	Nonsyn	Coding region
mtbs3842620_G	3842620	382	A	G	1378	Rv3425	PPE57	ACT/GCT	128	T/A	Nonsyn	Coding region
mtbs3842625_G	3842625	387	A	G	1390	Rv3425	PPE57	CCA/CCG	129	P/P	Syn	Coding region
mtbs3844992_A	3844992	979	T	A	1472			AGC/TGC	327	S/C	Nonsyn	Mobile element
mtbs3845695_T	3845695	276	C	T	1043			CGG/CGA	92	R/R	Syn	Mobile element
mtbs3846791_G	3846791	3846791	A	G	742
mtbs3846857_A	3846857	3846857	G	A	277
mtbs3846860_G	3846860	3846860	T	G	237
mtbs3846866_A	3846866	3846866	C	A	135
mtbs3846886_T	3846886	3846886	A	T	10
mtbs3846897_G	3846897	3846897	T	G	29
mtbs3847215_C	3847215	51	T	C	818	Rv3429	PPE59	GGT/GGC	17	G/G	Syn	Coding region
mtbs3847221_C	3847221	57	T	C	806	Rv3429	PPE59	GGT/GGC	19	G/G	Syn	Coding region
mtbs3847235_T	3847235	71	C	T	737	Rv3429	PPE59	TCT/TTT	24	S/F	Nonsyn	Coding region
mtbs3847237_T	3847237	73	G	T	733	Rv3429	PPE59	GCC/TCC	25	A/S	Nonsyn	Coding region
mtbs3847238_T	3847238	74	C	T	733	Rv3429	PPE59	GCC/GTC	25	A/V	Nonsyn	Coding region
mtbs3851887_C	3851887	1327	A	C	1132	Rv3433c		TCG/GCG	443	S/A	Nonsyn	Coding region
mtbs3851888_C	3851888	1326	T	C	1132	Rv3433c		GCA/GCG	442	A/A	Syn	Coding region
mtbs3857226_T	3857226	316	G	T	65	Rv3437		GAC/TAC	106	D/Y	Nonsyn	Coding region
mtbs3859893_T	3859893	84	C	T	2083	Rv3440c		GAG/GAA	28	E/E	Syn	Coding region
mtbs3863138_A	3863138	127	G	A	788	Rv3445c	esxU	CCG/TCG	43	P/S	Nonsyn	Coding region
mtbs3863681_G	3863681	851	C	G	809	Rv3446c		CGG/CCG	284	R/P	Nonsyn	Coding region
mtbs3864995_C	3864995	3244	T	C	1812	Rv3447c	eccC4	AGC/GGC	1082	S/G	Nonsyn	Coding region
mtbs3870010_G	3870010	259	A	G	951	Rv3449	mycP4	ACC/GCC	87	T/A	Nonsyn	Coding region
mtbs3871246_C	3871246	1251	T	C	1187	Rv3450c	eccB4	GGA/GGG	417	G/G	Syn	Coding region
mtbs3877421_G	3877421	12	A	G	1866	Rv3456c	rplQ	CCT/CCC	4	P/P	Syn	Coding region
mtbs3883178_C	3883178	345	A	C	733	Rv3465	rmlC	GAA/GAC	115	E/D	Nonsyn	Coding region
mtbs3883796_T	3883796	247	G	T	839			GGC/TGC	83	G/C	Nonsyn	Repeat region
mtbs3883797_A	3883797	248	G	A	851			GGC/GAC	83	G/D	Nonsyn	Repeat region
mtbs3884906_G	3884906	943	A	G	1562	Rv3467		AAA/GAA	315	K/E	Nonsyn	Coding region
mtbs3885886_C	3885886	184	T	C	1895	Rv3468c		ATC/GTC	62	I/V	Nonsyn	Coding region
mtbs3892671_G	3892671	1050	A	G	1847	Rv3476c	kgtP	GTT/GTC	350	V/V	Syn	Coding region
mtbs3893480_A	3893480	241	G	A	1056	Rv3476c	kgtP	CTT/TTT	81	L/F	Nonsyn	Coding region
mtbs3894732_G	3894732	307	A	G	930	Rv3478	PPE60	AGG/GGG	103	R/G	Nonsyn	Coding region
mtbs3895585_T	3895585	1160	C	T	813	Rv3478	PPE60	CCC/CTC	387	P/L	Nonsyn	Coding region
mtbs3895727_A	3895727	3895727	C	A	940
mtbs3896340_G	3896340	521	T	G	1950	Rv3479		CTC/CGC	174	L/R	Nonsyn	Coding region
mtbs3898408_G	3898408	2589	A	G	1946	Rv3479		GCA/GCG	863	A/A	Syn	Coding region
mtbs3906311_A	3906311	697	G	A	752	Rv3487c	lipF	CGT/TGT	233	R/C	Nonsyn	Coding region
mtbs3908465_G	3908465	230	A	G	787	Rv3490	otsA	GAA/GGA	77	E/G	Nonsyn	Coding region
mtbs3909235_C	3909235	1000	G	C	1070	Rv3490	otsA	GTG/CTG	334	V/L	Nonsyn	Coding region
mtbs3916386_T	3916386	571	G	T	733	Rv3497c	mce4C	CGT/AGT	191	R/S	Nonsyn	Coding region
mtbs3934699_A	3934699	3695	G	A	1565	Rv3508	PE_PGRS54	AGC/AAC	1232	S/N	Nonsyn	Coding region
mtbs3934733_C	3934733	3729	G	C	1029	Rv3508	PE_PGRS54	GGG/GGC	1243	G/G	Syn	Coding region
mtbs3934734_A	3934734	3730	G	A	1017	Rv3508	PE_PGRS54	GCC/ACC	1244	A/T	Nonsyn	Coding region
mtbs3952308_A	3952308	163	C	A	754	Rv3515c	fadD19	GAC/TAC	55	D/Y	Nonsyn	Coding region
mtbs3952800_A	3952800	257	G	A	2021	Rv3516	echA19	GGC/GAC	86	G/D	Nonsyn	Coding region
mtbs3958403_G	3958403	883	A	G	1780	Rv3521		AAC/GAC	295	N/D	Nonsyn	Coding region
mtbs3959418_T	3959418	971	C	T	1920	Rv3522	ltp4	ACC/ATC	324	T/I	Nonsyn	Coding region
mtbs3959730_C	3959730	202	T	C	834	Rv3523	ltp3	TTC/CTC	68	F/L	Nonsyn	Coding region
mtbs3962187_A	3962187	138	G	A	779	Rv3525c		GAC/GAT	46	D/D	Syn	Coding region
mtbs3964518_A	3964518	675	G	A	753	Rv3528c		CCC/CCT	225	P/P	Syn	Coding region
mtbs3968006_C	3968006	939	A	C	744	Rv3531c		TTT/TTG	313	F/L	Nonsyn	Coding region
mtbs3970594_G	3970594	3970594	C	G	741
mtbs3976595_T	3976595	1227	G	T	749	Rv3537	kstD	AGG/AGT	409	R/S	Nonsyn	Coding region
mtbs3979990_G	3979990	670	C	G	796	Rv3540c	ltp2	GTG/CTG	224	V/L	Nonsyn	Coding region
mtbs3981983_A	3981983	1158	G	A	862	Rv3543c	fadE29	CCC/CCT	386	P/P	Syn	Coding region
mtbs3984321_A	3984321	1125	G	A	979	Rv3545c	cyp125	CAC/CAT	375	H/H	Syn	Coding region
mtbs3993058_A	3993058	374	G	A	834	Rv3554	fdxB	GGG/GAG	125	G/E	Nonsyn	Coding region
mtbs4001622_C	4001622	4001622	T	C	750
mtbs4005114_C	4005114	824	G	C	1100	Rv3563	fadE32	TGG/TCG	275	W/S	Nonsyn	Coding region
mtbs4005607_C	4005607	361	T	C	1951	Rv3564	fadE33	TTG/CTG	121	L/L	Syn	Coding region
mtbs4008747_G	4008747	536	A	G	1024	Rv3567c	hsaB	ATC/ACC	179	I/T	Nonsyn	Coding region
mtbs4022388_A	4022388	6	G	A	788	Rv3579c		CCC/CCT	2	P/P	Syn	Coding region
mtbs4024273_C	4024273	75	T	C	1926	Rv3581c	ispF	GTA/GTG	25	V/V	Syn	Coding region
mtbs4026899_A	4026899	456	G	A	2059	Rv3585	radA	CAG/CAA	152	Q/Q	Syn	Coding region
mtbs4028752_G	4028752	862	A	G	1001	Rv3586		ACG/GCG	288	T/A	Nonsyn	Coding region
mtbs4032218_A	4032218	941	G	A	907	Rv3590c	PE_PGRS58	GCT/GTT	314	A/V	Nonsyn	Coding region
mtbs4032625_T	4032625	534	G	T	873	Rv3590c	PE_PGRS58	GGC/GGA	178	G/G	Syn	Coding region
mtbs4033577_G	4033577	466	A	G	770	Rv3591c		TTC/CTC	156	F/L	Nonsyn	Coding region
mtbs4034827_T	4034827	476	C	T	2096	Rv3593	lpqF	GCG/GTG	159	A/V	Nonsyn	Coding region
mtbs4037283_G	4037283	768	T	G	2096	Rv3595c	PE_PGRS59	GGA/GGC	256	G/G	Syn	Coding region
mtbs4041581_T	4041581	1360	C	T	756	Rv3598c	lysS	GCG/ACG	454	A/T	Nonsyn	Coding region
mtbs4046007_T	4046007	112	C	T	720	Rv3603c		GTG/ATG	38	V/M	Nonsyn	Coding region
mtbs4050811_A	4050811	2073	G	A	848	Rv3610c	ftsH	TAC/TAT	691	Y/Y	Syn	Coding region
mtbs4053050_G	4053050	56	A	G	484			GTT/GCT	19	V/A	Nonsyn	Repeat region
mtbs4055801_A	4055801	575	G	A	1855	Rv3616c	espA	ACC/ATC	192	T/I	Nonsyn	Coding region
mtbs4056416_A	4056416	4056416	C	A	899
mtbs4056693_T	4056693	4056693	G	T	722
mtbs4059143_C	4059143	446	A	C	850	Rv3618		GAG/GCG	149	E/A	Nonsyn	Coding region
mtbs4059904_G	4059904	4059904	A	G	1933
mtbs4060100_A	4060100	169	G	A	1274	Rv3619c	esxV	CTG/TTG	57	L/L	Syn	Coding region
mtbs4060201_A	4060201	68	G	A	1259	Rv3619c	esxV	TCG/TTG	23	S/L	Nonsyn	Coding region
mtbs4060210_A	4060210	59	T	A	1258	Rv3619c	esxV	CAG/CTG	20	Q/L	Nonsyn	Coding region
mtbs4060230_A	4060230	39	G	A	1233	Rv3619c	esxV	CAC/CAT	13	H/H	Syn	Coding region
mtbs4060588_C	4060588	4	T	C	779	Rv3620c	esxW	ACC/GCC	2	T/A	Nonsyn	Coding region
mtbs4068468_A	4068468	587	C	A	533	Rv3629c		GGT/GTT	196	G/V	Nonsyn	Coding region
mtbs4069292_A	4069292	118	G	A	1901	Rv3630		GCC/ACC	40	A/T	Nonsyn	Coding region
mtbs4089058_C	4089058	278	T	C	1045	Rv3649		CTC/CCC	93	L/P	Nonsyn	Coding region
mtbs4095295_C	4095295	6	T	C	1026	Rv3655c		GAA/GAG	2	E/E	Syn	Coding region
mtbs4100975_C	4100975	4100975	T	C	1978
mtbs4107074_C	4107074	11	T	C	1010	Rv3666c	dppA	CAG/CGG	4	Q/R	Nonsyn	Coding region
mtbs4111303_C	4111303	477	G	C	1899	Rv3669		GTG/GTC	159	V/V	Syn	Coding region
mtbs4112429_C	4112429	1087	T	C	1005	Rv3671c		ATC/GTC	363	I/V	Nonsyn	Coding region
mtbs4115890_C	4115890	5	G	C	753	Rv3674c	nth	CCC/CGC	2	P/R	Nonsyn	Coding region
mtbs4116610_A	4116610	133	G	A	765	Rv3676	crp	GAT/AAT	45	D/N	Nonsyn	Coding region
mtbs4120390_C	4120390	596	G	C	746	Rv3680		GGA/GCA	199	G/A	Nonsyn	Coding region
mtbs4121112_A	4121112	4121112	C	A	521
mtbs4122287_T	4122287	372	G	T	887	Rv3682	ponA2	GCG/GCT	124	A/A	Syn	Coding region
mtbs4123770_A	4123770	1855	G	A	832	Rv3682	ponA2	GCG/ACG	619	A/T	Nonsyn	Coding region
mtbs4133316_T	4133316	799	A	T	892	Rv3691		ACG/TCG	267	T/S	Nonsyn	Coding region
mtbs4137829_T	4137829	624	C	T	809	Rv3695		GCC/GCT	208	A/A	Syn	Coding region
mtbs4145737_G	4145737	1155	A	G	1060	Rv3703c		TAT/TAC	385	Y/Y	Syn	Coding region
mtbs4151855_G	4151855	363	A	G	1301	Rv3708c	asd	CCT/CCC	121	P/P	Syn	Coding region
mtbs4156099_A	4156099	631	C	A	2046	Rv3711c	dnaQ	GTG/TTG	211	V/L	Nonsyn	Coding region
mtbs4156503_T	4156503	227	C	T	1053	Rv3711c	dnaQ	GGC/GAC	76	G/D	Nonsyn	Coding region
mtbs4158493_T	4158493	267	C	T	781	Rv3713	cobQ2	ATC/ATT	89	I/I	Syn	Coding region
mtbs4159195_C	4159195	627	T	C	1477	Rv3714c		CCA/CCG	209	P/P	Syn	Coding region
mtbs4160371_A	4160371	130	C	A	753	Rv3715c	recR	GGT/TGT	44	G/C	Nonsyn	Coding region
mtbs4162339_G	4162339	34	A	G	1888	Rv3719		ACG/GCG	12	T/A	Nonsyn	Coding region
mtbs4165589_A	4165589	1143	G	A	33	Rv3721c	dnaZX	ACC/ACT	381	T/T	Syn	Coding region
mtbs4166441_A	4166441	291	G	A	913	Rv3721c	dnaZX	CAC/CAT	97	H/H	Syn	Coding region
mtbs4167656_G	4167656	473	A	G	759	Rv3722c		ATG/ACG	158	M/T	Nonsyn	Coding region
mtbs4169852_T	4169852	247	G	T	865	Rv3724B	cut5b	GCG/TCG	83	A/S	Nonsyn	Coding region
mtbs4170739_C	4170739	526	G	C	978	Rv3725		GTC/CTC	176	V/L	Nonsyn	Coding region
mtbs4174131_C	4174131	1177	G	C	745	Rv3727		GGA/CGA	393	G/R	Nonsyn	Coding region
mtbs4176297_T	4176297	1425	G	T	1	Rv3728		GTG/GTT	475	V/V	Syn	Coding region
mtbs4179089_T	4179089	805	C	T	1000	Rv3729		CCG/TCG	269	P/S	Nonsyn	Coding region
mtbs4179832_C	4179832	1548	G	C	758	Rv3729		CAG/CAC	516	Q/H	Nonsyn	Coding region
mtbs4182387_C	4182387	630	G	C	773	Rv3731	ligC	GTG/GTC	210	V/V	Syn	Coding region
mtbs4182695_A	4182695	938	G	A	1918	Rv3731	ligC	CGC/CAC	313	R/H	Nonsyn	Coding region
mtbs4186678_A	4186678	45	G	A	779	Rv3736		CTG/CTA	15	L/L	Syn	Coding region
mtbs4187485_C	4187485	852	T	C	1818	Rv3736		GCT/GCC	284	A/A	Syn	Coding region
mtbs4187817_G	4187817	119	A	G	2106	Rv3737		GAT/GGT	40	D/G	Nonsyn	Coding region
mtbs4189210_T	4189210	1512	G	T	857	Rv3737		CCG/CCT	504	P/P	Syn	Coding region
mtbs4194501_A	4194501	873	G	A	848	Rv3743c	ctpJ	TTC/TTT	291	F/F	Syn	Coding region
mtbs4202370_T	4202370	244	C	T	1	Rv3756c	proZ	GTG/ATG	82	V/M	Nonsyn	Coding region
mtbs4204168_C	4204168	250	T	C	766	Rv3758c	proV	AAC/GAC	84	N/D	Nonsyn	Coding region
mtbs4204441_G	4204441	933	A	G	1835	Rv3759c	proX	CAT/CAC	311	H/H	Syn	Coding region
mtbs4205120_G	4205120	254	A	G	1245	Rv3759c	proX	CTG/CCG	85	L/P	Nonsyn	Coding region
mtbs4205325_G	4205325	49	A	G	780	Rv3759c	proX	TGG/CGG	17	W/R	Nonsyn	Coding region
mtbs4210274_G	4210274	736	A	G	1945	Rv3764c	tcrY	TGT/CGT	246	C/R	Nonsyn	Coding region
mtbs4214988_A	4214988	4214988	G	A	713
mtbs4215433_T	4215433	343	C	T	692	Rv3770c		GCG/ACG	115	A/T	Nonsyn	Coding region
mtbs4215484_C	4215484	292	G	C	977	Rv3770c		CCC/GCC	98	P/A	Nonsyn	Coding region
mtbs4217557_G	4217557	424	A	G	966	Rv3772	hisC2	ACG/GCG	142	T/A	Nonsyn	Coding region
mtbs4218416_A	4218416	410	C	A	756	Rv3773c		GGG/GTG	137	G/V	Nonsyn	Coding region
mtbs4218941_A	4218941	93	G	A	745	Rv3774	echA21	GGG/GGA	31	G/G	Syn	Coding region
mtbs4221423_T	4221423	335	C	T	800	Rv3776		TCG/TTG	112	S/L	Nonsyn	Coding region
mtbs4221490_G	4221490	402	C	G	2030	Rv3776		CTC/CTG	134	L/L	Syn	Coding region
mtbs4222073_G	4222073	985	A	G	2230	Rv3776		ATG/GTG	329	M/V	Nonsyn	Coding region
mtbs4222882_G	4222882	189	A	G	1979	Rv3777		CTA/CTG	63	L/L	Syn	Coding region
mtbs4223172_C	4223172	479	T	C	1523	Rv3777		GTC/GCC	160	V/A	Nonsyn	Coding region
mtbs4229167_C	4229167	821	T	C	856	Rv3782	glfT1	GTG/GCG	274	V/A	Nonsyn	Coding region
mtbs4234960_C	4234960	181	A	C	774	Rv3788		ATC/CTC	61	I/L	Nonsyn	Coding region
mtbs4236237_T	4236237	459	C	T	750	Rv3790	dprE1	ACC/ACT	153	T/T	Syn	Coding region
mtbs4238675_T	4238675	744	C	T	537	Rv3792	aftA	GGC/GGT	248	G/G	Syn	Coding region
mtbs4242643_T	4242643	2781	C	T	2135	Rv3793	embC	CGC/CGT	927	R/R	Syn	Coding region
mtbs4243460_T	4243460	228	C	T	780	Rv3794	embA	TGC/TGT	76	C/C	Syn	Coding region
mtbs4247429_G	4247429	916	A	G	151	Rv3795	embB	ATG/GTG	306	M/V	Nonsyn	Coding region
mtbs4251297_C	4251297	213	G	C	980	Rv3797	fadE35	GGG/GGC	71	G/G	Syn	Coding region
mtbs4252066_C	4252066	982	T	C	773	Rv3797	fadE35	TCG/CCG	328	S/P	Nonsyn	Coding region
mtbs4254006_T	4254006	71	G	T	596			TGC/TTC	24	C/F	Nonsyn	Sequence-Tagged Site
mtbs4254039_C	4254039	104	T	C	579			GTA/GCA	35	V/A	Nonsyn	Sequence-Tagged Site
mtbs4254290_G	4254290	355	T	G	933			TGC/GGC	119	C/G	Nonsyn	Sequence-Tagged Site
mtbs4254431_A	4254431	496	G	A	771			GTC/ATC	166	V/I	Nonsyn	Sequence-Tagged Site
mtbs4255922_G	4255922	27	A	G	1913	Rv3799c	accD4	CAT/CAC	9	H/H	Syn	Coding region
mtbs4256210_T	4256210	4937	G	T	803	Rv3800c	pks13	GCC/GAC	1646	A/D	Nonsyn	Coding region
mtbs4257220_G	4257220	3927	A	G	1782	Rv3800c	pks13	CGT/CGC	1309	R/R	Syn	Coding region
mtbs4258106_A	4258106	3041	G	A	739	Rv3800c	pks13	ACG/ATG	1014	T/M	Nonsyn	Coding region
mtbs4262388_T	4262388	679	C	T	860	Rv3801c	fadD32	GGC/AGC	227	G/S	Nonsyn	Coding region
mtbs4267647_C	4267647	1190	T	C	867	Rv3805c	aftB	GAC/GGC	397	D/G	Nonsyn	Coding region
mtbs4274541_A	4274541	803	C	A	533	Rv3810	pirG	CCC/CAC	268	P/H	Nonsyn	Coding region
mtbs4280708_A	4280708	81	G	A	782	Rv3815c		GTC/GTT	27	V/V	Syn	Coding region
mtbs4284429_A	4284429	1397	G	A	739	Rv3820c	papA2	CCA/CTA	466	P/L	Nonsyn	Coding region
mtbs4287164_G	4287164	444	A	G	959	Rv3822		GGA/GGG	148	G/G	Syn	Coding region
mtbs4290135_T	4290135	1395	C	T	741	Rv3823c	mmpL8	CTG/CTA	465	L/L	Syn	Coding region
mtbs4296015_A	4296015	3591	G	A	1220	Rv3825c	pks2	GAC/GAT	1197	D/D	Syn	Coding region
mtbs4301075_C	4301075	1264	G	C	763	Rv3826	fadD23	GAA/CAA	422	E/Q	Nonsyn	Coding region
mtbs4302036_C	4302036	754	T	C	1983	Rv3827c		ACG/GCG	252	T/A	Nonsyn	Coding region
mtbs4306155_T	4306155	399	C	T	1939	Rv3831		AGC/AGT	133	S/S	Syn	Coding region
mtbs4307179_A	4307179	313	G	A	1824	Rv3833		GTC/ATC	105	V/I	Nonsyn	Coding region
mtbs4308395_A	4308395	520	G	A	788	Rv3834c	serS	CTG/TTG	174	L/L	Syn	Coding region
mtbs4309927_G	4309927	881	T	G	796	Rv3835		CTC/CGC	294	L/R	Nonsyn	Coding region
mtbs4311664_T	4311664	44	C	T	764	Rv3837c		GGC/GAC	15	G/D	Nonsyn	Coding region
mtbs4313128_T	4313128	364	C	T	1024	Rv3839		CCC/TCC	122	P/S	Nonsyn	Coding region
mtbs4314645_G	4314645	468	A	G	1282	Rv3841	bfrB	CTA/CTG	156	L/L	Syn	Coding region
mtbs4314800_A	4314800	3	G	A	907	RVnc0044	ncrMT3949	GTG/GTA	1	V/V	Syn	Non-coding RNA
mtbs4319985_C	4319985	4319985	G	C	739
mtbs4326533_A	4326533	941	G	A	18	Rv3854c	ethA	ACC/ATC	314	T/I	Nonsyn	Coding region
mtbs4329782_A	4329782	4329782	G	A	922
mtbs4338732_A	4338732	4338732	G	A	1656
mtbs4340028_C	4340028	4340028	G	C	753
mtbs4350305_A	4350305	1479	G	A	777	Rv3871	eccCb1	CCG/CCA	493	P/P	Syn	Coding region
mtbs4351039_T	4351039	295	G	T	1887	Rv3872	PE35	GAA/TAA	99	E/Stop	Nonsyn	Coding region
mtbs4356110_C	4356110	1104	G	C	1877	Rv3877	eccD1	CTG/CTC	368	L/L	Syn	Coding region
mtbs4357597_G	4357597	2186	C	G	1397	Rv3879c	espK	TGC/TCC	729	C/S	Nonsyn	Coding region
mtbs4357804_G	4357804	1979	T	G	777	Rv3879c	espK	GAG/GCG	660	E/A	Nonsyn	Coding region
mtbs4359653_T	4359653	130	C	T	763	Rv3879c	espK	GAT/AAT	44	D/N	Nonsyn	Coding region
mtbs4359828_A	4359828	4359828	G	A	732
mtbs4362568_G	4362568	853	T	G	823	Rv3882c	eccE1	AGA/CGA	285	R/R	Syn	Coding region
mtbs4366195_C	4366195	644	T	C	1455	Rv3884c	eccA2	GAG/GGG	215	E/G	Nonsyn	Coding region
mtbs4366272_C	4366272	567	G	C	2093	Rv3884c	eccA2	GCC/GCG	189	A/A	Syn	Coding region
mtbs4368084_C	4368084	438	G	C	841	Rv3885c	eccE2	GTC/GTG	146	V/V	Syn	Coding region
mtbs4372353_C	4372353	354	G	C	1031	Rv3888c		CGC/CGG	118	R/R	Syn	Coding region
mtbs4375628_T	4375628	56	G	T	1878	Rv3892c	PPE69	ACG/AAG	19	T/K	Nonsyn	Coding region
mtbs4378504_C	4378504	1949	T	C	747	Rv3894c	eccC2	GAT/GGT	650	D/G	Nonsyn	Coding region
mtbs4379680_G	4379680	773	C	G	1965	Rv3894c	eccC2	CGC/CCC	258	R/P	Nonsyn	Coding region
mtbs4382054_C	4382054	798	T	C	2088	Rv3896c		GCA/GCG	266	A/A	Syn	Coding region
mtbs4382275_T	4382275	577	G	T	2041	Rv3896c		CAA/AAA	193	Q/K	Nonsyn	Coding region
mtbs4383655_G	4383655	331	A	G	1034	Rv3898c		TAG/CAG	111	Stop/Q	Nonsyn	Coding region
mtbs4384007_G	4384007	4384007	C	G	934
mtbs4386228_C	4386228	81	T	C	1361	Rv3900c		CTA/CTG	27	L/L	Syn	Coding region
mtbs4390427_A	4390427	6	C	A	1	Rv3903c		GCG/GCT	2	A/A	Syn	Coding region
mtbs4393178_G	4393178	4393178	A	G	1287
mtbs4393590_G	4393590	142	C	G	790	Rv3908	mutT4	CGG/GGG	48	R/G	Nonsyn	Coding region
mtbs4397736_T	4397736	1140	C	T	877	Rv3910		ATC/ATT	380	I/I	Syn	Coding region
mtbs4407588_C	4407588	615	T	C	1009	Rv3919c	gid	GCA/GCG	205	A/A	Syn	Coding region
mtbs4407927_G	4407927	276	T	G	772	Rv3919c	gid	GAA/GAC	92	E/D	Nonsyn	Coding region
mtbs4408923_T	4408923	4408923	C	T	962

## Sheet: 1405_snp
Supplementary Material
Genomic analysis of multidrug resistant Mycobacterium tuberculosis strains from patients in Kazakhstan
Supplementary file S5 – List of genetic variants (SNPs and Indels) filtered by GMTV database.
4_1405.vcf
SNP ID	Position in genome	Position in gene	Ref	Alt	# of samples	Locus tag	Gene	Codon	Codon Number	Amin acid	Effect	Genome Region
	657016	454	T	C	0	Rv0565c		TAC/TGC	152	NULL	Nonsyn	Coding region
	723109	1904	C	T	0	Rv0630c	recB	CTG/CTA	635	NULL	Syn	Coding region
	1094034	322	A	T	0	Rv0978c	PE_PGRS17	GTT/GAT	108	NULL	Nonsyn	Coding region
	1094056	300	G	T	0	Rv0978c	PE_PGRS17	CTC/ATC	101	NULL	Nonsyn	Coding region
	1762046	302	C	T	0	Rv1557	mmpL6	AAC/AAT	101	NULL	Syn	Coding region
	2738790	896	G	C	0	Rv2440c	obg	GCC/GCG	299	NULL	Syn	Coding region
	3293269	3084	C	T	0	Rv2946c	pks1	GCC/ACC	1029	NULL	Nonsyn	Coding region
	3968925	19	C	G	0	Rv3531c		CGC/CCC	7	NULL	Nonsyn	Coding region
	4088470	61	T	C	0	Rv3648c	cspA	GAA/GGA	21	NULL	Nonsyn	Coding region
	4272678	797	C	G	0	Rv3809c	glf	GAG/GAC	266	NULL	Nonsyn	Coding region
	4320515	4320515	T	G	0			NULL	NULL	NULL	NULL	intergenic
mtbs0001849_A	1849	1849	C	A	816
mtbs0001977_G	1977	1977	A	G	1854
mtbs0004013_C	4013	734	T	C	1870	Rv0003	recF	ATC/ACC	245	I/T	Nonsyn	Coding region
mtbs0007362_C	7362	61	G	C	1917	Rv0006	gyrA	GAG/CAG	21	E/Q	Nonsyn	Coding region
mtbs0007585_C	7585	284	G	C	1808	Rv0006	gyrA	AGC/ACC	95	S/T	Nonsyn	Coding region
mtbs0009304_A	9304	2003	G	A	1841	Rv0006	gyrA	GGC/GAC	668	G/D	Nonsyn	Coding region
mtbs0011820_G	11820	11820	C	G	735
mtbs0011879_G	11879	433	A	G	2032	Rv0008c		TCC/CCC	145	S/P	Nonsyn	Coding region
mtbs0014785_C	14785	697	T	C	1895	Rv0012		TGC/CGC	233	C/R	Nonsyn	Coding region
mtbs0014861_T	14861	773	G	T	757	Rv0012		GGC/GTC	258	G/V	Nonsyn	Coding region
mtbs0015117_G	15117	204	C	G	974	Rv0013	trpG	ATC/ATG	68	I/M	Nonsyn	Coding region
mtbs0016119_A	16119	1352	C	A	757	Rv0014c	pknB	CGC/CTC	451	R/L	Nonsyn	Coding region
mtbs0017654_G	17654	1109	T	G	805	Rv0015c	pknA	CAG/CCG	370	Q/P	Nonsyn	Coding region
mtbs0017657_C	17657	1106	T	C	808	Rv0015c	pknA	CAG/CGG	369	Q/R	Nonsyn	Coding region
mtbs0021795_A	21795	1387	G	A	2248	Rv0018c	pstP	CCG/TCG	463	P/S	Nonsyn	Coding region
mtbs0025610_C	25610	25610	G	C	742
mtbs0026959_G	26959	26959	C	G	1968
mtbs0034044_C	34044	34044	T	C	1849
mtbs0035608_T	35608	1314	C	T	754	Rv0032	bioF2	GCC/GCT	438	A/A	Syn	Coding region
mtbs0036008_C	36008	1714	G	C	811	Rv0032	bioF2	GAC/CAC	572	D/H	Nonsyn	Coding region
mtbs0037031_G	37031	165	C	G	1912	Rv0034		GCC/GCG	55	A/A	Syn	Coding region
mtbs0037305_G	37305	47	C	G	769	Rv0035	fadD34	TCG/TGG	16	S/W	Nonsyn	Coding region
mtbs0037334_T	37334	76	A	T	749	Rv0035	fadD34	ACT/TCT	26	T/S	Nonsyn	Coding region
mtbs0039030_T	39030	39030	C	T	700
mtbs0039158_G	39158	672	C	G	846	Rv0036c		CGG/CGC	224	R/R	Syn	Coding region
mtbs0042227_A	42227	125	G	A	66	Rv0039c		ACG/ATG	42	T/M	Nonsyn	Coding region
mtbs0042281_A	42281	71	C	A	1073	Rv0039c		TGC/TTC	24	C/F	Nonsyn	Coding region
mtbs0042967_C	42967	399	G	C	2040	Rv0040c	mtc28	CCC/CCG	133	P/P	Syn	Coding region
mtbs0044768_G	44768	1207	A	G	770	Rv0041	leuS	AGG/GGG	403	R/G	Nonsyn	Coding region
mtbs0048503_C	48503	525	T	C	777	Rv0044c		CGA/CGG	175	R/R	Syn	Coding region
mtbs0049360_T	49360	580	C	T	876	Rv0045c		GTC/ATC	194	V/I	Nonsyn	Coding region
mtbs0050557_C	50557	568	T	C	1255	Rv0046c	ino1	AGG/GGG	190	R/G	Nonsyn	Coding region
mtbs0051949_G	51949	749	A	G	1223	Rv0048c		GTC/GCC	250	V/A	Nonsyn	Coding region
mtbs0054394_G	54394	732	A	G	1254	Rv0050	ponA1	GCA/GCG	244	A/A	Syn	Coding region
mtbs0062049_G	62049	1654	A	G	2156	Rv0058	dnaB	AGG/GGG	552	R/G	Nonsyn	Coding region
mtbs0063146_T	63146	63146	G	T	724
mtbs0065150_T	65150	201	C	T	757	Rv0061c		TGG/TGA	67	W/Stop	Nonsyn	Coding region
mtbs0069989_A	69989	1370	G	A	2045	Rv0064		GGT/GAT	457	G/D	Nonsyn	Coding region
mtbs0070267_T	70267	1648	G	T	950	Rv0064		GTC/TTC	550	V/F	Nonsyn	Coding region
mtbs0070816_G	70816	2197	A	G	2022	Rv0064		AAC/GAC	733	N/D	Nonsyn	Coding region
mtbs0071336_C	71336	2717	G	C	2339	Rv0064		CGC/CCC	906	R/P	Nonsyn	Coding region
mtbs0075233_A	75233	75233	C	A	890
mtbs0075940_C	75940	640	G	C	1976	Rv0068		GTG/CTG	214	V/L	Nonsyn	Coding region
mtbs0079480_C	79480	79480	T	C	774
mtbs0087468_T	87468	334	C	T	789	Rv0078A		GAG/AAG	112	E/K	Nonsyn	Coding region
mtbs0092199_G	92199	1800	T	G	2040	Rv0083		ACT/ACG	600	T/T	Syn	Coding region
mtbs0094388_A	94388	438	G	A	771	Rv0086	hycQ	GGG/GGA	146	G/G	Syn	Coding region
mtbs0096894_T	96894	96894	C	T	712
mtbs0097350_C	97350	424	A	C	736	Rv0088		AGG/CGG	142	R/R	Syn	Coding region
mtbs0101539_T	101539	957	C	T	804	Rv0092	ctpA	GGC/GGT	319	G/G	Syn	Coding region
mtbs0103756_T	103756	908	G	T	692	Rv0094c		CCC/CAC	303	P/H	Nonsyn	Coding region
mtbs0104712_T	104712	504	C	T	527			ACG/ACA	168	T/T	Syn	Repeat region
mtbs0104767_T	104767	449	C	T	151			CGC/CAC	150	R/H	Nonsyn	Repeat region
mtbs0104773_T	104773	443	C	T	121			TGG/TAG	148	W/Stop	Nonsyn	Repeat region
mtbs0104775_G	104775	441	A	G	128			CGT/CGC	147	R/R	Syn	Repeat region
mtbs0104782_A	104782	434	G	A	53			GCG/GTG	145	A/V	Nonsyn	Repeat region
mtbs0104785_G	104785	431	A	G	62			CTG/CCG	144	L/P	Nonsyn	Repeat region
mtbs0104791_T	104791	425	C	T	28			CGC/CAC	142	R/H	Nonsyn	Repeat region
mtbs0104794_T	104794	422	C	T	26			GGG/GAG	141	G/E	Nonsyn	Repeat region
mtbs0104800_A	104800	416	T	A	7			AAC/ATC	139	N/I	Nonsyn	Repeat region
mtbs0104801_G	104801	415	T	G	8			AAC/CAC	139	N/H	Nonsyn	Repeat region
mtbs0104803_T	104803	413	C	T	9			GGC/GAC	138	G/D	Nonsyn	Repeat region
mtbs0104806_G	104806	410	T	G	6			TAG/TCG	137	Stop/S	Nonsyn	Repeat region
mtbs0104817_G	104817	399	T	G	124			GAA/GAC	133	E/D	Nonsyn	Repeat region
mtbs0104824_A	104824	392	C	A	649			AGC/ATC	131	S/I	Nonsyn	Repeat region
mtbs0104830_A	104830	386	C	A	454			CGA/CTA	129	R/L	Nonsyn	Repeat region
mtbs0104833_G	104833	383	C	G	516			GGC/GCC	128	G/A	Nonsyn	Repeat region
mtbs0104838_G	104838	378	T	G	756			GAA/GAC	126	E/D	Nonsyn	Repeat region
mtbs0104856_T	104856	360	C	T	813			CTG/CTA	120	L/L	Syn	Repeat region
mtbs0104858_A	104858	358	G	A	813			CTG/TTG	120	L/L	Syn	Repeat region
mtbs0104936_C	104936	280	T	C	1134			ACG/GCG	94	T/A	Nonsyn	Repeat region
mtbs0104944_A	104944	272	G	A	1234			GCC/GTC	91	A/V	Nonsyn	Repeat region
mtbs0104962_A	104962	254	G	A	1415			GCG/GTG	85	A/V	Nonsyn	Repeat region
mtbs0105007_G	105007	209	C	G	850			AGC/ACC	70	S/T	Nonsyn	Repeat region
mtbs0105011_A	105011	205	G	A	844			CTG/TTG	69	L/L	Syn	Repeat region
mtbs0105021_A	105021	195	G	A	837			TCC/TCT	65	S/S	Syn	Repeat region
mtbs0105045_C	105045	171	G	C	1444			GAC/GAG	57	D/E	Nonsyn	Repeat region
mtbs0105139_A	105139	77	C	A	718			GGG/GTG	26	G/V	Nonsyn	Repeat region
mtbs0105736_C	105736	413	T	C	892	Rv0096	PPE1	GTC/GCC	138	V/A	Nonsyn	Coding region
mtbs0116000_G	116000	6000	T	G	2024	Rv0101	nrp	GTT/GTG	2000	V/V	Syn	Coding region
mtbs0122109_G	122109	65	A	G	2132	Rv0103c	ctpB	TTG/TCG	22	L/S	Nonsyn	Coding region
mtbs0123454_T	123454	1138	C	T	749	Rv0104		CAA/TAA	380	Q/Stop	Nonsyn	Coding region
mtbs0123520_C	123520	1204	T	C	958	Rv0104		TAT/CAT	402	Y/H	Nonsyn	Coding region
mtbs0132417_G	132417	1036	C	G	2347	Rv0109	PE_PGRS1	CGC/GGC	346	R/G	Nonsyn	Coding region
mtbs0133839_T	133839	133839	C	T	1866
mtbs0135329_T	135329	1380	C	T	789	Rv0111		CCC/CCT	460	P/P	Syn	Coding region
mtbs0139297_T	139297	785	G	T	768	Rv0115	hddA	GGC/GTC	262	G/V	Nonsyn	Coding region
mtbs0139850_A	139850	139850	T	A	64
mtbs0141623_A	141623	424	G	A	730	Rv0117	oxyS	GAT/AAT	142	D/N	Nonsyn	Coding region
mtbs0143207_C	143207	670	T	C	996	Rv0118c	oxcA	AGC/GGC	224	S/G	Nonsyn	Coding region
mtbs0146087_C	146087	1685	T	C	1977	Rv0120c	fusA2	AAT/AGT	562	N/S	Nonsyn	Coding region
mtbs0146236_G	146236	1536	C	G	809	Rv0120c	fusA2	GCG/GCC	512	A/A	Syn	Coding region
mtbs0147262_T	147262	510	G	T	759	Rv0120c	fusA2	GAC/GAA	170	D/E	Nonsyn	Coding region
mtbs0151798_G	151798	651	A	G	65	Rv0125	pepA	GGA/GGG	217	G/G	Syn	Coding region
mtbs0154283_C	154283	52	T	C	2034	Rv0127	mak	TCG/CCG	18	S/P	Nonsyn	Coding region
mtbs0163467_G	163467	102	A	G	65	Rv0136	cyp138	TCA/TCG	34	S/S	Syn	Coding region
mtbs0163705_T	163705	340	C	T	854	Rv0136	cyp138	CCT/TCT	114	P/S	Nonsyn	Coding region
mtbs0163706_T	163706	341	C	T	852	Rv0136	cyp138	CCT/CTT	114	P/L	Nonsyn	Coding region
mtbs0166565_G	166565	739	A	G	713	Rv0139		ATC/GTC	247	I/V	Nonsyn	Coding region
mtbs0177857_A	177857	1453	G	A	2259	Rv0151c	PE1	CTG/TTG	485	L/L	Syn	Coding region
mtbs0182824_A	182824	375	G	A	782	Rv0154c	fadE2	ATC/ATT	125	I/I	Syn	Coding region
mtbs0183091_G	183091	108	C	G	788	Rv0154c	fadE2	CCG/CCC	36	P/P	Syn	Coding region
mtbs0188800_C	188800	40	T	C	2130	Rv0159c	PE3	ACG/GCG	14	T/A	Nonsyn	Coding region
mtbs0190816_C	190816	210	A	C	808	Rv0161		TCA/TCC	70	S/S	Syn	Coding region
mtbs0194681_C	194681	135	G	C	1900	Rv0165c	mce1R	CTC/CTG	45	L/L	Syn	Coding region
mtbs0195682_G	195682	690	C	G	770	Rv0166	fadD5	GTC/GTG	230	V/V	Syn	Coding region
mtbs0196642_T	196642	1650	C	T	1684	Rv0166	fadD5	AAC/AAT	550	N/N	Syn	Coding region
mtbs0199470_G	199470	937	T	G	1009	Rv0169	mce1A	TCC/GCC	313	S/A	Nonsyn	Coding region
mtbs0202898_G	202898	423	A	G	9	Rv0172	mce1D	GTA/GTG	141	V/V	Syn	Coding region
mtbs0203038_C	203038	563	T	C	747	Rv0172	mce1D	ATC/ACC	188	I/T	Nonsyn	Coding region
mtbs0204094_T	204094	30	G	T	757	Rv0173	lprK	GTG/GTT	10	V/V	Syn	Coding region
mtbs0206339_C	206339	1109	T	C	2004	Rv0174	mce1F	CTG/CCG	370	L/P	Nonsyn	Coding region
mtbs0206481_G	206481	1251	C	G	1145	Rv0174	mce1F	CCC/CCG	417	P/P	Syn	Coding region
mtbs0206484_T	206484	1254	G	T	1148	Rv0174	mce1F	GGG/GGT	418	G/G	Syn	Coding region
mtbs0208590_C	208590	174	A	C	692	Rv0177		CGA/CGC	58	R/R	Syn	Coding region
mtbs0213147_A	213147	994	C	A	766	Rv0182c	sigG	GAC/TAC	332	D/Y	Nonsyn	Coding region
mtbs0213281_T	213281	860	C	T	781	Rv0182c	sigG	GGC/GAC	287	G/D	Nonsyn	Coding region
mtbs0215977_T	215977	263	C	T	807	Rv0185		GCG/GTG	88	A/V	Nonsyn	Coding region
mtbs0217201_C	217201	933	T	C	995	Rv0186	bglS	AAT/AAC	311	N/N	Syn	Coding region
mtbs0220545_A	220545	1179	G	A	9	Rv0189c	ilvD	CAC/CAT	393	H/H	Syn	Coding region
mtbs0222925_A	222925	637	G	A	815	Rv0191		GCT/ACT	213	A/T	Nonsyn	Coding region
mtbs0223942_C	223942	379	T	C	2289	Rv0192		TCG/CCG	127	S/P	Nonsyn	Coding region
mtbs0225323_C	225323	1249	T	C	1992	Rv0193c		AAG/GAG	417	K/E	Nonsyn	Coding region
mtbs0227098_C	227098	221	T	C	1904	Rv0194		ATG/ACG	74	M/T	Nonsyn	Coding region
mtbs0228459_T	228459	1582	C	T	9	Rv0194		CGC/TGC	528	R/C	Nonsyn	Coding region
mtbs0230170_T	230170	3293	C	T	792	Rv0194		CCC/CTC	1098	P/L	Nonsyn	Coding region
mtbs0231114_G	231114	216	C	G	1774	Rv0195		GCC/GCG	72	A/A	Syn	Coding region
mtbs0234477_G	234477	2247	T	G	2287	Rv0197		TAT/TAG	749	Y/Stop	Nonsyn	Coding region
mtbs0249522_C	249522	485	T	C	1095	Rv0209		GTG/GCG	162	V/A	Nonsyn	Coding region
mtbs0251575_A	251575	1456	G	A	1025	Rv0210		GCG/ACG	486	A/T	Nonsyn	Coding region
mtbs0261869_C	261869	946	T	C	2307	Rv0218		TGT/CGT	316	C/R	Nonsyn	Coding region
mtbs0262268_T	262268	15	A	T	884	Rv0219		GCA/GCT	5	A/A	Syn	Coding region
mtbs0264129_A	264129	63	G	A	758	Rv0221		ATG/ATA	21	M/I	Nonsyn	Coding region
mtbs0265554_C	265554	48	A	C	1853	Rv0222	echA1	GTA/GTC	16	V/V	Syn	Coding region
mtbs0267751_C	267751	14	G	C	766	Rv0223c		GCC/GGC	5	A/G	Nonsyn	Coding region
mtbs0270430_C	270430	1135	G	C	856	Rv0226c		CCT/GCT	379	P/A	Nonsyn	Coding region
mtbs0278021_C	278021	123	T	C	817	Rv0232		CGT/CGC	41	R/R	Syn	Coding region
mtbs0278681_G	278681	97	C	G	1980	Rv0233	nrdB	CAT/GAT	33	H/D	Nonsyn	Coding region
mtbs0282892_T	282892	3960	C	T	840	Rv0236c	aftD	ACG/ACA	1320	T/T	Syn	Coding region
mtbs0283610_A	283610	3242	G	A	885	Rv0236c	aftD	GCC/GTC	1081	A/V	Nonsyn	Coding region
mtbs0283614_C	283614	3238	T	C	2089	Rv0236c	aftD	AGC/GGC	1080	S/G	Nonsyn	Coding region
mtbs0285772_C	285772	1080	A	C	2245	Rv0236c	aftD	CCT/CCG	360	P/P	Syn	Coding region
mtbs0285871_G	285871	981	A	G	2129	Rv0236c	aftD	GTT/GTC	327	V/V	Syn	Coding region
mtbs0288260_T	288260	1075	C	T	752	Rv0237	lpqI	CTG/TTG	359	L/L	Syn	Coding region
mtbs0296312_T	296312	308	C	T	741	Rv0245		TCC/TTC	103	S/F	Nonsyn	Coding region
mtbs0297030_A	297030	222	G	A	9	Rv0246		GCG/GCA	74	A/A	Syn	Coding region
mtbs0304923_G	304923	2058	A	G	1246	Rv0252	nirB	AAA/AAG	686	K/K	Syn	Coding region
mtbs0305188_T	305188	2323	G	T	749	Rv0252	nirB	GTG/TTG	775	V/L	Nonsyn	Coding region
mtbs0305615_G	305615	163	T	G	9	Rv0253	nirD	TCC/GCC	55	S/A	Nonsyn	Coding region
mtbs0310973_A	310973	545	G	A	2036	Rv0259c		GCG/GTG	182	A/V	Nonsyn	Coding region
mtbs0311613_T	311613	1047	G	T	1937	Rv0260c		GTC/GTA	349	V/V	Syn	Coding region
mtbs0311889_T	311889	771	C	T	712	Rv0260c		ACG/ACA	257	T/T	Syn	Coding region
mtbs0325505_C	325505	939	T	C	963	Rv0270	fadD2	GTT/GTC	313	V/V	Syn	Coding region
mtbs0325703_T	325703	1137	C	T	65	Rv0270	fadD2	GGC/GGT	379	G/G	Syn	Coding region
mtbs0333892_C	333892	2419	G	C	1969	Rv0278c	PE_PGRS3	CGC/GGC	807	R/G	Nonsyn	Coding region
mtbs0336535_G	336535	336535	T	G	49
mtbs0336537_G	336537	336537	T	G	37
mtbs0336540_T	336540	336540	G	T	28
mtbs0336546_G	336546	336546	T	G	25
mtbs0336560_C	336560	2514	T	C	16	Rv0279c	PE_PGRS4	TAA/TAG	838	Stop/Stop	Syn	Coding region
mtbs0336590_C	336590	2484	G	C	55	Rv0279c	PE_PGRS4	ATC/ATG	828	I/M	Nonsyn	Coding region
mtbs0336592_G	336592	2482	T	G	53	Rv0279c	PE_PGRS4	ATC/CTC	828	I/L	Nonsyn	Coding region
mtbs0336611_C	336611	2463	G	C	54	Rv0279c	PE_PGRS4	GCC/GCG	821	A/A	Syn	Coding region
mtbs0336617_C	336617	2457	G	C	57	Rv0279c	PE_PGRS4	CCC/CCG	819	P/P	Syn	Coding region
mtbs0336620_C	336620	2454	T	C	59	Rv0279c	PE_PGRS4	ACA/ACG	818	T/T	Syn	Coding region
mtbs0336698_G	336698	2376	C	G	213	Rv0279c	PE_PGRS4	GGG/GGC	792	G/G	Syn	Coding region
mtbs0336701_G	336701	2373	A	G	506	Rv0279c	PE_PGRS4	GGT/GGC	791	G/G	Syn	Coding region
mtbs0336707_A	336707	2367	G	A	547	Rv0279c	PE_PGRS4	GAC/GAT	789	D/D	Syn	Coding region
mtbs0336708_C	336708	2366	T	C	773	Rv0279c	PE_PGRS4	GAC/GGC	789	D/G	Nonsyn	Coding region
mtbs0336710_G	336710	2364	A	G	785	Rv0279c	PE_PGRS4	GCT/GCC	788	A/A	Syn	Coding region
mtbs0336728_A	336728	2346	G	A	110	Rv0279c	PE_PGRS4	GGC/GGT	782	G/G	Syn	Coding region
mtbs0338561_A	338561	513	G	A	686	Rv0279c	PE_PGRS4	GCC/GCT	171	A/A	Syn	Coding region
mtbs0338618_G	338618	456	C	G	990	Rv0279c	PE_PGRS4	GGG/GGC	152	G/G	Syn	Coding region
mtbs0338719_C	338719	355	T	C	230	Rv0279c	PE_PGRS4	ACC/GCC	119	T/A	Nonsyn	Coding region
mtbs0338768_A	338768	306	G	A	111	Rv0279c	PE_PGRS4	ATC/ATT	102	I/I	Syn	Coding region
mtbs0338774_A	338774	300	G	A	111	Rv0279c	PE_PGRS4	GCC/GCT	100	A/A	Syn	Coding region
mtbs0338775_T	338775	299	G	T	110	Rv0279c	PE_PGRS4	GCC/GAC	100	A/D	Nonsyn	Coding region
mtbs0338777_C	338777	297	G	C	111	Rv0279c	PE_PGRS4	CTC/CTG	99	L/L	Syn	Coding region
mtbs0338810_C	338810	264	G	C	195	Rv0279c	PE_PGRS4	GCC/GCG	88	A/A	Syn	Coding region
mtbs0338844_G	338844	230	A	G	1286	Rv0279c	PE_PGRS4	GTG/GCG	77	V/A	Nonsyn	Coding region
mtbs0338845_T	338845	229	C	T	1239	Rv0279c	PE_PGRS4	GTG/ATG	77	V/M	Nonsyn	Coding region
mtbs0338876_A	338876	198	G	A	1165	Rv0279c	PE_PGRS4	AGC/AGT	66	S/S	Syn	Coding region
mtbs0338903_C	338903	171	G	C	1228	Rv0279c	PE_PGRS4	GCC/GCG	57	A/A	Syn	Coding region
mtbs0338960_C	338960	114	T	C	1254	Rv0279c	PE_PGRS4	GCA/GCG	38	A/A	Syn	Coding region
mtbs0338963_C	338963	111	T	C	1242	Rv0279c	PE_PGRS4	ACA/ACG	37	T/T	Syn	Coding region
mtbs0340132_A	340132	769	G	A	885	Rv0280	PPE3	GAA/AAA	257	E/K	Nonsyn	Coding region
mtbs0340372_C	340372	1009	T	C	2112	Rv0280	PPE3	TCG/CCG	337	S/P	Nonsyn	Coding region
mtbs0342146_C	342146	17	A	C	1036	Rv0282	eccA3	GAA/GCA	6	E/A	Nonsyn	Coding region
mtbs0346275_G	346275	641	C	G	1948	Rv0284	eccC3	CCG/CGG	214	P/R	Nonsyn	Coding region
mtbs0353309_A	353309	227	G	A	778	Rv0290	eccD3	AGC/AAC	76	S/N	Nonsyn	Coding region
mtbs0353365_A	353365	283	G	A	797	Rv0290	eccD3	GCC/ACC	95	A/T	Nonsyn	Coding region
mtbs0356528_G	356528	649	A	G	2072	Rv0292	eccE3	AAT/GAT	217	N/D	Nonsyn	Coding region
mtbs0363464_A	363464	213	G	A	771	Rv0298		CGG/CGA	71	R/R	Syn	Coding region
mtbs0364854_G	364854	250	C	G	745	Rv0302		CAT/GAT	84	H/D	Nonsyn	Coding region
mtbs0372913_C	372913	2799	A	C	1287	Rv0305c	PPE6	GGT/GGG	933	G/G	Syn	Coding region
mtbs0374353_G	374353	1359	A	G	730	Rv0305c	PPE6	CGT/CGC	453	R/R	Syn	Coding region
mtbs0376774_C	376774	282	T	C	1975	Rv0307c		GCA/GCG	94	A/A	Syn	Coding region
mtbs0377014_T	377014	42	C	T	747	Rv0307c		CTG/CTA	14	L/L	Syn	Coding region
mtbs0379528_T	379528	357	G	T	766	Rv0311		GAG/GAT	119	E/D	Nonsyn	Coding region
mtbs0383716_T	383716	115	C	T	905	Rv0315		CCG/TCG	39	P/S	Nonsyn	Coding region
mtbs0384380_C	384380	779	A	C	1943	Rv0315		AAG/ACG	260	K/T	Nonsyn	Coding region
mtbs0386432_G	386432	668	C	G	2061	Rv0318c		GGG/GCG	223	G/A	Nonsyn	Coding region
mtbs0390828_C	390828	424	T	C	2118	Rv0323c		AGT/GGT	142	S/G	Nonsyn	Coding region
mtbs0391853_G	391853	502	A	G	1451	Rv0324		ACT/GCT	168	T/A	Nonsyn	Coding region
mtbs0392261_C	392261	223	T	C	981	Rv0325		TAG/CAG	75	Stop/Q	Nonsyn	Coding region
mtbs0393308_T	393308	738	C	T	9	Rv0327c	cyp135A1	CCG/CCA	246	P/P	Syn	Coding region
mtbs0396199_C	396199	396199	T	C	827
mtbs0401318_G	401318	1127	A	G	190	Rv0336		TAC/TGC	376	Y/C	Nonsyn	Coding region
mtbs0403980_A	403980	1862	G	A	1953	Rv0338c		GCC/GTC	621	A/V	Nonsyn	Coding region
mtbs0404326_C	404326	1516	T	C	1794	Rv0338c		AGG/GGG	506	R/G	Nonsyn	Coding region
mtbs0414486_T	414486	456	C	T	1948	Rv0344c	lpqJ	GAG/GAA	152	E/E	Syn	Coding region
mtbs0420008_G	420008	174	A	G	1910	Rv0350	dnaK	GCA/GCG	58	A/A	Syn	Coding region
mtbs0424981_A	424981	9699	G	A	805	Rv0355c	PPE8	CCC/CCT	3233	P/P	Syn	Coding region
mtbs0428698_T	428698	5982	C	T	963	Rv0355c	PPE8	GCG/GCA	1994	A/A	Syn	Coding region
mtbs0432536_T	432536	2144	C	T	735	Rv0355c	PPE8	GGT/GAT	715	G/D	Nonsyn	Coding region
mtbs0441823_T	441823	477	C	T	799	Rv0363c	fba	GAG/GAA	159	E/E	Syn	Coding region
mtbs0445780_T	445780	746	C	T	1030	Rv0368c		CGT/CAT	249	R/H	Nonsyn	Coding region
mtbs0454295_C	454295	78	T	C	2086	Rv0376c		CCA/CCG	26	P/P	Syn	Coding region
mtbs0454333_G	454333	40	T	G	981	Rv0376c		ACG/CCG	14	T/P	Nonsyn	Coding region
mtbs0456594_C	456594	226	T	C	831	Rv0380c		ATG/GTG	76	M/V	Nonsyn	Coding region
mtbs0457452_G	457452	372	T	G	1926	Rv0381c		ACA/ACC	124	T/T	Syn	Coding region
mtbs0459399_C	459399	459399	A	C	2143
mtbs0460413_T	460413	1590	C	T	753	Rv0384c	clpB	AAG/AAA	530	K/K	Syn	Coding region
mtbs0465300_T	465300	1890	C	T	843	Rv0386		TTC/TTT	630	F/F	Syn	Coding region
mtbs0467516_C	467516	486	G	C	2237	Rv0388c	PPE9	TCC/TCG	162	S/S	Syn	Coding region
mtbs0467526_G	467526	476	C	G	2200	Rv0388c	PPE9	GGG/GCG	159	G/A	Nonsyn	Coding region
mtbs0467546_C	467546	456	G	C	2163	Rv0388c	PPE9	GAC/GAG	152	D/E	Nonsyn	Coding region
mtbs0467557_C	467557	445	A	C	2147	Rv0388c	PPE9	TTG/GTG	149	L/V	Nonsyn	Coding region
mtbs0467564_C	467564	438	A	C	2138	Rv0388c	PPE9	CAT/CAG	146	H/Q	Nonsyn	Coding region
mtbs0467585_C	467585	417	G	C	2105	Rv0388c	PPE9	CAC/CAG	139	H/Q	Nonsyn	Coding region
mtbs0467590_C	467590	412	T	C	2100	Rv0388c	PPE9	ACG/GCG	138	T/A	Nonsyn	Coding region
mtbs0467621_G	467621	381	T	G	2086	Rv0388c	PPE9	GGA/GGC	127	G/G	Syn	Coding region
mtbs0467638_T	467638	364	G	T	2090	Rv0388c	PPE9	CAG/AAG	122	Q/K	Nonsyn	Coding region
mtbs0475178_C	475178	239	T	C	2049	Rv0395		GTC/GCC	80	V/A	Nonsyn	Coding region
mtbs0477234_G	477234	87	T	G	866	Rv0398c		GAA/GAC	29	E/D	Nonsyn	Coding region
mtbs0483935_G	483935	483935	T	G	1225
mtbs0484005_T	484005	29	G	T	694	Rv0404	fadD30	CGT/CTT	10	R/L	Nonsyn	Coding region
mtbs0484596_T	484596	620	C	T	745	Rv0404	fadD30	CCG/CTG	207	P/L	Nonsyn	Coding region
mtbs0489935_C	489935	771	G	C	1718	Rv0406c		ACC/ACG	257	T/T	Syn	Coding region
mtbs0491742_C	491742	960	T	C	945	Rv0407	fgd1	TTT/TTC	320	F/F	Syn	Coding region
mtbs0492150_C	492150	365	G	C	998	Rv0408	pta	GGC/GCC	122	G/A	Nonsyn	Coding region
mtbs0497491_A	497491	810	G	A	785	Rv0411c	glnH	GAC/GAT	270	D/D	Syn	Coding region
mtbs0498531_G	498531	1089	A	G	1034	Rv0412c		GCT/GCC	363	A/A	Syn	Coding region
mtbs0498557_A	498557	1063	C	A	1946	Rv0412c		GAC/TAC	355	D/Y	Nonsyn	Coding region
mtbs0502589_G	502589	224	C	G	2050	Rv0417	thiG	TCC/TGC	75	S/C	Nonsyn	Coding region
mtbs0503354_C	503354	503354	G	C	1834
mtbs0505974_A	505974	889	G	A	1034	Rv0419	lpqM	GCG/ACG	297	A/T	Nonsyn	Coding region
mtbs0513257_C	513257	2065	T	C	1934	Rv0425c	ctpH	ATG/GTG	689	M/V	Nonsyn	Coding region
mtbs0517358_C	517358	446	T	C	1075	Rv0428c		GAC/GGC	149	D/G	Nonsyn	Coding region
mtbs0518987_T	518987	255	C	T	880	Rv0430		CGC/CGT	85	R/R	Syn	Coding region
mtbs0524891_A	524891	500	C	A	1262	Rv0436c	pssA	GGC/GTC	167	G/V	Nonsyn	Coding region
mtbs0533547_G	533547	243	C	G	812	Rv0444c	rskA	GAG/GAC	81	E/D	Nonsyn	Coding region
mtbs0541201_G	541201	291	A	G	1821	Rv0450c	mmpL4	CTT/CTC	97	L/L	Syn	Coding region
mtbs0542014_G	542014	542014	C	G	717
mtbs0542514_G	542514	373	C	G	743	Rv0452		CAT/GAT	125	H/D	Nonsyn	Coding region
mtbs0546357_G	546357	447	A	G	990	Rv0456c	echA2	ACT/ACC	149	T/T	Syn	Coding region
mtbs0549363_G	549363	245	C	G	787	Rv0457c		CGC/CCC	82	R/P	Nonsyn	Coding region
mtbs0551525_C	551525	328	A	C	1949	Rv0459		AGA/CGA	110	R/R	Syn	Coding region
mtbs0555366_T	555366	941	C	T	534	Rv0465c		CGG/CAG	314	R/Q	Nonsyn	Coding region
mtbs0555991_G	555991	316	A	G	1122	Rv0465c		TGC/CGC	106	C/R	Nonsyn	Coding region
mtbs0561776_T	561776	561776	C	T	722
mtbs0561777_T	561777	561777	C	T	719
mtbs0565655_G	565655	565655	A	G	1201
mtbs0572591_T	572591	882	C	T	882	Rv0483	lprQ	GAC/GAT	294	D/D	Syn	Coding region
mtbs0573262_G	573262	540	A	G	2013	Rv0484c		GGT/GGC	180	G/G	Syn	Coding region
mtbs0575907_T	575907	560	C	T	862	Rv0486	mshA	GCA/GTA	187	A/V	Nonsyn	Coding region
mtbs0580772_A	580772	41	T	A	13			GTG/GAG	14	V/E	Nonsyn	Repeat region
mtbs0583171_C	583171	208	A	C	879	Rv0492c		TCG/GCG	70	S/A	Nonsyn	Coding region
mtbs0584171_C	584171	520	T	C	1042	Rv0493c		AGT/GGT	174	S/G	Nonsyn	Coding region
mtbs0590436_C	590436	354	T	C	1962	Rv0500	proC	GCT/GCC	118	A/A	Syn	Coding region
mtbs0597816_G	597816	618	A	G	1714	Rv0507	mmpL2	GCA/GCG	206	A/A	Syn	Coding region
mtbs0598475_A	598475	1277	G	A	1948	Rv0507	mmpL2	CGC/CAC	426	R/H	Nonsyn	Coding region
mtbs0598588_G	598588	1390	A	G	9	Rv0507	mmpL2	AGT/GGT	464	S/G	Nonsyn	Coding region
mtbs0599868_G	599868	2670	A	G	955	Rv0507	mmpL2	CGA/CGG	890	R/R	Syn	Coding region
mtbs0605150_A	605150	549	G	A	749	Rv0512	hemB	CGG/CGA	183	R/R	Syn	Coding region
mtbs0610120_G	610120	610120	T	G	1890
mtbs0611048_G	611048	611048	T	G	736
mtbs0614034_G	614034	997	C	G	9	Rv0522	gabP	CCC/GCC	333	P/A	Nonsyn	Coding region
mtbs0620625_G	620625	735	A	G	760	Rv0529	ccsA	ATA/ATG	245	I/M	Nonsyn	Coding region
mtbs0621598_T	621598	692	C	T	758	Rv0530		CCC/CTC	231	P/L	Nonsyn	Coding region
mtbs0623472_G	623472	680	A	G	2337	Rv0532	PE_PGRS6	GAC/GGC	227	D/G	Nonsyn	Coding region
mtbs0623508_G	623508	716	C	G	2379	Rv0532	PE_PGRS6	GCC/GGC	239	A/G	Nonsyn	Coding region
mtbs0627485_A	627485	238	G	A	926	Rv0536	galE3	GTC/ATC	80	V/I	Nonsyn	Coding region
mtbs0628864_C	628864	868	T	C	775	Rv0537c		ACC/GCC	290	T/A	Nonsyn	Coding region
mtbs0630722_C	630722	683	G	C	2092	Rv0538		CGG/CCG	228	R/P	Nonsyn	Coding region
mtbs0637319_A	637319	145	G	A	1727	Rv0545c	pitA	CCT/TCT	49	P/S	Nonsyn	Coding region
mtbs0640954_G	640954	640954	A	G	744
mtbs0648002_G	648002	44	T	G	1807	Rv0556		CTC/CGC	15	L/R	Nonsyn	Coding region
mtbs0648856_C	648856	321	T	C	1022	Rv0557	mgtA	GGT/GGC	107	G/G	Syn	Coding region
mtbs0655986_G	655986	655986	T	G	949
mtbs0657081_T	657081	390	C	T	869	Rv0565c		GTG/GTA	130	V/V	Syn	Coding region
mtbs0657142_T	657142	329	C	T	750	Rv0565c		CGC/CAC	110	R/H	Nonsyn	Coding region
mtbs0659341_C	659341	659341	T	C	1088
mtbs0662911_C	662911	1617	T	C	1114	Rv0570	nrdZ	GCT/GCC	539	A/A	Syn	Coding region
mtbs0665293_G	665293	91	A	G	1727	Rv0572c		TTC/CTC	31	F/L	Nonsyn	Coding region
mtbs0669033_A	669033	713	T	A	752	Rv0575c		GAC/GTC	238	D/V	Nonsyn	Coding region
mtbs0669398_C	669398	348	T	C	1985	Rv0575c		CAA/CAG	116	Q/Q	Syn	Coding region
mtbs0670545_A	670545	698	G	A	1204	Rv0576		CGC/CAC	233	R/H	Nonsyn	Coding region
mtbs0672491_G	672491	3426	C	G	2111	Rv0578c	PE_PGRS7	GGG/GGC	1142	G/G	Syn	Coding region
mtbs0683829_T	683829	444	C	T	790	Rv0585c		GCG/GCA	148	A/A	Syn	Coding region
mtbs0685461_G	685461	333	C	G	2142	Rv0587	yrbE2A	GCC/GCG	111	A/A	Syn	Coding region
mtbs0685608_C	685608	480	T	C	1810	Rv0587	yrbE2A	CTT/CTC	160	L/L	Syn	Coding region
mtbs0686264_A	686264	337	G	A	740	Rv0588	yrbE2B	GCG/ACG	113	A/T	Nonsyn	Coding region
mtbs0686972_C	686972	152	T	C	1843	Rv0589	mce2A	TTC/TCC	51	F/S	Nonsyn	Coding region
mtbs0690450_C	690450	1392	A	C	1202	Rv0591	mce2C	GCA/GCC	464	A/A	Syn	Coding region
mtbs0690465_G	690465	1407	T	G	2222	Rv0591	mce2C	CTT/CTG	469	L/L	Syn	Coding region
mtbs0694531_G	694531	1295	A	G	842	Rv0594	mce2F	AAC/AGC	432	N/S	Nonsyn	Coding region
mtbs0696917_T	696917	696917	G	T	739
mtbs0698968_A	698968	27	G	A	2167	Rv0601c		GGC/GGT	9	G/G	Syn	Coding region
mtbs0699840_C	699840	699840	A	C	748
mtbs0707334_C	707334	2182	T	C	910	Rv0613c		ACC/GCC	728	T/A	Nonsyn	Coding region
mtbs0712693_G	712693	520	A	G	1433	Rv0619	galTb	ACC/GCC	174	T/A	Nonsyn	Coding region
mtbs0713310_C	713310	595	T	C	1158	Rv0620	galK	TGT/CGT	199	C/R	Nonsyn	Coding region
mtbs0721373_G	721373	360	T	G	841	Rv0629c	recD	GAA/GAC	120	E/D	Nonsyn	Coding region
mtbs0725190_A	725190	3117	G	A	1003	Rv0631c	recC	TTC/TTT	1039	F/F	Syn	Coding region
mtbs0736679_A	736679	525	G	A	9	Rv0642c	mmaA4	GTC/GTT	175	V/V	Syn	Coding region
mtbs0738522_G	738522	639	T	G	782	Rv0644c	mmaA2	GAA/GAC	213	E/D	Nonsyn	Coding region
mtbs0754186_G	754186	224	A	G	2140	Rv0658c		CTC/CCC	75	L/P	Nonsyn	Coding region
mtbs0757139_A	757139	1003	C	A	797	Rv0663	atsD	CGC/AGC	335	R/S	Nonsyn	Coding region
mtbs0757182_G	757182	1046	A	G	1003	Rv0663	atsD	GAC/GGC	349	D/G	Nonsyn	Coding region
mtbs0761155_T	761155	1349	C	T	525	Rv0667	rpoB	TCG/TTG	450	S/L	Nonsyn	Coding region
mtbs0763031_C	763031	3225	T	C	972	Rv0667	rpoB	GCT/GCC	1075	A/A	Syn	Coding region
mtbs0766645_C	766645	3276	A	C	532	Rv0668	rpoC	GAA/GAC	1092	E/D	Nonsyn	Coding region
mtbs0767414_A	767414	767414	G	A	1330
mtbs0767670_C	767670	767670	T	C	64
mtbs0773497_A	773497	375	C	A	801	Rv0673	echA4	TTC/TTA	125	F/L	Nonsyn	Coding region
mtbs0775639_C	775639	2842	T	C	2135	Rv0676c	mmpL5	ATT/GTT	948	I/V	Nonsyn	Coding region
mtbs0776100_A	776100	2381	G	A	993	Rv0676c	mmpL5	ACC/ATC	794	T/I	Nonsyn	Coding region
mtbs0776182_T	776182	2299	C	T	728	Rv0676c	mmpL5	GAC/AAC	767	D/N	Nonsyn	Coding region
mtbs0779615_C	779615	426	G	C	764	Rv0679c		AAC/AAG	142	N/K	Nonsyn	Coding region
mtbs0781395_C	781395	781395	T	C	1963
mtbs0781687_G	781687	128	A	G	322	Rv0682	rpsL	AAG/AGG	43	K/R	Nonsyn	Coding region
mtbs0791249_T	791249	418	C	T	720	Rv0691c		GCC/ACC	140	A/T	Nonsyn	Coding region
mtbs0797736_T	797736	804	C	T	753	Rv0697		CTC/CTT	268	L/L	Syn	Coding region
mtbs0798355_C	798355	1423	G	C	734	Rv0697		GCC/CCC	475	A/P	Nonsyn	Coding region
mtbs0799666_G	799666	38	A	G	790	Rv0699		GAC/GGC	13	D/G	Nonsyn	Coding region
mtbs0806909_G	806909	575	C	G	9	Rv0711	atsA	CCT/CGT	192	P/R	Nonsyn	Coding region
mtbs0811727_T	811727	355	C	T	9	Rv0714	rplN	CCG/TCG	119	P/S	Nonsyn	Coding region
mtbs0811753_T	811753	12	C	T	756	Rv0715	rplX	CAC/CAT	4	H/H	Syn	Coding region
mtbs0820483_T	820483	17	G	T	1832	Rv0727c	fucA	GCC/GAC	6	A/D	Nonsyn	Coding region
mtbs0820752_T	820752	725	C	T	1061	Rv0728c	serA2	CGC/CAC	242	R/H	Nonsyn	Coding region
mtbs0835611_T	835611	458	C	T	786	Rv0745		ACG/ATG	153	T/M	Nonsyn	Coding region
mtbs0836272_G	836272	572	A	G	1989	Rv0746	PE_PGRS9	GAG/GGG	191	E/G	Nonsyn	Coding region
mtbs0836291_G	836291	591	A	G	2013	Rv0746	PE_PGRS9	GGA/GGG	197	G/G	Syn	Coding region
mtbs0836658_G	836658	958	A	G	2283	Rv0746	PE_PGRS9	ACC/GCC	320	T/A	Nonsyn	Coding region
mtbs0837033_G	837033	1333	A	G	2337	Rv0746	PE_PGRS9	ACC/GCC	445	T/A	Nonsyn	Coding region
mtbs0839334_G	839334	884	A	G	1831	Rv0747	PE_PGRS10	AAA/AGA	295	K/R	Nonsyn	Coding region
mtbs0839348_G	839348	898	A	G	1833	Rv0747	PE_PGRS10	AGC/GGC	300	S/G	Nonsyn	Coding region
mtbs0840496_G	840496	2046	C	G	1770	Rv0747	PE_PGRS10	GGC/GGG	682	G/G	Syn	Coding region
mtbs0840794_G	840794	2344	A	G	850	Rv0747	PE_PGRS10	AGC/GGC	782	S/G	Nonsyn	Coding region
mtbs0840795_C	840795	2345	G	C	856	Rv0747	PE_PGRS10	AGC/ACC	782	S/T	Nonsyn	Coding region
mtbs0841764_C	841764	111	G	C	1731	Rv0749A		ACC/ACG	37	T/T	Syn	Coding region
mtbs0842030_T	842030	842030	C	T	717
mtbs0843909_G	843909	506	A	G	65	Rv0752c	fadE9	GTG/GCG	169	V/A	Nonsyn	Coding region
mtbs0847995_C	847995	847995	T	C	1019
mtbs0852910_T	852910	515	C	T	2089	Rv0758	phoR	CCC/CTC	172	P/L	Nonsyn	Coding region
mtbs0854604_T	854604	83	C	T	155	Rv0760c		TGG/TAG	28	W/Stop	Nonsyn	Coding region
mtbs0857696_G	857696	342	A	G	1768	Rv0764c	cyp51	GCT/GCC	114	A/A	Syn	Coding region
mtbs0861216_G	861216	305	T	G	796	Rv0768	aldA	CTC/CGC	102	L/R	Nonsyn	Coding region
mtbs0866051_A	866051	1339	G	A	797	Rv0773c	ggtA	CGC/TGC	447	R/C	Nonsyn	Coding region
mtbs0874593_A	874593	361	G	A	9	Rv0781	ptrBa	GAC/AAC	121	D/N	Nonsyn	Coding region
mtbs0876141_T	876141	1410	G	T	835	Rv0782	ptrBb	ACG/ACT	470	T/T	Syn	Coding region
mtbs0880562_T	880562	1223	G	T	1829	Rv0785		TGC/TTC	408	C/F	Nonsyn	Coding region
mtbs0882257_C	882257	799	T	C	1975	Rv0787		TAC/CAC	267	Y/H	Nonsyn	Coding region
mtbs0892272_A	892272	1002	G	A	532	Rv0799c		CCC/CCT	334	P/P	Syn	Coding region
mtbs0892416_T	892416	858	C	T	744	Rv0799c		GTG/GTA	286	V/V	Syn	Coding region
mtbs0893733_G	893733	416	T	G	2216	Rv0800	pepC	CTG/CGG	139	L/R	Nonsyn	Coding region
mtbs0900221_C	900221	1110	T	C	1771	Rv0806c	cpsY	GTA/GTG	370	V/V	Syn	Coding region
mtbs0903537_T	903537	1427	G	T	940	Rv0808	purF	CGG/CTG	476	R/L	Nonsyn	Coding region
mtbs0903550_C	903550	1440	T	C	1986	Rv0808	purF	GCT/GCC	480	A/A	Syn	Coding region
mtbs0903913_C	903913	189	T	C	2061	Rv0809	purM	GGT/GGC	63	G/G	Syn	Coding region
mtbs0906857_G	906857	435	A	G	2136	Rv0812		ATA/ATG	145	I/M	Nonsyn	Coding region
mtbs0908186_C	908186	298	T	C	853	Rv0814c	sseC2	ACC/GCC	100	T/A	Nonsyn	Coding region
mtbs0909166_T	909166	153	C	T	713	Rv0815c	cysA2	CTG/CTA	51	L/L	Syn	Coding region
mtbs0919351_C	919351	203	A	C	749	Rv0825c		TTC/TGC	68	F/C	Nonsyn	Coding region
mtbs0921813_G	921813	239	C	G	1957	Rv0829		GCA/GGA	80	A/G	Nonsyn	Coding region
mtbs0925453_T	925453	93	C	T	995	Rv0833	PE_PGRS13	GCC/GCT	31	A/A	Syn	Coding region
mtbs0931123_C	931123	171	T	C	959	Rv0835	lpqQ	TAT/TAC	57	Y/Y	Syn	Coding region
mtbs0932280_C	932280	653	T	C	1087	Rv0836c		TAG/TGG	218	Stop/W	Nonsyn	Coding region
mtbs0934230_G	934230	934230	C	G	931
mtbs0934611_T	934611	934611	G	T	991
mtbs0940602_G	940602	505	C	G	804	Rv0844c	narL	GGT/CGT	169	G/R	Nonsyn	Coding region
mtbs0941722_G	941722	533	T	G	699	Rv0845		ATT/AGT	178	I/S	Nonsyn	Coding region
mtbs0941845_A	941845	656	C	A	1063	Rv0845		GCG/GAG	219	A/E	Nonsyn	Coding region
mtbs0945214_A	945214	277	G	A	1846	Rv0848	cysK2	GGT/AGT	93	G/S	Nonsyn	Coding region
mtbs0949535_C	949535	1584	T	C	1995	Rv0853c	pdc	GCA/GCG	528	A/A	Syn	Coding region
mtbs0951702_T	951702	71	C	T	755	Rv0855	far	GCC/GTC	24	A/V	Nonsyn	Coding region
mtbs0954101_T	954101	820	C	T	769	Rv0858c	dapC	GCC/ACC	274	A/T	Nonsyn	Coding region
mtbs0954468_G	954468	453	C	G	831	Rv0858c	dapC	GCG/GCC	151	A/A	Syn	Coding region
mtbs0955524_G	955524	448	A	G	2040	Rv0859	fadA	AGC/GGC	150	S/G	Nonsyn	Coding region
mtbs0957117_C	957117	825	T	C	1467	Rv0860	fadB	GAT/GAC	275	D/D	Syn	Coding region
mtbs0960367_G	960367	2246	A	G	1062	Rv0862c		TTG/TCG	749	L/S	Nonsyn	Coding region
mtbs0969762_G	969762	483	C	G	1033	Rv0872c	PE_PGRS15	GGG/GGC	161	G/G	Syn	Coding region
mtbs0972980_T	972980	727	C	T	857	Rv0874c		GGC/AGC	243	G/S	Nonsyn	Coding region
mtbs0979704_C	979704	343	G	C	2185	Rv0881		GGC/CGC	115	G/R	Nonsyn	Coding region
mtbs0986463_C	986463	986463	G	C	1826
mtbs0990001_C	990001	2596	G	C	1933	Rv0890c		CCC/GCC	866	P/A	Nonsyn	Coding region
mtbs0991896_C	991896	701	T	C	744	Rv0890c		GAG/GGG	234	E/G	Nonsyn	Coding region
mtbs0993346_C	993346	110	A	C	1798	Rv0891c		GTT/GGT	37	V/G	Nonsyn	Coding region
mtbs0996205_C	996205	91	T	C	805	Rv0893c		AAG/GAG	31	K/E	Nonsyn	Coding region
mtbs0996346_A	996346	996346	G	A	708
mtbs1011511_C	1011511	1376	A	C	816	Rv0907		TAC/TCC	459	Y/S	Nonsyn	Coding region
mtbs1022003_C	1022003	1022003	A	C	723
mtbs1024346_G	1024346	136	A	G	1145	Rv0918		AGT/GGT	46	S/G	Nonsyn	Coding region
mtbs1025106_C	1025106	423	T	C	1914	Rv0919		TTT/TTC	141	F/F	Syn	Coding region
mtbs1028217_A	1028217	533	G	A	747	Rv0922		GGC/GAC	178	G/D	Nonsyn	Coding region
mtbs1034758_T	1034758	1034758	C	T	734
mtbs1037012_C	1037012	14	T	C	2007	Rv0930	pstA1	ATG/ACG	5	M/T	Nonsyn	Coding region
mtbs1037911_T	1037911	913	C	T	2048	Rv0930	pstA1	CGA/TGA	305	R/Stop	Nonsyn	Coding region
mtbs1040251_A	1040251	798	C	A	785	Rv0932c	pstS2	CCG/CCT	266	P/P	Syn	Coding region
mtbs1047165_C	1047165	1030	T	C	1762	Rv0938	ligD	TGC/CGC	344	C/R	Nonsyn	Coding region
mtbs1054784_G	1054784	538	C	G	973	Rv0945		CGC/GGC	180	R/G	Nonsyn	Coding region
mtbs1066921_T	1066921	844	G	T	534	Rv0955		GCC/TCC	282	A/S	Nonsyn	Coding region
mtbs1068151_C	1068151	591	T	C	2185	Rv0956	purN	CAT/CAC	197	H/H	Syn	Coding region
mtbs1068432_G	1068432	228	A	G	1889	Rv0957	purH	CCA/CCG	76	P/P	Syn	Coding region
mtbs1070702_C	1070702	820	T	C	1887	Rv0958		TCC/CCC	274	S/P	Nonsyn	Coding region
mtbs1071966_G	1071966	712	A	G	838	Rv0959		AAC/GAC	238	N/D	Nonsyn	Coding region
mtbs1074558_A	1074558	557	G	A	2132	Rv0962c	lprP	CCC/CTC	186	P/L	Nonsyn	Coding region
mtbs1075279_C	1075279	1075279	T	C	1721
mtbs1076309_T	1076309	370	G	T	1986	Rv0964c		CCT/ACT	124	P/T	Nonsyn	Coding region
mtbs1076689_C	1076689	1076689	A	C	758
mtbs1076880_T	1076880	318	C	T	779	Rv0965c		GCG/GCA	106	A/A	Syn	Coding region
mtbs1077312_G	1077312	524	A	G	2028	Rv0966c		GTG/GCG	175	V/A	Nonsyn	Coding region
mtbs1077626_A	1077626	210	C	A	64	Rv0966c		GGG/GGT	70	G/G	Syn	Coding region
mtbs1079927_A	1079927	1185	C	A	2133	Rv0969	ctpV	ACC/ACA	395	T/T	Syn	Coding region
mtbs1080192_A	1080192	1450	G	A	1159	Rv0969	ctpV	GAT/AAT	484	D/N	Nonsyn	Coding region
mtbs1081681_C	1081681	630	T	C	2031	Rv0970		GTT/GTC	210	V/V	Syn	Coding region
mtbs1087193_C	1087193	153	G	C	1875	Rv0974c	accD2	AAC/AAG	51	N/K	Nonsyn	Coding region
mtbs1093406_G	1093406	951	A	G	2028	Rv0978c	PE_PGRS17	GTT/GTC	317	V/V	Syn	Coding region
mtbs1093928_A	1093928	429	G	A	1418	Rv0978c	PE_PGRS17	AAC/AAT	143	N/N	Syn	Coding region
mtbs1093951_G	1093951	406	A	G	6	Rv0978c	PE_PGRS17	TGG/CGG	136	W/R	Nonsyn	Coding region
mtbs1093954_G	1093954	403	C	G	5	Rv0978c	PE_PGRS17	GGG/CGG	135	G/R	Nonsyn	Coding region
mtbs1093970_C	1093970	387	T	C	44	Rv0978c	PE_PGRS17	CAA/CAG	129	Q/Q	Syn	Coding region
mtbs1093982_G	1093981	375	C	G	1	Rv0978c	PE_PGRS17	GGG/CGG	126	G/R	Nonsyn	Coding region
mtbs1093983_G	1093983	374	T	G	15	Rv0978c	PE_PGRS17	GAC/GCC	125	D/A	Nonsyn	Coding region
mtbs1093987_C	1093987	370	T	C	8	Rv0978c	PE_PGRS17	ATC/GTC	124	I/V	Nonsyn	Coding region
mtbs1093993_G	1093993	364	T	G	22	Rv0978c	PE_PGRS17	AAC/CAC	122	N/H	Nonsyn	Coding region
mtbs1093994_G	1093994	363	C	G	25	Rv0978c	PE_PGRS17	GCG/GCC	121	A/A	Syn	Coding region
mtbs1094003_A	1094003	354	G	A	29	Rv0978c	PE_PGRS17	GGC/GGT	118	G/G	Syn	Coding region
mtbs1094021_C	1094021	336	G	C	21	Rv0978c	PE_PGRS17	ACC/ACG	112	T/T	Syn	Coding region
mtbs1094022_A	1094022	335	G	A	20	Rv0978c	PE_PGRS17	ACC/ATC	112	T/I	Nonsyn	Coding region
mtbs1094023_C	1094023	334	T	C	22	Rv0978c	PE_PGRS17	ACC/GCC	112	T/A	Nonsyn	Coding region
mtbs1094029_C	1094029	328	A	C	25	Rv0978c	PE_PGRS17	TCG/GCG	110	S/A	Nonsyn	Coding region
mtbs1094032_C	1094032	325	G	C	23	Rv0978c	PE_PGRS17	CAG/GAG	109	Q/E	Nonsyn	Coding region
mtbs1094063_G	1094062	294	T	G	1	Rv0978c	PE_PGRS17	AAC/CAC	99	N/H	Nonsyn	Coding region
mtbs1095644_T	1095644	808	C	T	1126	Rv0980c	PE_PGRS18	GCG/ACG	270	A/T	Nonsyn	Coding region
mtbs1095678_G	1095678	774	A	G	1004	Rv0980c	PE_PGRS18	GGT/GGC	258	G/G	Syn	Coding region
mtbs1096235_G	1096235	217	C	G	173	Rv0980c	PE_PGRS18	GAA/CAA	73	E/Q	Nonsyn	Coding region
mtbs1096239_A	1096239	213	G	A	155	Rv0980c	PE_PGRS18	TAC/TAT	71	Y/Y	Syn	Coding region
mtbs1096299_G	1096299	153	C	G	1070	Rv0980c	PE_PGRS18	GCG/GCC	51	A/A	Syn	Coding region
mtbs1096398_T	1096398	54	C	T	1542	Rv0980c	PE_PGRS18	GCG/GCA	18	A/A	Syn	Coding region
mtbs1096508_G	1096508	1096508	C	G	1383
mtbs1096510_C	1096510	1096510	T	C	1391
mtbs1096567_G	1096567	1096567	A	G	993
mtbs1096633_G	1096633	1096633	T	G	1794
mtbs1097220_T	1097220	399	C	T	904	Rv0981	mprA	TCC/TCT	133	S/S	Syn	Coding region
mtbs1097442_T	1097442	621	C	T	770	Rv0981	mprA	GAC/GAT	207	D/D	Syn	Coding region
mtbs1098523_A	1098523	1016	T	A	998	Rv0982	mprB	CTT/CAT	339	L/H	Nonsyn	Coding region
mtbs1099058_A	1099058	1099058	G	A	813
mtbs1100234_C	1100234	1169	T	C	1937	Rv0983	pepD	CTG/CCG	390	L/P	Nonsyn	Coding region
mtbs1102117_A	1102117	315	G	A	743	Rv0986		GTG/GTA	105	V/V	Syn	Coding region
mtbs1102468_A	1102468	666	C	A	781	Rv0986		GGC/GGA	222	G/G	Syn	Coding region
mtbs1102646_A	1102646	105	G	A	756	Rv0987		GCG/GCA	35	A/A	Syn	Coding region
mtbs1103656_T	1103656	1115	C	T	734	Rv0987		GCC/GTC	372	A/V	Nonsyn	Coding region
mtbs1104690_G	1104690	2149	T	G	932	Rv0987		TTC/GTC	717	F/V	Nonsyn	Coding region
mtbs1105686_G	1105686	571	C	G	714	Rv0988		CTG/GTG	191	L/V	Nonsyn	Coding region
mtbs1105687_C	1105687	572	T	C	715	Rv0988		CTG/CCG	191	L/P	Nonsyn	Coding region
mtbs1106422_C	1106422	961	T	C	1708	Rv0989c	grcC2	ATA/GTA	321	I/V	Nonsyn	Coding region
mtbs1107940_C	1107940	160	A	C	1038	Rv0990c		TCC/GCC	54	S/A	Nonsyn	Coding region
mtbs1108521_A	1108521	1108521	G	A	709
mtbs1109975_G	1109975	704	A	G	1920	Rv0993	galU	CAG/CGG	235	Q/R	Nonsyn	Coding region
mtbs1111678_A	1111678	67	G	A	801	Rv0995	rimJ	GGC/AGC	23	G/S	Nonsyn	Coding region
mtbs1126889_C	1126889	115	G	C	2001	Rv1007c	metS	CGC/GGC	39	R/G	Nonsyn	Coding region
mtbs1127493_C	1127493	405	T	C	773	Rv1008	tatD	AAT/AAC	135	N/N	Syn	Coding region
mtbs1127648_A	1127648	560	C	A	2003	Rv1008	tatD	ACC/AAC	187	T/N	Nonsyn	Coding region
mtbs1129832_T	1129832	681	C	T	9	Rv1010	ksgA	GAC/GAT	227	D/D	Syn	Coding region
mtbs1144585_G	1144585	22	A	G	993	Rv1023	eno	AGG/GGG	8	R/G	Nonsyn	Coding region
mtbs1145736_A	1145736	1173	T	A	63	Rv1023	eno	GCT/GCA	391	A/A	Syn	Coding region
mtbs1145848_C	1145848	1285	A	C	797	Rv1023	eno	AAA/CAA	429	K/Q	Nonsyn	Coding region
mtbs1148259_G	1148259	1148259	A	G	966
mtbs1148930_T	1148930	178	C	T	760	Rv1027c	kdpE	GGT/AGT	60	G/S	Nonsyn	Coding region
mtbs1149551_T	1149551	2136	C	T	1819	Rv1028c	kdpD	GAG/GAA	712	E/E	Syn	Coding region
mtbs1150585_A	1150585	1102	G	A	2193	Rv1028c	kdpD	CCC/TCC	368	P/S	Nonsyn	Coding region
mtbs1151054_G	1151054	633	C	G	865	Rv1028c	kdpD	TCG/TCC	211	S/S	Syn	Coding region
mtbs1151304_A	1151304	383	C	A	690	Rv1028c	kdpD	CGC/CTC	128	R/L	Nonsyn	Coding region
mtbs1159808_T	1159808	254	C	T	63	Rv1035c		CGG/CAG	85	R/Q	Nonsyn	Coding region
mtbs1160770_A	1160770	59	T	A	917	Rv1037c	esxI	CAG/CTG	20	Q/L	Nonsyn	Coding region
mtbs1161026_A	1161026	126	G	A	148	Rv1038c	esxJ	GGC/GGT	42	G/G	Syn	Coding region
mtbs1163134_C	1163134	243	T	C	1908	Rv1040c	PE8	GGA/GGG	81	G/G	Syn	Coding region
mtbs1164336_A	1164336	1164336	G	A	1129
mtbs1165114_T	1165114	322	C	T	245	Rv1041c		GAT/AAT	108	D/N	Nonsyn	Coding region
mtbs1166123_G	1166123	684	A	G	9	Rv1043c		GAT/GAC	228	D/D	Syn	Coding region
mtbs1168776_G	1168776	453	T	G	792	Rv1046c		AGA/AGC	151	R/S	Nonsyn	Coding region
mtbs1172085_A	1172085	69	C	A	735	Rv1048c		GAG/GAT	23	E/D	Nonsyn	Coding region
mtbs1173750_T	1173750	870	G	T	926	Rv1050		GCG/GCT	290	A/A	Syn	Coding region
mtbs1175343_T	1175343	1175343	C	T	768
mtbs1177157_A	1177157	230	G	A	715	Rv1054		GGC/GAC	77	G/D	Nonsyn	Coding region
mtbs1178116_C	1178116	489	T	C	1771	Rv1056		ACT/ACC	163	T/T	Syn	Coding region
mtbs1190093_C	1190093	332	A	C	1835	Rv1067c	PE_PGRS19	TTG/TGG	111	L/W	Nonsyn	Coding region
mtbs1191741_A	1191741	408	G	A	1258	Rv1068c	PE_PGRS20	TAC/TAT	136	Y/Y	Syn	Coding region
mtbs1197157_G	1197157	1197157	T	G	738
mtbs1200418_G	1200418	1200418	A	G	1695
mtbs1201581_C	1201581	815	A	C	818	Rv1076	lipU	CAG/CCG	272	Q/P	Nonsyn	Coding region
mtbs1208181_A	1208181	546	G	A	66	Rv1084		CTG/CTA	182	L/L	Syn	Coding region
mtbs1211369_C	1211369	775	A	C	1011	Rv1086		AGC/CGC	259	S/R	Nonsyn	Coding region
mtbs1212432_A	1212432	873	C	A	836	Rv1087	PE_PGRS21	GGC/GGA	291	G/G	Syn	Coding region
mtbs1215742_A	1215742	144	G	A	749	Rv1090	celA2b	CAG/CAA	48	Q/Q	Syn	Coding region
mtbs1215743_A	1215743	145	C	A	748	Rv1090	celA2b	CAG/AAG	49	Q/K	Nonsyn	Coding region
mtbs1217065_A	1217065	597	C	A	852	Rv1091	PE_PGRS22	GCC/GCA	199	A/A	Syn	Coding region
mtbs1217157_C	1217157	689	A	C	868	Rv1091	PE_PGRS22	GAC/GCC	230	D/A	Nonsyn	Coding region
mtbs1218658_C	1218658	2190	G	C	867	Rv1091	PE_PGRS22	GGG/GGC	730	G/G	Syn	Coding region
mtbs1218896_A	1218896	2428	G	A	844	Rv1091	PE_PGRS22	GGC/AGC	810	G/S	Nonsyn	Coding region
mtbs1220680_C	1220680	107	T	C	1955	Rv1093	glyA1	GTA/GCA	36	V/A	Nonsyn	Coding region
mtbs1224367_C	1224367	1224367	T	C	2137
mtbs1227830_T	1227830	855	G	T	870	Rv1099c	glpX	ACC/ACA	285	T/T	Syn	Coding region
mtbs1230778_A	1230778	194	G	A	943	Rv1102c	mazF3	ACC/ATC	65	T/I	Nonsyn	Coding region
mtbs1248382_G	1248382	301	A	G	1056	Rv1125		AGC/GGC	101	S/G	Nonsyn	Coding region
mtbs1248936_C	1248936	855	G	C	1107	Rv1125		CCG/CCC	285	P/P	Syn	Coding region
mtbs1248978_C	1248978	897	T	C	2037	Rv1125		GCT/GCC	299	A/A	Syn	Coding region
mtbs1250340_G	1250340	1065	A	G	1022	Rv1127c	ppdK	GCT/GCC	355	A/A	Syn	Coding region
mtbs1251199_T	1251199	206	C	T	1235	Rv1127c	ppdK	GGA/GAA	69	G/E	Nonsyn	Coding region
mtbs1252164_C	1252164	544	T	C	1229			TCG/CCG	182	S/P	Nonsyn	Repeat region
mtbs1254562_G	1254562	8	A	G	930	Rv1130	prpD	GAT/GGT	3	D/G	Nonsyn	Coding region
mtbs1265070_T	1265070	1265070	G	T	732
mtbs1275957_C	1275957	1275957	T	C	1217
mtbs1276588_G	1276588	293	C	G	970			TCG/TGG	98	S/W	Nonsyn	Repeat region
mtbs1276842_A	1276842	547	G	A	732			GGC/AGC	183	G/S	Nonsyn	Repeat region
mtbs1276843_C	1276843	548	G	C	724			GGC/GCC	183	G/A	Nonsyn	Repeat region
mtbs1276846_G	1276846	551	C	G	727			CCC/CGC	184	P/R	Nonsyn	Repeat region
mtbs1276853_C	1276853	558	G	C	716			GCG/GCC	186	A/A	Syn	Repeat region
mtbs1276863_C	1276863	568	A	C	53			ACG/CCG	190	T/P	Nonsyn	Repeat region
mtbs1276873_G	1276873	578	A	G	363			GAT/GGT	193	D/G	Nonsyn	Repeat region
mtbs1276875_G	1276875	580	T	G	353			TGC/GGC	194	C/G	Nonsyn	Repeat region
mtbs1276876_T	1276876	581	G	T	360			TGC/TTC	194	C/F	Nonsyn	Repeat region
mtbs1276882_G	1276882	587	C	G	597			GCG/GGG	196	A/G	Nonsyn	Repeat region
mtbs1276885_T	1276885	590	C	T	611			CCT/CTT	197	P/L	Nonsyn	Repeat region
mtbs1278278_A	1278278	10	G	A	288	Rv1150		GAT/AAT	4	D/N	Nonsyn	Miscellaneous feature
mtbs1281118_C	1281118	367	T	C	1925	Rv1154c		ACG/GCG	123	T/A	Nonsyn	Coding region
mtbs1281771_C	1281771	343	T	C	1022	Rv1155		TCG/CCG	115	S/P	Nonsyn	Coding region
mtbs1285001_C	1285001	10	A	C	821	Rv1159	pimE	ACC/CCC	4	T/P	Nonsyn	Coding region
mtbs1286766_C	1286766	172	G	C	761	Rv1160	mutT2	GGA/CGA	58	G/R	Nonsyn	Coding region
mtbs1288698_A	1288698	1371	G	A	769	Rv1161	narG	GGG/GGA	457	G/G	Syn	Coding region
mtbs1292102_G	1292102	1038	A	G	2088	Rv1162	narH	CCA/CCG	346	P/P	Syn	Coding region
mtbs1293333_G	1293333	536	C	G	797	Rv1163	narJ	CCG/CGG	179	P/R	Nonsyn	Coding region
mtbs1296834_C	1296834	683	A	C	65	Rv1166	lpqW	GAA/GCA	228	E/A	Nonsyn	Coding region
mtbs1299305_A	1299305	500	G	A	875	Rv1168c	PPE17	CCG/CTG	167	P/L	Nonsyn	Coding region
mtbs1306259_G	1306259	1968	A	G	1380	Rv1175c	fadH	GCT/GCC	656	A/A	Syn	Coding region
mtbs1307598_G	1307598	629	C	G	1892	Rv1175c	fadH	TGC/TCC	210	C/S	Nonsyn	Coding region
mtbs1313338_C	1313338	1313338	A	C	228
mtbs1315191_C	1315191	1467	A	C	2090	Rv1180	pks3	TAA/TAC	489	Stop/Y	Nonsyn	Coding region
mtbs1315884_A	1315884	651	G	A	2123	Rv1181	pks4	GCG/GCA	217	A/A	Syn	Coding region
mtbs1317655_T	1317655	2422	C	T	782	Rv1181	pks4	CTG/TTG	808	L/L	Syn	Coding region
mtbs1322741_G	1322741	1222	A	G	758	Rv1183	mmpL10	ACT/GCT	408	T/A	Nonsyn	Coding region
mtbs1327367_T	1327367	146	C	T	9	Rv1185c	fadD21	CGC/CAC	49	R/H	Nonsyn	Coding region
mtbs1327890_A	1327890	1416	G	A	1929	Rv1186c		GAC/GAT	472	D/D	Syn	Coding region
mtbs1328687_C	1328687	619	G	C	2128	Rv1186c		CCC/GCC	207	P/A	Nonsyn	Coding region
mtbs1329234_A	1329234	72	G	A	902	Rv1186c		GAC/GAT	24	D/D	Syn	Coding region
mtbs1332806_G	1332806	715	C	G	9	Rv1189	sigI	CAG/GAG	239	Q/E	Nonsyn	Coding region
mtbs1333669_G	1333669	690	T	G	731	Rv1190		GGT/GGG	230	G/G	Syn	Coding region
mtbs1336164_T	1336164	371	C	T	773	Rv1193	fadD36	CCG/CTG	124	P/L	Nonsyn	Coding region
mtbs1340208_A	1340208	860	G	A	914	Rv1196	PPE18	CGG/CAG	287	R/Q	Nonsyn	Coding region
mtbs1342581_C	1342581	25	T	C	1033	Rv1199c		ACC/GCC	9	T/A	Nonsyn	Coding region
mtbs1349733_C	1349733	402	G	C	780	Rv1206	fadD6	GAG/GAC	134	E/D	Nonsyn	Coding region
mtbs1351172_G	1351172	1351172	A	G	988
mtbs1357308_G	1357308	318	T	G	888	Rv1214c	PE14	GCA/GCC	106	A/A	Syn	Coding region
mtbs1360209_C	1360209	1593	T	C	1988	Rv1217c		GCA/GCG	531	A/A	Syn	Coding region
mtbs1361190_A	1361190	612	G	A	973	Rv1217c		AGC/AGT	204	S/S	Syn	Coding region
mtbs1361285_T	1361285	517	C	T	812	Rv1217c		GCT/ACT	173	A/T	Nonsyn	Coding region
mtbs1362006_C	1362006	728	T	C	1203	Rv1218c		CAA/CGA	243	Q/R	Nonsyn	Coding region
mtbs1367484_G	1367484	22	T	G	961	Rv1224	tatB	TGG/GGG	8	W/G	Nonsyn	Coding region
mtbs1370852_G	1370852	1370852	T	G	733
mtbs1371567_T	1371567	1371567	G	T	9
mtbs1374065_C	1374065	133	T	C	2249	Rv1230c		AGC/GGC	45	S/G	Nonsyn	Coding region
mtbs1374201_G	1374201	1374201	A	G	735
mtbs1375044_G	1375044	1125	C	G	864	Rv1232c		GCG/GCC	375	A/A	Syn	Coding region
mtbs1375724_C	1375724	445	A	C	2158	Rv1232c		TGC/GGC	149	C/G	Nonsyn	Coding region
mtbs1382628_C	1382628	415	T	C	1906	Rv1239c	corA	AAA/GAA	139	K/E	Nonsyn	Coding region
mtbs1390763_T	1390763	2290	C	T	967	Rv1248c		GTG/ATG	764	V/M	Nonsyn	Coding region
mtbs1393626_G	1393626	357	A	G	2073	Rv1249c		CTT/CTC	119	L/L	Syn	Coding region
mtbs1396922_C	1396922	2319	T	C	2051	Rv1251c		ACA/ACG	773	T/T	Syn	Coding region
mtbs1411210_G	1411210	780	T	G	2151	Rv1263	amiB2	GTT/GTG	260	V/V	Syn	Coding region
mtbs1413148_T	1413148	77	C	T	2029	RVnc0013	mcr11	GGC/GAC	26	G/D	Nonsyn	Non-coding RNA
mtbs1414021_T	1414021	1820	C	T	2008	Rv1266c	pknH	CGG/CAG	607	R/Q	Nonsyn	Coding region
mtbs1431097_T	1431097	1036	G	T	76	Rv1279		GAA/TAA	346	E/Stop	Nonsyn	Coding region
mtbs1440469_G	1440469	1563	C	G	1998	Rv1286	cysN	CCC/CCG	521	P/P	Syn	Coding region
mtbs1445781_G	1445781	54	A	G	1869	Rv1291c		GCT/GCC	18	A/A	Syn	Coding region
mtbs1446733_A	1446733	355	G	A	706	Rv1292	argS	GCC/ACC	119	A/T	Nonsyn	Coding region
mtbs1457144_T	1457144	580	C	T	2021	Rv1300	hemK	CGC/TGC	194	R/C	Nonsyn	Coding region
mtbs1468208_C	1468208	1298	A	C	1696	Rv1313c		CTG/CGG	433	L/R	Nonsyn	Coding region
mtbs1468459_G	1468459	1047	A	G	152	Rv1313c		GGT/GGC	349	G/G	Syn	Coding region
mtbs1468492_A	1468492	1014	C	A	611	Rv1313c		CTG/CTT	338	L/L	Syn	Coding region
mtbs1471659_T	1471659	41	C	T	1948	RVnc0021	mcr3	TCG/TTG	14	S/L	Nonsyn	Non-coding RNA
mtbs1477596_T	1477596	36	C	T	732	Rv1316c	ogt	GGG/GGA	12	G/G	Syn	Coding region
mtbs1479085_C	1479085	34	T	C	1032	Rv1317c	alkA	ATC/GTC	12	I/V	Nonsyn	Coding region
mtbs1480972_C	1480972	1530	T	C	1209	Rv1319c		GAA/GAG	510	E/E	Syn	Coding region
mtbs1482627_C	1482627	1591	T	C	2117	Rv1320c		ACG/GCG	531	T/A	Nonsyn	Coding region
mtbs1484708_C	1484708	430	A	C	2014	Rv1321		AGC/CGC	144	S/R	Nonsyn	Coding region
mtbs1490905_G	1490905	1408	A	G	978	Rv1326c	glgB	TCT/CCT	470	S/P	Nonsyn	Coding region
mtbs1498951_T	1498951	239	G	T	879	Rv1329c	dinG	ACG/AAG	80	T/K	Nonsyn	Coding region
mtbs1499274_G	1499274	1286	C	G	2192	Rv1330c	pncB1	GGC/GCC	429	G/A	Nonsyn	Coding region
mtbs1501700_A	1501700	102	G	A	969	Rv1333		GTG/GTA	34	V/V	Syn	Coding region
mtbs1523817_T	1523817	216	C	T	707	Rv1355c	moeY	CGG/CGA	72	R/R	Syn	Coding region
mtbs1526311_T	1526311	1526311	G	T	710
mtbs1526819_A	1526819	208	C	A	1722	Rv1358		CGG/AGG	70	R/R	Syn	Coding region
mtbs1533241_C	1533241	393	G	C	1685	Rv1361c	PPE19	ACC/ACG	131	T/T	Syn	Coding region
mtbs1533583_A	1533583	51	G	A	1739	Rv1361c	PPE19	TAC/TAT	17	Y/Y	Syn	Coding region
mtbs1536251_T	1536251	1394	G	T	2058	Rv1364c		GCG/GAG	465	A/E	Nonsyn	Coding region
mtbs1540141_C	1540141	505	T	C	995	Rv1367c		ATC/GTC	169	I/V	Nonsyn	Coding region
mtbs1541798_T	1541798	779	C	T	916	Rv1368	lprF	GCG/GTG	260	A/V	Nonsyn	Coding region
mtbs1544255_T	1544255	897	C	T	986	Rv1371		CGC/CGT	299	R/R	Syn	Coding region
mtbs1546703_T	1546703	692	C	T	1134	Rv1373		CCG/CTG	231	P/L	Nonsyn	Coding region
mtbs1547125_C	1547125	406	T	C	1841	Rv1374c		ACA/GCA	136	T/A	Nonsyn	Coding region
mtbs1552547_A	1552547	109	G	A	2066	Rv1378c		CGG/TGG	37	R/W	Nonsyn	Coding region
mtbs1556787_C	1556787	817	T	C	791	Rv1383	carA	TCG/CCG	273	S/P	Nonsyn	Coding region
mtbs1561939_C	1561939	171	G	C	878	Rv1387	PPE20	GAG/GAC	57	E/D	Nonsyn	Coding region
mtbs1563717_T	1563717	24	C	T	1767	Rv1388	mihF	GTC/GTT	8	V/V	Syn	Coding region
mtbs1570566_A	1570566	404	C	A	1813	Rv1394c	cyp132	CGG/CTG	135	R/L	Nonsyn	Coding region
mtbs1573660_G	1573660	198	T	G	1926	Rv1396c	PE_PGRS25	AGA/AGC	66	R/S	Nonsyn	Coding region
mtbs1576481_G	1576481	316	T	G	792	Rv1400c	lipI	ACC/CCC	106	T/P	Nonsyn	Coding region
mtbs1576527_T	1576527	270	G	T	795	Rv1400c	lipI	TTC/TTA	90	F/L	Nonsyn	Coding region
mtbs1577241_A	1577241	312	G	A	841	Rv1401		CCG/CCA	104	P/P	Syn	Coding region
mtbs1588899_T	1588899	333	G	T	1926	Rv1412	ribC	GCG/GCT	111	A/A	Syn	Coding region
mtbs1593331_A	1593331	1593331	G	A	849
mtbs1594906_A	1594906	865	G	A	801	Rv1420	uvrC	GTC/ATC	289	V/I	Nonsyn	Coding region
mtbs1595342_C	1595342	1301	T	C	956	Rv1420	uvrC	GTG/GCG	434	V/A	Nonsyn	Coding region
mtbs1606673_T	1606673	288	G	T	815	Rv1430	PE16	GCG/GCT	96	A/A	Syn	Coding region
mtbs1608276_C	1608276	194	A	C	968	Rv1431		AAC/ACC	65	N/T	Nonsyn	Coding region
mtbs1609840_G	1609840	1758	A	G	1982	Rv1431		CCA/CCG	586	P/P	Syn	Coding region
mtbs1613035_C	1613035	1613035	T	C	1881
mtbs1616061_T	1616061	498	C	T	803	Rv1438	tpi	AGC/AGT	166	S/S	Syn	Coding region
mtbs1617302_T	1617302	85	G	T	765	Rv1439c		CTT/ATT	29	L/I	Nonsyn	Coding region
mtbs1618978_C	1618978	707	T	C	1061	Rv1441c	PE_PGRS26	GAT/GGT	236	D/G	Nonsyn	Coding region
mtbs1620181_G	1620181	391	C	G	833	Rv1442	bisC	CTC/GTC	131	L/V	Nonsyn	Coding region
mtbs1624791_G	1624791	575	C	G	2098	Rv1446c	opcA	CGA/CCA	192	R/P	Nonsyn	Coding region
mtbs1627351_C	1627351	730	T	C	1320	Rv1448c	tal	ACC/GCC	244	T/A	Nonsyn	Coding region
mtbs1630148_C	1630148	52	A	C	1796	Rv1449c	tkt	TAC/GAC	18	Y/D	Nonsyn	Coding region
mtbs1634418_T	1634418	210	C	T	727	Rv1450c	PE_PGRS27	GCG/GCA	70	A/A	Syn	Coding region
mtbs1634523_T	1634523	105	C	T	886	Rv1450c	PE_PGRS27	TCG/TCA	35	S/S	Syn	Coding region
mtbs1634541_G	1634541	87	A	G	535	Rv1450c	PE_PGRS27	AAT/AAC	29	N/N	Syn	Coding region
mtbs1634547_T	1634547	81	C	T	712	Rv1450c	PE_PGRS27	GCG/GCA	27	A/A	Syn	Coding region
mtbs1634548_A	1634548	80	G	A	709	Rv1450c	PE_PGRS27	GCG/GTG	27	A/V	Nonsyn	Coding region
mtbs1634550_A	1634550	78	G	A	722	Rv1450c	PE_PGRS27	GGC/GGT	26	G/G	Syn	Coding region
mtbs1634580_C	1634580	48	T	C	978	Rv1450c	PE_PGRS27	TTA/TTG	16	L/L	Syn	Coding region
mtbs1634581_G	1634581	47	A	G	976	Rv1450c	PE_PGRS27	TTA/TCA	16	L/S	Nonsyn	Coding region
mtbs1634586_C	1634586	42	T	C	986	Rv1450c	PE_PGRS27	GCA/GCG	14	A/A	Syn	Coding region
mtbs1634589_C	1634589	39	G	C	975	Rv1450c	PE_PGRS27	GCC/GCG	13	A/A	Syn	Coding region
mtbs1634592_G	1634592	36	C	G	978	Rv1450c	PE_PGRS27	GCG/GCC	12	A/A	Syn	Coding region
mtbs1634609_T	1634609	19	C	T	1181	Rv1450c	PE_PGRS27	GCC/ACC	7	A/T	Nonsyn	Coding region
mtbs1634610_T	1634610	18	C	T	1187	Rv1450c	PE_PGRS27	GTG/GTA	6	V/V	Syn	Coding region
mtbs1636826_A	1636826	1404	C	A	1831	Rv1452c	PE_PGRS28	GGG/GGT	468	G/G	Syn	Coding region
mtbs1638364_T	1638364	29	C	T	756			CGA/CAA	10	R/Q	Nonsyn	Repeat region
mtbs1639594_A	1639594	1214	C	A	2064	Rv1453		CCA/CAA	405	P/Q	Nonsyn	Coding region
mtbs1643864_C	1643864	397	T	C	851	Rv1458c		ACC/GCC	133	T/A	Nonsyn	Coding region
mtbs1645802_C	1645802	337	T	C	1903	Rv1459c		AAA/GAA	113	K/E	Nonsyn	Coding region
mtbs1647436_A	1647436	448	G	A	748	Rv1461		GTA/ATA	150	V/I	Nonsyn	Coding region
mtbs1650072_G	1650072	547	A	G	2086	Rv1462		AAC/GAC	183	N/D	Nonsyn	Coding region
mtbs1651308_G	1651308	593	A	G	761	Rv1463		GAA/GGA	198	E/G	Nonsyn	Coding region
mtbs1654730_G	1654730	773	T	G	530	Rv1467c	fadE15	AAG/ACG	258	K/T	Nonsyn	Coding region
mtbs1669158_C	1669158	1669158	T	C	740
mtbs1676290_A	1676290	594	C	A	1782	Rv1486c		AAG/AAT	198	K/N	Nonsyn	Coding region
mtbs1678706_C	1678706	155	A	C	803	Rv1489		AAG/ACG	52	K/T	Nonsyn	Coding region
mtbs1688064_G	1688064	124	A	G	832	Rv1497	lipL	ATG/GTG	42	M/V	Nonsyn	Coding region
mtbs1688300_C	1688300	360	T	C	1156	Rv1497	lipL	TTT/TTC	120	F/F	Syn	Coding region
mtbs1689349_T	1689349	572	C	T	1788	Rv1498c		CGC/CAC	191	R/H	Nonsyn	Coding region
mtbs1692141_C	1692141	252	A	C	1689	Rv1501		ATA/ATC	84	I/I	Syn	Coding region
mtbs1693561_G	1693561	638	A	G	1721	Rv1502		TAC/TGC	213	Y/C	Nonsyn	Coding region
mtbs1695037_A	1695037	108	G	A	750	Rv1504c		TTC/TTT	36	F/F	Syn	Coding region
mtbs1695796_T	1695796	151	C	T	750	Rv1505c		GCC/ACC	51	A/T	Nonsyn	Coding region
mtbs1697896_T	1697896	1697896	C	T	715
mtbs1698911_A	1698911	984	G	A	1917	Rv1508c		GGC/GGT	328	G/G	Syn	Coding region
mtbs1699849_A	1699849	46	G	A	960	Rv1508c		CCG/TCG	16	P/S	Nonsyn	Coding region
mtbs1701215_T	1701215	1701215	C	T	737
mtbs1706119_C	1706119	477	T	C	1927	Rv1514c		TCA/TCG	159	S/S	Syn	Coding region
mtbs1706685_A	1706685	842	C	A	742	Rv1515c		GGA/GTA	281	G/V	Nonsyn	Coding region
mtbs1709432_T	1709432	562	C	T	1216	Rv1517		CTC/TTC	188	L/F	Nonsyn	Coding region
mtbs1711670_T	1711670	643	C	T	751	Rv1520		CGC/TGC	215	R/C	Nonsyn	Coding region
mtbs1713192_G	1713192	891	A	G	1322	Rv1521	fadD25	GTA/GTG	297	V/V	Syn	Coding region
mtbs1716472_G	1716472	1141	A	G	1046	Rv1522c	mmpL12	TCC/CCC	381	S/P	Nonsyn	Coding region
mtbs1722200_G	1722200	6210	C	G	801	Rv1527c	pks5	GTG/GTC	2070	V/V	Syn	Coding region
mtbs1722228_C	1722228	6182	A	C	680	Rv1527c	pks5	CTG/CGG	2061	L/R	Nonsyn	Coding region
mtbs1727575_T	1727575	835	C	T	9	Rv1527c	pks5	GCC/ACC	279	A/T	Nonsyn	Coding region
mtbs1728837_G	1728837	1728837	A	G	1819
mtbs1733134_T	1733134	417	C	T	747	Rv1532c		CAG/CAA	139	Q/Q	Syn	Coding region
mtbs1733325_G	1733325	226	C	G	796	Rv1532c		GCT/CCT	76	A/P	Nonsyn	Coding region
mtbs1741352_T	1741352	841	C	T	835	Rv1538c	ansA	GGC/AGC	281	G/S	Nonsyn	Coding region
mtbs1752561_C	1752561	773	T	C	1850	Rv1548c	PPE21	GAC/GGC	258	D/G	Nonsyn	Coding region
mtbs1759252_T	1759252	1572	G	T	1860	Rv1552	frdA	TCG/TCT	524	S/S	Syn	Coding region
mtbs1760292_G	1760292	118	A	G	1910	Rv1554	frdC	ATG/GTG	40	M/V	Nonsyn	Coding region
mtbs1774659_T	1774659	1774659	C	T	723
mtbs1778430_C	1778430	572	T	C	2287	Rv1570	bioD	ATG/ACG	191	M/T	Nonsyn	Coding region
mtbs1789446_T	1789446	366	C	T	255			ACG/ACA	122	T/T	Syn	Repeat region
mtbs1789564_T	1789564	248	C	T	1222			GGC/GAC	83	G/D	Nonsyn	Repeat region
mtbs1789565_A	1789565	247	C	A	1233			GGC/TGC	83	G/C	Nonsyn	Repeat region
mtbs1789650_T	1789650	162	C	T	1304			ACG/ACA	54	T/T	Syn	Repeat region
mtbs1789654_G	1789654	158	A	G	1309			TTG/TCG	53	L/S	Nonsyn	Repeat region
mtbs1792777_C	1792777	964	T	C	1222	Rv1592c		ATT/GTT	322	I/V	Nonsyn	Coding region
mtbs1792778_C	1792778	963	T	C	1222	Rv1592c		GAA/GAG	321	E/E	Syn	Coding region
mtbs1798355_A	1798355	62	G	A	1930	Rv1597		GGT/GAT	21	G/D	Nonsyn	Coding region
mtbs1803265_A	1803265	602	G	A	1972	Rv1602	hisH	AGC/AAC	201	S/N	Nonsyn	Coding region
mtbs1804409_A	1804409	371	C	A	1955	Rv1604	impA	CCA/CAA	124	P/Q	Nonsyn	Coding region
mtbs1811375_T	1811375	249	G	T	856	Rv1612	trpB	GGG/GGT	83	G/G	Syn	Coding region
mtbs1817976_T	1817976	362	A	T	2169	Rv1618	tesB1	CAC/CTC	121	H/L	Nonsyn	Coding region
mtbs1831220_C	1831220	556	A	C	778	Rv1629	polA	ACC/CCC	186	T/P	Nonsyn	Coding region
mtbs1831226_G	1831226	562	A	G	786	Rv1629	polA	AGG/GGG	188	R/G	Nonsyn	Coding region
mtbs1831288_T	1831288	624	C	T	787	Rv1629	polA	CCC/CCT	208	P/P	Syn	Coding region
mtbs1834177_C	1834177	636	A	C	737	Rv1630	rpsA	CGA/CGC	212	R/R	Syn	Coding region
mtbs1836286_C	1836286	1836286	G	C	2051
mtbs1839759_C	1839759	592	G	C	1054	Rv1634		GGG/CGG	198	G/R	Nonsyn	Coding region
mtbs1847919_G	1847919	540	C	G	1890	Rv1639c		ACG/ACC	180	T/T	Syn	Coding region
mtbs1849051_T	1849051	2985	C	T	766	Rv1640c	lysX	CCG/CCA	995	P/P	Syn	Coding region
mtbs1849609_C	1849609	2427	T	C	1059	Rv1640c	lysX	CGA/CGG	809	R/R	Syn	Coding region
mtbs1849934_G	1849934	2102	A	G	761	Rv1640c	lysX	ATT/ACT	701	I/T	Nonsyn	Coding region
mtbs1852804_T	1852804	532	C	T	9	Rv1641	infC	CGC/TGC	178	R/C	Nonsyn	Coding region
mtbs1854300_C	1854300	695	T	C	2012	Rv1644	tsnR	CTG/CCG	232	L/P	Nonsyn	Coding region
mtbs1856777_C	1856777	4	G	C	2073	Rv1647		GCG/CCG	2	A/P	Nonsyn	Coding region
mtbs1859559_A	1859559	827	C	A	1015	Rv1649	pheS	GCC/GAC	276	A/D	Nonsyn	Coding region
mtbs1877744_C	1877744	2441	A	C	837	Rv1661	pks7	GAA/GCA	814	E/A	Nonsyn	Coding region
mtbs1884305_G	1884305	2602	T	G	64	Rv1662	pks8	TTC/GTC	868	F/V	Nonsyn	Coding region
mtbs1885385_G	1885385	3682	T	G	752	Rv1662	pks8	TTG/GTG	1228	L/V	Nonsyn	Coding region
mtbs1885772_A	1885772	4069	G	A	2021	Rv1662	pks8	GCC/ACC	1357	A/T	Nonsyn	Coding region
mtbs1888373_C	1888373	348	T	C	759	Rv1664	pks9	GCT/GCC	116	A/A	Syn	Coding region
mtbs1892017_C	1892017	792	T	C	751	Rv1665	pks11	CAT/CAC	264	H/H	Syn	Coding region
mtbs1894422_G	1894422	921	A	G	1425	Rv1668c		GAT/GAC	307	D/D	Syn	Coding region
mtbs1897608_T	1897608	600	C	T	778	Rv1672c		TTG/TTA	200	L/L	Syn	Coding region
mtbs1901493_C	1901493	447	T	C	1997	Rv1676		AGT/AGC	149	S/S	Syn	Coding region
mtbs1902337_C	1902337	1902337	A	C	725
mtbs1906078_G	1906078	829	A	G	837	Rv1681	moeX	ACC/GCC	277	T/A	Nonsyn	Coding region
mtbs1907296_C	1907296	894	G	C	1901	Rv1682		GCG/GCC	298	A/A	Syn	Coding region
mtbs1916137_G	1916137	189	A	G	1382	Rv1691		CTA/CTG	63	L/L	Syn	Coding region
mtbs1917972_G	1917972	33	A	G	2102	Rv1694	tlyA	CTA/CTG	11	L/L	Syn	Coding region
mtbs1924008_A	1924008	180	G	A	746	Rv1699	pyrG	CCG/CCA	60	P/P	Syn	Coding region
mtbs1931718_C	1931718	937	G	C	1132	Rv1705c	PPE22	CTG/GTG	313	L/V	Nonsyn	Coding region
mtbs1933988_A	1933988	1933988	G	A	1819
mtbs1944107_G	1944107	532	A	G	1891	Rv1716		AGT/GGT	178	S/G	Nonsyn	Coding region
mtbs1944402_C	1944402	827	T	C	2053	Rv1716		GTC/GCC	276	V/A	Nonsyn	Coding region
mtbs1950767_C	1950767	285	T	C	1834	Rv1724c		AAA/AAG	95	K/K	Syn	Coding region
mtbs1955941_C	1955941	1305	G	C	866	Rv1730c		GAC/GAG	435	D/E	Nonsyn	Coding region
mtbs1960284_A	1960284	204	C	A	1919	Rv1733c		CAG/CAT	68	Q/H	Nonsyn	Coding region
mtbs1961735_G	1961735	54	A	G	781	Rv1735c		GCT/GCC	18	A/A	Syn	Coding region
mtbs1967026_T	1967026	612	C	T	747	Rv1739c		GCG/GCA	204	A/A	Syn	Coding region
mtbs1967237_A	1967237	401	C	A	1918	Rv1739c		CGA/CTA	134	R/L	Nonsyn	Coding region
mtbs1967543_A	1967543	95	C	A	818	Rv1739c		GGC/GTC	32	G/V	Nonsyn	Coding region
mtbs1971725_C	1971725	267	G	C	1112	Rv1745c	idi	CGC/CGG	89	R/R	Syn	Coding region
mtbs1980652_T	1980652	1032	G	T	830	Rv1751		CCG/CCT	344	P/P	Syn	Coding region
mtbs1982064_C	1982064	2712	G	C	64	Rv1753c	PPE24	CCC/CCG	904	P/P	Syn	Coding region
mtbs1982067_C	1982067	2709	G	C	63	Rv1753c	PPE24	CTC/CTG	903	L/L	Syn	Coding region
mtbs2003105_T	2003105	480	C	T	811	Rv1769		TTC/TTT	160	F/F	Syn	Coding region
mtbs2003827_C	2003827	1202	A	C	886	Rv1769		GAC/GCC	401	D/A	Nonsyn	Coding region
mtbs2009681_T	2009681	510	C	T	9	Rv1775		AGC/AGT	170	S/S	Syn	Coding region
mtbs2009848_G	2009848	677	C	G	535	Rv1775		TCC/TGC	226	S/C	Nonsyn	Coding region
mtbs2010614_A	2010614	2010614	G	A	930
mtbs2022868_C	2022868	3612	T	C	2121	Rv1783	eccC5	AGT/AGC	1204	S/S	Syn	Coding region
mtbs2023628_G	2023628	1001	C	G	848	Rv1785c	cyp143	GGA/GCA	334	G/A	Nonsyn	Coding region
mtbs2030355_G	2030355	9	A	G	135	Rv1792	esxM	TCA/TCG	3	S/S	Syn	Miscellaneous feature
mtbs2044456_G	2044456	1073	T	G	550	Rv1802	PPE30	CTG/CGG	358	L/R	Nonsyn	Coding region
mtbs2045310_G	2045310	1533	A	G	2105	Rv1803c	PE_PGRS32	ATT/ATC	511	I/I	Syn	Coding region
mtbs2048226_T	2048226	155	C	T	65	Rv1806	PE20	GCA/GTA	52	A/V	Nonsyn	Coding region
mtbs2049065_C	2049065	668	T	C	1895	Rv1807	PPE31	TTC/TCC	223	F/S	Nonsyn	Coding region
mtbs2049097_C	2049097	700	G	C	1719	Rv1807	PPE31	GTC/CTC	234	V/L	Nonsyn	Coding region
mtbs2050822_C	2050822	902	G	C	1055	Rv1808	PPE32	GGA/GCA	301	G/A	Nonsyn	Coding region
mtbs2051746_C	2051746	465	T	C	2001	Rv1809	PPE33	GCT/GCC	155	A/A	Syn	Coding region
mtbs2052035_T	2052035	754	G	T	1766	Rv1809	PPE33	GTG/TTG	252	V/L	Nonsyn	Coding region
mtbs2055271_G	2055271	89	A	G	2091	Rv1812c		CTA/CCA	30	L/P	Nonsyn	Coding region
mtbs2056896_T	2056896	376	C	T	9	Rv1814	erg3	CAC/TAC	126	H/Y	Nonsyn	Coding region
mtbs2057774_T	2057774	247	A	T	2038	Rv1815		ATC/TTC	83	I/F	Nonsyn	Coding region
mtbs2062006_A	2062006	669	C	A	60	Rv1818c	PE_PGRS33	GGG/GGT	223	G/G	Syn	Coding region
mtbs2067684_A	2067684	1228	G	A	759	Rv1821	secA2	GTG/ATG	410	V/M	Nonsyn	Coding region
mtbs2069771_A	2069771	70	C	A	773	Rv1823		CAG/AAG	24	Q/K	Nonsyn	Coding region
mtbs2072313_A	2072313	362	C	A	748	Rv1826	gcvH	ACA/AAA	121	T/K	Nonsyn	Coding region
mtbs2074754_T	2074754	2074754	C	T	1235
mtbs2078246_G	2078246	2370	C	G	751	Rv1832	gcvB	GGC/GGG	790	G/G	Syn	Coding region
mtbs2082053_G	2082053	535	A	G	752	Rv1835c		TGC/CGC	179	C/R	Nonsyn	Coding region
mtbs2086672_T	2086672	310	C	T	772	Rv1837c	glcB	GGT/AGT	104	G/S	Nonsyn	Coding region
mtbs2096186_G	2096186	414	A	G	2190	Rv1846c	blaI	ACT/ACC	138	T/T	Syn	Coding region
mtbs2097270_T	2097270	394	C	T	829	Rv1847		CGG/TGG	132	R/W	Nonsyn	Coding region
mtbs2107264_T	2107264	691	C	T	64	Rv1859	modC	CGC/TGC	231	R/C	Nonsyn	Coding region
mtbs2108141_C	2108141	406	T	C	2094	Rv1860	apa	TTC/CTC	136	F/L	Nonsyn	Coding region
mtbs2108890_C	2108890	2108890	A	C	1037
mtbs2112832_C	2112832	135	A	C	765	Rv1865c		GCT/GCG	45	A/A	Syn	Coding region
mtbs2116903_T	2116903	1140	C	T	2115	Rv1867		GGC/GGT	380	G/G	Syn	Coding region
mtbs2122395_T	2122395	757	C	T	874	Rv1872c	lldD2	GTG/ATG	253	V/M	Nonsyn	Coding region
mtbs2122976_G	2122976	176	C	G	1015	Rv1872c	lldD2	GGT/GCT	59	G/A	Nonsyn	Coding region
mtbs2123169_G	2123169	2123169	T	G	1850
mtbs2128870_G	2128870	849	A	G	2022	Rv1878	glnA3	CTA/CTG	283	L/L	Syn	Coding region
mtbs2135154_T	2135154	714	G	T	780	Rv1886c	fbpB	CCC/CCA	238	P/P	Syn	Coding region
mtbs2135870_C	2135870	2135870	T	C	1724
mtbs2138436_G	2138436	2138436	A	G	725
mtbs2138453_T	2138453	165	C	T	860	Rv1888A		GGG/GGA	55	G/G	Syn	Coding region
mtbs2142266_A	2142266	2142266	C	A	739
mtbs2143328_C	2143328	808	G	C	1833	Rv1895		GTG/CTG	270	V/L	Nonsyn	Coding region
mtbs2147022_C	2147022	612	A	C	1802	Rv1900c	lipJ	ATT/ATG	204	I/M	Nonsyn	Coding region
mtbs2149762_A	2149762	513	G	A	65	Rv1902c	nanT	TTC/TTT	171	F/F	Syn	Coding region
mtbs2151222_G	2151222	269	T	G	777	Rv1904		TTG/TGG	90	L/W	Nonsyn	Coding region
mtbs2154724_A	2154724	1388	C	A	963	Rv1908c	katG	CGG/CTG	463	R/L	Nonsyn	Coding region
mtbs2155168_G	2155168	944	C	G	688	Rv1908c	katG	AGC/ACC	315	S/T	Nonsyn	Coding region
mtbs2158109_C	2158109	983	T	C	1004	Rv1912c	fadB5	GAC/GGC	328	D/G	Nonsyn	Coding region
mtbs2160998_A	2160998	536	G	A	1444	Rv1915	aceAa	GGC/GAC	179	G/D	Nonsyn	Coding region
mtbs2163790_C	2163790	20	A	C	2142			CTG/CGG	7	L/R	Nonsyn	Repeat region
mtbs2165286_C	2165286	2026	A	C	1909	Rv1917c	PPE34	TCA/GCA	676	S/A	Nonsyn	Coding region
mtbs2167926_G	2167926	2687	A	G	957	Rv1918c	PPE35	TTG/TCG	896	L/S	Nonsyn	Coding region
mtbs2169016_C	2169016	1597	T	C	9	Rv1918c	PPE35	ACG/GCG	533	T/A	Nonsyn	Coding region
mtbs2172380_C	2172380	758	A	C	877	Rv1920		GAG/GCG	253	E/A	Nonsyn	Coding region
mtbs2173860_C	2173860	2173860	A	C	820
mtbs2177366_T	2177366	280	C	T	757	Rv1925	fadD31	CGC/TGC	94	R/C	Nonsyn	Coding region
mtbs2179825_C	2179825	153	G	C	798	Rv1927		GAG/GAC	51	E/D	Nonsyn	Coding region
mtbs2185674_G	2185674	515	A	G	777	Rv1934c	fadE17	ATC/ACC	172	I/T	Nonsyn	Coding region
mtbs2187587_C	2187587	204	G	C	885	Rv1936		CAG/CAC	68	Q/H	Nonsyn	Coding region
mtbs2191498_T	2191498	472	G	T	800	Rv1938	ephB	GGG/TGG	158	G/W	Nonsyn	Coding region
mtbs2198786_G	2198786	279	T	G	65	Rv1948c		CCA/CCC	93	P/P	Syn	Coding region
mtbs2199052_G	2199052	13	C	G	948	Rv1948c		GGT/CGT	5	G/R	Nonsyn	Coding region
mtbs2202500_T	2202500	363	C	T	815	Rv1956	higA	CAC/CAT	121	H/H	Syn	Coding region
mtbs2209465_A	2209465	139	G	A	1097	Rv1966	mce3A	GCG/ACG	47	A/T	Nonsyn	Coding region
mtbs2211826_G	2211826	201	A	G	1812	Rv1968	mce3C	AAA/AAG	67	K/K	Syn	Coding region
mtbs2216443_A	2216443	1187	C	A	2222	Rv1971	mce3F	GCG/GAG	396	A/E	Nonsyn	Coding region
mtbs2216963_G	2216963	372	C	G	768	Rv1972		CAC/CAG	124	H/Q	Nonsyn	Coding region
mtbs2220512_G	2220512	759	T	G	1955	Rv1977		TCT/TCG	253	S/S	Syn	Coding region
mtbs2221584_C	2221584	677	G	C	874	Rv1978		AGT/ACT	226	S/T	Nonsyn	Coding region
mtbs2223293_C	2223293	2223293	T	C	1959
mtbs2225365_C	2225365	2225365	T	C	713
mtbs2228967_G	2228967	2228967	A	G	1906
mtbs2229801_G	2229801	102	C	G	1027	Rv1985c		CCG/CCC	34	P/P	Syn	Coding region
mtbs2230045_A	2230045	35	G	A	725	Rv1986		TGC/TAC	12	C/Y	Nonsyn	Coding region
mtbs2235087_A	2235087	2220	G	A	785	Rv1992c	ctpG	TTC/TTT	740	F/F	Syn	Coding region
mtbs2244421_T	2244421	718	G	T	982	Rv1999c		CTG/ATG	240	L/M	Nonsyn	Coding region
mtbs2245864_A	2245864	656	C	A	769	Rv2000		CCG/CAG	219	P/Q	Nonsyn	Coding region
mtbs2247677_C	2247677	18	A	C	1231	Rv2002	fabG3	ATA/ATC	6	I/I	Syn	Coding region
mtbs2251605_A	2251605	279	G	A	821	Rv2005c		AGC/AGT	93	S/S	Syn	Coding region
mtbs2251999_G	2251999	2251999	A	G	1924
mtbs2260100_T	2260100	2260100	C	T	940
mtbs2260525_T	2260525	83	C	T	2033			GCG/GTG	28	A/V	Nonsyn	Mobile element
mtbs2262620_A	2262620	453	T	A	186	Rv2015c		GAA/GAT	151	E/D	Nonsyn	Coding region
mtbs2262679_A	2262679	394	G	A	281	Rv2015c		CTG/TTG	132	L/L	Syn	Coding region
mtbs2262698_C	2262698	375	G	C	293	Rv2015c		GGC/GGG	125	G/G	Syn	Coding region
mtbs2264782_A	2264782	785	C	A	1907	Rv2017		GCG/GAG	262	A/E	Nonsyn	Coding region
mtbs2265059_G	2265059	2265059	T	G	1722
mtbs2266487_C	2266487	234	G	C	49	Rv2020c		CTC/CTG	78	L/L	Syn	Coding region
mtbs2266508_T	2266508	213	A	T	36	Rv2020c		GAT/GAA	71	D/E	Nonsyn	Coding region
mtbs2266517_C	2266517	204	T	C	40	Rv2020c		GAA/GAG	68	E/E	Syn	Coding region
mtbs2266550_T	2266550	171	G	T	44	Rv2020c		GGC/GGA	57	G/G	Syn	Coding region
mtbs2266553_G	2266553	168	C	G	40	Rv2020c		TCG/TCC	56	S/S	Syn	Coding region
mtbs2266583_G	2266583	138	C	G	56	Rv2020c		GAG/GAC	46	E/D	Nonsyn	Coding region
mtbs2266598_C	2266598	123	G	C	44	Rv2020c		CTC/CTG	41	L/L	Syn	Coding region
mtbs2266604_G	2266604	117	C	G	42	Rv2020c		TCG/TCC	39	S/S	Syn	Coding region
mtbs2266624_T	2266624	97	G	T	47	Rv2020c		CTA/ATA	33	L/I	Nonsyn	Coding region
mtbs2267015_C	2267015	96	T	C	774	Rv2021c		GCA/GCG	32	A/A	Syn	Coding region
mtbs2268433_A	2268433	294	C	A	720	Rv2023A		CAG/CAT	98	Q/H	Nonsyn	Miscellaneous feature
mtbs2268627_C	2268627	100	G	C	758	Rv2023A		CAA/GAA	34	Q/E	Nonsyn	Miscellaneous feature
mtbs2269545_A	2269545	696	G	A	772	Rv2024c		AGC/AGT	232	S/S	Syn	Coding region
mtbs2269780_C	2269780	461	T	C	2095	Rv2024c		GAC/GGC	154	D/G	Nonsyn	Coding region
mtbs2270102_G	2270102	139	A	G	2116	Rv2024c		TGG/CGG	47	W/R	Nonsyn	Coding region
mtbs2282787_T	2282787	935	C	T	1896	Rv2037c		TGT/TAT	312	C/Y	Nonsyn	Coding region
mtbs2283191_C	2283191	531	G	C	848	Rv2037c		GCC/GCG	177	A/A	Syn	Coding region
mtbs2285251_A	2285251	391	C	A	1822	Rv2039c		GTC/TTC	131	V/F	Nonsyn	Coding region
mtbs2287121_G	2287121	726	A	G	1863	Rv2041c		GAT/GAC	242	D/D	Syn	Coding region
mtbs2288085_C	2288085	597	G	C	743	Rv2042c		GCC/GCG	199	A/A	Syn	Coding region
mtbs2289171_T	2289171	71	C	T	2	Rv2043c	pncA	GGC/GAC	24	G/D	Nonsyn	Coding region
mtbs2294007_C	2294007	520	T	C	786	Rv2047c		ACG/GCG	174	T/A	Nonsyn	Coding region
mtbs2295685_A	2295685	11302	C	A	627	Rv2048c	pks12	GTG/TTG	3768	V/L	Nonsyn	Coding region
mtbs2296042_C	2296042	10945	G	C	1879	Rv2048c	pks12	CCG/GCG	3649	P/A	Nonsyn	Coding region
mtbs2296181_G	2296181	10806	A	G	1069	Rv2048c	pks12	GGT/GGC	3602	G/G	Syn	Coding region
mtbs2298194_T	2298194	8793	G	T	867	Rv2048c	pks12	GCC/GCA	2931	A/A	Syn	Coding region
mtbs2300237_G	2300237	6750	A	G	2087	Rv2048c	pks12	GCT/GCC	2250	A/A	Syn	Coding region
mtbs2300546_T	2300546	6441	A	T	1837	Rv2048c	pks12	CAT/CAA	2147	H/Q	Nonsyn	Coding region
mtbs2300552_G	2300552	6435	T	G	1835	Rv2048c	pks12	CCA/CCC	2145	P/P	Syn	Coding region
mtbs2300555_G	2300555	6432	A	G	1845	Rv2048c	pks12	GAT/GAC	2144	D/D	Syn	Coding region
mtbs2302033_A	2302033	4954	G	A	1323	Rv2048c	pks12	CGC/TGC	1652	R/C	Nonsyn	Coding region
mtbs2304238_G	2304238	2749	A	G	64	Rv2048c	pks12	TCC/CCC	917	S/P	Nonsyn	Coding region
mtbs2311099_G	2311099	1419	C	G	1537	Rv2052c		CCG/CCC	473	P/P	Syn	Coding region
mtbs2314689_A	2314689	137	C	A	770	Rv2057c	rpmG1	CGT/CTT	46	R/L	Nonsyn	Coding region
mtbs2315386_A	2315386	213	C	A	767	Rv2059		CAC/CAA	71	H/Q	Nonsyn	Coding region
mtbs2316123_A	2316123	950	C	A	804	Rv2059		ACA/AAA	317	T/K	Nonsyn	Coding region
mtbs2318725_T	2318725	2029	C	T	755	Rv2062c	cobN	GAA/AAA	677	E/K	Nonsyn	Coding region
mtbs2320320_T	2320320	434	C	T	817	Rv2062c	cobN	CGT/CAT	145	R/H	Nonsyn	Coding region
mtbs2321975_C	2321975	525	T	C	829	Rv2064	cobG	GAT/GAC	175	D/D	Syn	Coding region
mtbs2328543_C	2328543	435	T	C	1084	Rv2071c	cobM	ATA/ATG	145	I/M	Nonsyn	Coding region
mtbs2329533_G	2329533	614	A	G	1991	Rv2072c	cobL	CTC/CCC	205	L/P	Nonsyn	Coding region
mtbs2331620_C	2331620	1260	A	C	1091	Rv2075c		GGT/GGG	420	G/G	Syn	Coding region
mtbs2331789_T	2331789	1091	G	T	1004	Rv2075c		CCG/CAG	364	P/Q	Nonsyn	Coding region
mtbs2334007_G	2334007	288	A	G	1768	Rv2077c		GCT/GCC	96	A/A	Syn	Coding region
mtbs2335075_G	2335075	17	A	G	1697	Rv2078		GAA/GGA	6	E/G	Nonsyn	Coding region
mtbs2335494_G	2335494	140	A	G	2015	Rv2079		TAC/TGC	47	Y/C	Nonsyn	Coding region
mtbs2337179_T	2337179	1825	C	T	762	Rv2079		CAA/TAA	609	Q/Stop	Nonsyn	Coding region
mtbs2338810_C	2338810	102	T	C	974	Rv2082		CGT/CGC	34	R/R	Syn	Coding region
mtbs2338811_G	2338811	103	A	G	974	Rv2082		AAG/GAG	35	K/E	Nonsyn	Coding region
mtbs2339255_G	2339255	547	A	G	995	Rv2082		ACT/GCT	183	T/A	Nonsyn	Coding region
mtbs2339835_T	2339835	1127	C	T	822	Rv2082		CCC/CTC	376	P/L	Nonsyn	Coding region
mtbs2340621_G	2340621	1913	C	G	2100	Rv2082		CCC/CGC	638	P/R	Nonsyn	Coding region
mtbs2341636_G	2341636	766	C	G	2180	Rv2083		CTG/GTG	256	L/V	Nonsyn	Coding region
mtbs2344246_C	2344246	1305	G	C	823			ACG/ACC	435	T/T	Syn	Mobile element
mtbs2344499_G	2344499	89	T	G	771	Rv2088	pknJ	CTG/CGG	30	L/R	Nonsyn	Coding region
mtbs2345037_A	2345037	627	C	A	1930	Rv2088	pknJ	CTC/CTA	209	L/L	Syn	Coding region
mtbs2346318_A	2346318	1007	G	A	759	Rv2089c	pepE	CCG/CTG	336	P/L	Nonsyn	Coding region
mtbs2348446_G	2348446	1074	C	G	1948	Rv2090		TTC/TTG	358	F/L	Nonsyn	Coding region
mtbs2354791_G	2354791	520	A	G	836	Rv2096c	pafB	TCG/CCG	174	S/P	Nonsyn	Coding region
mtbs2361604_G	2361604	1365	C	G	2021	Rv2101	helZ	GTC/GTG	455	V/V	Syn	Coding region
mtbs2362041_A	2362041	1802	C	A	1965	Rv2101	helZ	CCG/CAG	601	P/Q	Nonsyn	Coding region
mtbs2364475_C	2364475	46	T	C	759	Rv2103c	vapC37	ACA/GCA	16	T/A	Nonsyn	Coding region
mtbs2369186_C	2369186	544	G	C	991	Rv2109c	prcA	CGT/GGT	182	R/G	Nonsyn	Coding region
mtbs2369326_G	2369326	404	C	G	1311	Rv2109c	prcA	CGC/CCC	135	R/P	Nonsyn	Coding region
mtbs2386389_A	2386389	97	G	A	2031	Rv2125		GGC/AGC	33	G/S	Nonsyn	Coding region
mtbs2387733_C	2387733	240	T	C	2330	Rv2126c	PE_PGRS37	GAA/GAG	80	E/E	Syn	Coding region
mtbs2388641_A	2388641	26	G	A	1075	Rv2127	ansP1	GGC/GAC	9	G/D	Nonsyn	Coding region
mtbs2399734_A	2399734	1015	G	A	857	Rv2139	pyrD	GGC/AGC	339	G/S	Nonsyn	Coding region
mtbs2411496_A	2411496	627	G	A	750	Rv2152c	murC	TTC/TTT	209	F/F	Syn	Coding region
mtbs2413246_A	2413246	106	C	A	1166	Rv2153c	murG	GTG/TTG	36	V/L	Nonsyn	Coding region
mtbs2415656_C	2415656	739	G	C	2304	Rv2155c	murD	CGG/GGG	247	R/G	Nonsyn	Coding region
mtbs2421816_G	2421816	188	A	G	1173	Rv2160c		GTG/GCG	63	V/A	Nonsyn	Coding region
mtbs2424925_G	2424925	2424925	A	G	1869
mtbs2425471_C	2425471	1617	T	C	1033	Rv2163c	pbpB	CGA/CGG	539	R/R	Syn	Coding region
mtbs2440926_T	2440926	795	G	T	1766	Rv2178c	aroG	GAC/GAA	265	D/E	Nonsyn	Coding region
mtbs2442468_T	2442468	747	C	T	800	Rv2180c		TGG/TGA	249	W/Stop	Nonsyn	Coding region
mtbs2448458_T	2448458	299	C	T	982	Rv2187	fadD15	ACC/ATC	100	T/I	Nonsyn	Coding region
mtbs2451700_C	2451700	321	A	C	785	Rv2189c		GCT/GCG	107	A/A	Syn	Coding region
mtbs2462871_A	2462871	177	G	A	1896	Rv2198c	mmpS3	GCC/GCT	59	A/A	Syn	Coding region
mtbs2470591_C	2470591	2470591	A	C	998
mtbs2491597_T	2491597	757	G	T	792	Rv2221c	glnE	CGG/AGG	253	R/R	Syn	Coding region
mtbs2499726_A	2499726	895	G	A	1901	Rv2226		GAT/AAT	299	D/N	Nonsyn	Coding region
mtbs2505085_A	2505085	615	G	A	778	Rv2231c	cobC	GCC/GCT	205	A/A	Syn	Coding region
mtbs2509140_C	2509140	236	G	C	2116	Rv2236c	cobD	TCC/TGC	79	S/C	Nonsyn	Coding region
mtbs2509722_G	2509722	234	A	G	2182	Rv2237		CCA/CCG	78	P/P	Syn	Coding region
mtbs2510350_G	2510350	2510350	C	G	749
mtbs2516567_C	2516567	2516567	G	C	1239
mtbs2521342_C	2521342	600	T	C	2054	Rv2247	accD6	GAT/GAC	200	D/D	Syn	Coding region
mtbs2521428_G	2521428	686	A	G	770	Rv2247	accD6	GAC/GGC	229	D/G	Nonsyn	Coding region
mtbs2522955_G	2522955	596	T	G	781	Rv2248		GTC/GGC	199	V/G	Nonsyn	Coding region
mtbs2526974_C	2526974	1410	T	C	1299	Rv2251		CCT/CCC	470	P/P	Syn	Coding region
mtbs2527575_A	2527575	587	G	A	65	Rv2252		GGC/GAC	196	G/D	Nonsyn	Coding region
mtbs2529680_G	2529680	195	A	G	1859	Rv2256c		ACT/ACC	65	T/T	Syn	Coding region
mtbs2531742_G	2531742	156	A	G	1790	Rv2258c		GCT/GCC	52	A/A	Syn	Coding region
mtbs2533377_C	2533377	48	T	C	893	Rv2260		GAT/GAC	16	D/D	Syn	Coding region
mtbs2536599_T	2536599	1752	C	T	791	Rv2264c		GGG/GGA	584	G/G	Syn	Coding region
mtbs2536892_C	2536892	1459	T	C	861	Rv2264c		ACC/GCC	487	T/A	Nonsyn	Coding region
mtbs2543395_C	2543395	882	T	C	755	Rv2268c	cyp128	GAA/GAG	294	E/E	Syn	Coding region
mtbs2546684_A	2546684	122	C	A	813	Rv2274c	mazF8	GGT/GTT	41	G/V	Nonsyn	Coding region
mtbs2548700_T	2548700	952	C	T	785	Rv2276	cyp121	CAC/TAC	318	H/Y	Nonsyn	Coding region
mtbs2551576_G	2551576	17	C	G	887	Rv2280		GCT/GGT	6	A/G	Nonsyn	Coding region
mtbs2551577_C	2551577	18	T	C	885	Rv2280		GCT/GCC	6	A/A	Syn	Coding region
mtbs2562644_T	2562644	46	G	T	857	Rv2290	lppO	GCG/TCG	16	A/S	Nonsyn	Coding region
mtbs2566768_C	2566768	2566768	A	C	169
mtbs2573756_A	2573756	2573756	C	A	1702
mtbs2578626_G	2578626	71	A	G	1310	Rv2307c		ATG/ACG	24	M/T	Nonsyn	Coding region
mtbs2581052_A	2581052	634	G	A	768	Rv2308		GAC/AAC	212	D/N	Nonsyn	Coding region
mtbs2586076_G	2586076	1215	C	G	834	Rv2314c		CGG/CGC	405	R/R	Syn	Coding region
mtbs2586127_G	2586127	1164	A	G	2086	Rv2314c		GGT/GGC	388	G/G	Syn	Coding region
mtbs2589036_C	2589036	199	G	C	812	Rv2316	uspA	GAC/CAC	67	D/H	Nonsyn	Coding region
mtbs2589216_C	2589216	379	G	C	1314	Rv2316	uspA	GTG/CTG	127	V/L	Nonsyn	Coding region
mtbs2592310_A	2592310	417	G	A	721	Rv2319c		ATC/ATT	139	I/I	Syn	Coding region
mtbs2598400_G	2598400	1548	A	G	1969	Rv2326c		AAT/AAC	516	N/N	Syn	Coding region
mtbs2600260_G	2600260	273	A	G	953	Rv2327		CGA/CGG	91	R/R	Syn	Coding region
mtbs2601576_G	2601576	846	T	G	852	Rv2328	PE23	AGT/AGG	282	S/R	Nonsyn	Coding region
mtbs2601760_A	2601760	1030	G	A	748	Rv2328	PE23	GCC/ACC	344	A/T	Nonsyn	Coding region
mtbs2608117_A	2608117	205	C	A	1441	Rv2333c	stp	GAC/TAC	69	D/Y	Nonsyn	Coding region
mtbs2612256_T	2612256	732	G	T	903	Rv2337c		CTC/CTA	244	L/L	Syn	Coding region
mtbs2612632_A	2612632	356	C	A	2036	Rv2337c		GGC/GTC	119	G/V	Nonsyn	Coding region
mtbs2619271_C	2619271	2619271	T	C	944
mtbs2625924_C	2625924	249	T	C	1111	Rv2346c	esxO	GCA/GCG	83	A/A	Syn	Coding region
mtbs2626004_A	2626004	169	G	A	982	Rv2346c	esxO	CTG/TTG	57	L/L	Syn	Coding region
mtbs2626011_A	2626011	162	G	A	978	Rv2346c	esxO	ATC/ATT	54	I/I	Syn	Coding region
mtbs2626018_C	2626018	155	T	C	914	Rv2346c	esxO	GAG/GGG	52	E/G	Nonsyn	Coding region
mtbs2626513_A	2626513	7	T	A	1081	Rv2347c	esxP	ACA/TCA	3	T/S	Nonsyn	Coding region
mtbs2626514_G	2626514	6	T	G	1082	Rv2347c	esxP	GCA/GCC	2	A/A	Syn	Coding region
mtbs2627618_A	2627618	1081	C	A	761	Rv2349c	plcC	GGC/TGC	361	G/C	Nonsyn	Coding region
mtbs2627946_G	2627946	753	A	G	827	Rv2349c	plcC	CGT/CGC	251	R/R	Syn	Coding region
mtbs2630740_C	2630740	1336	T	C	798	Rv2351c	plcA	ACT/GCT	446	T/A	Nonsyn	Coding region
mtbs2631371_T	2631371	705	C	T	762	Rv2351c	plcA	GTG/GTA	235	V/V	Syn	Coding region
mtbs2634282_G	2634282	2634282	T	G	722
mtbs2637162_T	2637162	2637162	C	T	756
mtbs2637541_T	2637541	2637541	C	T	1181
mtbs2642383_T	2642383	196	C	T	1243	Rv2360c		GCC/ACC	66	A/T	Nonsyn	Coding region
mtbs2647905_A	2647905	463	G	A	763	Rv2366c		CGC/TGC	155	R/C	Nonsyn	Coding region
mtbs2656225_G	2656225	206	A	G	1930	Rv2377c	mbtH	GTC/GCC	69	V/A	Nonsyn	Coding region
mtbs2660319_G	2660319	1767	C	G	1757	Rv2379c	mbtF	GAG/GAC	589	E/D	Nonsyn	Coding region
mtbs2663795_A	2663795	3321	G	A	843	Rv2380c	mbtE	GCC/GCT	1107	A/A	Syn	Coding region
mtbs2673818_G	2673818	2020	C	G	844	Rv2383c	mbtB	GTG/CTG	674	V/L	Nonsyn	Coding region
mtbs2676427_C	2676427	492	T	C	8	Rv2384	mbtA	CTT/CTC	164	L/L	Syn	Coding region
mtbs2680658_G	2680658	2680658	T	G	1775
mtbs2692100_T	2692100	2692100	C	T	730
mtbs2695378_G	2695378	422	C	G	1753	Rv2398c	cysW	GGC/GCC	141	G/A	Nonsyn	Coding region
mtbs2697489_T	2697489	226	C	T	873	Rv2400c	subI	GCG/ACG	76	A/T	Nonsyn	Coding region
mtbs2706663_T	2706663	647	G	T	800	Rv2408	PE24	GGT/GTT	216	G/V	Nonsyn	Coding region
mtbs2711722_G	2711722	1155	T	G	899	Rv2414c		CCA/CCC	385	P/P	Syn	Coding region
mtbs2713795_T	2713795	2713795	C	T	1888
mtbs2718852_G	2718852	2718852	T	G	1921
mtbs2720952_C	2720952	826	T	C	1077	Rv2424c		ACC/GCC	276	T/A	Nonsyn	Coding region
mtbs2720954_A	2720954	824	G	A	1077	Rv2424c		ACC/ATC	275	T/I	Nonsyn	Coding region
mtbs2721562_G	2721562	216	C	G	1231	Rv2424c		GCG/GCC	72	A/A	Syn	Coding region
mtbs2723506_C	2723506	678	T	C	956	Rv2426c		TTA/TTG	226	L/L	Syn	Coding region
mtbs2729058_C	2729058	77	A	C	915	Rv2433c		CTG/CGG	26	L/R	Nonsyn	Coding region
mtbs2734074_C	2734074	845	T	C	2346	Rv2436	rbsK	GTC/GCC	282	V/A	Nonsyn	Coding region
mtbs2737572_A	2737572	676	C	A	1522	Rv2439c	proB	GCG/TCG	226	A/S	Nonsyn	Coding region
mtbs2738274_C	2738274	1413	A	C	873	Rv2440c	obg	AGT/AGG	471	S/R	Nonsyn	Coding region
mtbs2740693_C	2740693	2740693	T	C	1075
mtbs2741209_A	2741209	501	G	A	792	Rv2443	dctA	CTG/CTA	167	L/L	Syn	Coding region
mtbs2746747_G	2746747	852	C	G	9	Rv2447c	folC	GGG/GGC	284	G/G	Syn	Coding region
mtbs2751804_T	2751804	377	C	T	2254	Rv2450c	rpfE	CGG/CAG	126	R/Q	Nonsyn	Coding region
mtbs2752122_C	2752122	59	G	C	886	Rv2450c	rpfE	ACG/AGG	20	T/R	Nonsyn	Coding region
mtbs2752698_A	2752698	2752698	C	A	1796
mtbs2760152_G	2760152	374	A	G	2061	Rv2458	mmuM	TAC/TGC	125	Y/C	Nonsyn	Coding region
mtbs2774555_C	2774555	992	T	C	775	Rv2471	aglA	GTG/GCG	331	V/A	Nonsyn	Coding region
mtbs2775361_T	2775361	90	C	T	810	Rv2472		CGC/CGT	30	R/R	Syn	Coding region
mtbs2779136_C	2779136	3127	T	C	1999	Rv2476c	gdh	AGC/GGC	1043	S/G	Nonsyn	Coding region
mtbs2786952_G	2786952	2332	A	G	1962	Rv2482c	plsB2	TGC/CGC	778	C/R	Nonsyn	Coding region
mtbs2789798_T	2789798	1225	G	T	751	Rv2483c	plsC	CGG/AGG	409	R/R	Syn	Coding region
mtbs2791098_T	2791098	1397	C	T	1089	Rv2484c		GGT/GAT	466	G/D	Nonsyn	Coding region
mtbs2793810_A	2793810	179	C	A	789	Rv2485c	lipQ	CGC/CTC	60	R/L	Nonsyn	Coding region
mtbs2794071_A	2794071	2794071	G	A	738
mtbs2800087_A	2800087	794	G	A	778	Rv2488c		ACC/ATC	265	T/I	Nonsyn	Coding region
mtbs2807486_A	2807486	209	C	A	924	Rv2492		GCC/GAC	70	A/D	Nonsyn	Coding region
mtbs2808452_C	2808452	143	T	C	767	Rv2494	vapC38	GTG/GCG	48	V/A	Nonsyn	Coding region
mtbs2809621_C	2809621	319	T	C	2199	Rv2495c	bkdC	ACC/GCC	107	T/A	Nonsyn	Coding region
mtbs2809633_C	2809633	307	A	C	830	Rv2495c	bkdC	TAC/GAC	103	Y/D	Nonsyn	Coding region
mtbs2817269_T	2817269	1206	C	T	65	Rv2502c	accD1	AAG/AAA	402	K/K	Syn	Coding region
mtbs2817502_C	2817502	973	A	C	747	Rv2502c	accD1	TTT/GTT	325	F/V	Nonsyn	Coding region
mtbs2818837_G	2818837	291	A	G	1985	Rv2503c	scoB	GGT/GGC	97	G/G	Syn	Coding region
mtbs2821342_T	2821342	255	C	T	1994	Rv2505c	fadD35	GCG/GCA	85	A/A	Syn	Coding region
mtbs2825466_A	2825466	789	G	A	984	Rv2509		AAG/AAA	263	K/K	Syn	Coding region
mtbs2825581_G	2825581	1509	T	G	787	Rv2510c		ATA/ATC	503	I/I	Syn	Coding region
mtbs2827984_T	2827984	2827984	G	T	1919
mtbs2828019_C	2828019	2828019	T	C	1953
mtbs2829779_C	2829779	25	T	C	1506	Rv2512c		ACC/GCC	9	T/A	Nonsyn	Coding region
mtbs2830525_A	2830525	365	C	A	1870	Rv2513		ACG/AAG	122	T/K	Nonsyn	Coding region
mtbs2833329_A	2833329	185	G	A	779	Rv2516c		GCT/GTT	62	A/V	Nonsyn	Coding region
mtbs2835984_C	2835984	200	T	C	774	Rv2519	PE26	GTG/GCG	67	V/A	Nonsyn	Coding region
mtbs2838897_G	2838897	645	C	G	691	Rv2522c		ATG/ATC	215	M/I	Nonsyn	Coding region
mtbs2841022_G	2841022	8311	A	G	1157	Rv2524c	fas	TGC/CGC	2771	C/R	Nonsyn	Coding region
mtbs2847281_G	2847281	2052	A	G	1010	Rv2524c	fas	GAT/GAC	684	D/D	Syn	Coding region
mtbs2850631_C	2850631	2850631	T	C	719
mtbs2855259_G	2855259	2523	A	G	2178	Rv2531c		GCT/GCC	841	A/A	Syn	Coding region
mtbs2865760_G	2865760	631	A	G	1909	Rv2542		ACC/GCC	211	T/A	Nonsyn	Coding region
mtbs2865882_C	2865882	753	T	C	1782	Rv2542		GTT/GTC	251	V/V	Syn	Coding region
mtbs2866607_A	2866607	140	G	A	848	Rv2543	lppA	GGC/GAC	47	G/D	Nonsyn	Coding region
mtbs2866647_A	2866647	180	G	A	796	Rv2543	lppA	AAG/AAA	60	K/K	Syn	Coding region
mtbs2866671_A	2866671	204	G	A	766	Rv2543	lppA	GAG/GAA	68	E/E	Syn	Coding region
mtbs2866677_C	2866677	210	A	C	767	Rv2543	lppA	CTA/CTC	70	L/L	Syn	Coding region
mtbs2866744_A	2866744	277	G	A	714	Rv2543	lppA	GAC/AAC	93	D/N	Nonsyn	Coding region
mtbs2866745_C	2866745	278	A	C	717	Rv2543	lppA	GAC/GCC	93	D/A	Nonsyn	Coding region
mtbs2866749_A	2866749	282	C	A	722	Rv2543	lppA	GAC/GAA	94	D/E	Nonsyn	Coding region
mtbs2866773_C	2866772	304	A	C	1	Rv2543	lppA	GAC/GCC	102	D/A	Nonsyn	Coding region
mtbs2866805_G	2866805	338	C	G	29	Rv2543	lppA	GCG/GGG	113	A/G	Nonsyn	Coding region
mtbs2866806_C	2866806	339	G	C	30	Rv2543	lppA	GCG/GCC	113	A/A	Syn	Coding region
mtbs2866815_C	2866815	348	G	C	55	Rv2543	lppA	GCG/GCC	116	A/A	Syn	Coding region
mtbs2866831_G	2866831	364	A	G	43	Rv2543	lppA	AAC/GAC	122	N/D	Nonsyn	Coding region
mtbs2866839_T	2866839	372	A	T	74	Rv2543	lppA	GTA/GTT	124	V/V	Syn	Coding region
mtbs2866842_C	2866842	375	G	C	220	Rv2543	lppA	ATG/ATC	125	M/I	Nonsyn	Coding region
mtbs2866845_T	2866845	378	C	T	292	Rv2543	lppA	TTC/TTT	126	F/F	Syn	Coding region
mtbs2866848_T	2866848	381	C	T	490	Rv2543	lppA	GGC/GGT	127	G/G	Syn	Coding region
mtbs2866849_A	2866849	382	G	A	500	Rv2543	lppA	GCC/ACC	128	A/T	Nonsyn	Coding region
mtbs2866851_T	2866851	384	C	T	500	Rv2543	lppA	GCC/GCT	128	A/A	Syn	Coding region
mtbs2866852_G	2866852	385	A	G	504	Rv2543	lppA	ACG/GCG	129	T/A	Nonsyn	Coding region
mtbs2866863_G	2866863	396	C	G	857	Rv2543	lppA	GCC/GCG	132	A/A	Syn	Coding region
mtbs2866876_G	2866876	409	A	G	927	Rv2543	lppA	ATT/GTT	137	I/V	Nonsyn	Coding region
mtbs2866880_T	2866880	413	C	T	924	Rv2543	lppA	GCC/GTC	138	A/V	Nonsyn	Coding region
mtbs2866882_A	2866882	415	G	A	927	Rv2543	lppA	GCC/ACC	139	A/T	Nonsyn	Coding region
mtbs2867207_G	2867207	84	C	G	1239	Rv2544	lppB	GCC/GCG	28	A/A	Syn	Coding region
mtbs2867230_A	2867230	107	G	A	1085	Rv2544	lppB	GGC/GAC	36	G/D	Nonsyn	Coding region
mtbs2867231_T	2867231	108	C	T	1072	Rv2544	lppB	GGC/GGT	36	G/G	Syn	Coding region
mtbs2867236_G	2867236	113	A	G	1059	Rv2544	lppB	AAC/AGC	38	N/S	Nonsyn	Coding region
mtbs2867240_T	2867240	117	C	T	1047	Rv2544	lppB	CCC/CCT	39	P/P	Syn	Coding region
mtbs2867245_C	2867245	122	A	C	1100	Rv2544	lppB	AAA/ACA	41	K/T	Nonsyn	Coding region
mtbs2867251_G	2867251	128	C	G	1049	Rv2544	lppB	CCG/CGG	43	P/R	Nonsyn	Coding region
mtbs2867254_G	2867254	131	A	G	1055	Rv2544	lppB	CAC/CGC	44	H/R	Nonsyn	Coding region
mtbs2867263_A	2867263	140	G	A	1113	Rv2544	lppB	GGC/GAC	47	G/D	Nonsyn	Coding region
mtbs2867298_A	2867298	175	C	A	1097	Rv2544	lppB	CAC/AAC	59	H/N	Nonsyn	Coding region
mtbs2867347_G	2867347	224	A	G	984	Rv2544	lppB	CAG/CGG	75	Q/R	Nonsyn	Coding region
mtbs2867401_C	2867401	278	A	C	677	Rv2544	lppB	AAC/ACC	93	N/T	Nonsyn	Coding region
mtbs2867405_A	2867405	282	C	A	472	Rv2544	lppB	GAC/GAA	94	D/E	Nonsyn	Coding region
mtbs2867436_G	2867435	311	T	G	1	Rv2544	lppB	AAT/AAG	104	N/K	Nonsyn	Coding region
mtbs2867458_C	2867458	335	G	C	70	Rv2544	lppB	AGT/ACT	112	S/T	Nonsyn	Coding region
mtbs2867459_C	2867459	336	T	C	66	Rv2544	lppB	AGT/AGC	112	S/S	Syn	Coding region
mtbs2867461_G	2867461	338	C	G	72	Rv2544	lppB	GCC/GGC	113	A/G	Nonsyn	Coding region
mtbs2867483_C	2867483	360	G	C	32	Rv2544	lppB	ATG/ATC	120	M/I	Nonsyn	Coding region
mtbs2867487_G	2867487	364	A	G	14	Rv2544	lppB	AAA/GAA	122	K/E	Nonsyn	Coding region
mtbs2867496_A	2867496	373	G	A	13	Rv2544	lppB	GAC/AAC	125	D/N	Nonsyn	Coding region
mtbs2867497_T	2867497	374	A	T	10	Rv2544	lppB	GAC/GTC	125	D/V	Nonsyn	Coding region
mtbs2867501_T	2867501	378	C	T	18	Rv2544	lppB	TTC/TTT	126	F/F	Syn	Coding region
mtbs2867510_G	2867510	387	A	G	36	Rv2544	lppB	ACA/ACG	129	T/T	Syn	Coding region
mtbs2867522_G	2867522	399	A	G	603	Rv2544	lppB	GAA/GAG	133	E/E	Syn	Coding region
mtbs2867532_G	2867532	409	A	G	806	Rv2544	lppB	ATT/GTT	137	I/V	Nonsyn	Coding region
mtbs2867536_T	2867536	413	C	T	814	Rv2544	lppB	GCC/GTC	138	A/V	Nonsyn	Coding region
mtbs2867538_A	2867538	415	G	A	821	Rv2544	lppB	GCC/ACC	139	A/T	Nonsyn	Coding region
mtbs2867552_G	2867552	429	A	G	876	Rv2544	lppB	CGA/CGG	143	R/R	Syn	Coding region
mtbs2867575_C	2867575	452	T	C	920	Rv2544	lppB	GTG/GCG	151	V/A	Nonsyn	Coding region
mtbs2867594_A	2867594	471	G	A	890	Rv2544	lppB	CTG/CTA	157	L/L	Syn	Coding region
mtbs2867756_C	2867756	633	T	C	956	Rv2544	lppB	ATT/ATC	211	I/I	Syn	Coding region
mtbs2878550_A	2878550	2878550	G	A	678
mtbs2880702_C	2880702	628	G	C	1689	Rv2560		GTC/CTC	210	V/L	Nonsyn	Coding region
mtbs2881974_A	2881974	217	G	A	755	Rv2562		GCC/ACC	73	A/T	Nonsyn	Coding region
mtbs2884068_C	2884068	727	A	C	854	Rv2564	glnQ	ATG/CTG	243	M/L	Nonsyn	Coding region
mtbs2886570_G	2886570	198	A	G	1047	Rv2566		GAA/GAG	66	E/E	Syn	Coding region
mtbs2888201_C	2888201	1829	T	C	2067	Rv2566		CTC/CCC	610	L/P	Nonsyn	Coding region
mtbs2889633_C	2889633	3261	T	C	2324	Rv2566		GCT/GCC	1087	A/A	Syn	Coding region
mtbs2891267_T	2891267	1473	C	T	2019	Rv2567		GGC/GGT	491	G/G	Syn	Coding region
mtbs2891728_G	2891728	1934	A	G	2097	Rv2567		CAG/CGG	645	Q/R	Nonsyn	Coding region
mtbs2894208_A	2894208	201	G	A	2074	Rv2569c		AGC/AGT	67	S/S	Syn	Coding region
mtbs2898522_C	2898522	480	T	C	919	Rv2573		TAT/TAC	160	Y/Y	Syn	Coding region
mtbs2903439_A	2903439	93	G	A	851	Rv2578c		AGC/AGT	31	S/S	Syn	Coding region
mtbs2910461_T	2910461	440	G	T	2270	Rv2584c	apt	GCG/GAG	147	A/E	Nonsyn	Coding region
mtbs2911293_G	2911293	1385	C	G	2078	Rv2585c		TGT/TCT	462	C/S	Nonsyn	Coding region
mtbs2912294_G	2912294	384	T	G	1976	Rv2585c		GCA/GCC	128	A/A	Syn	Coding region
mtbs2913918_T	2913918	94	C	T	9	Rv2586c	secF	GGC/AGC	32	G/S	Nonsyn	Coding region
mtbs2915934_G	2915934	260	T	G	66	Rv2588c	yajC	GAC/GCC	87	D/A	Nonsyn	Coding region
mtbs2922591_A	2922591	1041	C	A	722	Rv2591	PE_PGRS44	GCC/GCA	347	A/A	Syn	Coding region
mtbs2922846_T	2922846	1296	C	T	891	Rv2591	PE_PGRS44	GGC/GGT	432	G/G	Syn	Coding region
mtbs2922848_T	2922848	1298	A	T	896	Rv2591	PE_PGRS44	CAG/CTG	433	Q/L	Nonsyn	Coding region
mtbs2923391_C	2923391	843	T	C	2301	Rv2592c	ruvB	CCA/CCG	281	P/P	Syn	Coding region
mtbs2925962_C	2925962	229	T	C	971	Rv2596	vapC40	TGC/CGC	77	C/R	Nonsyn	Coding region
mtbs2927939_C	2927939	2927939	T	C	1893
mtbs2939372_G	2939372	591	A	G	63	Rv2611c		TCT/TCC	197	S/S	Syn	Coding region
mtbs2939373_C	2939373	590	G	C	2043	Rv2611c		TCT/TGT	197	S/C	Nonsyn	Coding region
mtbs2939657_C	2939657	306	T	C	2134	Rv2611c		ATA/ATG	102	I/M	Nonsyn	Coding region
mtbs2944515_C	2944515	471	A	C	697	Rv2615c	PE_PGRS45	GGT/GGG	157	G/G	Syn	Coding region
mtbs2944524_G	2944524	462	C	G	688	Rv2615c	PE_PGRS45	GGG/GGC	154	G/G	Syn	Coding region
mtbs2944769_C	2944769	217	G	C	49	Rv2615c	PE_PGRS45	CAA/GAA	73	Q/E	Nonsyn	Coding region
mtbs2944773_G	2944773	213	A	G	48	Rv2615c	PE_PGRS45	TAT/TAC	71	Y/Y	Syn	Coding region
mtbs2948230_A	2948230	329	G	A	858	Rv2621c		GCC/GTC	110	A/V	Nonsyn	Coding region
mtbs2954439_C	2954439	310	T	C	1865	Rv2627c		AGA/GGA	104	R/G	Nonsyn	Coding region
mtbs2955957_C	2955957	191	A	C	813	Rv2629		GAT/GCT	64	D/A	Nonsyn	Coding region
mtbs2969197_G	2969197	2969197	A	G	731
mtbs2974933_G	2974933	302	A	G	1957	Rv2650c		ATC/ACC	101	I/T	Nonsyn	Coding region
mtbs2975227_G	2975227	8	T	G	872	Rv2650c		AAT/ACT	3	N/T	Nonsyn	Coding region
mtbs2980861_G	2980861	2980861	A	G	729
mtbs2982829_G	2982829	131	T	G	64	Rv2665		CTC/CGC	44	L/R	Nonsyn	Coding region
mtbs2983095_G	2983095	25	A	G	1104	Rv2666		ACC/GCC	9	T/A	Nonsyn	Coding region
mtbs2983613_A	2983613	543	G	A	1039	Rv2666		GGG/GGA	181	G/G	Syn	Coding region
mtbs2983873_G	2983873	803	A	G	781	Rv2666		TAA/TGA	268	Stop/Stop	Syn	Coding region
mtbs2984740_G	2984740	8	A	G	2151	Rv2668		CAC/CGC	3	H/R	Nonsyn	Coding region
mtbs2988630_G	2988630	949	C	G	1060	Rv2672		CAT/GAT	317	H/D	Nonsyn	Coding region
mtbs2994187_C	2994187	876	T	C	1146	Rv2678c	hemE	TTA/TTG	292	L/L	Syn	Coding region
mtbs3003115_G	3003115	1133	C	G	996	Rv2685	arsB1	GCA/GGA	378	A/G	Nonsyn	Coding region
mtbs3005185_T	3005185	466	G	T	1830	Rv2688c		CCC/ACC	156	P/T	Nonsyn	Coding region
mtbs3009692_G	3009692	349	A	G	1845	Rv2691	ceoB	ACC/GCC	117	T/A	Nonsyn	Coding region
mtbs3009834_G	3009834	491	A	G	761	Rv2691	ceoB	GAT/GGT	164	D/G	Nonsyn	Coding region
mtbs3010420_G	3010420	397	A	G	1046	Rv2692	ceoC	ATC/GTC	133	I/V	Nonsyn	Coding region
mtbs3010993_T	3010993	376	C	T	834	Rv2693c		GGG/AGG	126	G/R	Nonsyn	Coding region
mtbs3017465_C	3017465	608	T	C	1860	Rv2702	ppgK	ATA/ACA	203	I/T	Nonsyn	Coding region
mtbs3024021_A	3024021	457	C	A	814	Rv2711	ideR	CGG/AGG	153	R/R	Syn	Coding region
mtbs3024343_A	3024343	986	G	A	781	Rv2712c		ACC/ATC	329	T/I	Nonsyn	Coding region
mtbs3027798_C	3027798	734	T	C	1189	Rv2714		GTG/GCG	245	V/A	Nonsyn	Coding region
mtbs3031168_G	3031168	370	A	G	1159	Rv2719c		TAT/CAT	124	Y/H	Nonsyn	Coding region
mtbs3033189_A	3033189	1431	G	A	769	Rv2721c		CCC/CCT	477	P/P	Syn	Coding region
mtbs3036826_T	3036826	466	C	T	743	Rv2724c	fadE20	GTG/ATG	156	V/M	Nonsyn	Coding region
mtbs3037377_C	3037377	3037377	T	C	1432
mtbs3041871_T	3041871	605	G	T	1800	Rv2729c		GCG/GAG	202	A/E	Nonsyn	Coding region
mtbs3048912_G	3048912	175	C	G	859	Rv2736c	recX	GTT/CTT	59	V/L	Nonsyn	Coding region
mtbs3054081_G	3054081	168	A	G	1828	Rv2741	PE_PGRS47	GGA/GGG	56	G/G	Syn	Coding region
mtbs3054321_G	3054321	408	A	G	2269	Rv2741	PE_PGRS47	GGA/GGG	136	G/G	Syn	Coding region
mtbs3054724_G	3054724	811	A	G	1625	Rv2741	PE_PGRS47	AGC/GGC	271	S/G	Nonsyn	Coding region
mtbs3056767_T	3056767	466	G	T	712	Rv2743c		CCG/ACG	156	P/T	Nonsyn	Coding region
mtbs3069167_G	3069167	917	A	G	1273	Rv2756c	hsdM	CTG/CCG	306	L/P	Nonsyn	Coding region
mtbs3078178_T	3078178	808	C	T	1343	Rv2769c	PE27	GTG/ATG	270	V/M	Nonsyn	Coding region
mtbs3079877_G	3079877	581	A	G	1033	Rv2770c	PPE44	TTC/TCC	194	F/S	Nonsyn	Coding region
mtbs3080795_G	3080795	239	A	G	1915	Rv2771c		CTC/CCC	80	L/P	Nonsyn	Coding region
mtbs3086788_C	3086788	3086788	T	C	1647
mtbs3103682_C	3103682	259	T	C	2096	Rv2794c	pptT	ATG/GTG	87	M/V	Nonsyn	Coding region
mtbs3104189_G	3104189	723	A	G	948	Rv2795c		TGT/TGC	241	C/C	Syn	Coding region
mtbs3110140_T	3110140	3110140	G	T	729
mtbs3111476_T	3111476	348	C	T	865	Rv2802c		TCG/TCA	116	S/S	Syn	Coding region
mtbs3112877_A	3112877	11	G	A	1045	Rv2805		GGC/GAC	4	G/D	Nonsyn	Coding region
mtbs3113872_T	3113872	215	A	T	2123	Rv2807		GAG/GTG	72	E/V	Nonsyn	Coding region
mtbs3115384_C	3115384	3115384	G	C	821
mtbs3118000_G	3118000	1183	A	G	2105	Rv2812		AGG/GGG	395	R/G	Nonsyn	Coding region
mtbs3133054_G	3133054	486	C	G	1152	Rv2825c		TCG/TCC	162	S/S	Syn	Coding region
mtbs3133055_C	3133055	485	G	C	1150	Rv2825c		TCG/TGG	162	S/W	Nonsyn	Coding region
mtbs3133536_C	3133536	4	T	C	1709	Rv2825c		AAA/GAA	2	K/E	Nonsyn	Coding region
mtbs3135606_G	3135606	3135606	A	G	734
mtbs3135912_C	3135912	422	G	C	1068	Rv2828c		ACG/AGG	141	T/R	Nonsyn	Coding region
mtbs3135950_G	3135950	384	C	G	1033	Rv2828c		TCG/TCC	128	S/S	Syn	Coding region
mtbs3135951_C	3135951	383	G	C	1035	Rv2828c		TCG/TGG	128	S/W	Nonsyn	Coding region
mtbs3137058_A	3137058	167	G	A	1982	Rv2830c	vapB22	GCG/GTG	56	A/V	Nonsyn	Coding region
mtbs3137736_T	3137736	466	G	T	859	Rv2831	echA16	GAC/TAC	156	D/Y	Nonsyn	Coding region
mtbs3144623_T	3144623	23	C	T	814	Rv2837c		AGT/AAT	8	S/N	Nonsyn	Coding region
mtbs3162805_G	3162805	538	C	G	2105	Rv2853	PE_PGRS48	CGC/GGC	180	R/G	Nonsyn	Coding region
mtbs3165636_A	3165636	432	G	A	748	Rv2855	mtr	TCG/TCA	144	S/S	Syn	Coding region
mtbs3174496_G	3174496	148	A	G	990	Rv2862c		TGT/CGT	50	C/R	Nonsyn	Coding region
mtbs3177452_A	3177452	3177452	C	A	718
mtbs3177884_A	3177884	63	C	A	2078	Rv2866	relG	CGC/CGA	21	R/R	Syn	Coding region
mtbs3180988_A	3180988	775	C	A	1048	Rv2869c	rip	GTC/TTC	259	V/F	Nonsyn	Coding region
mtbs3186860_G	3186860	2014	T	G	2208	Rv2874	dipZ	TAT/GAT	672	Y/D	Nonsyn	Coding region
mtbs3189242_G	3189242	156	A	G	1089	Rv2878c	mpt53	GCT/GCC	52	A/A	Syn	Coding region
mtbs3200282_T	3200282	17	C	T	792	Rv2891		GCG/GTG	6	A/V	Nonsyn	Coding region
mtbs3209156_A	3209156	251	G	A	852	Rv2899c	fdhD	GCC/GTC	84	A/V	Nonsyn	Coding region
mtbs3214869_G	3214869	242	A	G	805	Rv2905	lppW	CAG/CGG	81	Q/R	Nonsyn	Coding region
mtbs3221352_C	3221352	347	T	C	9	Rv2913c		GAG/GGG	116	E/G	Nonsyn	Coding region
mtbs3226181_C	3226181	105	A	C	1956	Rv2916c	ffh	CGT/CGG	35	R/R	Syn	Coding region
mtbs3228143_T	3228143	1781	G	T	2239	Rv2917		CGG/CTG	594	R/L	Nonsyn	Coding region
mtbs3247316_G	3247316	1872	C	G	1993	Rv2931	ppsA	GAC/GAG	624	D/E	Nonsyn	Coding region
mtbs3247851_A	3247851	2407	G	A	2030	Rv2931	ppsA	GCC/ACC	803	A/T	Nonsyn	Coding region
mtbs3247853_T	3247853	2409	C	T	2030	Rv2931	ppsA	GCC/GCT	803	A/A	Syn	Coding region
mtbs3247856_C	3247856	2412	G	C	2121	Rv2931	ppsA	CGG/CGC	804	R/R	Syn	Coding region
mtbs3247874_A	3247874	2430	G	A	1923	Rv2931	ppsA	CGG/CGA	810	R/R	Syn	Coding region
mtbs3247877_C	3247877	2433	T	C	1980	Rv2931	ppsA	TTT/TTC	811	F/F	Syn	Coding region
mtbs3247883_C	3247883	2439	T	C	2129	Rv2931	ppsA	AGT/AGC	813	S/S	Syn	Coding region
mtbs3248074_A	3248074	2630	G	A	2036	Rv2931	ppsA	CGC/CAC	877	R/H	Nonsyn	Coding region
mtbs3248075_T	3248075	2631	C	T	2035	Rv2931	ppsA	CGC/CGT	877	R/R	Syn	Coding region
mtbs3249025_G	3249025	3581	T	G	757	Rv2931	ppsA	CTA/CGA	1194	L/R	Nonsyn	Coding region
mtbs3256494_G	3256494	810	A	G	1875	Rv2933	ppsC	GGA/GGG	270	G/G	Syn	Coding region
mtbs3266030_G	3266030	3783	A	G	1174	Rv2934	ppsD	TCA/TCG	1261	S/S	Syn	Coding region
mtbs3269581_G	3269581	1845	A	G	1913	Rv2935	ppsE	GCA/GCG	615	A/A	Syn	Coding region
mtbs3270784_G	3270784	3048	A	G	1996	Rv2935	ppsE	CAA/CAG	1016	Q/Q	Syn	Coding region
mtbs3276703_G	3276703	6013	T	G	787	Rv2940c	mas	ACT/CCT	2005	T/P	Nonsyn	Coding region
mtbs3284640_G	3284640	1306	A	G	736	Rv2941	fadD28	ACA/GCA	436	T/A	Nonsyn	Coding region
mtbs3284855_T	3284855	1521	C	T	756	Rv2941	fadD28	ATC/ATT	507	I/I	Syn	Coding region
mtbs3296843_G	3296843	998	A	G	2195	Rv2947c	pks15	GTG/GCG	333	V/A	Nonsyn	Coding region
mtbs3304966_A	3304966	526	G	A	756	Rv2952		GGG/AGG	176	G/R	Nonsyn	Coding region
mtbs3308606_A	3308606	3308606	G	A	1807
mtbs3310174_A	3310174	705	G	A	703	Rv2957		AAG/AAA	235	K/K	Syn	Coding region
mtbs3310427_C	3310427	3310427	T	C	717
mtbs3310626_C	3310626	3310626	T	C	746
mtbs3314412_G	3314412	711	A	G	1025	Rv2962c		GCT/GCC	237	A/A	Syn	Coding region
mtbs3316955_C	3316955	427	A	C	841	Rv2964	purU	ATG/CTG	143	M/L	Nonsyn	Coding region
mtbs3326554_C	3326554	454	A	C	953	Rv2971		AAC/CAC	152	N/H	Nonsyn	Coding region
mtbs3332110_A	3332110	645	G	A	65	Rv2976c	ung	GTC/GTT	215	V/V	Syn	Coding region
mtbs3335708_C	3335708	41	G	C	936	Rv2979c		CCG/CGG	14	P/R	Nonsyn	Coding region
mtbs3338603_C	3338603	397	G	C	2095	Rv2982c	gpdA2	CCG/GCG	133	P/A	Nonsyn	Coding region
mtbs3352932_G	3352932	537	C	G	1286	Rv2995c	leuB	ACG/ACC	179	T/T	Syn	Coding region
mtbs3358235_T	3358235	634	A	T	1883	Rv2999	lppY	ATG/TTG	212	M/L	Nonsyn	Coding region
mtbs3363338_G	3363338	3363338	A	G	1875
mtbs3367765_A	3367765	1029	G	A	1921	Rv3009c	gatB	GGC/GGT	343	G/G	Syn	Coding region
mtbs3375165_C	3375165	500	A	C	903	Rv3015c		TTC/TGC	167	F/C	Nonsyn	Coding region
mtbs3379432_C	3379432	1021	T	C	647	Rv3021c	PPE47	AGC/GGC	341	S/G	Nonsyn	Miscellaneous feature
mtbs3379708_C	3379708	745	G	C	1424	Rv3021c	PPE47	CTG/GTG	249	L/V	Nonsyn	Miscellaneous feature
mtbs3379712_C	3379712	741	G	C	1406	Rv3021c	PPE47	GCC/GCG	247	A/A	Syn	Miscellaneous feature
mtbs3379718_C	3379718	735	T	C	1400	Rv3021c	PPE47	GGA/GGG	245	G/G	Syn	Miscellaneous feature
mtbs3379731_T	3379731	722	G	T	4	Rv3021c	PPE47	GCC/GAC	241	A/D	Nonsyn	Miscellaneous feature
mtbs3379742_C	3379742	711	T	C	1434	Rv3021c	PPE47	GTA/GTG	237	V/V	Syn	Miscellaneous feature
mtbs3379751_C	3379751	702	A	C	1562	Rv3021c	PPE47	GTT/GTG	234	V/V	Syn	Miscellaneous feature
mtbs3379757_C	3379757	696	A	C	1603	Rv3021c	PPE47	GCT/GCG	232	A/A	Syn	Miscellaneous feature
mtbs3379763_A	3379763	690	G	A	1621	Rv3021c	PPE47	GCC/GCT	230	A/A	Syn	Miscellaneous feature
mtbs3379784_A	3379784	669	C	A	1665	Rv3021c	PPE47	GGG/GGT	223	G/G	Syn	Miscellaneous feature
mtbs3379788_G	3379788	665	C	G	1662	Rv3021c	PPE47	GGG/GCG	222	G/A	Nonsyn	Miscellaneous feature
mtbs3380534_G	3380534	149	A	G	698	Rv3022c	PPE48	GTG/GCG	50	V/A	Nonsyn	Miscellaneous feature
mtbs3401871_G	3401871	48	A	G	1464	Rv3041c		GCT/GCC	16	A/A	Syn	Coding region
mtbs3402816_T	3402816	347	C	T	1785	Rv3042c	serB2	GGA/GAA	116	G/E	Nonsyn	Coding region
mtbs3404376_G	3404376	546	C	G	1256	Rv3043c	ctaD	ACG/ACC	182	T/T	Syn	Coding region
mtbs3408150_C	3408150	157	T	C	778	Rv3047c		ACA/GCA	53	T/A	Nonsyn	Coding region
mtbs3412611_C	3412611	1556	T	C	748	Rv3051c	nrdE	CAG/CGG	519	Q/R	Nonsyn	Coding region
mtbs3420825_G	3420825	1334	A	G	999	Rv3059	cyp136	GAC/GGC	445	D/G	Nonsyn	Coding region
mtbs3425854_T	3425854	271	C	T	1995	Rv3062	ligB	CCG/TCG	91	P/S	Nonsyn	Coding region
mtbs3428917_A	3428917	1675	C	A	1906	Rv3063	cstA	CGT/AGT	559	R/S	Nonsyn	Coding region
mtbs3440464_G	3440464	924	T	G	2010	Rv3077		CGT/CGG	308	R/R	Syn	Coding region
mtbs3440468_C	3440468	928	G	C	2025	Rv3077		GGC/CGC	310	G/R	Nonsyn	Coding region
mtbs3446699_G	3446699	660	C	G	861	Rv3081		TTC/TTG	220	F/L	Nonsyn	Coding region
mtbs3447293_G	3447293	3447293	T	G	723
mtbs3450725_C	3450725	729	T	C	1414	Rv3084	lipR	GTT/GTC	243	V/V	Syn	Coding region
mtbs3454263_G	3454263	1339	C	G	1039	Rv3087		CTC/GTC	447	L/V	Nonsyn	Coding region
mtbs3455686_C	3455686	1347	G	C	1305	Rv3088	tgs4	CTG/CTC	449	L/L	Syn	Coding region
mtbs3456666_G	3456666	906	A	G	1987	Rv3089	fadD13	GCA/GCG	302	A/A	Syn	Coding region
mtbs3462135_C	3462135	630	G	C	2100	Rv3093c		TGC/TGG	210	C/W	Nonsyn	Coding region
mtbs3466919_G	3466919	173	C	G	986	Rv3097c	lipY	GGC/GCC	58	G/A	Nonsyn	Coding region
mtbs3467465_G	3467465	198	C	G	951	Rv3098c		GCG/GCC	66	A/A	Syn	Coding region
mtbs3477942_G	3477942	294	A	G	739	Rv3109	moaA1	ACA/ACG	98	T/T	Syn	Coding region
mtbs3480474_A	3480474	401	G	A	1198	Rv3113		GGA/GAA	134	G/E	Nonsyn	Coding region
mtbs3480789_C	3480789	31	T	C	1055	Rv3114		TCA/CCA	11	S/P	Nonsyn	Coding region
mtbs3482717_G	3482717	6	A	G	543			CGT/CGC	2	R/R	Syn	Repeat region
mtbs3484126_A	3484126	153	G	A	701	Rv3117	cysA3	CTG/CTA	51	L/L	Syn	Coding region
mtbs3486977_G	3486977	469	A	G	1848	Rv3121	cyp141	AAA/GAA	157	K/E	Nonsyn	Coding region
mtbs3487108_T	3487108	600	C	T	740	Rv3121	cyp141	GCC/GCT	200	A/A	Syn	Coding region
mtbs3498198_T	3498198	1068	C	T	745	Rv3132c	devS	GAG/GAA	356	E/E	Syn	Coding region
mtbs3500149_A	3500149	601	G	A	768	Rv3134c		CTG/TTG	201	L/L	Syn	Coding region
mtbs3500243_C	3500243	507	G	C	887	Rv3134c		GCC/GCG	169	A/A	Syn	Coding region
mtbs3503895_T	3503895	503	C	T	2024	Rv3137		CCG/CTG	168	P/L	Nonsyn	Coding region
mtbs3508970_G	3508970	876	A	G	866	Rv3141	fadB4	GAA/GAG	292	E/E	Syn	Coding region
mtbs3509626_A	3509626	3509626	C	A	722
mtbs3510120_G	3510120	1198	T	G	1062	Rv3144c	PPE52	AAG/CAG	400	K/Q	Nonsyn	Coding region
mtbs3518167_G	3518167	1422	A	G	2109	Rv3151	nuoG	ATA/ATG	474	I/M	Nonsyn	Coding region
mtbs3518555_G	3518555	1810	A	G	2090	Rv3151	nuoG	ACG/GCG	604	T/A	Nonsyn	Coding region
mtbs3529067_C	3529067	97	G	C	1182	Rv3159c	PPE53	CGT/GGT	33	R/G	Nonsyn	Coding region
mtbs3530955_G	3530955	184	C	G	1028	Rv3161c		GTC/CTC	62	V/L	Nonsyn	Coding region
mtbs3542049_A	3542049	3542049	G	A	738
mtbs3542219_A	3542219	82	G	A	737	Rv3174		GGT/AGT	28	G/S	Nonsyn	Coding region
mtbs3543031_A	3543031	172	G	A	539	Rv3175		GCC/ACC	58	A/T	Nonsyn	Coding region
mtbs3550347_T	3550347	3550347	C	T	733
mtbs3550789_G	3550789	75	C	G	780	Rv3183		GCC/GCG	25	A/A	Syn	Coding region
mtbs3556275_G	3556275	413	A	G	1757	Rv3190c		CTG/CCG	138	L/P	Nonsyn	Coding region
mtbs3570220_C	3570220	992	T	C	64	Rv3198c	uvrD2	GAG/GGG	331	E/G	Nonsyn	Coding region
mtbs3571828_C	3571828	716	G	C	752	Rv3199c	nudC	CCG/CGG	239	P/R	Nonsyn	Coding region
mtbs3576231_C	3576231	806	T	C	853	Rv3201c		CAG/CGG	269	Q/R	Nonsyn	Coding region
mtbs3577497_T	3577497	2704	C	T	790	Rv3202c		GAA/AAA	902	E/K	Nonsyn	Coding region
mtbs3581414_G	3581414	100	A	G	1904	Rv3204		ACA/GCA	34	T/A	Nonsyn	Coding region
mtbs3587446_A	3587446	94	G	A	771	Rv3210c		CTG/TTG	32	L/L	Syn	Coding region
mtbs3591063_C	3591063	430	T	C	1981	Rv3213c		AAG/GAG	144	K/E	Nonsyn	Coding region
mtbs3597249_G	3597249	286	C	G	768	Rv3220c		GGC/CGC	96	G/R	Nonsyn	Coding region
mtbs3597879_C	3597879	3597879	T	C	63
mtbs3600576_T	3600576	726	C	T	882	Rv3224		TGC/TGT	242	C/C	Syn	Coding region
mtbs3604821_C	3604821	96	G	C	2292	Rv3228		GCG/GCC	32	A/A	Syn	Coding region
mtbs3612813_C	3612813	304	T	C	811	Rv3236c		ACG/GCG	102	T/A	Nonsyn	Coding region
mtbs3614982_C	3614982	2622	T	C	1733	Rv3239c		CTA/CTG	874	L/L	Syn	Coding region
mtbs3621423_G	3621423	3621423	A	G	1191
mtbs3622441_C	3622441	651	A	C	2130	Rv3243c		GTT/GTG	217	V/V	Syn	Coding region
mtbs3625065_G	3625065	1549	T	G	1951	Rv3245c	mtrB	ATG/CTG	517	M/L	Nonsyn	Coding region
mtbs3626562_A	3626562	52	G	A	876	Rv3245c	mtrB	CCG/TCG	18	P/S	Nonsyn	Coding region
mtbs3628520_A	3628520	1128	G	A	767	Rv3248c	sahH	TCC/TCT	376	S/S	Syn	Coding region
mtbs3638093_A	3638093	617	G	A	1035	Rv3257c	pmmA	TCG/TTG	206	S/L	Nonsyn	Coding region
mtbs3643094_A	3643094	3643094	T	A	9
mtbs3643985_C	3643985	809	A	C	745	Rv3263		GAG/GCG	270	E/A	Nonsyn	Coding region
mtbs3653988_A	3653988	541	G	A	917	Rv3272		GTG/ATG	181	V/M	Nonsyn	Coding region
mtbs3657759_T	3657759	331	C	T	64	Rv3274c	fadE25	GGC/AGC	111	G/S	Nonsyn	Coding region
mtbs3664457_A	3664457	239	C	A	749	Rv3282		GCC/GAC	80	A/D	Nonsyn	Coding region
mtbs3665753_A	3665753	826	G	A	761	Rv3283	sseA	GAG/AAG	276	E/K	Nonsyn	Coding region
mtbs3670040_T	3670040	372	C	T	984	Rv3289c		GCG/GCA	124	A/A	Syn	Coding region
mtbs3674157_A	3674157	556	T	A	865	Rv3293	pcd	TGC/AGC	186	C/S	Nonsyn	Coding region
mtbs3675504_T	3675504	492	G	T	734	Rv3294c		ATC/ATA	164	I/I	Syn	Coding region
mtbs3678249_C	3678249	1475	A	C	834	Rv3296	lhr	AAG/ACG	492	K/T	Nonsyn	Coding region
mtbs3680932_A	3680932	4158	G	A	851	Rv3296	lhr	CCG/CCA	1386	P/P	Syn	Coding region
mtbs3681548_C	3681548	229	A	C	1032	Rv3297	nei	AGG/CGG	77	R/R	Syn	Coding region
mtbs3689523_T	3689523	1416	G	T	2047	Rv3303c	lpdA	TGC/TGA	472	C/Stop	Nonsyn	Coding region
mtbs3690016_G	3690016	923	A	G	1099	Rv3303c	lpdA	TTG/TCG	308	L/S	Nonsyn	Coding region
mtbs3693681_C	3693681	309	A	C	1074	Rv3306c	amiB1	GCT/GCG	103	A/A	Syn	Coding region
mtbs3704596_C	3704596	160	G	C	1843	Rv3317	sdhD	GTG/CTG	54	V/L	Nonsyn	Coding region
mtbs3704770_G	3704770	334	A	G	803	Rv3317	sdhD	ACC/GCC	112	T/A	Nonsyn	Coding region
mtbs3712372_G	3712372	624	A	G	362	Rv3327		CTA/CTG	208	L/L	Syn	Coding region
mtbs3714211_T	3714211	122	G	T	2014	Rv3328c	sigJ	CCG/CAG	41	P/Q	Nonsyn	Coding region
mtbs3714757_C	3714757	366	A	C	1812	Rv3329		CAA/CAC	122	Q/H	Nonsyn	Coding region
mtbs3718357_T	3718357	1268	C	T	2014	Rv3331	sugI	CCG/CTG	423	P/L	Nonsyn	Coding region
mtbs3721806_C	3721806	795	G	C	2028	Rv3335c		GGC/GGG	265	G/G	Syn	Coding region
mtbs3723401_A	3723401	231	G	A	64	Rv3336c	trpS	ATC/ATT	77	I/I	Syn	Coding region
mtbs3730466_G	3730466	6470	A	G	1186	Rv3343c	PPE54	ATC/ACC	2157	I/T	Nonsyn	Coding region
mtbs3730519_G	3730519	6417	C	G	1105	Rv3343c	PPE54	ACG/ACC	2139	T/T	Syn	Coding region
mtbs3730616_A	3730616	6320	G	A	869	Rv3343c	PPE54	GCC/GTC	2107	A/V	Nonsyn	Coding region
mtbs3730642_A	3730642	6294	G	A	1258	Rv3343c	PPE54	AAC/AAT	2098	N/N	Syn	Coding region
mtbs3730993_G	3730993	5943	A	G	774	Rv3343c	PPE54	GGT/GGC	1981	G/G	Syn	Coding region
mtbs3732247_G	3732247	4689	C	G	89	Rv3343c	PPE54	ACG/ACC	1563	T/T	Syn	Coding region
mtbs3732310_A	3732310	4626	G	A	169	Rv3343c	PPE54	AAC/AAT	1542	N/N	Syn	Coding region
mtbs3732344_A	3732344	4592	G	A	521	Rv3343c	PPE54	GCC/GTC	1531	A/V	Nonsyn	Coding region
mtbs3732517_G	3732517	4419	A	G	717	Rv3343c	PPE54	ATT/ATC	1473	I/I	Syn	Coding region
mtbs3732525_T	3732525	4411	A	T	751	Rv3343c	PPE54	TTC/ATC	1471	F/I	Nonsyn	Coding region
mtbs3732553_G	3732553	4383	A	G	835	Rv3343c	PPE54	ATT/ATC	1461	I/I	Syn	Coding region
mtbs3732624_G	3732624	4312	A	G	1000	Rv3343c	PPE54	TTG/CTG	1438	L/L	Syn	Coding region
mtbs3735802_G	3735802	1134	C	G	916	Rv3343c	PPE54	ACG/ACC	378	T/T	Syn	Coding region
mtbs3736024_G	3736024	912	A	G	1092	Rv3343c	PPE54	GGT/GGC	304	G/G	Syn	Coding region
mtbs3736628_G	3736628	308	T	G	2307	Rv3343c	PPE54	GAG/GCG	103	E/A	Nonsyn	Coding region
mtbs3741572_A	3741572	1203	G	A	822	Rv3345c	PE_PGRS50	GGC/GGT	401	G/G	Syn	Coding region
mtbs3743656_A	3743656	3743656	G	A	746
mtbs3743899_A	3743899	9286	G	A	838	Rv3347c	PPE55	CTG/TTG	3096	L/L	Syn	Coding region
mtbs3746409_G	3746409	6776	A	G	1727	Rv3347c	PPE55	CTG/CCG	2259	L/P	Nonsyn	Coding region
mtbs3750177_T	3750177	3008	A	T	1030	Rv3347c	PPE55	TTC/TAC	1003	F/Y	Nonsyn	Coding region
mtbs3750178_C	3750178	3007	A	C	1033	Rv3347c	PPE55	TTC/GTC	1003	F/V	Nonsyn	Coding region
mtbs3750185_G	3750185	3000	C	G	970	Rv3347c	PPE55	TCG/TCC	1000	S/S	Syn	Coding region
mtbs3750187_T	3750187	2998	A	T	967	Rv3347c	PPE55	TCG/ACG	1000	S/T	Nonsyn	Coding region
mtbs3750188_G	3750188	2997	C	G	981	Rv3347c	PPE55	ATG/ATC	999	M/I	Nonsyn	Coding region
mtbs3750193_A	3750193	2992	G	A	992	Rv3347c	PPE55	CTC/TTC	998	L/F	Nonsyn	Coding region
mtbs3750205_T	3750205	2980	C	T	1059	Rv3347c	PPE55	GAC/AAC	994	D/N	Nonsyn	Coding region
mtbs3750209_G	3750209	2976	A	G	1065	Rv3347c	PPE55	AAT/AAC	992	N/N	Syn	Coding region
mtbs3750210_G	3750210	2975	T	G	1062	Rv3347c	PPE55	AAT/ACT	992	N/T	Nonsyn	Coding region
mtbs3750407_C	3750407	2778	G	C	975	Rv3347c	PPE55	GGC/GGG	926	G/G	Syn	Coding region
mtbs3750417_T	3750417	2768	A	T	972	Rv3347c	PPE55	TTC/TAC	923	F/Y	Nonsyn	Coding region
mtbs3750421_C	3750421	2764	T	C	974	Rv3347c	PPE55	AGC/GGC	922	S/G	Nonsyn	Coding region
mtbs3752207_G	3752207	978	A	G	1588	Rv3347c	PPE55	ATT/ATC	326	I/I	Syn	Coding region
mtbs3753116_T	3753116	69	C	T	1513	Rv3347c	PPE55	CCG/CCA	23	P/P	Syn	Coding region
mtbs3753164_G	3753164	21	T	G	1627	Rv3347c	PPE55	CCA/CCC	7	P/P	Syn	Coding region
mtbs3754508_C	3754508	526	G	C	752	Rv3349c		CTC/GTC	176	L/V	Nonsyn	Coding region
mtbs3761169_T	3761169	5934	C	T	538	Rv3350c	PPE56	GCG/GCA	1978	A/A	Syn	Coding region
mtbs3761191_G	3761191	5912	A	G	780	Rv3350c	PPE56	GTC/GCC	1971	V/A	Nonsyn	Coding region
mtbs3762013_C	3762013	5090	A	C	767	Rv3350c	PPE56	CTC/CGC	1697	L/R	Nonsyn	Coding region
mtbs3775409_C	3775409	2093	T	C	853	Rv3365c		CAG/CGG	698	Q/R	Nonsyn	Coding region
mtbs3775441_C	3775441	2061	A	C	874	Rv3365c		AGT/AGG	687	S/R	Nonsyn	Coding region
mtbs3777389_A	3777389	113	G	A	64	Rv3365c		CCG/CTG	38	P/L	Nonsyn	Coding region
mtbs3778011_A	3778011	275	G	A	832	Rv3366	spoU	CGG/CAG	92	R/Q	Nonsyn	Coding region
mtbs3778012_T	3778012	276	G	T	834	Rv3366	spoU	CGG/CGT	92	R/R	Syn	Coding region
mtbs3778396_T	3778396	3778396	C	T	730
mtbs3798095_C	3798095	395	A	C	1894	Rv3383c	idsB	GTC/GGC	132	V/G	Nonsyn	Coding region
mtbs3798596_G	3798596	3798596	A	G	712
mtbs3804299_A	3804299	493	G	A	815	Rv3389c	htdY	CCC/TCC	165	P/S	Nonsyn	Coding region
mtbs3811672_T	3811672	3811672	G	T	719
mtbs3811675_G	3811675	3811675	A	G	718
mtbs3813266_T	3813266	813	C	T	719	Rv3396c	guaA	GTG/GTA	271	V/V	Syn	Coding region
mtbs3815477_T	3815477	630	G	T	1226	Rv3398c	idsA1	GCC/GCA	210	A/A	Syn	Coding region
mtbs3817117_A	3817117	989	C	A	2122	Rv3399		GCG/GAG	330	A/E	Nonsyn	Coding region
mtbs3821845_T	3821845	47	G	T	873	Rv3402c		GCA/GAA	16	A/E	Nonsyn	Coding region
mtbs3823159_T	3823159	705	A	T	1855	Rv3403c		GTT/GTA	235	V/V	Syn	Coding region
mtbs3826501_T	3826501	250	C	T	728	Rv3407	vapB47	CGC/TGC	84	R/C	Nonsyn	Coding region
mtbs3826684_T	3826684	137	C	T	1888	Rv3408	vapC47	TCG/TTG	46	S/L	Nonsyn	Coding region
mtbs3829528_A	3829528	383	G	A	9	Rv3410c	guaB3	GCT/GTT	128	A/V	Nonsyn	Coding region
mtbs3829770_C	3829770	141	T	C	1930	Rv3410c	guaB3	CCA/CCG	47	P/P	Syn	Coding region
mtbs3830349_T	3830349	1171	C	T	849	Rv3411c	guaB2	GCG/ACG	391	A/T	Nonsyn	Coding region
mtbs3830695_G	3830695	825	A	G	1060	Rv3411c	guaB2	GCT/GCC	275	A/A	Syn	Coding region
mtbs3834486_C	3834486	36	T	C	738	Rv3415c		CAA/CAG	12	Q/Q	Syn	Coding region
mtbs3838871_G	3838871	192	A	G	2070	Rv3420c	rimI	GCT/GCC	64	A/A	Syn	Coding region
mtbs3841790_G	3841790	287	A	G	631	Rv3424c		GTG/GCG	96	V/A	Nonsyn	Coding region
mtbs3842620_G	3842620	382	A	G	1378	Rv3425	PPE57	ACT/GCT	128	T/A	Nonsyn	Coding region
mtbs3842625_G	3842625	387	A	G	1390	Rv3425	PPE57	CCA/CCG	129	P/P	Syn	Coding region
mtbs3844992_A	3844992	979	T	A	1472			AGC/TGC	327	S/C	Nonsyn	Mobile element
mtbs3845695_T	3845695	276	C	T	1043			CGG/CGA	92	R/R	Syn	Mobile element
mtbs3846791_G	3846791	3846791	A	G	742
mtbs3846857_A	3846857	3846857	G	A	277
mtbs3846860_G	3846860	3846860	T	G	237
mtbs3846866_A	3846866	3846866	C	A	135
mtbs3846886_T	3846886	3846886	A	T	10
mtbs3846897_G	3846897	3846897	T	G	29
mtbs3847215_C	3847215	51	T	C	818	Rv3429	PPE59	GGT/GGC	17	G/G	Syn	Coding region
mtbs3847221_C	3847221	57	T	C	806	Rv3429	PPE59	GGT/GGC	19	G/G	Syn	Coding region
mtbs3847235_T	3847235	71	C	T	737	Rv3429	PPE59	TCT/TTT	24	S/F	Nonsyn	Coding region
mtbs3847237_T	3847237	73	G	T	733	Rv3429	PPE59	GCC/TCC	25	A/S	Nonsyn	Coding region
mtbs3847238_T	3847238	74	C	T	733	Rv3429	PPE59	GCC/GTC	25	A/V	Nonsyn	Coding region
mtbs3851887_C	3851887	1327	A	C	1132	Rv3433c		TCG/GCG	443	S/A	Nonsyn	Coding region
mtbs3851888_C	3851888	1326	T	C	1132	Rv3433c		GCA/GCG	442	A/A	Syn	Coding region
mtbs3859893_T	3859893	84	C	T	2083	Rv3440c		GAG/GAA	28	E/E	Syn	Coding region
mtbs3863138_A	3863138	127	G	A	788	Rv3445c	esxU	CCG/TCG	43	P/S	Nonsyn	Coding region
mtbs3863681_G	3863681	851	C	G	809	Rv3446c		CGG/CCG	284	R/P	Nonsyn	Coding region
mtbs3864995_C	3864995	3244	T	C	1812	Rv3447c	eccC4	AGC/GGC	1082	S/G	Nonsyn	Coding region
mtbs3865075_A	3865075	3164	G	A	9	Rv3447c	eccC4	ACC/ATC	1055	T/I	Nonsyn	Coding region
mtbs3870010_G	3870010	259	A	G	951	Rv3449	mycP4	ACC/GCC	87	T/A	Nonsyn	Coding region
mtbs3871246_C	3871246	1251	T	C	1187	Rv3450c	eccB4	GGA/GGG	417	G/G	Syn	Coding region
mtbs3877421_G	3877421	12	A	G	1866	Rv3456c	rplQ	CCT/CCC	4	P/P	Syn	Coding region
mtbs3877949_C	3877949	559	T	C	17	Rv3457c	rpoA	ACC/GCC	187	T/A	Nonsyn	Coding region
mtbs3883178_C	3883178	345	A	C	733	Rv3465	rmlC	GAA/GAC	115	E/D	Nonsyn	Coding region
mtbs3883796_T	3883796	247	G	T	839			GGC/TGC	83	G/C	Nonsyn	Repeat region
mtbs3883797_A	3883797	248	G	A	851			GGC/GAC	83	G/D	Nonsyn	Repeat region
mtbs3884906_G	3884906	943	A	G	1562	Rv3467		AAA/GAA	315	K/E	Nonsyn	Coding region
mtbs3885886_C	3885886	184	T	C	1895	Rv3468c		ATC/GTC	62	I/V	Nonsyn	Coding region
mtbs3892671_G	3892671	1050	A	G	1847	Rv3476c	kgtP	GTT/GTC	350	V/V	Syn	Coding region
mtbs3893480_A	3893480	241	G	A	1056	Rv3476c	kgtP	CTT/TTT	81	L/F	Nonsyn	Coding region
mtbs3894732_G	3894732	307	A	G	930	Rv3478	PPE60	AGG/GGG	103	R/G	Nonsyn	Coding region
mtbs3895585_T	3895585	1160	C	T	813	Rv3478	PPE60	CCC/CTC	387	P/L	Nonsyn	Coding region
mtbs3895727_A	3895727	3895727	C	A	940
mtbs3896340_G	3896340	521	T	G	1950	Rv3479		CTC/CGC	174	L/R	Nonsyn	Coding region
mtbs3898408_G	3898408	2589	A	G	1946	Rv3479		GCA/GCG	863	A/A	Syn	Coding region
mtbs3906311_A	3906311	697	G	A	752	Rv3487c	lipF	CGT/TGT	233	R/C	Nonsyn	Coding region
mtbs3908465_G	3908465	230	A	G	787	Rv3490	otsA	GAA/GGA	77	E/G	Nonsyn	Coding region
mtbs3909235_C	3909235	1000	G	C	1070	Rv3490	otsA	GTG/CTG	334	V/L	Nonsyn	Coding region
mtbs3916386_T	3916386	571	G	T	733	Rv3497c	mce4C	CGT/AGT	191	R/S	Nonsyn	Coding region
mtbs3934542_G	3934542	3538	T	G	1588	Rv3508	PE_PGRS54	TCT/GCT	1180	S/A	Nonsyn	Coding region
mtbs3934699_A	3934699	3695	G	A	1565	Rv3508	PE_PGRS54	AGC/AAC	1232	S/N	Nonsyn	Coding region
mtbs3934733_C	3934733	3729	G	C	1029	Rv3508	PE_PGRS54	GGG/GGC	1243	G/G	Syn	Coding region
mtbs3934734_A	3934734	3730	G	A	1017	Rv3508	PE_PGRS54	GCC/ACC	1244	A/T	Nonsyn	Coding region
mtbs3942481_G	3942481	758	C	G	1978	Rv3512	PE_PGRS56	GCG/GGG	253	A/G	Nonsyn	Coding region
mtbs3942640_C	3942640	917	T	C	2059	Rv3512	PE_PGRS56	ATT/ACT	306	I/T	Nonsyn	Coding region
mtbs3952308_A	3952308	163	C	A	754	Rv3515c	fadD19	GAC/TAC	55	D/Y	Nonsyn	Coding region
mtbs3952800_A	3952800	257	G	A	2021	Rv3516	echA19	GGC/GAC	86	G/D	Nonsyn	Coding region
mtbs3958403_G	3958403	883	A	G	1780	Rv3521		AAC/GAC	295	N/D	Nonsyn	Coding region
mtbs3959418_T	3959418	971	C	T	1920	Rv3522	ltp4	ACC/ATC	324	T/I	Nonsyn	Coding region
mtbs3959730_C	3959730	202	T	C	834	Rv3523	ltp3	TTC/CTC	68	F/L	Nonsyn	Coding region
mtbs3962187_A	3962187	138	G	A	779	Rv3525c		GAC/GAT	46	D/D	Syn	Coding region
mtbs3964518_A	3964518	675	G	A	753	Rv3528c		CCC/CCT	225	P/P	Syn	Coding region
mtbs3968006_C	3968006	939	A	C	744	Rv3531c		TTT/TTG	313	F/L	Nonsyn	Coding region
mtbs3970594_G	3970594	3970594	C	G	741
mtbs3976595_T	3976595	1227	G	T	749	Rv3537	kstD	AGG/AGT	409	R/S	Nonsyn	Coding region
mtbs3979990_G	3979990	670	C	G	796	Rv3540c	ltp2	GTG/CTG	224	V/L	Nonsyn	Coding region
mtbs3981983_A	3981983	1158	G	A	862	Rv3543c	fadE29	CCC/CCT	386	P/P	Syn	Coding region
mtbs3982279_C	3982279	862	T	C	64	Rv3543c	fadE29	ATC/GTC	288	I/V	Nonsyn	Coding region
mtbs3983039_A	3983039	102	T	A	9	Rv3543c	fadE29	AAA/AAT	34	K/N	Nonsyn	Coding region
mtbs3984321_A	3984321	1125	G	A	979	Rv3545c	cyp125	CAC/CAT	375	H/H	Syn	Coding region
mtbs3993058_A	3993058	374	G	A	834	Rv3554	fdxB	GGG/GAG	125	G/E	Nonsyn	Coding region
mtbs4001622_C	4001622	4001622	T	C	750
mtbs4005114_C	4005114	824	G	C	1100	Rv3563	fadE32	TGG/TCG	275	W/S	Nonsyn	Coding region
mtbs4005607_C	4005607	361	T	C	1951	Rv3564	fadE33	TTG/CTG	121	L/L	Syn	Coding region
mtbs4008747_G	4008747	536	A	G	1024	Rv3567c	hsaB	ATC/ACC	179	I/T	Nonsyn	Coding region
mtbs4022388_A	4022388	6	G	A	788	Rv3579c		CCC/CCT	2	P/P	Syn	Coding region
mtbs4024273_C	4024273	75	T	C	1926	Rv3581c	ispF	GTA/GTG	25	V/V	Syn	Coding region
mtbs4026899_A	4026899	456	G	A	2059	Rv3585	radA	CAG/CAA	152	Q/Q	Syn	Coding region
mtbs4028752_G	4028752	862	A	G	1001	Rv3586		ACG/GCG	288	T/A	Nonsyn	Coding region
mtbs4032218_A	4032218	941	G	A	907	Rv3590c	PE_PGRS58	GCT/GTT	314	A/V	Nonsyn	Coding region
mtbs4032625_T	4032625	534	G	T	873	Rv3590c	PE_PGRS58	GGC/GGA	178	G/G	Syn	Coding region
mtbs4033577_G	4033577	466	A	G	770	Rv3591c		TTC/CTC	156	F/L	Nonsyn	Coding region
mtbs4034827_T	4034827	476	C	T	2096	Rv3593	lpqF	GCG/GTG	159	A/V	Nonsyn	Coding region
mtbs4036092_C	4036092	236	T	C	9	Rv3594		GTA/GCA	79	V/A	Nonsyn	Coding region
mtbs4037283_G	4037283	768	T	G	2096	Rv3595c	PE_PGRS59	GGA/GGC	256	G/G	Syn	Coding region
mtbs4041581_T	4041581	1360	C	T	756	Rv3598c	lysS	GCG/ACG	454	A/T	Nonsyn	Coding region
mtbs4046007_T	4046007	112	C	T	720	Rv3603c		GTG/ATG	38	V/M	Nonsyn	Coding region
mtbs4050811_A	4050811	2073	G	A	848	Rv3610c	ftsH	TAC/TAT	691	Y/Y	Syn	Coding region
mtbs4053050_G	4053050	56	A	G	484			GTT/GCT	19	V/A	Nonsyn	Repeat region
mtbs4055801_A	4055801	575	G	A	1855	Rv3616c	espA	ACC/ATC	192	T/I	Nonsyn	Coding region
mtbs4056416_A	4056416	4056416	C	A	899
mtbs4056693_T	4056693	4056693	G	T	722
mtbs4059143_C	4059143	446	A	C	850	Rv3618		GAG/GCG	149	E/A	Nonsyn	Coding region
mtbs4059904_G	4059904	4059904	A	G	1933
mtbs4060100_A	4060100	169	G	A	1274	Rv3619c	esxV	CTG/TTG	57	L/L	Syn	Coding region
mtbs4060201_A	4060201	68	G	A	1259	Rv3619c	esxV	TCG/TTG	23	S/L	Nonsyn	Coding region
mtbs4060210_A	4060210	59	T	A	1258	Rv3619c	esxV	CAG/CTG	20	Q/L	Nonsyn	Coding region
mtbs4060230_A	4060230	39	G	A	1233	Rv3619c	esxV	CAC/CAT	13	H/H	Syn	Coding region
mtbs4060588_C	4060588	4	T	C	779	Rv3620c	esxW	ACC/GCC	2	T/A	Nonsyn	Coding region
mtbs4069292_A	4069292	118	G	A	1901	Rv3630		GCC/ACC	40	A/T	Nonsyn	Coding region
mtbs4089058_C	4089058	278	T	C	1045	Rv3649		CTC/CCC	93	L/P	Nonsyn	Coding region
mtbs4095295_C	4095295	6	T	C	1026	Rv3655c		GAA/GAG	2	E/E	Syn	Coding region
mtbs4100975_C	4100975	4100975	T	C	1978
mtbs4107074_C	4107074	11	T	C	1010	Rv3666c	dppA	CAG/CGG	4	Q/R	Nonsyn	Coding region
mtbs4111303_C	4111303	477	G	C	1899	Rv3669		GTG/GTC	159	V/V	Syn	Coding region
mtbs4112429_C	4112429	1087	T	C	1005	Rv3671c		ATC/GTC	363	I/V	Nonsyn	Coding region
mtbs4115890_C	4115890	5	G	C	753	Rv3674c	nth	CCC/CGC	2	P/R	Nonsyn	Coding region
mtbs4116610_A	4116610	133	G	A	765	Rv3676	crp	GAT/AAT	45	D/N	Nonsyn	Coding region
mtbs4120390_C	4120390	596	G	C	746	Rv3680		GGA/GCA	199	G/A	Nonsyn	Coding region
mtbs4122287_T	4122287	372	G	T	887	Rv3682	ponA2	GCG/GCT	124	A/A	Syn	Coding region
mtbs4123770_A	4123770	1855	G	A	832	Rv3682	ponA2	GCG/ACG	619	A/T	Nonsyn	Coding region
mtbs4133316_T	4133316	799	A	T	892	Rv3691		ACG/TCG	267	T/S	Nonsyn	Coding region
mtbs4137829_T	4137829	624	C	T	809	Rv3695		GCC/GCT	208	A/A	Syn	Coding region
mtbs4145737_G	4145737	1155	A	G	1060	Rv3703c		TAT/TAC	385	Y/Y	Syn	Coding region
mtbs4151855_G	4151855	363	A	G	1301	Rv3708c	asd	CCT/CCC	121	P/P	Syn	Coding region
mtbs4156099_A	4156099	631	C	A	2046	Rv3711c	dnaQ	GTG/TTG	211	V/L	Nonsyn	Coding region
mtbs4156503_T	4156503	227	C	T	1053	Rv3711c	dnaQ	GGC/GAC	76	G/D	Nonsyn	Coding region
mtbs4158493_T	4158493	267	C	T	781	Rv3713	cobQ2	ATC/ATT	89	I/I	Syn	Coding region
mtbs4159195_C	4159195	627	T	C	1477	Rv3714c		CCA/CCG	209	P/P	Syn	Coding region
mtbs4160371_A	4160371	130	C	A	753	Rv3715c	recR	GGT/TGT	44	G/C	Nonsyn	Coding region
mtbs4162339_G	4162339	34	A	G	1888	Rv3719		ACG/GCG	12	T/A	Nonsyn	Coding region
mtbs4166441_A	4166441	291	G	A	913	Rv3721c	dnaZX	CAC/CAT	97	H/H	Syn	Coding region
mtbs4167656_G	4167656	473	A	G	759	Rv3722c		ATG/ACG	158	M/T	Nonsyn	Coding region
mtbs4169852_T	4169852	247	G	T	865	Rv3724B	cut5b	GCG/TCG	83	A/S	Nonsyn	Coding region
mtbs4170739_C	4170739	526	G	C	978	Rv3725		GTC/CTC	176	V/L	Nonsyn	Coding region
mtbs4174131_C	4174131	1177	G	C	745	Rv3727		GGA/CGA	393	G/R	Nonsyn	Coding region
mtbs4179089_T	4179089	805	C	T	1000	Rv3729		CCG/TCG	269	P/S	Nonsyn	Coding region
mtbs4179832_C	4179832	1548	G	C	758	Rv3729		CAG/CAC	516	Q/H	Nonsyn	Coding region
mtbs4182387_C	4182387	630	G	C	773	Rv3731	ligC	GTG/GTC	210	V/V	Syn	Coding region
mtbs4182695_A	4182695	938	G	A	1918	Rv3731	ligC	CGC/CAC	313	R/H	Nonsyn	Coding region
mtbs4186678_A	4186678	45	G	A	779	Rv3736		CTG/CTA	15	L/L	Syn	Coding region
mtbs4187485_C	4187485	852	T	C	1818	Rv3736		GCT/GCC	284	A/A	Syn	Coding region
mtbs4187817_G	4187817	119	A	G	2106	Rv3737		GAT/GGT	40	D/G	Nonsyn	Coding region
mtbs4189210_T	4189210	1512	G	T	857	Rv3737		CCG/CCT	504	P/P	Syn	Coding region
mtbs4194501_A	4194501	873	G	A	848	Rv3743c	ctpJ	TTC/TTT	291	F/F	Syn	Coding region
mtbs4204168_C	4204168	250	T	C	766	Rv3758c	proV	AAC/GAC	84	N/D	Nonsyn	Coding region
mtbs4204441_G	4204441	933	A	G	1835	Rv3759c	proX	CAT/CAC	311	H/H	Syn	Coding region
mtbs4205120_G	4205120	254	A	G	1245	Rv3759c	proX	CTG/CCG	85	L/P	Nonsyn	Coding region
mtbs4205325_G	4205325	49	A	G	780	Rv3759c	proX	TGG/CGG	17	W/R	Nonsyn	Coding region
mtbs4210274_G	4210274	736	A	G	1945	Rv3764c	tcrY	TGT/CGT	246	C/R	Nonsyn	Coding region
mtbs4214988_A	4214988	4214988	G	A	713
mtbs4215433_T	4215433	343	C	T	692	Rv3770c		GCG/ACG	115	A/T	Nonsyn	Coding region
mtbs4215484_C	4215484	292	G	C	977	Rv3770c		CCC/GCC	98	P/A	Nonsyn	Coding region
mtbs4217557_G	4217557	424	A	G	966	Rv3772	hisC2	ACG/GCG	142	T/A	Nonsyn	Coding region
mtbs4218416_A	4218416	410	C	A	756	Rv3773c		GGG/GTG	137	G/V	Nonsyn	Coding region
mtbs4218941_A	4218941	93	G	A	745	Rv3774	echA21	GGG/GGA	31	G/G	Syn	Coding region
mtbs4221423_T	4221423	335	C	T	800	Rv3776		TCG/TTG	112	S/L	Nonsyn	Coding region
mtbs4221490_G	4221490	402	C	G	2030	Rv3776		CTC/CTG	134	L/L	Syn	Coding region
mtbs4222073_G	4222073	985	A	G	2230	Rv3776		ATG/GTG	329	M/V	Nonsyn	Coding region
mtbs4222882_G	4222882	189	A	G	1979	Rv3777		CTA/CTG	63	L/L	Syn	Coding region
mtbs4223172_C	4223172	479	T	C	1523	Rv3777		GTC/GCC	160	V/A	Nonsyn	Coding region
mtbs4229167_C	4229167	821	T	C	856	Rv3782	glfT1	GTG/GCG	274	V/A	Nonsyn	Coding region
mtbs4234960_C	4234960	181	A	C	774	Rv3788		ATC/CTC	61	I/L	Nonsyn	Coding region
mtbs4236237_T	4236237	459	C	T	750	Rv3790	dprE1	ACC/ACT	153	T/T	Syn	Coding region
mtbs4238675_T	4238675	744	C	T	537	Rv3792	aftA	GGC/GGT	248	G/G	Syn	Coding region
mtbs4242643_T	4242643	2781	C	T	2135	Rv3793	embC	CGC/CGT	927	R/R	Syn	Coding region
mtbs4243460_T	4243460	228	C	T	780	Rv3794	embA	TGC/TGT	76	C/C	Syn	Coding region
mtbs4247429_G	4247429	916	A	G	151	Rv3795	embB	ATG/GTG	306	M/V	Nonsyn	Coding region
mtbs4251297_C	4251297	213	G	C	980	Rv3797	fadE35	GGG/GGC	71	G/G	Syn	Coding region
mtbs4252066_C	4252066	982	T	C	773	Rv3797	fadE35	TCG/CCG	328	S/P	Nonsyn	Coding region
mtbs4254006_T	4254006	71	G	T	596			TGC/TTC	24	C/F	Nonsyn	Sequence-Tagged Site
mtbs4254039_C	4254039	104	T	C	579			GTA/GCA	35	V/A	Nonsyn	Sequence-Tagged Site
mtbs4254290_G	4254290	355	T	G	933			TGC/GGC	119	C/G	Nonsyn	Sequence-Tagged Site
mtbs4254431_A	4254431	496	G	A	771			GTC/ATC	166	V/I	Nonsyn	Sequence-Tagged Site
mtbs4255922_G	4255922	27	A	G	1913	Rv3799c	accD4	CAT/CAC	9	H/H	Syn	Coding region
mtbs4256210_T	4256210	4937	G	T	803	Rv3800c	pks13	GCC/GAC	1646	A/D	Nonsyn	Coding region
mtbs4257220_G	4257220	3927	A	G	1782	Rv3800c	pks13	CGT/CGC	1309	R/R	Syn	Coding region
mtbs4258106_A	4258106	3041	G	A	739	Rv3800c	pks13	ACG/ATG	1014	T/M	Nonsyn	Coding region
mtbs4262388_T	4262388	679	C	T	860	Rv3801c	fadD32	GGC/AGC	227	G/S	Nonsyn	Coding region
mtbs4267647_C	4267647	1190	T	C	867	Rv3805c	aftB	GAC/GGC	397	D/G	Nonsyn	Coding region
mtbs4274541_A	4274541	803	C	A	533	Rv3810	pirG	CCC/CAC	268	P/H	Nonsyn	Coding region
mtbs4280254_T	4280254	535	G	T	155	Rv3815c		CTG/ATG	179	L/M	Nonsyn	Coding region
mtbs4280708_A	4280708	81	G	A	782	Rv3815c		GTC/GTT	27	V/V	Syn	Coding region
mtbs4284429_A	4284429	1397	G	A	739	Rv3820c	papA2	CCA/CTA	466	P/L	Nonsyn	Coding region
mtbs4287164_G	4287164	444	A	G	959	Rv3822		GGA/GGG	148	G/G	Syn	Coding region
mtbs4290135_T	4290135	1395	C	T	741	Rv3823c	mmpL8	CTG/CTA	465	L/L	Syn	Coding region
mtbs4296015_A	4296015	3591	G	A	1220	Rv3825c	pks2	GAC/GAT	1197	D/D	Syn	Coding region
mtbs4301075_C	4301075	1264	G	C	763	Rv3826	fadD23	GAA/CAA	422	E/Q	Nonsyn	Coding region
mtbs4302036_C	4302036	754	T	C	1983	Rv3827c		ACG/GCG	252	T/A	Nonsyn	Coding region
mtbs4306155_T	4306155	399	C	T	1939	Rv3831		AGC/AGT	133	S/S	Syn	Coding region
mtbs4307179_A	4307179	313	G	A	1824	Rv3833		GTC/ATC	105	V/I	Nonsyn	Coding region
mtbs4308395_A	4308395	520	G	A	788	Rv3834c	serS	CTG/TTG	174	L/L	Syn	Coding region
mtbs4309927_G	4309927	881	T	G	796	Rv3835		CTC/CGC	294	L/R	Nonsyn	Coding region
mtbs4311664_T	4311664	44	C	T	764	Rv3837c		GGC/GAC	15	G/D	Nonsyn	Coding region
mtbs4313128_T	4313128	364	C	T	1024	Rv3839		CCC/TCC	122	P/S	Nonsyn	Coding region
mtbs4314645_G	4314645	468	A	G	1282	Rv3841	bfrB	CTA/CTG	156	L/L	Syn	Coding region
mtbs4314800_A	4314800	3	G	A	907	RVnc0044	ncrMT3949	GTG/GTA	1	V/V	Syn	Non-coding RNA
mtbs4319985_C	4319985	4319985	G	C	739
mtbs4329782_A	4329782	4329782	G	A	922
mtbs4338732_A	4338732	4338732	G	A	1656
mtbs4340028_C	4340028	4340028	G	C	753
mtbs4350305_A	4350305	1479	G	A	777	Rv3871	eccCb1	CCG/CCA	493	P/P	Syn	Coding region
mtbs4351039_T	4351039	295	G	T	1887	Rv3872	PE35	GAA/TAA	99	E/Stop	Nonsyn	Coding region
mtbs4356110_C	4356110	1104	G	C	1877	Rv3877	eccD1	CTG/CTC	368	L/L	Syn	Coding region
mtbs4357597_G	4357597	2186	C	G	1397	Rv3879c	espK	TGC/TCC	729	C/S	Nonsyn	Coding region
mtbs4357804_G	4357804	1979	T	G	777	Rv3879c	espK	GAG/GCG	660	E/A	Nonsyn	Coding region
mtbs4359653_T	4359653	130	C	T	763	Rv3879c	espK	GAT/AAT	44	D/N	Nonsyn	Coding region
mtbs4359828_A	4359828	4359828	G	A	732
mtbs4362568_G	4362568	853	T	G	823	Rv3882c	eccE1	AGA/CGA	285	R/R	Syn	Coding region
mtbs4366195_C	4366195	644	T	C	1455	Rv3884c	eccA2	GAG/GGG	215	E/G	Nonsyn	Coding region
mtbs4366272_C	4366272	567	G	C	2093	Rv3884c	eccA2	GCC/GCG	189	A/A	Syn	Coding region
mtbs4368084_C	4368084	438	G	C	841	Rv3885c	eccE2	GTC/GTG	146	V/V	Syn	Coding region
mtbs4372353_C	4372353	354	G	C	1031	Rv3888c		CGC/CGG	118	R/R	Syn	Coding region
mtbs4375628_T	4375628	56	G	T	1878	Rv3892c	PPE69	ACG/AAG	19	T/K	Nonsyn	Coding region
mtbs4378504_C	4378504	1949	T	C	747	Rv3894c	eccC2	GAT/GGT	650	D/G	Nonsyn	Coding region
mtbs4379680_G	4379680	773	C	G	1965	Rv3894c	eccC2	CGC/CCC	258	R/P	Nonsyn	Coding region
mtbs4382054_C	4382054	798	T	C	2088	Rv3896c		GCA/GCG	266	A/A	Syn	Coding region
mtbs4382275_T	4382275	577	G	T	2041	Rv3896c		CAA/AAA	193	Q/K	Nonsyn	Coding region
mtbs4383655_G	4383655	331	A	G	1034	Rv3898c		TAG/CAG	111	Stop/Q	Nonsyn	Coding region
mtbs4384007_G	4384007	4384007	C	G	934
mtbs4386228_C	4386228	81	T	C	1361	Rv3900c		CTA/CTG	27	L/L	Syn	Coding region
mtbs4393178_G	4393178	4393178	A	G	1287
mtbs4393590_G	4393590	142	C	G	790	Rv3908	mutT4	CGG/GGG	48	R/G	Nonsyn	Coding region
mtbs4397736_T	4397736	1140	C	T	877	Rv3910		ATC/ATT	380	I/I	Syn	Coding region
mtbs4407588_C	4407588	615	T	C	1009	Rv3919c	gid	GCA/GCG	205	A/A	Syn	Coding region
mtbs4407927_G	4407927	276	T	G	772	Rv3919c	gid	GAA/GAC	92	E/D	Nonsyn	Coding region
mtbs4408923_T	4408923	4408923	C	T	962

## Sheet: 1405_indel
Supplementary Material
Genomic analysis of multidrug resistant Mycobacterium tuberculosis strains from patients in Kazakhstan
Supplementary file S5 – List of genetic variants (SNPs and Indels) filtered by GMTV database.
4_1405.vcf
INDEL ID	Position in genome	Position in gene	Ref	Alt	# of samples	Locus tag	Gene	Frameshift	Genome Region
	104807	408	A	AG	0	Rv0095c		NO	Coding region
	104808	407	A	ATC	0	Rv0095c		NO	Coding region
	104811	404	CTT	C	0	Rv0095c		NO	Coding region
	328589	1119	TG	T	0	Rv0272c		NO	Coding region
	424011	372	C	CGCCGGTGAGCGAGCGCGCGTAGCGGGGGAGCGAACGGCGCAGTTGGCACCAGCCGGTGAGCGAGCGCGCGTAGCGGGGGAGCGAACGGCGCAGTTGGCACCA	0	Rv0353	hspR	YES	Coding region
	623674	881	TG	T	0	Rv0532	PE_PGRS6	NO	Coding region
	672735	3181	C	CCGG	0	Rv0578c	PE_PGRS7	YES	Coding region
	802427	294	C	CCGGCCTAGCCCGGCGACGATGCAGAGCGAAGCGATGAGGAGGAGCAGGGCAATGCGGCCTAGCCCGGCGACGATGCAGAGCGAAGCGATGAGGAGGAGCAGGGCAATG	0	Rv0703	rplW	YES	Coding region
	820620	856	T	TG	0	Rv0728c	serA2	NO	Coding region
	1083589	161	CA	C	0	Rv0972c	fadE12	NO	Coding region
	1094010	346	AATG	A	0	Rv0978c	PE_PGRS17	YES	Coding region
	1094014	342	G	GCTT	0	Rv0978c	PE_PGRS17	YES	Coding region
	1094033	323	A	AG	0	Rv0978c	PE_PGRS17	NO	Coding region
	1094037	319	G	GC	0	Rv0978c	PE_PGRS17	NO	Coding region
	1094039	317	TGC	T	0	Rv0978c	PE_PGRS17	NO	Coding region
	1094048	308	C	CACCCCCAACAGGGCCT	0	Rv0978c	PE_PGRS17	NO	Coding region
	1094050	306	CA	C	0	Rv0978c	PE_PGRS17	NO	Coding region
	1451778	1081	AGTGGCGATCGCAAGCGCGGCGGAGCCGGGTGCGGCGGGTCGGCACGGTTTGGATTGGGTGGCGATCGCAAGCGCGGCGGAGCCGGGTGCGGCGGGTCGGCACGGTTTGGATTGG	A	0	Rv1295	thrC	YES	Coding region
	1468612	893	GC	G	0	Rv1313c		NO	Coding region
	1572469	1388	CT	C	0	Rv1396c	PE_PGRS25	NO	Coding region
	1572473	1384	C	CT	0	Rv1396c	PE_PGRS25	NO	Coding region
	1631184	3443	GC	G	0	Rv1450c	PE_PGRS27	NO	Coding region
	1655829	892	GC	G	0	Rv1468c	PE_PGRS29	NO	Coding region
	2074435	492	TAGCGCGGCGACGATGCGCGCCGGGACGGCGGGCTGAGGAGGCGCGCGATAAGGCCG	T	0	Rv1829		NO	Coding region
	2165503	1808	T	TGCCGGAAGTGAGTAGCCATCCGGGAACACCGTAAACGGGCCTAACCCTCCGCCCACATCAATACCCAACGGGATA	0	Rv1917c	PPE34	YES	Coding region
	2423538	1300	TC	T	0	Rv2162c	PE_PGRS38	NO	Coding region
	2461325	1647	TAGCCCGGCGACGACCCGGGTCGGCACGACCCGGGAAGGAACCGGGCAAATCAAGCAC	T	0	Rv2196	qcrB	YES	Coding region
	2805069	1167	GC	G	0	Rv2490c	PE_PGRS43	NO	Coding region
	2960651	1790	G	GC	0	Rv2634c	PE_PGRS46	NO	Coding region
	3518170	1424	CG	C	0	Rv3151	nuoG	NO	Coding region
	3645710	267	T	TC	0	Rv3264c	manB	NO	Coding region
	3663727	38	ACCTGTGAGTCGAGTGAGCGGAACGAACGAAGTGAGTGACGGGAACGAGACGAACAATCCGGCAGAAGTGAGTGACGGGAACGAGACGAACAATCCGGCAGAAGTGAGTGACGGGAACGAGACGAACAATCCGGCC	A	0	Rv3281	accE5	YES	Coding region
	3699806	524	C	CG	0	Rv3312c		NO	Coding region
	4031734	1424	GC	G	0	Rv3590c	PE_PGRS58	NO	Coding region
mtbi0024698-2	24698	746	GCCGCGTTGCTCGGGGTAA	G	1	Rv0020c	fhaA	YES	Coding region
mtbi0028366-2	28366	4	AT	A	1	Rv0024		NO	Coding region
mtbi0049690-2	49690	249	GCC	G	1	Rv0045c		NO	Coding region
mtbi0055546-26	55546	1883	G	GCCT	1	Rv0050	ponA1	YES	Coding region
mtbi0055553-11	55553	1890	C	CCGCCGT	1	Rv0050	ponA1	YES	Coding region
mtbi0068337-3	68337	1414	T	TC	1	Rv0063		NO	Coding region
mtbi0071584-17	71584	71584	C	CCGAGCGCTGTTCTGGCGCTAATCTGACGCTAGAATAG	1			NO
mtbi0099162-2	99162	682	TCGGTGTGCG	T	1	Rv0090		YES	Coding region
mtbi0103743-4	103743	1472	GAGGAAT	G	1			YES	Repeat region
mtbi0103752_6	103752	912	T	TAGCAGCTTC	46	Rv0094c		YES	Coding region
mtbi0104939-2	104939	276	G	GACC	1	Rv0095c		YES	Coding region
mtbi0104940-1	104940	275	CTGG	C	1	Rv0095c		YES	Coding region
mtbi0125830-2	125830	4711	G	GA	1	Rv0107c	ctpI	NO	Coding region
mtbi0131174-2	131174	131174	T	TG	1			NO
mtbi0162151-2	162151	380	GT	G	1	Rv0134	ephF	NO	Coding region
mtbi0194305_1	194305	511	C	CGG	905	Rv0165c	mce1R	NO	Coding region
mtbi0230576-2	230576	230576	G	GT	1			NO
mtbi0234496_1	234496	2266	C	CGT	2061	Rv0197		NO	Coding region
mtbi0336557-1	336557	336557	C	CT	1			NO
mtbi0336562-1	336562	2511	A	ATGG	1	Rv0279c	PE_PGRS4	YES	Coding region
mtbi0336680-6	336680	2393	GGGGA	G	1	Rv0279c	PE_PGRS4	NO	Coding region
mtbi0336686-1	336686	2387	CGA	C	1	Rv0279c	PE_PGRS4	NO	Coding region
mtbi0336690-1	336690	2383	CT	C	1	Rv0279c	PE_PGRS4	NO	Coding region
mtbi0336694-1	336694	2379	A	ACACCGCC	1	Rv0279c	PE_PGRS4	NO	Coding region
mtbi0338788-2	338788	285	AGGTG	A	1	Rv0279c	PE_PGRS4	NO	Coding region
mtbi0368087-3	368087	4677	AGCTGCCGGTGTTGAT	A	1	Rv0304c	PPE5	YES	Coding region
mtbi0373282-3	373282	2429	TA	T	1	Rv0305c	PPE6	NO	Coding region
mtbi0424320-3	424320	374	T	TC	1	Rv0354c	PPE7	NO	Coding region
mtbi0427310-2	427310	7369	TTGCCGAGGTTTGCAC	T	1	Rv0355c	PPE8	YES	Coding region
mtbi0467497-2	467497	504	C	CG	1	Rv0388c	PPE9	NO	Coding region
mtbi0467508-2	467508	493	C	CG	1	Rv0388c	PPE9	NO	Coding region
mtbi0472711-8	472711	472711	T	TTTGTGGGCC	1			YES
mtbi0485810-3	485810	79	CA	C	1	Rv0405	pks6	NO	Coding region
mtbi0507028-2	507028	507028	GC	G	1			NO
mtbi0580773-4	580773	41	GGGGGCACCACCCGCTTGCGGGGGA	G	1			YES	Repeat region
mtbi0623558-3	623558	765	AACGGCGGCG	A	1	Rv0532	PE_PGRS6	YES	Coding region
mtbi0672512-2	672512	3404	ACCGGTGCCG	A	1	Rv0578c	PE_PGRS7	YES	Coding region
mtbi0688792-2	688792	760	T	TG	1	Rv0590	mce2B	NO	Coding region
mtbi0830868-2	830868	13	G	GGC	1	Rv0739		NO	Coding region
mtbi0854252-10	854252	854252	GCC	G	1			NO
mtbi0874835-4	874835	103	C	CCG	1	Rv0782	ptrBb	NO	Coding region
mtbi0888992_2	888992	888992	AACCTCAACACCCCCTCAAGTGAAGGAGG	A	20			NO
mtbi0916685-2	916685	961	CG	C	1	Rv0823c		NO	Coding region
mtbi0916688-5	916688	958	AGC	A	1	Rv0823c		NO	Coding region
mtbi0968426-2	968426	1818	A	AGCCGGGTTG	1	Rv0872c	PE_PGRS15	YES	Coding region
mtbi0987585-4	987585	352	A	AG	1	Rv0888		NO	Coding region
mtbi1010204-3	1010204	68	C	CG	1	Rv0907		NO	Coding region
mtbi1034208-2	1034208	423	CGCT	C	1	Rv0927c		YES	Coding region
mtbi1090188-2	1090188	1090188	A	AG	1			NO
mtbi1093947_1	1093947	410	A	AAGAT	217	Rv0978c	PE_PGRS17	NO	Coding region
mtbi1093957-1	1093957	399	CGTTA	C	1	Rv0978c	PE_PGRS17	NO	Coding region
mtbi1093978-1	1093978	378	T	TG	1	Rv0978c	PE_PGRS17	NO	Coding region
mtbi1093985-1	1093985	371	GA	G	1	Rv0978c	PE_PGRS17	NO	Coding region
mtbi1094057_1	1094057	300	CACG	C	1	Rv0978c	PE_PGRS17	YES	Coding region
mtbi1165521-4	1165521	28	T	TA	1			NO	Mobile element
mtbi1168009-3	1168009	336	GC	G	1	Rv1045		NO	Coding region
mtbi1168715-2	1168715	513	C	CT	1	Rv1046c		NO	Coding region
mtbi1215104-3	1215104	335	AT	A	1	Rv1089	PE10	NO	Coding region
mtbi1252053-4	1252053	432	AG	A	1			NO	Repeat region
mtbi1273250_1	1273250	828	G	GA	857	Rv1145	mmpL13a	NO	Coding region
mtbi1276859-1	1276859	889	A	AGT	1	Rv1148c		NO	Coding region
mtbi1276865-1	1276865	883	GCA	G	1	Rv1148c		NO	Coding region
mtbi1313337_1	1313337	1313337	A	AG	1891			NO
mtbi1365837-4	1365837	1365837	C	CGG	1			NO
mtbi1368322-3	1368322	399	C	CG	1	Rv1225c		NO	Coding region
mtbi1406760_1	1406760	581	T	TG	700	Rv1258c		NO	Coding region
mtbi1413129-2	1413129	95	CG	C	1	RVnc0013	mcr11	NO	Non-coding RNA
mtbi1418863-4	1418863	90	C	CGGGAGCCA	1	Rv1269c		NO	Coding region
mtbi1443428-3	1443428	1443428	G	GGGTTAGATTGCCCGGCTCCTCAACCCGCCGTTTCGGCGTGCATCGTCGCCGGGCTA	1			NO
mtbi1529133_1	1529133	2522	CCGA	C	621	Rv1358		YES	Coding region
mtbi1612624-2	1612624	17	T	TATCGGTACCGGTGCGCCAGGG	1			YES	Repeat region
mtbi1619100-2	1619100	584	ACCGGCTCCACCGGCGCCG	A	1	Rv1441c	PE_PGRS26	YES	Coding region
mtbi1625332-3	1625332	33	C	CGGT	1	Rv1446c	opcA	YES	Coding region
mtbi1634536-2	1634536	254	GC	G	1			NO	Repeat region
mtbi1634540-2	1634540	250	C	CT	1			NO	Repeat region
mtbi1636172-3	1636172	2057	T	TCCG	1	Rv1452c	PE_PGRS28	YES	Coding region
mtbi1637788_1	1637788	442	CCCCACCGTT	C	40	Rv1452c	PE_PGRS28	YES	Coding region
mtbi1644248-5	1644248	12	G	GGGCGCGGTTCACGAGCGCCGCTCCTCCTCATCGCTTCGCTCTGCATCGTCGTC	1	Rv1458c		NO	Coding region
mtbi1696671-3	1696671	1696671	CA	C	1			NO
mtbi1753519-2	1753519	9	G	GC	1	Rv1549	fadD11.1	NO	Coding region
mtbi1756358-2	1756358	913	CG	C	1	Rv1551	plsB1	NO	Coding region
mtbi1864924-9	1864924	458	A	ACCGCCGGCCCCGCCGTCGGGT	1	Rv1651c	PE_PGRS30	YES	Coding region
mtbi1894300-9	1894300	1042	G	GGTCTTGCCGC	1	Rv1668c		NO	Coding region
mtbi1907459-4	1907459	1907459	C	CAGTCGGGTGACGATGCGGGCCGGTGTGGTCCGAGGAGGAGCCCGACAATTTAAGCT	1			NO
mtbi1955760-2	1955760	1485	CGAA	C	1	Rv1730c		YES	Coding region
mtbi1955913-11	1955913	1332	CCCGGAAG	C	1	Rv1730c		NO	Coding region
mtbi1955921-1	1955921	1324	TCGATGACCGTTG	T	1	Rv1730c		YES	Coding region
mtbi2009290-2	2009290	118	GC	G	1	Rv1775		NO	Coding region
mtbi2061433-5	2061433	1241	T	TCCGCCGGCG	1	Rv1818c	PE_PGRS33	YES	Coding region
mtbi2094911-2	2094911	277	ACAGCGT	A	1	Rv1844c	gnd1	YES	Coding region
mtbi2109523-2	2109523	2109523	C	CG	1			NO
mtbi2133468-10	2133468	224	T	TTCGCATGCCGTCACC	1	Rv1883c		YES	Coding region
mtbi2137521-6	2137521	558	A	ACTCCGATCAC	1	Rv1888c		NO	Coding region
mtbi2146065-12	2146065	180	C	CGGCGGTCGCGGCGGGGCGGGCGGTAGAGGCGGCGACGGCGGGCAA	1	Rv1899c	lppD	YES	Coding region
mtbi2153725-2	2153725	157	CTCATCCCCGTCTCG	C	1	Rv1907c		NO	Coding region
mtbi2207591_1	2207591	2207591	T	TC	1719			NO
mtbi2241031-3	2241031	872	AG	A	1	Rv1997	ctpF	NO	Coding region
mtbi2266504-1	2266504	216	T	TA	1	Rv2020c		NO	Coding region
mtbi2266511-1	2266511	209	GT	G	1	Rv2020c		NO	Coding region
mtbi2266613-2	2266613	107	G	GC	1	Rv2020c		NO	Coding region
mtbi2273733_1	2273733	776	TC	T	656	Rv2027c	dosT	NO	Coding region
mtbi2342649-8	2342649	841	A	AGGCGTACACAC	1	Rv2084		NO	Coding region
mtbi2352065-10	2352065	2352065	C	CCTCGCCTGGGCTGGCGAGCAGACGCAAAATCCCCCGCACGCCCGGCGTGTCGGGGGATTTTGCGTCTG	1			NO
mtbi2357268-4	2357268	765	TGCC	T	1	Rv2098c	PE_PGRS36	YES	Miscellaneous feature
mtbi2358029-2	2358029	4	T	TG	1	Rv2098c	PE_PGRS36	NO	Miscellaneous feature
mtbi2368564-2	2368564	2368564	TA	T	1			NO
mtbi2372436-6	2372436	133	G	GGCCCGCCGACGATGCGGGCCGCGCAGCGGGCCGCTGAGGAGGCGGGCATCAAGCAAC	1	Rv2112c	dop	YES	Coding region
mtbi2381572-2	2381572	501	AC	A	1	Rv2123	PPE37	NO	Coding region
mtbi2406842_1	2406842	2	AC	A	650	Rv2147c		NO	Coding region
mtbi2421975_1	2421975	29	G	GGGAA	965	Rv2160c		NO	Coding region
mtbi2523205-3	2523205	21	G	GCGC	1			YES	Repeat region
mtbi2525722-2	2525722	157	CG	C	1	Rv2251		NO	Coding region
mtbi2534562-3	2534562	990	GGA	G	1	Rv2262c		NO	Coding region
mtbi2536628_1	2536628	1723	G	GA	726	Rv2264c		NO	Coding region
mtbi2564368-3	2564368	664	G	GC	1	Rv2293c		NO	Coding region
mtbi2566766-3	2566766	2566766	C	CG	1			NO
mtbi2614909-2	2614909	216	GC	G	1	Rv2339	mmpL9	NO	Coding region
mtbi2632341-2	2632341	2632341	C	CA	1			NO
mtbi2703902-2	2703902	2703902	C	CG	1			NO
mtbi2704884-26	2704884	187	A	ACAGCGACCATATCGCCGAGCT	1	Rv2407		YES	Coding region
mtbi2724180-2	2724180	3	TCACGATCGGGTCTCCTCTAG	T	1	Rv2426c		NO	Coding region
mtbi2734481_1	2734481	106	TA	T	633	Rv2437		NO	Coding region
mtbi2796131-3	2796131	1254	GC	G	1	Rv2487c	PE_PGRS42	NO	Coding region
mtbi2851160-5	2851160	69	GAA	G	1	Rv2526	vapB17	NO	Coding region
mtbi2851164_1	2851164	74	CATT	C	268	Rv2526	vapB17	YES	Coding region
mtbi2866755-4	2866755	287	CAACATACAACAGTCT	C	1	Rv2543	lppA	YES	Coding region
mtbi2866773-1	2866773	305	C	CGGG	1	Rv2543	lppA	YES	Coding region
mtbi2866778-1	2866778	310	A	AGGCCGAT	1	Rv2543	lppA	NO	Coding region
mtbi2866781-1	2866781	313	G	GGA	1	Rv2543	lppA	NO	Coding region
mtbi2866783-1	2866783	315	G	GGTTTGT	1	Rv2543	lppA	YES	Coding region
mtbi2866784-1	2866784	316	CACT	C	1	Rv2543	lppA	YES	Coding region
mtbi2866790-1	2866790	322	GCGA	G	1	Rv2543	lppA	YES	Coding region
mtbi2866797-1	2866797	329	G	GGAA	1	Rv2543	lppA	YES	Coding region
mtbi2866833-1	2866833	365	CA	C	1	Rv2543	lppA	NO	Coding region
mtbi2866836-1	2866836	368	C	CA	1	Rv2543	lppA	NO	Coding region
mtbi2867407_1	2867407	284	AC	A	117	Rv2544	lppB	NO	Coding region
mtbi2867411-1	2867411	287	CTA	C	1	Rv2544	lppB	NO	Coding region
mtbi2867414-1	2867414	290	C	CGCCG	1	Rv2544	lppB	NO	Coding region
mtbi2867417-1	2867417	293	CCAAGACTTCTATA	C	1	Rv2544	lppB	NO	Coding region
mtbi2867436-1	2867436	312	G	GCC	1	Rv2544	lppB	NO	Coding region
mtbi2867441-1	2867441	317	G	GGGAAGGT	1	Rv2544	lppB	NO	Coding region
mtbi2867445-1	2867445	321	T	TC	1	Rv2544	lppB	NO	Coding region
mtbi2867447-1	2867447	323	T	TGC	1	Rv2544	lppB	NO	Coding region
mtbi2867488-1	2867488	364	AAC	A	1	Rv2544	lppB	NO	Coding region
mtbi2867492-1	2867492	368	G	GCA	1	Rv2544	lppB	NO	Coding region
mtbi2867505-1	2867505	381	A	ACT	1	Rv2544	lppB	NO	Coding region
mtbi2867506-1	2867506	382	GCA	G	1	Rv2544	lppB	NO	Coding region
mtbi2867880_1	2867880	98	TA	T	682	Rv2545	vapB18	NO	Coding region
mtbi2881597-2	2881597	188	AG	A	1	Rv2561		NO	Coding region
mtbi2990584-8	2990584	1293	C	CAGCGGTGATCGCAAGCGCGGCGAGCCGGGCGCAGCGGGTCACCGCCATCGGGACT	1	Rv2673	aftC	NO	Coding region
mtbi3021892-2	3021892	53	GTTCGACGAC	G	1	Rv2709		YES	Coding region
mtbi3131469-4	3131469	304	T	TTGTCGGCGA	1	Rv2823c		YES	Coding region
mtbi3156201-2	3156201	1320	C	CG	1	Rv2848c	cobB	NO	Coding region
mtbi3174692-2	3174692	3174692	AC	A	1			NO
mtbi3190145-3	3190145	533	TC	T	1	Rv2880c		NO	Coding region
mtbi3194241-5	3194241	1307	C	CG	1	Rv2885c		NO	Coding region
mtbi3215622_1	3215622	3215622	CG	C	713			NO
mtbi3238119-3	3238119	380	CGTG	C	1	Rv2923c		YES	Coding region
mtbi3247864_3	3247864	2420	C	CTAGG	2	Rv2931	ppsA	NO	Coding region
mtbi3247865-1	3247865	2420	GCAAA	G	1	Rv2931	ppsA	NO	Coding region
mtbi3296371-5	3296371	1469	G	GCCGCGGC	1	Rv2947c	pks15	NO	Coding region
mtbi3331361-2	3331361	251	ACG	A	1	Rv2975c		NO	Coding region
mtbi3379724-2	3379724	728	C	CA	1	Rv3021c	PPE47	NO	Miscellaneous feature
mtbi3379732-1	3379732	720	CCA	C	1	Rv3021c	PPE47	NO	Miscellaneous feature
mtbi3379736-1	3379736	716	C	CA	1	Rv3021c	PPE47	NO	Miscellaneous feature
mtbi3380439-2	3380439	13	G	GC	1	Rv3021c	PPE47	NO	Miscellaneous feature
mtbi3415180-2	3415180	3415180	ACACCTAGGGGGTGG	A	1			NO
mtbi3423249-15	3423249	3423249	C	CGCGAGCAGACGCAGAATCGCCCAAAATCCAAGATTTTGAGGCGATTCTGCGTCTGCTCGCGCAACCGG	1			NO
mtbi3473996-2	3473996	3473996	G	GA	1			NO
mtbi3528971-3	3528971	192	TCGC	T	1	Rv3159c	PPE53	YES	Coding region
mtbi3580636-2	3580636	3580636	CT	C	1			NO
mtbi3590686_2	3590686	3590686	G	GC	1411			NO
mtbi3610391_1	3610391	799	A	AC	879	Rv3234c	tgs3	NO	Coding region
mtbi3690950-4	3690950	3690950	T	TAGCTCGGCGACGATGCACGCCGCGCAGCGGCGTGAGGAGGAGCCGAGCAGTCCAACAC	1			NO
mtbi3761016-2	3761016	6086	GC	G	1	Rv3350c	PPE56	NO	Coding region
mtbi3779671-5	3779671	1103	C	CGGCAACGGT	1	Rv3367	PE_PGRS51	YES	Coding region
mtbi3794867-4	3794867	0	C	CCA	1	Rv3379c	dxs2	NO	Coding region
mtbi3802140-3	3802140	487	ACGGCGGGGCCGGCGGCGG	A	1	Rv3388	PE_PGRS52	YES	Coding region
mtbi3842463-2	3842463	224	TA	T	1	Rv3425	PPE57	NO	Coding region
mtbi3843407-2	3843407	371	CG	C	1	Rv3426	PPE58	NO	Coding region
mtbi3844756-2	3844756	1214	GC	G	1	Rv3428c		NO	Coding region
mtbi3846840-2	3846840	3846840	G	GCT	1			NO
mtbi3846843-4	3846843	3846843	CAAA	C	1			YES
mtbi3846850-1	3846850	3846850	C	CA	1			NO
mtbi3846852-1	3846852	3846852	CT	C	1			NO
mtbi3846881-1	3846881	3846881	AT	A	1			NO
mtbi3862472-3	3862472	3862472	GA	G	1			NO
mtbi3874722-3	3874722	318	AT	A	1	Rv3453		NO	Coding region
mtbi3880239-14	3880239	3880239	C	CGTCCGGCTCCTCCTCGGACCACTACGCGGCCCGCATCGTCGCCGACCAAATCCAACT	1			YES
mtbi3902318-2	3902318	494	A	AT	1	Rv3483c		NO	Coding region
mtbi3987370-2	3987370	3987370	CG	C	1			NO
mtbi4094346-15	4094346	406	T	TCGGCGCCGGCGGCGCCGG	1	Rv3653	PE_PGRS61	YES	Coding region
mtbi4095001_1	4095001	300	CG	C	1963	Rv3655c		NO	Coding region
mtbi4120983-3	4120983	4120983	A	AACGATGCGGGCCGCGCAGCGGGCCGCTGAGGAACCGGCCCATCAGTGACGGTCGGCG	1			YES
mtbi4124349-2	4124349	4124349	GCC	G	1			NO
mtbi4170964_1	4170964	751	G	GA	952	Rv3725		NO	Coding region
mtbi4197138-3	4197138	4197138	C	CT	1			NO
mtbi4198611-2	4198611	4198611	CG	C	1			NO
mtbi4212832-3	4212832	539	GACC	G	1	Rv3766		YES	Coding region
mtbi4221070-2	4221070	4221070	AC	A	1			NO
mtbi4231859-1	4231859	539	CGCGGTCTGTGCGCCGGGCGCACGCACCGAATTCGAGCTATTAGCGGCCGCGGCAAGGGACGCATTCGGCCTGGACGTCCACCCAGCGGT	C	1	Rv3785		NO	Coding region
mtbi4264381_1	4264381	4264381	G	GC	695			NO
mtbi4303498-3	4303498	1510	T	TG	1	Rv3829c		NO	Coding region
mtbi4305063-2	4305063	622	G	GA	1	Rv3830c		NO	Coding region
mtbi4322039-3	4322039	501	AC	A	1	Rv3847		NO	Coding region
mtbi4338595_1	4338595	4338595	GC	G	1608			NO
mtbi4348724-3	4348724	3	A	ACCCGCGCCGGCGACGATGCAAAGCGCAGCGATGAGGAGGAGCGGCGCCAACGG	1			NO	Repeat region
mtbi4359164-1	4359164	618	G	GC	1	Rv3879c	espK	NO	Coding region
mtbi4359165_4	4359165	618	G	GTGATCGGGGTTCCCGGGGTGATCGGGGTTCCCGGC	1	Rv3879c	espK	NO	Coding region
mtbi4379044-2	4379044	1408	CG	C	1	Rv3894c	eccC2	NO	Coding region
mtbi4383144-6	4383144	496	C	CCGGGG	1	Rv3897c		NO	Coding region
mtbi4400660-3	4400660	474	AC	A	1	Rv3911	sigM	NO	Coding region
			136	109

## Sheet: 1280_indel
Supplementary Material
Genomic analysis of multidrug resistant Mycobacterium tuberculosis strains from patients in Kazakhstan
Supplementary file S5 – List of genetic variants (SNPs and Indels) filtered by GMTV database.
2_1280.vcf
INDEL ID	Position in genome	Position in gene	Ref	Alt	# of samples	Locus tag	Gene	Frameshift	Genome Region
	104807	408	A	AG	0	Rv0095c		NO	Coding region
	104808	407	A	ATC	0	Rv0095c		NO	Coding region
	104811	404	CTT	C	0	Rv0095c		NO	Coding region
	334343	1967	GC	G	0	Rv0278c	PE_PGRS3	NO	Coding region
	802427	294	C	CCGGCCTAGCCCGGCGACGATGCAGAGCGAAGCGATGAGGAGGAGCAGGGCAATGCGGCCTAGCCCGGCGACGATGCAGAGCGAAGCGATGAGGAGGAGCAGGGCAATG	0	Rv0703	rplW	YES	Coding region
	927517	2156	CG	C	0	Rv0833	PE_PGRS13	NO	Coding region
	1094010	346	AATG	A	0	Rv0978c	PE_PGRS17	YES	Coding region
	1094014	342	G	GCTT	0	Rv0978c	PE_PGRS17	YES	Coding region
	1094033	323	A	AG	0	Rv0978c	PE_PGRS17	NO	Coding region
	1094037	319	G	GC	0	Rv0978c	PE_PGRS17	NO	Coding region
	1094039	317	TGC	T	0	Rv0978c	PE_PGRS17	NO	Coding region
	1094048	308	C	CACCCCCAACAGGGCCT	0	Rv0978c	PE_PGRS17	NO	Coding region
	1094050	306	CA	C	0	Rv0978c	PE_PGRS17	NO	Coding region
	1213011	1451	T	TC	0	Rv1087	PE_PGRS21	NO	Coding region
	1655829	892	GC	G	0	Rv1468c	PE_PGRS29	NO	Coding region
	2074435	492	TAGCGCGGCGACGATGCGCGCCGGGACGGCGGGCTGAGGAGGCGCGCGATAAGGCCG	T	0	Rv1829		NO	Coding region
	2146065	180	C	CGGCGGTCGCGGCGGGGCGGGCGGTAGAGGCGGCAACGGCGGGCAA	0	Rv1899c	lppD	YES	Coding region
	2215319	62	CGTGCT	C	0	Rv1971	mce3F	NO	Coding region
	2461325	1647	TAGCCCGGCGACGACCCGGGTCGGCACGACCCGGGAAGGAACCGGGCAAATCAAGCAC	T	0	Rv2196	qcrB	YES	Coding region
	2728464	383	AC	A	0	Rv2432c		NO	Coding region
	2803046	3190	GC	G	0	Rv2490c	PE_PGRS43	NO	Coding region
	2803052	3184	GC	G	0	Rv2490c	PE_PGRS43	NO	Coding region
	2804465	1771	GC	G	0	Rv2490c	PE_PGRS43	NO	Coding region
	2804474	1762	GC	G	0	Rv2490c	PE_PGRS43	NO	Coding region
	2866783	315	G	GGTTGT	0	Rv2543	lppA	NO	Coding region
	3222669	855	G	GGTT	0	Rv2914c	pknI	YES	Coding region
	3336620	3336620	TAAGTGCCGATCGCAAGCGCGGCGCTTGCGCCGGGCGCGGCGGGTCGGCACCATCGGGCTA	T	0			YES	intergenic
	3663727	38	ACCTGTGAGTCGAGTGAGCGGAACGAACGAAGTGAGTGACGGGAACGAGACGAACAATCCGGCAGAAGTGAGTGACGGGAACGAGACGAACAATCCGGCAGAAGTGAGTGACGGGAACGAGACGAACAATCCGGCC	A	0	Rv3281	accE5	YES	Coding region
	3786806	492	GC	G	0	Rv3372	otsB2	NO	Coding region
mtbi0024698-2	24698	746	GCCGCGTTGCTCGGGGTAA	G	1	Rv0020c	fhaA	YES	Coding region
mtbi0028366-2	28366	4	AT	A	1	Rv0024		NO	Coding region
mtbi0049690-2	49690	249	GCC	G	1	Rv0045c		NO	Coding region
mtbi0055546-26	55546	1883	G	GCCT	1	Rv0050	ponA1	YES	Coding region
mtbi0055553-11	55553	1890	C	CCGCCGT	1	Rv0050	ponA1	YES	Coding region
mtbi0068337-3	68337	1414	T	TC	1	Rv0063		NO	Coding region
mtbi0071584-17	71584	71584	C	CCGAGCGCTGTTCTGGCGCTAATCTGACGCTAGAATAG	1			NO
mtbi0099162-2	99162	682	TCGGTGTGCG	T	1	Rv0090		YES	Coding region
mtbi0103743-4	103743	1472	GAGGAAT	G	1			YES	Repeat region
mtbi0103752_6	103752	912	T	TAGCAGCTTC	46	Rv0094c		YES	Coding region
mtbi0104939-2	104939	276	G	GACC	1	Rv0095c		YES	Coding region
mtbi0104940-1	104940	275	CTGG	C	1	Rv0095c		YES	Coding region
mtbi0125830-2	125830	4711	G	GA	1	Rv0107c	ctpI	NO	Coding region
mtbi0131174-2	131174	131174	T	TG	1			NO
mtbi0162151-2	162151	380	GT	G	1	Rv0134	ephF	NO	Coding region
mtbi0194305_1	194305	511	C	CGG	905	Rv0165c	mce1R	NO	Coding region
mtbi0230576-2	230576	230576	G	GT	1			NO
mtbi0234496_1	234496	2266	C	CGT	2061	Rv0197		NO	Coding region
mtbi0293628-3	293628	24	A	AC	1	RVnc0008	F6	NO	Non-coding RNA
mtbi0336356-1	336356	336356	GGAA	G	1			YES
mtbi0336360-1	336360	336360	C	CCTCCCCG	1			NO
mtbi0336422-1	336422	336422	TTG	T	1			NO
mtbi0336468-1	336468	336468	G	GCGTCC	1			NO
mtbi0336472-1	336472	336472	C	CAG	1			NO
mtbi0336476_1	336476	336476	A	AGTCG	3			NO
mtbi0336557-1	336557	336557	C	CT	1			NO
mtbi0336562-1	336562	2511	A	ATGG	1	Rv0279c	PE_PGRS4	YES	Coding region
mtbi0336680-6	336680	2393	GGGGA	G	1	Rv0279c	PE_PGRS4	NO	Coding region
mtbi0336686-1	336686	2387	CGA	C	1	Rv0279c	PE_PGRS4	NO	Coding region
mtbi0336690-1	336690	2383	CT	C	1	Rv0279c	PE_PGRS4	NO	Coding region
mtbi0336694-1	336694	2379	A	ACACCGCC	1	Rv0279c	PE_PGRS4	NO	Coding region
mtbi0338788-2	338788	285	AGGTG	A	1	Rv0279c	PE_PGRS4	NO	Coding region
mtbi0368087-3	368087	4677	AGCTGCCGGTGTTGAT	A	1	Rv0304c	PPE5	YES	Coding region
mtbi0373282-3	373282	2429	TA	T	1	Rv0305c	PPE6	NO	Coding region
mtbi0424320-3	424320	374	T	TC	1	Rv0354c	PPE7	NO	Coding region
mtbi0427310-2	427310	7369	TTGCCGAGGTTTGCAC	T	1	Rv0355c	PPE8	YES	Coding region
mtbi0467497-2	467497	504	C	CG	1	Rv0388c	PPE9	NO	Coding region
mtbi0467508-2	467508	493	C	CG	1	Rv0388c	PPE9	NO	Coding region
mtbi0472711-8	472711	472711	T	TTTGTGGGCC	1			YES
mtbi0485810-3	485810	79	CA	C	1	Rv0405	pks6	NO	Coding region
mtbi0507028-2	507028	507028	GC	G	1			NO
mtbi0580773-4	580773	41	GGGGGCACCACCCGCTTGCGGGGGA	G	1			YES	Repeat region
mtbi0623558-3	623558	765	AACGGCGGCG	A	1	Rv0532	PE_PGRS6	YES	Coding region
mtbi0672512-2	672512	3404	ACCGGTGCCG	A	1	Rv0578c	PE_PGRS7	YES	Coding region
mtbi0688792-2	688792	760	T	TG	1	Rv0590	mce2B	NO	Coding region
mtbi0830868-2	830868	13	G	GGC	1	Rv0739		NO	Coding region
mtbi0854252-9	854252	854252	GC	G	1			NO
mtbi0874835-4	874835	103	C	CCG	1	Rv0782	ptrBb	NO	Coding region
mtbi0888992_2	888992	888992	AACCTCAACACCCCCTCAAGTGAAGGAGG	A	20			NO
mtbi0916685-2	916685	961	CG	C	1	Rv0823c		NO	Coding region
mtbi0916688-5	916688	958	AGC	A	1	Rv0823c		NO	Coding region
mtbi0968426-2	968426	1818	A	AGCCGGGTTG	1	Rv0872c	PE_PGRS15	YES	Coding region
mtbi0987585-4	987585	352	A	AG	1	Rv0888		NO	Coding region
mtbi1010204-3	1010204	68	C	CG	1	Rv0907		NO	Coding region
mtbi1034208-2	1034208	423	CGCT	C	1	Rv0927c		YES	Coding region
mtbi1090188-2	1090188	1090188	A	AG	1			NO
mtbi1093947_1	1093947	410	A	AAGAT	217	Rv0978c	PE_PGRS17	NO	Coding region
mtbi1093957-1	1093957	399	CGTTA	C	1	Rv0978c	PE_PGRS17	NO	Coding region
mtbi1093978-1	1093978	378	T	TG	1	Rv0978c	PE_PGRS17	NO	Coding region
mtbi1093985-1	1093985	371	GA	G	1	Rv0978c	PE_PGRS17	NO	Coding region
mtbi1094057_1	1094057	300	CACG	C	1	Rv0978c	PE_PGRS17	YES	Coding region
mtbi1165521-4	1165521	28	T	TA	1			NO	Mobile element
mtbi1168009-3	1168009	336	GC	G	1	Rv1045		NO	Coding region
mtbi1168715-2	1168715	513	C	CT	1	Rv1046c		NO	Coding region
mtbi1215104-3	1215104	335	AT	A	1	Rv1089	PE10	NO	Coding region
mtbi1252053-4	1252053	432	AG	A	1			NO	Repeat region
mtbi1273250_1	1273250	828	G	GA	857	Rv1145	mmpL13a	NO	Coding region
mtbi1276859-1	1276859	889	A	AGT	1	Rv1148c		NO	Coding region
mtbi1276865-1	1276865	883	GCA	G	1	Rv1148c		NO	Coding region
mtbi1313337_1	1313337	1313337	A	AG	1891			NO
mtbi1365837-4	1365837	1365837	C	CGG	1			NO
mtbi1368322-3	1368322	399	C	CG	1	Rv1225c		NO	Coding region
mtbi1406760_1	1406760	581	T	TG	700	Rv1258c		NO	Coding region
mtbi1413129-2	1413129	95	CG	C	1	RVnc0013	mcr11	NO	Non-coding RNA
mtbi1418863-4	1418863	90	C	CGGGAGCCA	1	Rv1269c		NO	Coding region
mtbi1443428-3	1443428	1443428	G	GGGTTAGATTGCCCGGCTCCTCAACCCGCCGTTTCGGCGTGCATCGTCGCCGGGCTA	1			NO
mtbi1529133_1	1529133	2522	CCGA	C	621	Rv1358		YES	Coding region
mtbi1612624-2	1612624	17	T	TATCGGTACCGGTGCGCCAGGG	1			YES	Repeat region
mtbi1619100-2	1619100	584	ACCGGCTCCACCGGCGCCG	A	1	Rv1441c	PE_PGRS26	YES	Coding region
mtbi1625332-3	1625332	33	C	CGGT	1	Rv1446c	opcA	YES	Coding region
mtbi1636172-3	1636172	2057	T	TCCG	1	Rv1452c	PE_PGRS28	YES	Coding region
mtbi1636979-2	1636979	1250	G	GTT	1	Rv1452c	PE_PGRS28	NO	Coding region
mtbi1636981-1	1636981	1248	GGC	G	1	Rv1452c	PE_PGRS28	NO	Coding region
mtbi1644248-5	1644248	12	G	GGGCGCGGTTCACGAGCGCCGCTCCTCCTCATCGCTTCGCTCTGCATCGTCGTC	1	Rv1458c		NO	Coding region
mtbi1696671-3	1696671	1696671	CA	C	1			NO
mtbi1753519-2	1753519	9	G	GC	1	Rv1549	fadD11.1	NO	Coding region
mtbi1756358-2	1756358	913	CG	C	1	Rv1551	plsB1	NO	Coding region
mtbi1864037-2	1864037	1345	GC	G	1	Rv1651c	PE_PGRS30	NO	Coding region
mtbi1864924-9	1864924	458	A	ACCGCCGGCCCCGCCGTCGGGT	1	Rv1651c	PE_PGRS30	YES	Coding region
mtbi1894300-9	1894300	1042	G	GGTCTTGCCGC	1	Rv1668c		NO	Coding region
mtbi1907459-4	1907459	1907459	C	CAGTCGGGTGACGATGCGGGCCGGTGTGGTCCGAGGAGGAGCCCGACAATTTAAGCT	1			NO
mtbi1955760-2	1955760	1485	CGAA	C	1	Rv1730c		YES	Coding region
mtbi1955913-11	1955913	1332	CCCGGAAG	C	1	Rv1730c		NO	Coding region
mtbi1955921-1	1955921	1324	TCGATGACCGTTG	T	1	Rv1730c		YES	Coding region
mtbi2001789-6	2001789	1175	CG	C	1	Rv1768	PE_PGRS31	NO	Coding region
mtbi2009290-2	2009290	118	GC	G	1	Rv1775		NO	Coding region
mtbi2061433-5	2061433	1241	T	TCCGCCGGCG	1	Rv1818c	PE_PGRS33	YES	Coding region
mtbi2094911-2	2094911	277	ACAGCGT	A	1	Rv1844c	gnd1	YES	Coding region
mtbi2109523-2	2109523	2109523	C	CG	1			NO
mtbi2133468-10	2133468	224	T	TTCGCATGCCGTCACC	1	Rv1883c		YES	Coding region
mtbi2137521-6	2137521	558	A	ACTCCGATCAC	1	Rv1888c		NO	Coding region
mtbi2153725-2	2153725	157	CTCATCCCCGTCTCG	C	1	Rv1907c		NO	Coding region
mtbi2161343-3	2161343	880	G	GT	1	Rv1915	aceAa	NO	Coding region
mtbi2207591_1	2207591	2207591	T	TC	1719			NO
mtbi2241031-3	2241031	872	AG	A	1	Rv1997	ctpF	NO	Coding region
mtbi2266504-1	2266504	216	T	TA	1	Rv2020c		NO	Coding region
mtbi2266511-1	2266511	209	GT	G	1	Rv2020c		NO	Coding region
mtbi2266613-2	2266613	107	G	GC	1	Rv2020c		NO	Coding region
mtbi2273733_1	2273733	776	TC	T	656	Rv2027c	dosT	NO	Coding region
mtbi2338194-11	2338194	311	A	AC	1	Rv2081c		NO	Coding region
mtbi2342649-8	2342649	841	A	AGGCGTACACAC	1	Rv2084		NO	Coding region
mtbi2352065-10	2352065	2352065	C	CCTCGCCTGGGCTGGCGAGCAGACGCAAAATCCCCCGCACGCCCGGCGTGTCGGGGGATTTTGCGTCTG	1			NO
mtbi2357268-4	2357268	765	TGCC	T	1	Rv2098c	PE_PGRS36	YES	Miscellaneous feature
mtbi2358029-2	2358029	4	T	TG	1	Rv2098c	PE_PGRS36	NO	Miscellaneous feature
mtbi2368564-2	2368564	2368564	TA	T	1			NO
mtbi2372436-6	2372436	133	G	GGCCCGCCGACGATGCGGGCCGCGCAGCGGGCCGCTGAGGAGGCGGGCATCAAGCAAC	1	Rv2112c	dop	YES	Coding region
mtbi2381572-2	2381572	501	AC	A	1	Rv2123	PPE37	NO	Coding region
mtbi2406842_1	2406842	2	AC	A	650	Rv2147c		NO	Coding region
mtbi2421975_1	2421975	29	G	GGGAA	965	Rv2160c		NO	Coding region
mtbi2523205-3	2523205	21	G	GCGC	1			YES	Repeat region
mtbi2525722-2	2525722	157	CG	C	1	Rv2251		NO	Coding region
mtbi2534562-3	2534562	990	GGA	G	1	Rv2262c		NO	Coding region
mtbi2536628_1	2536628	1723	G	GA	726	Rv2264c		NO	Coding region
mtbi2564368-3	2564368	664	G	GC	1	Rv2293c		NO	Coding region
mtbi2566766-3	2566766	2566766	C	CG	1			NO
mtbi2614909-2	2614909	216	GC	G	1	Rv2339	mmpL9	NO	Coding region
mtbi2632341-2	2632341	2632341	C	CA	1			NO
mtbi2703902-2	2703902	2703902	C	CG	1			NO
mtbi2704884-26	2704884	187	A	ACAGCGACCATATCGCCGAGCT	1	Rv2407		YES	Coding region
mtbi2724180-2	2724180	3	TCACGATCGGGTCTCCTCTAG	T	1	Rv2426c		NO	Coding region
mtbi2734481_1	2734481	106	TA	T	633	Rv2437		NO	Coding region
mtbi2851160-5	2851160	69	GAA	G	1	Rv2526	vapB17	NO	Coding region
mtbi2851164_1	2851164	74	CATT	C	268	Rv2526	vapB17	YES	Coding region
mtbi2866755-4	2866755	287	CAACATACAACAGTCT	C	1	Rv2543	lppA	YES	Coding region
mtbi2866773-1	2866773	305	C	CGGG	1	Rv2543	lppA	YES	Coding region
mtbi2866778-1	2866778	310	A	AGGCCGAT	1	Rv2543	lppA	NO	Coding region
mtbi2866781-1	2866781	313	G	GGA	1	Rv2543	lppA	NO	Coding region
mtbi2866784-1	2866784	316	CACT	C	1	Rv2543	lppA	YES	Coding region
mtbi2866790-1	2866790	322	GCGA	G	1	Rv2543	lppA	YES	Coding region
mtbi2866797-1	2866797	329	G	GGAA	1	Rv2543	lppA	YES	Coding region
mtbi2866833-1	2866833	365	CA	C	1	Rv2543	lppA	NO	Coding region
mtbi2866836-1	2866836	368	C	CA	1	Rv2543	lppA	NO	Coding region
mtbi2867407_1	2867407	284	AC	A	117	Rv2544	lppB	NO	Coding region
mtbi2867411-1	2867411	287	CTA	C	1	Rv2544	lppB	NO	Coding region
mtbi2867414-1	2867414	290	C	CGCCG	1	Rv2544	lppB	NO	Coding region
mtbi2867417-1	2867417	293	CCAAGACTTCTATA	C	1	Rv2544	lppB	NO	Coding region
mtbi2867436-1	2867436	312	G	GCC	1	Rv2544	lppB	NO	Coding region
mtbi2867441-1	2867441	317	G	GGGAAGGT	1	Rv2544	lppB	NO	Coding region
mtbi2867445-1	2867445	321	T	TC	1	Rv2544	lppB	NO	Coding region
mtbi2867447-1	2867447	323	T	TGC	1	Rv2544	lppB	NO	Coding region
mtbi2867488-1	2867488	364	AAC	A	1	Rv2544	lppB	NO	Coding region
mtbi2867492-1	2867492	368	G	GCA	1	Rv2544	lppB	NO	Coding region
mtbi2867505-1	2867505	381	A	ACT	1	Rv2544	lppB	NO	Coding region
mtbi2867506-1	2867506	382	GCA	G	1	Rv2544	lppB	NO	Coding region
mtbi2867880_1	2867880	98	TA	T	682	Rv2545	vapB18	NO	Coding region
mtbi2873093-4	2873093	172	G	GCCA	1	Rv2553c		YES	Coding region
mtbi2881597-2	2881597	188	AG	A	1	Rv2561		NO	Coding region
mtbi2990584-8	2990584	1293	C	CAGCGGTGATCGCAAGCGCGGCGAGCCGGGCGCAGCGGGTCACCGCCATCGGGACT	1	Rv2673	aftC	NO	Coding region
mtbi3021892-2	3021892	53	GTTCGACGAC	G	1	Rv2709		YES	Coding region
mtbi3131469-4	3131469	304	T	TTGTCGGCGA	1	Rv2823c		YES	Coding region
mtbi3156201-2	3156201	1320	C	CG	1	Rv2848c	cobB	NO	Coding region
mtbi3174692-2	3174692	3174692	AC	A	1			NO
mtbi3190145-3	3190145	533	TC	T	1	Rv2880c		NO	Coding region
mtbi3194241-5	3194241	1307	C	CG	1	Rv2885c		NO	Coding region
mtbi3215622_1	3215622	3215622	CG	C	713			NO
mtbi3238119-3	3238119	380	CGTG	C	1	Rv2923c		YES	Coding region
mtbi3247864_3	3247864	2420	C	CTAGG	2	Rv2931	ppsA	NO	Coding region
mtbi3247865-1	3247865	2420	GCAAA	G	1	Rv2931	ppsA	NO	Coding region
mtbi3296371-5	3296371	1469	G	GCCGCGGC	1	Rv2947c	pks15	NO	Coding region
mtbi3331361-2	3331361	251	ACG	A	1	Rv2975c		NO	Coding region
mtbi3379724-2	3379724	728	C	CA	1	Rv3021c	PPE47	NO	Miscellaneous feature
mtbi3379732-1	3379732	720	CCA	C	1	Rv3021c	PPE47	NO	Miscellaneous feature
mtbi3379736-1	3379736	716	C	CA	1	Rv3021c	PPE47	NO	Miscellaneous feature
mtbi3380439-2	3380439	13	G	GC	1	Rv3021c	PPE47	NO	Miscellaneous feature
mtbi3415180-2	3415180	3415180	ACACCTAGGGGGTGG	A	1			NO
mtbi3423249-15	3423249	3423249	C	CGCGAGCAGACGCAGAATCGCCCAAAATCCAAGATTTTGAGGCGATTCTGCGTCTGCTCGCGCAACCGG	1			NO
mtbi3473996-2	3473996	3473996	G	GA	1			NO
mtbi3580636-2	3580636	3580636	CT	C	1			NO
mtbi3590686_2	3590686	3590686	G	GC	1411			NO
mtbi3610391_1	3610391	799	A	AC	879	Rv3234c	tgs3	NO	Coding region
mtbi3690950-4	3690950	3690950	T	TAGCTCGGCGACGATGCACGCCGCGCAGCGGCGTGAGGAGGAGCCGAGCAGTCCAACAC	1			NO
mtbi3761016-2	3761016	6086	GC	G	1	Rv3350c	PPE56	NO	Coding region
mtbi3794867-4	3794867	0	C	CCA	1	Rv3379c	dxs2	NO	Coding region
mtbi3802140-3	3802140	487	ACGGCGGGGCCGGCGGCGG	A	1	Rv3388	PE_PGRS52	YES	Coding region
mtbi3842463-2	3842463	224	TA	T	1	Rv3425	PPE57	NO	Coding region
mtbi3843407-2	3843407	371	CG	C	1	Rv3426	PPE58	NO	Coding region
mtbi3844756-2	3844756	1214	GC	G	1	Rv3428c		NO	Coding region
mtbi3846840-2	3846840	3846840	G	GCT	1			NO
mtbi3846843-4	3846843	3846843	CAAA	C	1			YES
mtbi3846850-1	3846850	3846850	C	CA	1			NO
mtbi3846852-1	3846852	3846852	CT	C	1			NO
mtbi3846881-1	3846881	3846881	AT	A	1			NO
mtbi3862472-3	3862472	3862472	GA	G	1			NO
mtbi3874722-3	3874722	318	AT	A	1	Rv3453		NO	Coding region
mtbi3880239-14	3880239	3880239	C	CGTCCGGCTCCTCCTCGGACCACTACGCGGCCCGCATCGTCGCCGACCAAATCCAACT	1			YES
mtbi3890778_1	3890778	3890778	CTGA	C	1383			YES
mtbi3902318-2	3902318	494	A	AT	1	Rv3483c		NO	Coding region
mtbi3987370-2	3987370	3987370	CG	C	1			NO
mtbi4094346-15	4094346	406	T	TCGGCGCCGGCGGCGCCGG	1	Rv3653	PE_PGRS61	YES	Coding region
mtbi4095001_1	4095001	300	CG	C	1963	Rv3655c		NO	Coding region
mtbi4124349-2	4124349	4124349	GCC	G	1			NO
mtbi4170964_1	4170964	751	G	GA	952	Rv3725		NO	Coding region
mtbi4197138-3	4197138	4197138	C	CT	1			NO
mtbi4198611-2	4198611	4198611	CG	C	1			NO
mtbi4212832-3	4212832	539	GACC	G	1	Rv3766		YES	Coding region
mtbi4221070-2	4221070	4221070	AC	A	1			NO
mtbi4231859-1	4231859	539	CGCGGTCTGTGCGCCGGGCGCACGCACCGAATTCGAGCTATTAGCGGCCGCGGCAAGGGACGCATTCGGCCTGGACGTCCACCCAGCGGT	C	1	Rv3785		NO	Coding region
mtbi4264381_1	4264381	4264381	G	GC	695			NO
mtbi4303498-3	4303498	1510	T	TG	1	Rv3829c		NO	Coding region
mtbi4305063-2	4305063	622	G	GA	1	Rv3830c		NO	Coding region
mtbi4322039-3	4322039	501	AC	A	1	Rv3847		NO	Coding region
mtbi4338595_1	4338595	4338595	GC	G	1608			NO
mtbi4348724-3	4348724	3	A	ACCCGCGCCGGCGACGATGCAAAGCGCAGCGATGAGGAGGAGCGGCGCCAACGG	1			NO	Repeat region
mtbi4359164-1	4359164	618	G	GC	1	Rv3879c	espK	NO	Coding region
mtbi4359165_4	4359165	618	G	GTGATCGGGGTTCCCGGGGTGATCGGGGTTCCCGGC	1	Rv3879c	espK	NO	Coding region
mtbi4379044-2	4379044	1408	CG	C	1	Rv3894c	eccC2	NO	Coding region
mtbi4383144-6	4383144	496	C	CCGGGG	1	Rv3897c		NO	Coding region
mtbi4400660-3	4400660	474	AC	A	1	Rv3911	sigM	NO	Coding region
			136	109

## Sheet: 1410_snp
Supplementary Material
Genomic analysis of multidrug resistant Mycobacterium tuberculosis strains from patients in Kazakhstan
Supplementary file S5 – List of genetic variants (SNPs and Indels) filtered by GMTV database.
5_1410.vcf
SNP ID	Position in genome	Position in gene	Ref	Alt	# of samples	Locus tag	Gene	Codon	Codon Number	Amin acid	Effect	Genome Region
	82182	506	A	G	0	Rv0073		GAA/GAG	169	NULL	Syn	Coding region
	429336	5343	T	C	0	Rv0355c	PPE8	ATA/GTA	1782	NULL	Nonsyn	Coding region
	514990	331	G	A	0	Rv0425c	ctpH	CCG/CTG	111	NULL	Nonsyn	Coding region
	575567	219	C	G	0	Rv0486	mshA	CAA/GAA	74	NULL	Nonsyn	Coding region
	861055	143	C	G	0	Rv0768	aldA	GGC/GGG	48	NULL	Syn	Coding region
	1632144	2483	G	A	0	Rv1450c	PE_PGRS27	GGC/GGT	828	NULL	Syn	Coding region
	1754911	1195	G	C	0	Rv1550	fadD11	GGA/GCA	399	NULL	Nonsyn	Coding region
	2304902	2084	G	T	0	Rv2048c	pks12	GCC/GCA	695	NULL	Syn	Coding region
	2791461	1033	A	G	0	Rv2484c		ATC/ACC	345	NULL	Nonsyn	Coding region
	2828958	845	G	A	0	Rv2512c		TAC/TAT	282	NULL	Syn	Coding region
	3024511	817	G	T	0	Rv2712c		GCC/GAC	273	NULL	Nonsyn	Coding region
	3366162	288	G	T	0	Rv3007c		CAA/AAA	97	NULL	Nonsyn	Coding region
	3739227	3547	T	C	0	Rv3345c	PE_PGRS50	AAC/AGC	1183	NULL	Nonsyn	Coding region
	3958283	762	G	C	0	Rv3521		GTC/CTC	255	NULL	Nonsyn	Coding region
mtbs0000698_A	698	698	G	A	29	Rv0001	dnaA	CGG/CAG	233	R/Q	Nonsyn	Coding region
mtbs0001849_A	1849	1849	C	A	816
mtbs0001977_G	1977	1977	A	G	1854
mtbs0004013_C	4013	734	T	C	1870	Rv0003	recF	ATC/ACC	245	I/T	Nonsyn	Coding region
mtbs0007362_C	7362	61	G	C	1917	Rv0006	gyrA	GAG/CAG	21	E/Q	Nonsyn	Coding region
mtbs0007585_C	7585	284	G	C	1808	Rv0006	gyrA	AGC/ACC	95	S/T	Nonsyn	Coding region
mtbs0009304_A	9304	2003	G	A	1841	Rv0006	gyrA	GGC/GAC	668	G/D	Nonsyn	Coding region
mtbs0011820_G	11820	11820	C	G	735
mtbs0011879_G	11879	433	A	G	2032	Rv0008c		TCC/CCC	145	S/P	Nonsyn	Coding region
mtbs0014785_C	14785	697	T	C	1895	Rv0012		TGC/CGC	233	C/R	Nonsyn	Coding region
mtbs0014861_T	14861	773	G	T	757	Rv0012		GGC/GTC	258	G/V	Nonsyn	Coding region
mtbs0015117_G	15117	204	C	G	974	Rv0013	trpG	ATC/ATG	68	I/M	Nonsyn	Coding region
mtbs0016119_A	16119	1352	C	A	757	Rv0014c	pknB	CGC/CTC	451	R/L	Nonsyn	Coding region
mtbs0017654_G	17654	1109	T	G	805	Rv0015c	pknA	CAG/CCG	370	Q/P	Nonsyn	Coding region
mtbs0017657_C	17657	1106	T	C	808	Rv0015c	pknA	CAG/CGG	369	Q/R	Nonsyn	Coding region
mtbs0021795_A	21795	1387	G	A	2248	Rv0018c	pstP	CCG/TCG	463	P/S	Nonsyn	Coding region
mtbs0025610_C	25610	25610	G	C	742
mtbs0026959_G	26959	26959	C	G	1968
mtbs0034044_C	34044	34044	T	C	1849
mtbs0037031_G	37031	165	C	G	1912	Rv0034		GCC/GCG	55	A/A	Syn	Coding region
mtbs0037305_G	37305	47	C	G	769	Rv0035	fadD34	TCG/TGG	16	S/W	Nonsyn	Coding region
mtbs0037334_T	37334	76	A	T	749	Rv0035	fadD34	ACT/TCT	26	T/S	Nonsyn	Coding region
mtbs0039158_G	39158	672	C	G	846	Rv0036c		CGG/CGC	224	R/R	Syn	Coding region
mtbs0042227_A	42227	125	G	A	66	Rv0039c		ACG/ATG	42	T/M	Nonsyn	Coding region
mtbs0042281_A	42281	71	C	A	1073	Rv0039c		TGC/TTC	24	C/F	Nonsyn	Coding region
mtbs0042967_C	42967	399	G	C	2040	Rv0040c	mtc28	CCC/CCG	133	P/P	Syn	Coding region
mtbs0044768_G	44768	1207	A	G	770	Rv0041	leuS	AGG/GGG	403	R/G	Nonsyn	Coding region
mtbs0048503_C	48503	525	T	C	777	Rv0044c		CGA/CGG	175	R/R	Syn	Coding region
mtbs0049360_T	49360	580	C	T	876	Rv0045c		GTC/ATC	194	V/I	Nonsyn	Coding region
mtbs0050557_C	50557	568	T	C	1255	Rv0046c	ino1	AGG/GGG	190	R/G	Nonsyn	Coding region
mtbs0051949_G	51949	749	A	G	1223	Rv0048c		GTC/GCC	250	V/A	Nonsyn	Coding region
mtbs0054394_G	54394	732	A	G	1254	Rv0050	ponA1	GCA/GCG	244	A/A	Syn	Coding region
mtbs0062049_G	62049	1654	A	G	2156	Rv0058	dnaB	AGG/GGG	552	R/G	Nonsyn	Coding region
mtbs0063146_T	63146	63146	G	T	724
mtbs0069989_A	69989	1370	G	A	2045	Rv0064		GGT/GAT	457	G/D	Nonsyn	Coding region
mtbs0070267_T	70267	1648	G	T	950	Rv0064		GTC/TTC	550	V/F	Nonsyn	Coding region
mtbs0070816_G	70816	2197	A	G	2022	Rv0064		AAC/GAC	733	N/D	Nonsyn	Coding region
mtbs0071336_C	71336	2717	G	C	2339	Rv0064		CGC/CCC	906	R/P	Nonsyn	Coding region
mtbs0075233_A	75233	75233	C	A	890
mtbs0075940_C	75940	640	G	C	1976	Rv0068		GTG/CTG	214	V/L	Nonsyn	Coding region
mtbs0080616_G	80616	80616	C	G	1038
mtbs0087468_T	87468	334	C	T	789	Rv0078A		GAG/AAG	112	E/K	Nonsyn	Coding region
mtbs0092199_G	92199	1800	T	G	2040	Rv0083		ACT/ACG	600	T/T	Syn	Coding region
mtbs0094388_A	94388	438	G	A	771	Rv0086	hycQ	GGG/GGA	146	G/G	Syn	Coding region
mtbs0096894_T	96894	96894	C	T	712
mtbs0097350_C	97350	424	A	C	736	Rv0088		AGG/CGG	142	R/R	Syn	Coding region
mtbs0104915_C	104915	301	T	C	554			ACC/GCC	101	T/A	Nonsyn	Repeat region
mtbs0104919_A	104919	297	G	A	546			CTC/CTT	99	L/L	Syn	Repeat region
mtbs0104936_C	104936	280	T	C	1134			ACG/GCG	94	T/A	Nonsyn	Repeat region
mtbs0104944_A	104944	272	G	A	1234			GCC/GTC	91	A/V	Nonsyn	Repeat region
mtbs0104962_A	104962	254	G	A	1415			GCG/GTG	85	A/V	Nonsyn	Repeat region
mtbs0105045_C	105045	171	G	C	1444			GAC/GAG	57	D/E	Nonsyn	Repeat region
mtbs0105139_A	105139	77	C	A	718			GGG/GTG	26	G/V	Nonsyn	Repeat region
mtbs0105736_C	105736	413	T	C	892	Rv0096	PPE1	GTC/GCC	138	V/A	Nonsyn	Coding region
mtbs0116000_G	116000	6000	T	G	2024	Rv0101	nrp	GTT/GTG	2000	V/V	Syn	Coding region
mtbs0122109_G	122109	65	A	G	2132	Rv0103c	ctpB	TTG/TCG	22	L/S	Nonsyn	Coding region
mtbs0123454_T	123454	1138	C	T	749	Rv0104		CAA/TAA	380	Q/Stop	Nonsyn	Coding region
mtbs0123520_C	123520	1204	T	C	958	Rv0104		TAT/CAT	402	Y/H	Nonsyn	Coding region
mtbs0132417_G	132417	1036	C	G	2347	Rv0109	PE_PGRS1	CGC/GGC	346	R/G	Nonsyn	Coding region
mtbs0133839_T	133839	133839	C	T	1866
mtbs0135329_T	135329	1380	C	T	789	Rv0111		CCC/CCT	460	P/P	Syn	Coding region
mtbs0139297_T	139297	785	G	T	768	Rv0115	hddA	GGC/GTC	262	G/V	Nonsyn	Coding region
mtbs0141623_A	141623	424	G	A	730	Rv0117	oxyS	GAT/AAT	142	D/N	Nonsyn	Coding region
mtbs0143207_C	143207	670	T	C	996	Rv0118c	oxcA	AGC/GGC	224	S/G	Nonsyn	Coding region
mtbs0146087_C	146087	1685	T	C	1977	Rv0120c	fusA2	AAT/AGT	562	N/S	Nonsyn	Coding region
mtbs0146236_G	146236	1536	C	G	809	Rv0120c	fusA2	GCG/GCC	512	A/A	Syn	Coding region
mtbs0147262_T	147262	510	G	T	759	Rv0120c	fusA2	GAC/GAA	170	D/E	Nonsyn	Coding region
mtbs0151798_G	151798	651	A	G	65	Rv0125	pepA	GGA/GGG	217	G/G	Syn	Coding region
mtbs0154283_C	154283	52	T	C	2034	Rv0127	mak	TCG/CCG	18	S/P	Nonsyn	Coding region
mtbs0163705_T	163705	340	C	T	854	Rv0136	cyp138	CCT/TCT	114	P/S	Nonsyn	Coding region
mtbs0163706_T	163706	341	C	T	852	Rv0136	cyp138	CCT/CTT	114	P/L	Nonsyn	Coding region
mtbs0177857_A	177857	1453	G	A	2259	Rv0151c	PE1	CTG/TTG	485	L/L	Syn	Coding region
mtbs0182824_A	182824	375	G	A	782	Rv0154c	fadE2	ATC/ATT	125	I/I	Syn	Coding region
mtbs0183091_G	183091	108	C	G	788	Rv0154c	fadE2	CCG/CCC	36	P/P	Syn	Coding region
mtbs0188800_C	188800	40	T	C	2130	Rv0159c	PE3	ACG/GCG	14	T/A	Nonsyn	Coding region
mtbs0194681_C	194681	135	G	C	1900	Rv0165c	mce1R	CTC/CTG	45	L/L	Syn	Coding region
mtbs0195682_G	195682	690	C	G	770	Rv0166	fadD5	GTC/GTG	230	V/V	Syn	Coding region
mtbs0196522_T	196522	1530	C	T	106	Rv0166	fadD5	GAC/GAT	510	D/D	Syn	Coding region
mtbs0196642_T	196642	1650	C	T	1684	Rv0166	fadD5	AAC/AAT	550	N/N	Syn	Coding region
mtbs0199470_G	199470	937	T	G	1009	Rv0169	mce1A	TCC/GCC	313	S/A	Nonsyn	Coding region
mtbs0203038_C	203038	563	T	C	747	Rv0172	mce1D	ATC/ACC	188	I/T	Nonsyn	Coding region
mtbs0204094_T	204094	30	G	T	757	Rv0173	lprK	GTG/GTT	10	V/V	Syn	Coding region
mtbs0206339_C	206339	1109	T	C	2004	Rv0174	mce1F	CTG/CCG	370	L/P	Nonsyn	Coding region
mtbs0213147_A	213147	994	C	A	766	Rv0182c	sigG	GAC/TAC	332	D/Y	Nonsyn	Coding region
mtbs0213281_T	213281	860	C	T	781	Rv0182c	sigG	GGC/GAC	287	G/D	Nonsyn	Coding region
mtbs0215977_T	215977	263	C	T	807	Rv0185		GCG/GTG	88	A/V	Nonsyn	Coding region
mtbs0217201_C	217201	933	T	C	995	Rv0186	bglS	AAT/AAC	311	N/N	Syn	Coding region
mtbs0223942_C	223942	379	T	C	2289	Rv0192		TCG/CCG	127	S/P	Nonsyn	Coding region
mtbs0225323_C	225323	1249	T	C	1992	Rv0193c		AAG/GAG	417	K/E	Nonsyn	Coding region
mtbs0227098_C	227098	221	T	C	1904	Rv0194		ATG/ACG	74	M/T	Nonsyn	Coding region
mtbs0230170_T	230170	3293	C	T	792	Rv0194		CCC/CTC	1098	P/L	Nonsyn	Coding region
mtbs0231114_G	231114	216	C	G	1774	Rv0195		GCC/GCG	72	A/A	Syn	Coding region
mtbs0234477_G	234477	2247	T	G	2287	Rv0197		TAT/TAG	749	Y/Stop	Nonsyn	Coding region
mtbs0249522_C	249522	485	T	C	1095	Rv0209		GTG/GCG	162	V/A	Nonsyn	Coding region
mtbs0261869_C	261869	946	T	C	2307	Rv0218		TGT/CGT	316	C/R	Nonsyn	Coding region
mtbs0262268_T	262268	15	A	T	884	Rv0219		GCA/GCT	5	A/A	Syn	Coding region
mtbs0264129_A	264129	63	G	A	758	Rv0221		ATG/ATA	21	M/I	Nonsyn	Coding region
mtbs0265554_C	265554	48	A	C	1853	Rv0222	echA1	GTA/GTC	16	V/V	Syn	Coding region
mtbs0267751_C	267751	14	G	C	766	Rv0223c		GCC/GGC	5	A/G	Nonsyn	Coding region
mtbs0270430_C	270430	1135	G	C	856	Rv0226c		CCT/GCT	379	P/A	Nonsyn	Coding region
mtbs0278021_C	278021	123	T	C	817	Rv0232		CGT/CGC	41	R/R	Syn	Coding region
mtbs0278681_G	278681	97	C	G	1980	Rv0233	nrdB	CAT/GAT	33	H/D	Nonsyn	Coding region
mtbs0282892_T	282892	3960	C	T	840	Rv0236c	aftD	ACG/ACA	1320	T/T	Syn	Coding region
mtbs0283610_A	283610	3242	G	A	885	Rv0236c	aftD	GCC/GTC	1081	A/V	Nonsyn	Coding region
mtbs0283614_C	283614	3238	T	C	2089	Rv0236c	aftD	AGC/GGC	1080	S/G	Nonsyn	Coding region
mtbs0285772_C	285772	1080	A	C	2245	Rv0236c	aftD	CCT/CCG	360	P/P	Syn	Coding region
mtbs0285871_G	285871	981	A	G	2129	Rv0236c	aftD	GTT/GTC	327	V/V	Syn	Coding region
mtbs0288260_T	288260	1075	C	T	752	Rv0237	lpqI	CTG/TTG	359	L/L	Syn	Coding region
mtbs0295731_C	295731	295731	T	C	460
mtbs0296312_T	296312	308	C	T	741	Rv0245		TCC/TTC	103	S/F	Nonsyn	Coding region
mtbs0304923_G	304923	2058	A	G	1246	Rv0252	nirB	AAA/AAG	686	K/K	Syn	Coding region
mtbs0305188_T	305188	2323	G	T	749	Rv0252	nirB	GTG/TTG	775	V/L	Nonsyn	Coding region
mtbs0310973_A	310973	545	G	A	2036	Rv0259c		GCG/GTG	182	A/V	Nonsyn	Coding region
mtbs0311613_T	311613	1047	G	T	1937	Rv0260c		GTC/GTA	349	V/V	Syn	Coding region
mtbs0311889_T	311889	771	C	T	712	Rv0260c		ACG/ACA	257	T/T	Syn	Coding region
mtbs0325505_C	325505	939	T	C	963	Rv0270	fadD2	GTT/GTC	313	V/V	Syn	Coding region
mtbs0325703_T	325703	1137	C	T	65	Rv0270	fadD2	GGC/GGT	379	G/G	Syn	Coding region
mtbs0333892_C	333892	2419	G	C	1969	Rv0278c	PE_PGRS3	CGC/GGC	807	R/G	Nonsyn	Coding region
mtbs0336535_G	336535	336535	T	G	49
mtbs0336537_G	336537	336537	T	G	37
mtbs0336540_T	336540	336540	G	T	28
mtbs0336546_G	336546	336546	T	G	25
mtbs0336560_C	336560	2514	T	C	16	Rv0279c	PE_PGRS4	TAA/TAG	838	Stop/Stop	Syn	Coding region
mtbs0336590_C	336590	2484	G	C	55	Rv0279c	PE_PGRS4	ATC/ATG	828	I/M	Nonsyn	Coding region
mtbs0336592_G	336592	2482	T	G	53	Rv0279c	PE_PGRS4	ATC/CTC	828	I/L	Nonsyn	Coding region
mtbs0336611_C	336611	2463	G	C	54	Rv0279c	PE_PGRS4	GCC/GCG	821	A/A	Syn	Coding region
mtbs0336617_C	336617	2457	G	C	57	Rv0279c	PE_PGRS4	CCC/CCG	819	P/P	Syn	Coding region
mtbs0336620_C	336620	2454	T	C	59	Rv0279c	PE_PGRS4	ACA/ACG	818	T/T	Syn	Coding region
mtbs0336698_G	336698	2376	C	G	213	Rv0279c	PE_PGRS4	GGG/GGC	792	G/G	Syn	Coding region
mtbs0336701_G	336701	2373	A	G	506	Rv0279c	PE_PGRS4	GGT/GGC	791	G/G	Syn	Coding region
mtbs0336707_A	336707	2367	G	A	547	Rv0279c	PE_PGRS4	GAC/GAT	789	D/D	Syn	Coding region
mtbs0336708_C	336708	2366	T	C	773	Rv0279c	PE_PGRS4	GAC/GGC	789	D/G	Nonsyn	Coding region
mtbs0336710_G	336710	2364	A	G	785	Rv0279c	PE_PGRS4	GCT/GCC	788	A/A	Syn	Coding region
mtbs0338768_A	338768	306	G	A	111	Rv0279c	PE_PGRS4	ATC/ATT	102	I/I	Syn	Coding region
mtbs0338774_A	338774	300	G	A	111	Rv0279c	PE_PGRS4	GCC/GCT	100	A/A	Syn	Coding region
mtbs0338775_T	338775	299	G	T	110	Rv0279c	PE_PGRS4	GCC/GAC	100	A/D	Nonsyn	Coding region
mtbs0338777_C	338777	297	G	C	111	Rv0279c	PE_PGRS4	CTC/CTG	99	L/L	Syn	Coding region
mtbs0338844_G	338844	230	A	G	1286	Rv0279c	PE_PGRS4	GTG/GCG	77	V/A	Nonsyn	Coding region
mtbs0338845_T	338845	229	C	T	1239	Rv0279c	PE_PGRS4	GTG/ATG	77	V/M	Nonsyn	Coding region
mtbs0338876_A	338876	198	G	A	1165	Rv0279c	PE_PGRS4	AGC/AGT	66	S/S	Syn	Coding region
mtbs0338903_C	338903	171	G	C	1228	Rv0279c	PE_PGRS4	GCC/GCG	57	A/A	Syn	Coding region
mtbs0338960_C	338960	114	T	C	1254	Rv0279c	PE_PGRS4	GCA/GCG	38	A/A	Syn	Coding region
mtbs0338963_C	338963	111	T	C	1242	Rv0279c	PE_PGRS4	ACA/ACG	37	T/T	Syn	Coding region
mtbs0340132_A	340132	769	G	A	885	Rv0280	PPE3	GAA/AAA	257	E/K	Nonsyn	Coding region
mtbs0340372_C	340372	1009	T	C	2112	Rv0280	PPE3	TCG/CCG	337	S/P	Nonsyn	Coding region
mtbs0342146_C	342146	17	A	C	1036	Rv0282	eccA3	GAA/GCA	6	E/A	Nonsyn	Coding region
mtbs0346275_G	346275	641	C	G	1948	Rv0284	eccC3	CCG/CGG	214	P/R	Nonsyn	Coding region
mtbs0353309_A	353309	227	G	A	778	Rv0290	eccD3	AGC/AAC	76	S/N	Nonsyn	Coding region
mtbs0353365_A	353365	283	G	A	797	Rv0290	eccD3	GCC/ACC	95	A/T	Nonsyn	Coding region
mtbs0356528_G	356528	649	A	G	2072	Rv0292	eccE3	AAT/GAT	217	N/D	Nonsyn	Coding region
mtbs0363464_A	363464	213	G	A	771	Rv0298		CGG/CGA	71	R/R	Syn	Coding region
mtbs0372913_C	372913	2799	A	C	1287	Rv0305c	PPE6	GGT/GGG	933	G/G	Syn	Coding region
mtbs0374353_G	374353	1359	A	G	730	Rv0305c	PPE6	CGT/CGC	453	R/R	Syn	Coding region
mtbs0376774_C	376774	282	T	C	1975	Rv0307c		GCA/GCG	94	A/A	Syn	Coding region
mtbs0377014_T	377014	42	C	T	747	Rv0307c		CTG/CTA	14	L/L	Syn	Coding region
mtbs0379528_T	379528	357	G	T	766	Rv0311		GAG/GAT	119	E/D	Nonsyn	Coding region
mtbs0383716_T	383716	115	C	T	905	Rv0315		CCG/TCG	39	P/S	Nonsyn	Coding region
mtbs0384380_C	384380	779	A	C	1943	Rv0315		AAG/ACG	260	K/T	Nonsyn	Coding region
mtbs0386432_G	386432	668	C	G	2061	Rv0318c		GGG/GCG	223	G/A	Nonsyn	Coding region
mtbs0390828_C	390828	424	T	C	2118	Rv0323c		AGT/GGT	142	S/G	Nonsyn	Coding region
mtbs0391853_G	391853	502	A	G	1451	Rv0324		ACT/GCT	168	T/A	Nonsyn	Coding region
mtbs0392261_C	392261	223	T	C	981	Rv0325		TAG/CAG	75	Stop/Q	Nonsyn	Coding region
mtbs0396199_C	396199	396199	T	C	827
mtbs0403980_A	403980	1862	G	A	1953	Rv0338c		GCC/GTC	621	A/V	Nonsyn	Coding region
mtbs0404326_C	404326	1516	T	C	1794	Rv0338c		AGG/GGG	506	R/G	Nonsyn	Coding region
mtbs0407167_T	407167	1282	C	T	64	Rv0339c		GCA/ACA	428	A/T	Nonsyn	Coding region
mtbs0414486_T	414486	456	C	T	1948	Rv0344c	lpqJ	GAG/GAA	152	E/E	Syn	Coding region
mtbs0420008_G	420008	174	A	G	1910	Rv0350	dnaK	GCA/GCG	58	A/A	Syn	Coding region
mtbs0428698_T	428698	5982	C	T	963	Rv0355c	PPE8	GCG/GCA	1994	A/A	Syn	Coding region
mtbs0432536_T	432536	2144	C	T	735	Rv0355c	PPE8	GGT/GAT	715	G/D	Nonsyn	Coding region
mtbs0441823_T	441823	477	C	T	799	Rv0363c	fba	GAG/GAA	159	E/E	Syn	Coding region
mtbs0445780_T	445780	746	C	T	1030	Rv0368c		CGT/CAT	249	R/H	Nonsyn	Coding region
mtbs0454295_C	454295	78	T	C	2086	Rv0376c		CCA/CCG	26	P/P	Syn	Coding region
mtbs0454333_G	454333	40	T	G	981	Rv0376c		ACG/CCG	14	T/P	Nonsyn	Coding region
mtbs0456594_C	456594	226	T	C	831	Rv0380c		ATG/GTG	76	M/V	Nonsyn	Coding region
mtbs0457452_G	457452	372	T	G	1926	Rv0381c		ACA/ACC	124	T/T	Syn	Coding region
mtbs0459399_C	459399	459399	A	C	2143
mtbs0460413_T	460413	1590	C	T	753	Rv0384c	clpB	AAG/AAA	530	K/K	Syn	Coding region
mtbs0465300_T	465300	1890	C	T	843	Rv0386		TTC/TTT	630	F/F	Syn	Coding region
mtbs0467516_C	467516	486	G	C	2237	Rv0388c	PPE9	TCC/TCG	162	S/S	Syn	Coding region
mtbs0467526_G	467526	476	C	G	2200	Rv0388c	PPE9	GGG/GCG	159	G/A	Nonsyn	Coding region
mtbs0467546_C	467546	456	G	C	2163	Rv0388c	PPE9	GAC/GAG	152	D/E	Nonsyn	Coding region
mtbs0467557_C	467557	445	A	C	2147	Rv0388c	PPE9	TTG/GTG	149	L/V	Nonsyn	Coding region
mtbs0467564_C	467564	438	A	C	2138	Rv0388c	PPE9	CAT/CAG	146	H/Q	Nonsyn	Coding region
mtbs0467585_C	467585	417	G	C	2105	Rv0388c	PPE9	CAC/CAG	139	H/Q	Nonsyn	Coding region
mtbs0467590_C	467590	412	T	C	2100	Rv0388c	PPE9	ACG/GCG	138	T/A	Nonsyn	Coding region
mtbs0467621_G	467621	381	T	G	2086	Rv0388c	PPE9	GGA/GGC	127	G/G	Syn	Coding region
mtbs0467638_T	467638	364	G	T	2090	Rv0388c	PPE9	CAG/AAG	122	Q/K	Nonsyn	Coding region
mtbs0475178_C	475178	239	T	C	2049	Rv0395		GTC/GCC	80	V/A	Nonsyn	Coding region
mtbs0477234_G	477234	87	T	G	866	Rv0398c		GAA/GAC	29	E/D	Nonsyn	Coding region
mtbs0484005_T	484005	29	G	T	694	Rv0404	fadD30	CGT/CTT	10	R/L	Nonsyn	Coding region
mtbs0484596_T	484596	620	C	T	745	Rv0404	fadD30	CCG/CTG	207	P/L	Nonsyn	Coding region
mtbs0489935_C	489935	771	G	C	1718	Rv0406c		ACC/ACG	257	T/T	Syn	Coding region
mtbs0491742_C	491742	960	T	C	945	Rv0407	fgd1	TTT/TTC	320	F/F	Syn	Coding region
mtbs0492150_C	492150	365	G	C	998	Rv0408	pta	GGC/GCC	122	G/A	Nonsyn	Coding region
mtbs0497491_A	497491	810	G	A	785	Rv0411c	glnH	GAC/GAT	270	D/D	Syn	Coding region
mtbs0498531_G	498531	1089	A	G	1034	Rv0412c		GCT/GCC	363	A/A	Syn	Coding region
mtbs0498557_A	498557	1063	C	A	1946	Rv0412c		GAC/TAC	355	D/Y	Nonsyn	Coding region
mtbs0502589_G	502589	224	C	G	2050	Rv0417	thiG	TCC/TGC	75	S/C	Nonsyn	Coding region
mtbs0503354_C	503354	503354	G	C	1834
mtbs0505974_A	505974	889	G	A	1034	Rv0419	lpqM	GCG/ACG	297	A/T	Nonsyn	Coding region
mtbs0513257_C	513257	2065	T	C	1934	Rv0425c	ctpH	ATG/GTG	689	M/V	Nonsyn	Coding region
mtbs0518987_T	518987	255	C	T	880	Rv0430		CGC/CGT	85	R/R	Syn	Coding region
mtbs0524891_A	524891	500	C	A	1262	Rv0436c	pssA	GGC/GTC	167	G/V	Nonsyn	Coding region
mtbs0533547_G	533547	243	C	G	812	Rv0444c	rskA	GAG/GAC	81	E/D	Nonsyn	Coding region
mtbs0541201_G	541201	291	A	G	1821	Rv0450c	mmpL4	CTT/CTC	97	L/L	Syn	Coding region
mtbs0542014_G	542014	542014	C	G	717
mtbs0542514_G	542514	373	C	G	743	Rv0452		CAT/GAT	125	H/D	Nonsyn	Coding region
mtbs0551525_C	551525	328	A	C	1949	Rv0459		AGA/CGA	110	R/R	Syn	Coding region
mtbs0555366_T	555366	941	C	T	534	Rv0465c		CGG/CAG	314	R/Q	Nonsyn	Coding region
mtbs0555991_G	555991	316	A	G	1122	Rv0465c		TGC/CGC	106	C/R	Nonsyn	Coding region
mtbs0560615_C	560615	728	A	C	64	Rv0469	umaA	GAG/GCG	243	E/A	Nonsyn	Coding region
mtbs0561776_T	561776	561776	C	T	722
mtbs0561777_T	561777	561777	C	T	719
mtbs0565655_G	565655	565655	A	G	1201
mtbs0572591_T	572591	882	C	T	882	Rv0483	lprQ	GAC/GAT	294	D/D	Syn	Coding region
mtbs0573262_G	573262	540	A	G	2013	Rv0484c		GGT/GGC	180	G/G	Syn	Coding region
mtbs0575907_T	575907	560	C	T	862	Rv0486	mshA	GCA/GTA	187	A/V	Nonsyn	Coding region
mtbs0583171_C	583171	208	A	C	879	Rv0492c		TCG/GCG	70	S/A	Nonsyn	Coding region
mtbs0584171_C	584171	520	T	C	1042	Rv0493c		AGT/GGT	174	S/G	Nonsyn	Coding region
mtbs0590436_C	590436	354	T	C	1962	Rv0500	proC	GCT/GCC	118	A/A	Syn	Coding region
mtbs0597816_G	597816	618	A	G	1714	Rv0507	mmpL2	GCA/GCG	206	A/A	Syn	Coding region
mtbs0598475_A	598475	1277	G	A	1948	Rv0507	mmpL2	CGC/CAC	426	R/H	Nonsyn	Coding region
mtbs0599868_G	599868	2670	A	G	955	Rv0507	mmpL2	CGA/CGG	890	R/R	Syn	Coding region
mtbs0605150_A	605150	549	G	A	749	Rv0512	hemB	CGG/CGA	183	R/R	Syn	Coding region
mtbs0610120_G	610120	610120	T	G	1890
mtbs0611048_G	611048	611048	T	G	736
mtbs0620625_G	620625	735	A	G	760	Rv0529	ccsA	ATA/ATG	245	I/M	Nonsyn	Coding region
mtbs0623472_G	623472	680	A	G	2337	Rv0532	PE_PGRS6	GAC/GGC	227	D/G	Nonsyn	Coding region
mtbs0623508_G	623508	716	C	G	2379	Rv0532	PE_PGRS6	GCC/GGC	239	A/G	Nonsyn	Coding region
mtbs0627485_A	627485	238	G	A	926	Rv0536	galE3	GTC/ATC	80	V/I	Nonsyn	Coding region
mtbs0630722_C	630722	683	G	C	2092	Rv0538		CGG/CCG	228	R/P	Nonsyn	Coding region
mtbs0637319_A	637319	145	G	A	1727	Rv0545c	pitA	CCT/TCT	49	P/S	Nonsyn	Coding region
mtbs0640954_G	640954	640954	A	G	744
mtbs0648002_G	648002	44	T	G	1807	Rv0556		CTC/CGC	15	L/R	Nonsyn	Coding region
mtbs0648856_C	648856	321	T	C	1022	Rv0557	mgtA	GGT/GGC	107	G/G	Syn	Coding region
mtbs0655986_G	655986	655986	T	G	949
mtbs0657081_T	657081	390	C	T	869	Rv0565c		GTG/GTA	130	V/V	Syn	Coding region
mtbs0657142_T	657142	329	C	T	750	Rv0565c		CGC/CAC	110	R/H	Nonsyn	Coding region
mtbs0659341_C	659341	659341	T	C	1088
mtbs0662911_C	662911	1617	T	C	1114	Rv0570	nrdZ	GCT/GCC	539	A/A	Syn	Coding region
mtbs0665293_G	665293	91	A	G	1727	Rv0572c		TTC/CTC	31	F/L	Nonsyn	Coding region
mtbs0669033_A	669033	713	T	A	752	Rv0575c		GAC/GTC	238	D/V	Nonsyn	Coding region
mtbs0669398_C	669398	348	T	C	1985	Rv0575c		CAA/CAG	116	Q/Q	Syn	Coding region
mtbs0670545_A	670545	698	G	A	1204	Rv0576		CGC/CAC	233	R/H	Nonsyn	Coding region
mtbs0683829_T	683829	444	C	T	790	Rv0585c		GCG/GCA	148	A/A	Syn	Coding region
mtbs0685461_G	685461	333	C	G	2142	Rv0587	yrbE2A	GCC/GCG	111	A/A	Syn	Coding region
mtbs0685608_C	685608	480	T	C	1810	Rv0587	yrbE2A	CTT/CTC	160	L/L	Syn	Coding region
mtbs0686972_C	686972	152	T	C	1843	Rv0589	mce2A	TTC/TCC	51	F/S	Nonsyn	Coding region
mtbs0690450_C	690450	1392	A	C	1202	Rv0591	mce2C	GCA/GCC	464	A/A	Syn	Coding region
mtbs0690465_G	690465	1407	T	G	2222	Rv0591	mce2C	CTT/CTG	469	L/L	Syn	Coding region
mtbs0694531_G	694531	1295	A	G	842	Rv0594	mce2F	AAC/AGC	432	N/S	Nonsyn	Coding region
mtbs0696917_T	696917	696917	G	T	739
mtbs0698968_A	698968	27	G	A	2167	Rv0601c		GGC/GGT	9	G/G	Syn	Coding region
mtbs0699840_C	699840	699840	A	C	748
mtbs0707334_C	707334	2182	T	C	910	Rv0613c		ACC/GCC	728	T/A	Nonsyn	Coding region
mtbs0712693_G	712693	520	A	G	1433	Rv0619	galTb	ACC/GCC	174	T/A	Nonsyn	Coding region
mtbs0721373_G	721373	360	T	G	841	Rv0629c	recD	GAA/GAC	120	E/D	Nonsyn	Coding region
mtbs0725190_A	725190	3117	G	A	1003	Rv0631c	recC	TTC/TTT	1039	F/F	Syn	Coding region
mtbs0754186_G	754186	224	A	G	2140	Rv0658c		CTC/CCC	75	L/P	Nonsyn	Coding region
mtbs0757139_A	757139	1003	C	A	797	Rv0663	atsD	CGC/AGC	335	R/S	Nonsyn	Coding region
mtbs0757182_G	757182	1046	A	G	1003	Rv0663	atsD	GAC/GGC	349	D/G	Nonsyn	Coding region
mtbs0761155_T	761155	1349	C	T	525	Rv0667	rpoB	TCG/TTG	450	S/L	Nonsyn	Coding region
mtbs0763031_C	763031	3225	T	C	972	Rv0667	rpoB	GCT/GCC	1075	A/A	Syn	Coding region
mtbs0765462_G	765462	2093	A	G	4	Rv0668	rpoC	AAC/AGC	698	N/S	Nonsyn	Coding region
mtbs0767414_A	767414	767414	G	A	1330
mtbs0767670_C	767670	767670	T	C	64
mtbs0773497_A	773497	375	C	A	801	Rv0673	echA4	TTC/TTA	125	F/L	Nonsyn	Coding region
mtbs0775639_C	775639	2842	T	C	2135	Rv0676c	mmpL5	ATT/GTT	948	I/V	Nonsyn	Coding region
mtbs0776100_A	776100	2381	G	A	993	Rv0676c	mmpL5	ACC/ATC	794	T/I	Nonsyn	Coding region
mtbs0776182_T	776182	2299	C	T	728	Rv0676c	mmpL5	GAC/AAC	767	D/N	Nonsyn	Coding region
mtbs0779615_C	779615	426	G	C	764	Rv0679c		AAC/AAG	142	N/K	Nonsyn	Coding region
mtbs0781395_C	781395	781395	T	C	1963
mtbs0781687_G	781687	128	A	G	322	Rv0682	rpsL	AAG/AGG	43	K/R	Nonsyn	Coding region
mtbs0791249_T	791249	418	C	T	720	Rv0691c		GCC/ACC	140	A/T	Nonsyn	Coding region
mtbs0797736_T	797736	804	C	T	753	Rv0697		CTC/CTT	268	L/L	Syn	Coding region
mtbs0798355_C	798355	1423	G	C	734	Rv0697		GCC/CCC	475	A/P	Nonsyn	Coding region
mtbs0811753_T	811753	12	C	T	756	Rv0715	rplX	CAC/CAT	4	H/H	Syn	Coding region
mtbs0820483_T	820483	17	G	T	1832	Rv0727c	fucA	GCC/GAC	6	A/D	Nonsyn	Coding region
mtbs0820752_T	820752	725	C	T	1061	Rv0728c	serA2	CGC/CAC	242	R/H	Nonsyn	Coding region
mtbs0835611_T	835611	458	C	T	786	Rv0745		ACG/ATG	153	T/M	Nonsyn	Coding region
mtbs0836272_G	836272	572	A	G	1989	Rv0746	PE_PGRS9	GAG/GGG	191	E/G	Nonsyn	Coding region
mtbs0836291_G	836291	591	A	G	2013	Rv0746	PE_PGRS9	GGA/GGG	197	G/G	Syn	Coding region
mtbs0836426_C	836426	726	A	C	1184	Rv0746	PE_PGRS9	CTA/CTC	242	L/L	Syn	Coding region
mtbs0838990_G	838990	540	C	G	1697	Rv0747	PE_PGRS10	GCC/GCG	180	A/A	Syn	Coding region
mtbs0840496_G	840496	2046	C	G	1770	Rv0747	PE_PGRS10	GGC/GGG	682	G/G	Syn	Coding region
mtbs0840794_G	840794	2344	A	G	850	Rv0747	PE_PGRS10	AGC/GGC	782	S/G	Nonsyn	Coding region
mtbs0840795_C	840795	2345	G	C	856	Rv0747	PE_PGRS10	AGC/ACC	782	S/T	Nonsyn	Coding region
mtbs0841764_C	841764	111	G	C	1731	Rv0749A		ACC/ACG	37	T/T	Syn	Coding region
mtbs0842030_T	842030	842030	C	T	717
mtbs0843909_G	843909	506	A	G	65	Rv0752c	fadE9	GTG/GCG	169	V/A	Nonsyn	Coding region
mtbs0852910_T	852910	515	C	T	2089	Rv0758	phoR	CCC/CTC	172	P/L	Nonsyn	Coding region
mtbs0857696_G	857696	342	A	G	1768	Rv0764c	cyp51	GCT/GCC	114	A/A	Syn	Coding region
mtbs0861216_G	861216	305	T	G	796	Rv0768	aldA	CTC/CGC	102	L/R	Nonsyn	Coding region
mtbs0866051_A	866051	1339	G	A	797	Rv0773c	ggtA	CGC/TGC	447	R/C	Nonsyn	Coding region
mtbs0876141_T	876141	1410	G	T	835	Rv0782	ptrBb	ACG/ACT	470	T/T	Syn	Coding region
mtbs0880562_T	880562	1223	G	T	1829	Rv0785		TGC/TTC	408	C/F	Nonsyn	Coding region
mtbs0882257_C	882257	799	T	C	1975	Rv0787		TAC/CAC	267	Y/H	Nonsyn	Coding region
mtbs0892272_A	892272	1002	G	A	532	Rv0799c		CCC/CCT	334	P/P	Syn	Coding region
mtbs0892416_T	892416	858	C	T	744	Rv0799c		GTG/GTA	286	V/V	Syn	Coding region
mtbs0893733_G	893733	416	T	G	2216	Rv0800	pepC	CTG/CGG	139	L/R	Nonsyn	Coding region
mtbs0900221_C	900221	1110	T	C	1771	Rv0806c	cpsY	GTA/GTG	370	V/V	Syn	Coding region
mtbs0903537_T	903537	1427	G	T	940	Rv0808	purF	CGG/CTG	476	R/L	Nonsyn	Coding region
mtbs0903550_C	903550	1440	T	C	1986	Rv0808	purF	GCT/GCC	480	A/A	Syn	Coding region
mtbs0903913_C	903913	189	T	C	2061	Rv0809	purM	GGT/GGC	63	G/G	Syn	Coding region
mtbs0906857_G	906857	435	A	G	2136	Rv0812		ATA/ATG	145	I/M	Nonsyn	Coding region
mtbs0908186_C	908186	298	T	C	853	Rv0814c	sseC2	ACC/GCC	100	T/A	Nonsyn	Coding region
mtbs0909166_T	909166	153	C	T	713	Rv0815c	cysA2	CTG/CTA	51	L/L	Syn	Coding region
mtbs0919351_C	919351	203	A	C	749	Rv0825c		TTC/TGC	68	F/C	Nonsyn	Coding region
mtbs0921813_G	921813	239	C	G	1957	Rv0829		GCA/GGA	80	A/G	Nonsyn	Coding region
mtbs0925453_T	925453	93	C	T	995	Rv0833	PE_PGRS13	GCC/GCT	31	A/A	Syn	Coding region
mtbs0931123_C	931123	171	T	C	959	Rv0835	lpqQ	TAT/TAC	57	Y/Y	Syn	Coding region
mtbs0932280_C	932280	653	T	C	1087	Rv0836c		TAG/TGG	218	Stop/W	Nonsyn	Coding region
mtbs0940602_G	940602	505	C	G	804	Rv0844c	narL	GGT/CGT	169	G/R	Nonsyn	Coding region
mtbs0941845_A	941845	656	C	A	1063	Rv0845		GCG/GAG	219	A/E	Nonsyn	Coding region
mtbs0945214_A	945214	277	G	A	1846	Rv0848	cysK2	GGT/AGT	93	G/S	Nonsyn	Coding region
mtbs0949535_C	949535	1584	T	C	1995	Rv0853c	pdc	GCA/GCG	528	A/A	Syn	Coding region
mtbs0951702_T	951702	71	C	T	755	Rv0855	far	GCC/GTC	24	A/V	Nonsyn	Coding region
mtbs0954468_G	954468	453	C	G	831	Rv0858c	dapC	GCG/GCC	151	A/A	Syn	Coding region
mtbs0955524_G	955524	448	A	G	2040	Rv0859	fadA	AGC/GGC	150	S/G	Nonsyn	Coding region
mtbs0957117_C	957117	825	T	C	1467	Rv0860	fadB	GAT/GAC	275	D/D	Syn	Coding region
mtbs0960367_G	960367	2246	A	G	1062	Rv0862c		TTG/TCG	749	L/S	Nonsyn	Coding region
mtbs0979704_C	979704	343	G	C	2185	Rv0881		GGC/CGC	115	G/R	Nonsyn	Coding region
mtbs0986463_C	986463	986463	G	C	1826
mtbs0990001_C	990001	2596	G	C	1933	Rv0890c		CCC/GCC	866	P/A	Nonsyn	Coding region
mtbs0993346_C	993346	110	A	C	1798	Rv0891c		GTT/GGT	37	V/G	Nonsyn	Coding region
mtbs1011511_C	1011511	1376	A	C	816	Rv0907		TAC/TCC	459	Y/S	Nonsyn	Coding region
mtbs1020942_G	1020942	388	T	G	538	Rv0915c	PPE14	AGT/CGT	130	S/R	Nonsyn	Coding region
mtbs1022003_C	1022003	1022003	A	C	723
mtbs1025106_C	1025106	423	T	C	1914	Rv0919		TTT/TTC	141	F/F	Syn	Coding region
mtbs1028217_A	1028217	533	G	A	747	Rv0922		GGC/GAC	178	G/D	Nonsyn	Coding region
mtbs1034758_T	1034758	1034758	C	T	734
mtbs1037012_C	1037012	14	T	C	2007	Rv0930	pstA1	ATG/ACG	5	M/T	Nonsyn	Coding region
mtbs1037911_T	1037911	913	C	T	2048	Rv0930	pstA1	CGA/TGA	305	R/Stop	Nonsyn	Coding region
mtbs1040050_T	1040050	999	C	T	104	Rv0932c	pstS2	GCG/GCA	333	A/A	Syn	Coding region
mtbs1040251_A	1040251	798	C	A	785	Rv0932c	pstS2	CCG/CCT	266	P/P	Syn	Coding region
mtbs1047165_C	1047165	1030	T	C	1762	Rv0938	ligD	TGC/CGC	344	C/R	Nonsyn	Coding region
mtbs1054784_G	1054784	538	C	G	973	Rv0945		CGC/GGC	180	R/G	Nonsyn	Coding region
mtbs1066921_T	1066921	844	G	T	534	Rv0955		GCC/TCC	282	A/S	Nonsyn	Coding region
mtbs1068151_C	1068151	591	T	C	2185	Rv0956	purN	CAT/CAC	197	H/H	Syn	Coding region
mtbs1068432_G	1068432	228	A	G	1889	Rv0957	purH	CCA/CCG	76	P/P	Syn	Coding region
mtbs1070702_C	1070702	820	T	C	1887	Rv0958		TCC/CCC	274	S/P	Nonsyn	Coding region
mtbs1074558_A	1074558	557	G	A	2132	Rv0962c	lprP	CCC/CTC	186	P/L	Nonsyn	Coding region
mtbs1075279_C	1075279	1075279	T	C	1721
mtbs1076309_T	1076309	370	G	T	1986	Rv0964c		CCT/ACT	124	P/T	Nonsyn	Coding region
mtbs1076880_T	1076880	318	C	T	779	Rv0965c		GCG/GCA	106	A/A	Syn	Coding region
mtbs1077312_G	1077312	524	A	G	2028	Rv0966c		GTG/GCG	175	V/A	Nonsyn	Coding region
mtbs1077626_A	1077626	210	C	A	64	Rv0966c		GGG/GGT	70	G/G	Syn	Coding region
mtbs1079927_A	1079927	1185	C	A	2133	Rv0969	ctpV	ACC/ACA	395	T/T	Syn	Coding region
mtbs1080192_A	1080192	1450	G	A	1159	Rv0969	ctpV	GAT/AAT	484	D/N	Nonsyn	Coding region
mtbs1081681_C	1081681	630	T	C	2031	Rv0970		GTT/GTC	210	V/V	Syn	Coding region
mtbs1087193_C	1087193	153	G	C	1875	Rv0974c	accD2	AAC/AAG	51	N/K	Nonsyn	Coding region
mtbs1093406_G	1093406	951	A	G	2028	Rv0978c	PE_PGRS17	GTT/GTC	317	V/V	Syn	Coding region
mtbs1095644_T	1095644	808	C	T	1126	Rv0980c	PE_PGRS18	GCG/ACG	270	A/T	Nonsyn	Coding region
mtbs1096235_G	1096235	217	C	G	173	Rv0980c	PE_PGRS18	GAA/CAA	73	E/Q	Nonsyn	Coding region
mtbs1096239_A	1096239	213	G	A	155	Rv0980c	PE_PGRS18	TAC/TAT	71	Y/Y	Syn	Coding region
mtbs1096299_G	1096299	153	C	G	1070	Rv0980c	PE_PGRS18	GCG/GCC	51	A/A	Syn	Coding region
mtbs1096398_T	1096398	54	C	T	1542	Rv0980c	PE_PGRS18	GCG/GCA	18	A/A	Syn	Coding region
mtbs1096508_G	1096508	1096508	C	G	1383
mtbs1096510_C	1096510	1096510	T	C	1391
mtbs1096567_G	1096567	1096567	A	G	993
mtbs1096633_G	1096633	1096633	T	G	1794
mtbs1097220_T	1097220	399	C	T	904	Rv0981	mprA	TCC/TCT	133	S/S	Syn	Coding region
mtbs1097442_T	1097442	621	C	T	770	Rv0981	mprA	GAC/GAT	207	D/D	Syn	Coding region
mtbs1098523_A	1098523	1016	T	A	998	Rv0982	mprB	CTT/CAT	339	L/H	Nonsyn	Coding region
mtbs1099058_A	1099058	1099058	G	A	813
mtbs1100234_C	1100234	1169	T	C	1937	Rv0983	pepD	CTG/CCG	390	L/P	Nonsyn	Coding region
mtbs1102117_A	1102117	315	G	A	743	Rv0986		GTG/GTA	105	V/V	Syn	Coding region
mtbs1102646_A	1102646	105	G	A	756	Rv0987		GCG/GCA	35	A/A	Syn	Coding region
mtbs1105686_G	1105686	571	C	G	714	Rv0988		CTG/GTG	191	L/V	Nonsyn	Coding region
mtbs1105687_C	1105687	572	T	C	715	Rv0988		CTG/CCG	191	L/P	Nonsyn	Coding region
mtbs1106422_C	1106422	961	T	C	1708	Rv0989c	grcC2	ATA/GTA	321	I/V	Nonsyn	Coding region
mtbs1107940_C	1107940	160	A	C	1038	Rv0990c		TCC/GCC	54	S/A	Nonsyn	Coding region
mtbs1108521_A	1108521	1108521	G	A	709
mtbs1109975_G	1109975	704	A	G	1920	Rv0993	galU	CAG/CGG	235	Q/R	Nonsyn	Coding region
mtbs1111678_A	1111678	67	G	A	801	Rv0995	rimJ	GGC/AGC	23	G/S	Nonsyn	Coding region
mtbs1126889_C	1126889	115	G	C	2001	Rv1007c	metS	CGC/GGC	39	R/G	Nonsyn	Coding region
mtbs1127493_C	1127493	405	T	C	773	Rv1008	tatD	AAT/AAC	135	N/N	Syn	Coding region
mtbs1127648_A	1127648	560	C	A	2003	Rv1008	tatD	ACC/AAC	187	T/N	Nonsyn	Coding region
mtbs1144585_G	1144585	22	A	G	993	Rv1023	eno	AGG/GGG	8	R/G	Nonsyn	Coding region
mtbs1145736_A	1145736	1173	T	A	63	Rv1023	eno	GCT/GCA	391	A/A	Syn	Coding region
mtbs1145848_C	1145848	1285	A	C	797	Rv1023	eno	AAA/CAA	429	K/Q	Nonsyn	Coding region
mtbs1148259_G	1148259	1148259	A	G	966
mtbs1148930_T	1148930	178	C	T	760	Rv1027c	kdpE	GGT/AGT	60	G/S	Nonsyn	Coding region
mtbs1149551_T	1149551	2136	C	T	1819	Rv1028c	kdpD	GAG/GAA	712	E/E	Syn	Coding region
mtbs1150585_A	1150585	1102	G	A	2193	Rv1028c	kdpD	CCC/TCC	368	P/S	Nonsyn	Coding region
mtbs1151054_G	1151054	633	C	G	865	Rv1028c	kdpD	TCG/TCC	211	S/S	Syn	Coding region
mtbs1151304_A	1151304	383	C	A	690	Rv1028c	kdpD	CGC/CTC	128	R/L	Nonsyn	Coding region
mtbs1152701_T	1152701	690	C	T	65	Rv1029	kdpA	ATC/ATT	230	I/I	Syn	Coding region
mtbs1159808_T	1159808	254	C	T	63	Rv1035c		CGG/CAG	85	R/Q	Nonsyn	Coding region
mtbs1160770_A	1160770	59	T	A	917	Rv1037c	esxI	CAG/CTG	20	Q/L	Nonsyn	Coding region
mtbs1163134_C	1163134	243	T	C	1908	Rv1040c	PE8	GGA/GGG	81	G/G	Syn	Coding region
mtbs1165114_T	1165114	322	C	T	245	Rv1041c		GAT/AAT	108	D/N	Nonsyn	Coding region
mtbs1168776_G	1168776	453	T	G	792	Rv1046c		AGA/AGC	151	R/S	Nonsyn	Coding region
mtbs1172085_A	1172085	69	C	A	735	Rv1048c		GAG/GAT	23	E/D	Nonsyn	Coding region
mtbs1173750_T	1173750	870	G	T	926	Rv1050		GCG/GCT	290	A/A	Syn	Coding region
mtbs1175343_T	1175343	1175343	C	T	768
mtbs1177157_A	1177157	230	G	A	715	Rv1054		GGC/GAC	77	G/D	Nonsyn	Coding region
mtbs1178116_C	1178116	489	T	C	1771	Rv1056		ACT/ACC	163	T/T	Syn	Coding region
mtbs1190093_C	1190093	332	A	C	1835	Rv1067c	PE_PGRS19	TTG/TGG	111	L/W	Nonsyn	Coding region
mtbs1197157_G	1197157	1197157	T	G	738
mtbs1200418_G	1200418	1200418	A	G	1695
mtbs1201581_C	1201581	815	A	C	818	Rv1076	lipU	CAG/CCG	272	Q/P	Nonsyn	Coding region
mtbs1208181_A	1208181	546	G	A	66	Rv1084		CTG/CTA	182	L/L	Syn	Coding region
mtbs1211369_C	1211369	775	A	C	1011	Rv1086		AGC/CGC	259	S/R	Nonsyn	Coding region
mtbs1215742_A	1215742	144	G	A	749	Rv1090	celA2b	CAG/CAA	48	Q/Q	Syn	Coding region
mtbs1215743_A	1215743	145	C	A	748	Rv1090	celA2b	CAG/AAG	49	Q/K	Nonsyn	Coding region
mtbs1217065_A	1217065	597	C	A	852	Rv1091	PE_PGRS22	GCC/GCA	199	A/A	Syn	Coding region
mtbs1218896_A	1218896	2428	G	A	844	Rv1091	PE_PGRS22	GGC/AGC	810	G/S	Nonsyn	Coding region
mtbs1220680_C	1220680	107	T	C	1955	Rv1093	glyA1	GTA/GCA	36	V/A	Nonsyn	Coding region
mtbs1224367_C	1224367	1224367	T	C	2137
mtbs1230778_A	1230778	194	G	A	943	Rv1102c	mazF3	ACC/ATC	65	T/I	Nonsyn	Coding region
mtbs1234971_T	1234971	490	C	T	50	Rv1108c	xseA	GCG/ACG	164	A/T	Nonsyn	Coding region
mtbs1248382_G	1248382	301	A	G	1056	Rv1125		AGC/GGC	101	S/G	Nonsyn	Coding region
mtbs1248936_C	1248936	855	G	C	1107	Rv1125		CCG/CCC	285	P/P	Syn	Coding region
mtbs1248978_C	1248978	897	T	C	2037	Rv1125		GCT/GCC	299	A/A	Syn	Coding region
mtbs1251199_T	1251199	206	C	T	1235	Rv1127c	ppdK	GGA/GAA	69	G/E	Nonsyn	Coding region
mtbs1252164_C	1252164	544	T	C	1229			TCG/CCG	182	S/P	Nonsyn	Repeat region
mtbs1254562_G	1254562	8	A	G	930	Rv1130	prpD	GAT/GGT	3	D/G	Nonsyn	Coding region
mtbs1265070_T	1265070	1265070	G	T	732
mtbs1281118_C	1281118	367	T	C	1925	Rv1154c		ACG/GCG	123	T/A	Nonsyn	Coding region
mtbs1281771_C	1281771	343	T	C	1022	Rv1155		TCG/CCG	115	S/P	Nonsyn	Coding region
mtbs1286766_C	1286766	172	G	C	761	Rv1160	mutT2	GGA/CGA	58	G/R	Nonsyn	Coding region
mtbs1288698_A	1288698	1371	G	A	769	Rv1161	narG	GGG/GGA	457	G/G	Syn	Coding region
mtbs1292102_G	1292102	1038	A	G	2088	Rv1162	narH	CCA/CCG	346	P/P	Syn	Coding region
mtbs1293333_G	1293333	536	C	G	797	Rv1163	narJ	CCG/CGG	179	P/R	Nonsyn	Coding region
mtbs1296834_C	1296834	683	A	C	65	Rv1166	lpqW	GAA/GCA	228	E/A	Nonsyn	Coding region
mtbs1299305_A	1299305	500	G	A	875	Rv1168c	PPE17	CCG/CTG	167	P/L	Nonsyn	Coding region
mtbs1306259_G	1306259	1968	A	G	1380	Rv1175c	fadH	GCT/GCC	656	A/A	Syn	Coding region
mtbs1307598_G	1307598	629	C	G	1892	Rv1175c	fadH	TGC/TCC	210	C/S	Nonsyn	Coding region
mtbs1313338_C	1313338	1313338	A	C	228
mtbs1315191_C	1315191	1467	A	C	2090	Rv1180	pks3	TAA/TAC	489	Stop/Y	Nonsyn	Coding region
mtbs1315884_A	1315884	651	G	A	2123	Rv1181	pks4	GCG/GCA	217	A/A	Syn	Coding region
mtbs1317655_T	1317655	2422	C	T	782	Rv1181	pks4	CTG/TTG	808	L/L	Syn	Coding region
mtbs1322741_G	1322741	1222	A	G	758	Rv1183	mmpL10	ACT/GCT	408	T/A	Nonsyn	Coding region
mtbs1327890_A	1327890	1416	G	A	1929	Rv1186c		GAC/GAT	472	D/D	Syn	Coding region
mtbs1328687_C	1328687	619	G	C	2128	Rv1186c		CCC/GCC	207	P/A	Nonsyn	Coding region
mtbs1336164_T	1336164	371	C	T	773	Rv1193	fadD36	CCG/CTG	124	P/L	Nonsyn	Coding region
mtbs1340208_A	1340208	860	G	A	914	Rv1196	PPE18	CGG/CAG	287	R/Q	Nonsyn	Coding region
mtbs1351172_G	1351172	1351172	A	G	988
mtbs1360209_C	1360209	1593	T	C	1988	Rv1217c		GCA/GCG	531	A/A	Syn	Coding region
mtbs1361190_A	1361190	612	G	A	973	Rv1217c		AGC/AGT	204	S/S	Syn	Coding region
mtbs1361285_T	1361285	517	C	T	812	Rv1217c		GCT/ACT	173	A/T	Nonsyn	Coding region
mtbs1362006_C	1362006	728	T	C	1203	Rv1218c		CAA/CGA	243	Q/R	Nonsyn	Coding region
mtbs1367484_G	1367484	22	T	G	961	Rv1224	tatB	TGG/GGG	8	W/G	Nonsyn	Coding region
mtbs1374065_C	1374065	133	T	C	2249	Rv1230c		AGC/GGC	45	S/G	Nonsyn	Coding region
mtbs1374201_G	1374201	1374201	A	G	735
mtbs1375044_G	1375044	1125	C	G	864	Rv1232c		GCG/GCC	375	A/A	Syn	Coding region
mtbs1375724_C	1375724	445	A	C	2158	Rv1232c		TGC/GGC	149	C/G	Nonsyn	Coding region
mtbs1382628_C	1382628	415	T	C	1906	Rv1239c	corA	AAA/GAA	139	K/E	Nonsyn	Coding region
mtbs1390527_G	1390527	2526	C	G	105	Rv1248c		TCG/TCC	842	S/S	Syn	Coding region
mtbs1390528_T	1390528	2525	G	T	104	Rv1248c		TCG/TAG	842	S/Stop	Nonsyn	Coding region
mtbs1390763_T	1390763	2290	C	T	967	Rv1248c		GTG/ATG	764	V/M	Nonsyn	Coding region
mtbs1393626_G	1393626	357	A	G	2073	Rv1249c		CTT/CTC	119	L/L	Syn	Coding region
mtbs1396922_C	1396922	2319	T	C	2051	Rv1251c		ACA/ACG	773	T/T	Syn	Coding region
mtbs1411210_G	1411210	780	T	G	2151	Rv1263	amiB2	GTT/GTG	260	V/V	Syn	Coding region
mtbs1413148_T	1413148	77	C	T	2029	RVnc0013	mcr11	GGC/GAC	26	G/D	Nonsyn	Non-coding RNA
mtbs1414021_T	1414021	1820	C	T	2008	Rv1266c	pknH	CGG/CAG	607	R/Q	Nonsyn	Coding region
mtbs1419658_T	1419658	91	C	T	63	Rv1270c	lprA	GCC/ACC	31	A/T	Nonsyn	Coding region
mtbs1428506_T	1428506	1093	G	T	512	Rv1278		GCC/TCC	365	A/S	Nonsyn	Coding region
mtbs1431097_T	1431097	1036	G	T	76	Rv1279		GAA/TAA	346	E/Stop	Nonsyn	Coding region
mtbs1440469_G	1440469	1563	C	G	1998	Rv1286	cysN	CCC/CCG	521	P/P	Syn	Coding region
mtbs1445781_G	1445781	54	A	G	1869	Rv1291c		GCT/GCC	18	A/A	Syn	Coding region
mtbs1446733_A	1446733	355	G	A	706	Rv1292	argS	GCC/ACC	119	A/T	Nonsyn	Coding region
mtbs1457144_T	1457144	580	C	T	2021	Rv1300	hemK	CGC/TGC	194	R/C	Nonsyn	Coding region
mtbs1468208_C	1468208	1298	A	C	1696	Rv1313c		CTG/CGG	433	L/R	Nonsyn	Coding region
mtbs1471659_T	1471659	41	C	T	1948	RVnc0021	mcr3	TCG/TTG	14	S/L	Nonsyn	Non-coding RNA
mtbs1477596_T	1477596	36	C	T	732	Rv1316c	ogt	GGG/GGA	12	G/G	Syn	Coding region
mtbs1479085_C	1479085	34	T	C	1032	Rv1317c	alkA	ATC/GTC	12	I/V	Nonsyn	Coding region
mtbs1480972_C	1480972	1530	T	C	1209	Rv1319c		GAA/GAG	510	E/E	Syn	Coding region
mtbs1482627_C	1482627	1591	T	C	2117	Rv1320c		ACG/GCG	531	T/A	Nonsyn	Coding region
mtbs1484708_C	1484708	430	A	C	2014	Rv1321		AGC/CGC	144	S/R	Nonsyn	Coding region
mtbs1488218_G	1488218	1748	C	G	64	Rv1325c	PE_PGRS24	GGT/GCT	583	G/A	Nonsyn	Coding region
mtbs1490905_G	1490905	1408	A	G	978	Rv1326c	glgB	TCT/CCT	470	S/P	Nonsyn	Coding region
mtbs1498951_T	1498951	239	G	T	879	Rv1329c	dinG	ACG/AAG	80	T/K	Nonsyn	Coding region
mtbs1499274_G	1499274	1286	C	G	2192	Rv1330c	pncB1	GGC/GCC	429	G/A	Nonsyn	Coding region
mtbs1523817_T	1523817	216	C	T	707	Rv1355c	moeY	CGG/CGA	72	R/R	Syn	Coding region
mtbs1526819_A	1526819	208	C	A	1722	Rv1358		CGG/AGG	70	R/R	Syn	Coding region
mtbs1533241_C	1533241	393	G	C	1685	Rv1361c	PPE19	ACC/ACG	131	T/T	Syn	Coding region
mtbs1533583_A	1533583	51	G	A	1739	Rv1361c	PPE19	TAC/TAT	17	Y/Y	Syn	Coding region
mtbs1536251_T	1536251	1394	G	T	2058	Rv1364c		GCG/GAG	465	A/E	Nonsyn	Coding region
mtbs1540141_C	1540141	505	T	C	995	Rv1367c		ATC/GTC	169	I/V	Nonsyn	Coding region
mtbs1540352_A	1540352	294	G	A	96	Rv1367c		CAC/CAT	98	H/H	Syn	Coding region
mtbs1541798_T	1541798	779	C	T	916	Rv1368	lprF	GCG/GTG	260	A/V	Nonsyn	Coding region
mtbs1544255_T	1544255	897	C	T	986	Rv1371		CGC/CGT	299	R/R	Syn	Coding region
mtbs1546703_T	1546703	692	C	T	1134	Rv1373		CCG/CTG	231	P/L	Nonsyn	Coding region
mtbs1547125_C	1547125	406	T	C	1841	Rv1374c		ACA/GCA	136	T/A	Nonsyn	Coding region
mtbs1552547_A	1552547	109	G	A	2066	Rv1378c		CGG/TGG	37	R/W	Nonsyn	Coding region
mtbs1556787_C	1556787	817	T	C	791	Rv1383	carA	TCG/CCG	273	S/P	Nonsyn	Coding region
mtbs1561939_C	1561939	171	G	C	878	Rv1387	PPE20	GAG/GAC	57	E/D	Nonsyn	Coding region
mtbs1563717_T	1563717	24	C	T	1767	Rv1388	mihF	GTC/GTT	8	V/V	Syn	Coding region
mtbs1567524_A	1567524	700	G	A	66	Rv1392	metK	GAA/AAA	234	E/K	Nonsyn	Coding region
mtbs1570566_A	1570566	404	C	A	1813	Rv1394c	cyp132	CGG/CTG	135	R/L	Nonsyn	Coding region
mtbs1573660_G	1573660	198	T	G	1926	Rv1396c	PE_PGRS25	AGA/AGC	66	R/S	Nonsyn	Coding region
mtbs1576481_G	1576481	316	T	G	792	Rv1400c	lipI	ACC/CCC	106	T/P	Nonsyn	Coding region
mtbs1576527_T	1576527	270	G	T	795	Rv1400c	lipI	TTC/TTA	90	F/L	Nonsyn	Coding region
mtbs1577241_A	1577241	312	G	A	841	Rv1401		CCG/CCA	104	P/P	Syn	Coding region
mtbs1588899_T	1588899	333	G	T	1926	Rv1412	ribC	GCG/GCT	111	A/A	Syn	Coding region
mtbs1593331_A	1593331	1593331	G	A	849
mtbs1594906_A	1594906	865	G	A	801	Rv1420	uvrC	GTC/ATC	289	V/I	Nonsyn	Coding region
mtbs1595342_C	1595342	1301	T	C	956	Rv1420	uvrC	GTG/GCG	434	V/A	Nonsyn	Coding region
mtbs1606673_T	1606673	288	G	T	815	Rv1430	PE16	GCG/GCT	96	A/A	Syn	Coding region
mtbs1608276_C	1608276	194	A	C	968	Rv1431		AAC/ACC	65	N/T	Nonsyn	Coding region
mtbs1609840_G	1609840	1758	A	G	1982	Rv1431		CCA/CCG	586	P/P	Syn	Coding region
mtbs1613035_C	1613035	1613035	T	C	1881
mtbs1616061_T	1616061	498	C	T	803	Rv1438	tpi	AGC/AGT	166	S/S	Syn	Coding region
mtbs1617302_T	1617302	85	G	T	765	Rv1439c		CTT/ATT	29	L/I	Nonsyn	Coding region
mtbs1618978_C	1618978	707	T	C	1061	Rv1441c	PE_PGRS26	GAT/GGT	236	D/G	Nonsyn	Coding region
mtbs1624791_G	1624791	575	C	G	2098	Rv1446c	opcA	CGA/CCA	192	R/P	Nonsyn	Coding region
mtbs1627351_C	1627351	730	T	C	1320	Rv1448c	tal	ACC/GCC	244	T/A	Nonsyn	Coding region
mtbs1630148_C	1630148	52	A	C	1796	Rv1449c	tkt	TAC/GAC	18	Y/D	Nonsyn	Coding region
mtbs1634418_T	1634418	210	C	T	727	Rv1450c	PE_PGRS27	GCG/GCA	70	A/A	Syn	Coding region
mtbs1634523_T	1634523	105	C	T	886	Rv1450c	PE_PGRS27	TCG/TCA	35	S/S	Syn	Coding region
mtbs1634541_G	1634541	87	A	G	535	Rv1450c	PE_PGRS27	AAT/AAC	29	N/N	Syn	Coding region
mtbs1634547_T	1634547	81	C	T	712	Rv1450c	PE_PGRS27	GCG/GCA	27	A/A	Syn	Coding region
mtbs1634548_A	1634548	80	G	A	709	Rv1450c	PE_PGRS27	GCG/GTG	27	A/V	Nonsyn	Coding region
mtbs1634550_A	1634550	78	G	A	722	Rv1450c	PE_PGRS27	GGC/GGT	26	G/G	Syn	Coding region
mtbs1634580_C	1634580	48	T	C	978	Rv1450c	PE_PGRS27	TTA/TTG	16	L/L	Syn	Coding region
mtbs1634581_G	1634581	47	A	G	976	Rv1450c	PE_PGRS27	TTA/TCA	16	L/S	Nonsyn	Coding region
mtbs1634586_C	1634586	42	T	C	986	Rv1450c	PE_PGRS27	GCA/GCG	14	A/A	Syn	Coding region
mtbs1634589_C	1634589	39	G	C	975	Rv1450c	PE_PGRS27	GCC/GCG	13	A/A	Syn	Coding region
mtbs1634592_G	1634592	36	C	G	978	Rv1450c	PE_PGRS27	GCG/GCC	12	A/A	Syn	Coding region
mtbs1634609_T	1634609	19	C	T	1181	Rv1450c	PE_PGRS27	GCC/ACC	7	A/T	Nonsyn	Coding region
mtbs1634610_T	1634610	18	C	T	1187	Rv1450c	PE_PGRS27	GTG/GTA	6	V/V	Syn	Coding region
mtbs1637172_G	1637171	1221	A	G	1			TTC/CTC	408	F/L	Nonsyn	Repeat region
mtbs1637178_C	1637178	1052	G	C	3	Rv1452c	PE_PGRS28	GCC/GGC	351	A/G	Nonsyn	Coding region
mtbs1637192_A	1637192	1038	G	A	609	Rv1452c	PE_PGRS28	GGC/GGT	346	G/G	Syn	Coding region
mtbs1637204_G	1637204	1026	A	G	606	Rv1452c	PE_PGRS28	GTT/GTC	342	V/V	Syn	Coding region
mtbs1637206_T	1637206	1024	C	T	10	Rv1452c	PE_PGRS28	GTT/ATT	342	V/I	Nonsyn	Coding region
mtbs1637207_A	1637207	1023	C	A	8	Rv1452c	PE_PGRS28	GGG/GGT	341	G/G	Syn	Coding region
mtbs1637210_G	1637210	1020	A	G	14	Rv1452c	PE_PGRS28	GGT/GGC	340	G/G	Syn	Coding region
mtbs1637214_T	1637214	1016	G	T	10	Rv1452c	PE_PGRS28	GCC/GAC	339	A/D	Nonsyn	Coding region
mtbs1637228_G	1637228	1002	A	G	240	Rv1452c	PE_PGRS28	GGT/GGC	334	G/G	Syn	Coding region
mtbs1637234_A	1637234	996	G	A	49	Rv1452c	PE_PGRS28	GGC/GGT	332	G/G	Syn	Coding region
mtbs1637249_A	1637249	981	G	A	67	Rv1452c	PE_PGRS28	GGC/GGT	327	G/G	Syn	Coding region
mtbs1637255_G	1637255	975	C	G	57	Rv1452c	PE_PGRS28	GGG/GGC	325	G/G	Syn	Coding region
mtbs1637258_C	1637258	972	T	C	65	Rv1452c	PE_PGRS28	GGA/GGG	324	G/G	Syn	Coding region
mtbs1637263_C	1637263	967	T	C	103	Rv1452c	PE_PGRS28	ACC/GCC	323	T/A	Nonsyn	Coding region
mtbs1637264_C	1637264	966	G	C	103	Rv1452c	PE_PGRS28	GGC/GGG	322	G/G	Syn	Coding region
mtbs1638364_T	1638364	29	C	T	756			CGA/CAA	10	R/Q	Nonsyn	Repeat region
mtbs1639594_A	1639594	1214	C	A	2064	Rv1453		CCA/CAA	405	P/Q	Nonsyn	Coding region
mtbs1643864_C	1643864	397	T	C	851	Rv1458c		ACC/GCC	133	T/A	Nonsyn	Coding region
mtbs1645802_C	1645802	337	T	C	1903	Rv1459c		AAA/GAA	113	K/E	Nonsyn	Coding region
mtbs1647436_A	1647436	448	G	A	748	Rv1461		GTA/ATA	150	V/I	Nonsyn	Coding region
mtbs1650072_G	1650072	547	A	G	2086	Rv1462		AAC/GAC	183	N/D	Nonsyn	Coding region
mtbs1651308_G	1651308	593	A	G	761	Rv1463		GAA/GGA	198	E/G	Nonsyn	Coding region
mtbs1669158_C	1669158	1669158	T	C	740
mtbs1676290_A	1676290	594	C	A	1782	Rv1486c		AAG/AAT	198	K/N	Nonsyn	Coding region
mtbs1684184_A	1684184	180	G	A	24	Rv1493	mutB	CCG/CCA	60	P/P	Syn	Coding region
mtbs1689349_T	1689349	572	C	T	1788	Rv1498c		CGC/CAC	191	R/H	Nonsyn	Coding region
mtbs1692141_C	1692141	252	A	C	1689	Rv1501		ATA/ATC	84	I/I	Syn	Coding region
mtbs1693561_G	1693561	638	A	G	1721	Rv1502		TAC/TGC	213	Y/C	Nonsyn	Coding region
mtbs1695796_T	1695796	151	C	T	750	Rv1505c		GCC/ACC	51	A/T	Nonsyn	Coding region
mtbs1697896_T	1697896	1697896	C	T	715
mtbs1698911_A	1698911	984	G	A	1917	Rv1508c		GGC/GGT	328	G/G	Syn	Coding region
mtbs1701215_T	1701215	1701215	C	T	737
mtbs1706119_C	1706119	477	T	C	1927	Rv1514c		TCA/TCG	159	S/S	Syn	Coding region
mtbs1706685_A	1706685	842	C	A	742	Rv1515c		GGA/GTA	281	G/V	Nonsyn	Coding region
mtbs1709432_T	1709432	562	C	T	1216	Rv1517		CTC/TTC	188	L/F	Nonsyn	Coding region
mtbs1711670_T	1711670	643	C	T	751	Rv1520		CGC/TGC	215	R/C	Nonsyn	Coding region
mtbs1713192_G	1713192	891	A	G	1322	Rv1521	fadD25	GTA/GTG	297	V/V	Syn	Coding region
mtbs1716472_G	1716472	1141	A	G	1046	Rv1522c	mmpL12	TCC/CCC	381	S/P	Nonsyn	Coding region
mtbs1722200_G	1722200	6210	C	G	801	Rv1527c	pks5	GTG/GTC	2070	V/V	Syn	Coding region
mtbs1722228_C	1722228	6182	A	C	680	Rv1527c	pks5	CTG/CGG	2061	L/R	Nonsyn	Coding region
mtbs1728837_G	1728837	1728837	A	G	1819
mtbs1733134_T	1733134	417	C	T	747	Rv1532c		CAG/CAA	139	Q/Q	Syn	Coding region
mtbs1733325_G	1733325	226	C	G	796	Rv1532c		GCT/CCT	76	A/P	Nonsyn	Coding region
mtbs1739559_C	1739559	3041	T	C	533	Rv1536	ileS	ATC/ACC	1014	I/T	Nonsyn	Coding region
mtbs1740771_C	1740771	916	A	C	505	Rv1537	dinX	ACC/CCC	306	T/P	Nonsyn	Coding region
mtbs1741352_T	1741352	841	C	T	835	Rv1538c	ansA	GGC/AGC	281	G/S	Nonsyn	Coding region
mtbs1752561_C	1752561	773	T	C	1850	Rv1548c	PPE21	GAC/GGC	258	D/G	Nonsyn	Coding region
mtbs1753483_C	1753483	1753483	T	C	527
mtbs1759252_T	1759252	1572	G	T	1860	Rv1552	frdA	TCG/TCT	524	S/S	Syn	Coding region
mtbs1760292_G	1760292	118	A	G	1910	Rv1554	frdC	ATG/GTG	40	M/V	Nonsyn	Coding region
mtbs1774659_T	1774659	1774659	C	T	723
mtbs1778430_C	1778430	572	T	C	2287	Rv1570	bioD	ATG/ACG	191	M/T	Nonsyn	Coding region
mtbs1789446_T	1789446	366	C	T	255			ACG/ACA	122	T/T	Syn	Repeat region
mtbs1789516_G	1789516	296	A	G	943			GTG/GCG	99	V/A	Nonsyn	Repeat region
mtbs1789564_T	1789564	248	C	T	1222			GGC/GAC	83	G/D	Nonsyn	Repeat region
mtbs1789565_A	1789565	247	C	A	1233			GGC/TGC	83	G/C	Nonsyn	Repeat region
mtbs1789650_T	1789650	162	C	T	1304			ACG/ACA	54	T/T	Syn	Repeat region
mtbs1789654_G	1789654	158	A	G	1309			TTG/TCG	53	L/S	Nonsyn	Repeat region
mtbs1789671_T	1789671	141	C	T	1373			ACG/ACA	47	T/T	Syn	Repeat region
mtbs1789675_C	1789675	137	A	C	1377			GTC/GGC	46	V/G	Nonsyn	Repeat region
mtbs1792777_C	1792777	964	T	C	1222	Rv1592c		ATT/GTT	322	I/V	Nonsyn	Coding region
mtbs1792778_C	1792778	963	T	C	1222	Rv1592c		GAA/GAG	321	E/E	Syn	Coding region
mtbs1797027_T	1797027	1223	C	T	116	Rv1595	nadB	ACC/ATC	408	T/I	Nonsyn	Coding region
mtbs1798355_A	1798355	62	G	A	1930	Rv1597		GGT/GAT	21	G/D	Nonsyn	Coding region
mtbs1803265_A	1803265	602	G	A	1972	Rv1602	hisH	AGC/AAC	201	S/N	Nonsyn	Coding region
mtbs1804409_A	1804409	371	C	A	1955	Rv1604	impA	CCA/CAA	124	P/Q	Nonsyn	Coding region
mtbs1811375_T	1811375	249	G	T	856	Rv1612	trpB	GGG/GGT	83	G/G	Syn	Coding region
mtbs1817976_T	1817976	362	A	T	2169	Rv1618	tesB1	CAC/CTC	121	H/L	Nonsyn	Coding region
mtbs1834177_C	1834177	636	A	C	737	Rv1630	rpsA	CGA/CGC	212	R/R	Syn	Coding region
mtbs1836286_C	1836286	1836286	G	C	2051
mtbs1839759_C	1839759	592	G	C	1054	Rv1634		GGG/CGG	198	G/R	Nonsyn	Coding region
mtbs1847919_G	1847919	540	C	G	1890	Rv1639c		ACG/ACC	180	T/T	Syn	Coding region
mtbs1849051_T	1849051	2985	C	T	766	Rv1640c	lysX	CCG/CCA	995	P/P	Syn	Coding region
mtbs1849609_C	1849609	2427	T	C	1059	Rv1640c	lysX	CGA/CGG	809	R/R	Syn	Coding region
mtbs1849934_G	1849934	2102	A	G	761	Rv1640c	lysX	ATT/ACT	701	I/T	Nonsyn	Coding region
mtbs1854300_C	1854300	695	T	C	2012	Rv1644	tsnR	CTG/CCG	232	L/P	Nonsyn	Coding region
mtbs1856777_C	1856777	4	G	C	2073	Rv1647		GCG/CCG	2	A/P	Nonsyn	Coding region
mtbs1859559_A	1859559	827	C	A	1015	Rv1649	pheS	GCC/GAC	276	A/D	Nonsyn	Coding region
mtbs1877744_C	1877744	2441	A	C	837	Rv1661	pks7	GAA/GCA	814	E/A	Nonsyn	Coding region
mtbs1884305_G	1884305	2602	T	G	64	Rv1662	pks8	TTC/GTC	868	F/V	Nonsyn	Coding region
mtbs1885385_G	1885385	3682	T	G	752	Rv1662	pks8	TTG/GTG	1228	L/V	Nonsyn	Coding region
mtbs1885772_A	1885772	4069	G	A	2021	Rv1662	pks8	GCC/ACC	1357	A/T	Nonsyn	Coding region
mtbs1887060_G	1887060	549	C	G	535	Rv1663	pks17	ACC/ACG	183	T/T	Syn	Coding region
mtbs1888373_C	1888373	348	T	C	759	Rv1664	pks9	GCT/GCC	116	A/A	Syn	Coding region
mtbs1892017_C	1892017	792	T	C	751	Rv1665	pks11	CAT/CAC	264	H/H	Syn	Coding region
mtbs1894422_G	1894422	921	A	G	1425	Rv1668c		GAT/GAC	307	D/D	Syn	Coding region
mtbs1897608_T	1897608	600	C	T	778	Rv1672c		TTG/TTA	200	L/L	Syn	Coding region
mtbs1901493_C	1901493	447	T	C	1997	Rv1676		AGT/AGC	149	S/S	Syn	Coding region
mtbs1902337_C	1902337	1902337	A	C	725
mtbs1906078_G	1906078	829	A	G	837	Rv1681	moeX	ACC/GCC	277	T/A	Nonsyn	Coding region
mtbs1907296_C	1907296	894	G	C	1901	Rv1682		GCG/GCC	298	A/A	Syn	Coding region
mtbs1916137_G	1916137	189	A	G	1382	Rv1691		CTA/CTG	63	L/L	Syn	Coding region
mtbs1917972_G	1917972	33	A	G	2102	Rv1694	tlyA	CTA/CTG	11	L/L	Syn	Coding region
mtbs1931179_A	1931179	278	C	A	2019	Rv1704c	cycA	CGG/CTG	93	R/L	Nonsyn	Coding region
mtbs1931718_C	1931718	937	G	C	1132	Rv1705c	PPE22	CTG/GTG	313	L/V	Nonsyn	Coding region
mtbs1933988_A	1933988	1933988	G	A	1819
mtbs1944107_G	1944107	532	A	G	1891	Rv1716		AGT/GGT	178	S/G	Nonsyn	Coding region
mtbs1944402_C	1944402	827	T	C	2053	Rv1716		GTC/GCC	276	V/A	Nonsyn	Coding region
mtbs1950767_C	1950767	285	T	C	1834	Rv1724c		AAA/AAG	95	K/K	Syn	Coding region
mtbs1955941_C	1955941	1305	G	C	866	Rv1730c		GAC/GAG	435	D/E	Nonsyn	Coding region
mtbs1960284_A	1960284	204	C	A	1919	Rv1733c		CAG/CAT	68	Q/H	Nonsyn	Coding region
mtbs1961735_G	1961735	54	A	G	781	Rv1735c		GCT/GCC	18	A/A	Syn	Coding region
mtbs1967237_A	1967237	401	C	A	1918	Rv1739c		CGA/CTA	134	R/L	Nonsyn	Coding region
mtbs1967543_A	1967543	95	C	A	818	Rv1739c		GGC/GTC	32	G/V	Nonsyn	Coding region
mtbs1971725_C	1971725	267	G	C	1112	Rv1745c	idi	CGC/CGG	89	R/R	Syn	Coding region
mtbs1980652_T	1980652	1032	G	T	830	Rv1751		CCG/CCT	344	P/P	Syn	Coding region
mtbs1983313_G	1983313	42	T	G	1845			GAA/GAC	14	E/D	Nonsyn	Repeat region
mtbs2000234_T	2000234	161	C	T	66	Rv1767		GCG/GTG	54	A/V	Nonsyn	Coding region
mtbs2003827_C	2003827	1202	A	C	886	Rv1769		GAC/GCC	401	D/A	Nonsyn	Coding region
mtbs2009848_G	2009848	677	C	G	535	Rv1775		TCC/TGC	226	S/C	Nonsyn	Coding region
mtbs2010614_A	2010614	2010614	G	A	930
mtbs2022868_C	2022868	3612	T	C	2121	Rv1783	eccC5	AGT/AGC	1204	S/S	Syn	Coding region
mtbs2023628_G	2023628	1001	C	G	848	Rv1785c	cyp143	GGA/GCA	334	G/A	Nonsyn	Coding region
mtbs2030355_G	2030355	9	A	G	135	Rv1792	esxM	TCA/TCG	3	S/S	Syn	Miscellaneous feature
mtbs2044456_G	2044456	1073	T	G	550	Rv1802	PPE30	CTG/CGG	358	L/R	Nonsyn	Coding region
mtbs2045310_G	2045310	1533	A	G	2105	Rv1803c	PE_PGRS32	ATT/ATC	511	I/I	Syn	Coding region
mtbs2046455_T	2046455	388	C	T	23	Rv1803c	PE_PGRS32	GGG/AGG	130	G/R	Nonsyn	Coding region
mtbs2048226_T	2048226	155	C	T	65	Rv1806	PE20	GCA/GTA	52	A/V	Nonsyn	Coding region
mtbs2049065_C	2049065	668	T	C	1895	Rv1807	PPE31	TTC/TCC	223	F/S	Nonsyn	Coding region
mtbs2049097_C	2049097	700	G	C	1719	Rv1807	PPE31	GTC/CTC	234	V/L	Nonsyn	Coding region
mtbs2050822_C	2050822	902	G	C	1055	Rv1808	PPE32	GGA/GCA	301	G/A	Nonsyn	Coding region
mtbs2051746_C	2051746	465	T	C	2001	Rv1809	PPE33	GCT/GCC	155	A/A	Syn	Coding region
mtbs2052035_T	2052035	754	G	T	1766	Rv1809	PPE33	GTG/TTG	252	V/L	Nonsyn	Coding region
mtbs2055271_G	2055271	89	A	G	2091	Rv1812c		CTA/CCA	30	L/P	Nonsyn	Coding region
mtbs2057774_T	2057774	247	A	T	2038	Rv1815		ATC/TTC	83	I/F	Nonsyn	Coding region
mtbs2067684_A	2067684	1228	G	A	759	Rv1821	secA2	GTG/ATG	410	V/M	Nonsyn	Coding region
mtbs2069771_A	2069771	70	C	A	773	Rv1823		CAG/AAG	24	Q/K	Nonsyn	Coding region
mtbs2072313_A	2072313	362	C	A	748	Rv1826	gcvH	ACA/AAA	121	T/K	Nonsyn	Coding region
mtbs2074754_T	2074754	2074754	C	T	1235
mtbs2078246_G	2078246	2370	C	G	751	Rv1832	gcvB	GGC/GGG	790	G/G	Syn	Coding region
mtbs2082053_G	2082053	535	A	G	752	Rv1835c		TGC/CGC	179	C/R	Nonsyn	Coding region
mtbs2086672_T	2086672	310	C	T	772	Rv1837c	glcB	GGT/AGT	104	G/S	Nonsyn	Coding region
mtbs2095716_T	2095716	453	C	T	536	Rv1845c	blaR	GCG/GCA	151	A/A	Syn	Coding region
mtbs2096186_G	2096186	414	A	G	2190	Rv1846c	blaI	ACT/ACC	138	T/T	Syn	Coding region
mtbs2097270_T	2097270	394	C	T	829	Rv1847		CGG/TGG	132	R/W	Nonsyn	Coding region
mtbs2107264_T	2107264	691	C	T	64	Rv1859	modC	CGC/TGC	231	R/C	Nonsyn	Coding region
mtbs2108141_C	2108141	406	T	C	2094	Rv1860	apa	TTC/CTC	136	F/L	Nonsyn	Coding region
mtbs2108890_C	2108890	2108890	A	C	1037
mtbs2112832_C	2112832	135	A	C	765	Rv1865c		GCT/GCG	45	A/A	Syn	Coding region
mtbs2116903_T	2116903	1140	C	T	2115	Rv1867		GGC/GGT	380	G/G	Syn	Coding region
mtbs2122395_T	2122395	757	C	T	874	Rv1872c	lldD2	GTG/ATG	253	V/M	Nonsyn	Coding region
mtbs2122976_G	2122976	176	C	G	1015	Rv1872c	lldD2	GGT/GCT	59	G/A	Nonsyn	Coding region
mtbs2123169_G	2123169	2123169	T	G	1850
mtbs2128870_G	2128870	849	A	G	2022	Rv1878	glnA3	CTA/CTG	283	L/L	Syn	Coding region
mtbs2128908_T	2128908	887	C	T	110	Rv1878	glnA3	TCC/TTC	296	S/F	Nonsyn	Coding region
mtbs2135154_T	2135154	714	G	T	780	Rv1886c	fbpB	CCC/CCA	238	P/P	Syn	Coding region
mtbs2135870_C	2135870	2135870	T	C	1724
mtbs2138436_G	2138436	2138436	A	G	725
mtbs2138453_T	2138453	165	C	T	860	Rv1888A		GGG/GGA	55	G/G	Syn	Coding region
mtbs2142266_A	2142266	2142266	C	A	739
mtbs2143328_C	2143328	808	G	C	1833	Rv1895		GTG/CTG	270	V/L	Nonsyn	Coding region
mtbs2147022_C	2147022	612	A	C	1802	Rv1900c	lipJ	ATT/ATG	204	I/M	Nonsyn	Coding region
mtbs2149762_A	2149762	513	G	A	65	Rv1902c	nanT	TTC/TTT	171	F/F	Syn	Coding region
mtbs2151222_G	2151222	269	T	G	777	Rv1904		TTG/TGG	90	L/W	Nonsyn	Coding region
mtbs2154724_A	2154724	1388	C	A	963	Rv1908c	katG	CGG/CTG	463	R/L	Nonsyn	Coding region
mtbs2155168_G	2155168	944	C	G	688	Rv1908c	katG	AGC/ACC	315	S/T	Nonsyn	Coding region
mtbs2160998_A	2160998	536	G	A	1444	Rv1915	aceAa	GGC/GAC	179	G/D	Nonsyn	Coding region
mtbs2165286_C	2165286	2026	A	C	1909	Rv1917c	PPE34	TCA/GCA	676	S/A	Nonsyn	Coding region
mtbs2167926_G	2167926	2687	A	G	957	Rv1918c	PPE35	TTG/TCG	896	L/S	Nonsyn	Coding region
mtbs2173860_C	2173860	2173860	A	C	820
mtbs2174216_G	2174216	150	A	G	491	Rv1922		GTA/GTG	50	V/V	Syn	Coding region
mtbs2177366_T	2177366	280	C	T	757	Rv1925	fadD31	CGC/TGC	94	R/C	Nonsyn	Coding region
mtbs2179825_C	2179825	153	G	C	798	Rv1927		GAG/GAC	51	E/D	Nonsyn	Coding region
mtbs2187587_C	2187587	204	G	C	885	Rv1936		CAG/CAC	68	Q/H	Nonsyn	Coding region
mtbs2197921_A	2197921	40	T	A	64	Rv1946c	lppG	AGT/TGT	14	S/C	Nonsyn	Coding region
mtbs2198786_G	2198786	279	T	G	65	Rv1948c		CCA/CCC	93	P/P	Syn	Coding region
mtbs2199052_G	2199052	13	C	G	948	Rv1948c		GGT/CGT	5	G/R	Nonsyn	Coding region
mtbs2202500_T	2202500	363	C	T	815	Rv1956	higA	CAC/CAT	121	H/H	Syn	Coding region
mtbs2209465_A	2209465	139	G	A	1097	Rv1966	mce3A	GCG/ACG	47	A/T	Nonsyn	Coding region
mtbs2211826_G	2211826	201	A	G	1812	Rv1968	mce3C	AAA/AAG	67	K/K	Syn	Coding region
mtbs2216443_A	2216443	1187	C	A	2222	Rv1971	mce3F	GCG/GAG	396	A/E	Nonsyn	Coding region
mtbs2216963_G	2216963	372	C	G	768	Rv1972		CAC/CAG	124	H/Q	Nonsyn	Coding region
mtbs2220512_G	2220512	759	T	G	1955	Rv1977		TCT/TCG	253	S/S	Syn	Coding region
mtbs2221584_C	2221584	677	G	C	874	Rv1978		AGT/ACT	226	S/T	Nonsyn	Coding region
mtbs2223293_C	2223293	2223293	T	C	1959
mtbs2225365_C	2225365	2225365	T	C	713
mtbs2228967_G	2228967	2228967	A	G	1906
mtbs2229801_G	2229801	102	C	G	1027	Rv1985c		CCG/CCC	34	P/P	Syn	Coding region
mtbs2230045_A	2230045	35	G	A	725	Rv1986		TGC/TAC	12	C/Y	Nonsyn	Coding region
mtbs2235087_A	2235087	2220	G	A	785	Rv1992c	ctpG	TTC/TTT	740	F/F	Syn	Coding region
mtbs2244421_T	2244421	718	G	T	982	Rv1999c		CTG/ATG	240	L/M	Nonsyn	Coding region
mtbs2245864_A	2245864	656	C	A	769	Rv2000		CCG/CAG	219	P/Q	Nonsyn	Coding region
mtbs2247677_C	2247677	18	A	C	1231	Rv2002	fabG3	ATA/ATC	6	I/I	Syn	Coding region
mtbs2251605_A	2251605	279	G	A	821	Rv2005c		AGC/AGT	93	S/S	Syn	Coding region
mtbs2251999_G	2251999	2251999	A	G	1924
mtbs2260100_T	2260100	2260100	C	T	940
mtbs2260525_T	2260525	83	C	T	2033			GCG/GTG	28	A/V	Nonsyn	Mobile element
mtbs2264782_A	2264782	785	C	A	1907	Rv2017		GCG/GAG	262	A/E	Nonsyn	Coding region
mtbs2265059_G	2265059	2265059	T	G	1722
mtbs2266487_C	2266487	234	G	C	49	Rv2020c		CTC/CTG	78	L/L	Syn	Coding region
mtbs2266508_T	2266508	213	A	T	36	Rv2020c		GAT/GAA	71	D/E	Nonsyn	Coding region
mtbs2266517_C	2266517	204	T	C	40	Rv2020c		GAA/GAG	68	E/E	Syn	Coding region
mtbs2266550_T	2266550	171	G	T	44	Rv2020c		GGC/GGA	57	G/G	Syn	Coding region
mtbs2266553_G	2266553	168	C	G	40	Rv2020c		TCG/TCC	56	S/S	Syn	Coding region
mtbs2266583_G	2266583	138	C	G	56	Rv2020c		GAG/GAC	46	E/D	Nonsyn	Coding region
mtbs2266598_C	2266598	123	G	C	44	Rv2020c		CTC/CTG	41	L/L	Syn	Coding region
mtbs2266604_G	2266604	117	C	G	42	Rv2020c		TCG/TCC	39	S/S	Syn	Coding region
mtbs2266624_T	2266624	97	G	T	47	Rv2020c		CTA/ATA	33	L/I	Nonsyn	Coding region
mtbs2267015_C	2267015	96	T	C	774	Rv2021c		GCA/GCG	32	A/A	Syn	Coding region
mtbs2268433_A	2268433	294	C	A	720	Rv2023A		CAG/CAT	98	Q/H	Nonsyn	Miscellaneous feature
mtbs2268627_C	2268627	100	G	C	758	Rv2023A		CAA/GAA	34	Q/E	Nonsyn	Miscellaneous feature
mtbs2269545_A	2269545	696	G	A	772	Rv2024c		AGC/AGT	232	S/S	Syn	Coding region
mtbs2269780_C	2269780	461	T	C	2095	Rv2024c		GAC/GGC	154	D/G	Nonsyn	Coding region
mtbs2270102_G	2270102	139	A	G	2116	Rv2024c		TGG/CGG	47	W/R	Nonsyn	Coding region
mtbs2282787_T	2282787	935	C	T	1896	Rv2037c		TGT/TAT	312	C/Y	Nonsyn	Coding region
mtbs2283191_C	2283191	531	G	C	848	Rv2037c		GCC/GCG	177	A/A	Syn	Coding region
mtbs2285251_A	2285251	391	C	A	1822	Rv2039c		GTC/TTC	131	V/F	Nonsyn	Coding region
mtbs2287121_G	2287121	726	A	G	1863	Rv2041c		GAT/GAC	242	D/D	Syn	Coding region
mtbs2288085_C	2288085	597	G	C	743	Rv2042c		GCC/GCG	199	A/A	Syn	Coding region
mtbs2288779_T	2288779	463	C	T	3	Rv2043c	pncA	GTG/ATG	155	V/M	Nonsyn	Coding region
mtbs2294007_C	2294007	520	T	C	786	Rv2047c		ACG/GCG	174	T/A	Nonsyn	Coding region
mtbs2296042_C	2296042	10945	G	C	1879	Rv2048c	pks12	CCG/GCG	3649	P/A	Nonsyn	Coding region
mtbs2298194_T	2298194	8793	G	T	867	Rv2048c	pks12	GCC/GCA	2931	A/A	Syn	Coding region
mtbs2300237_G	2300237	6750	A	G	2087	Rv2048c	pks12	GCT/GCC	2250	A/A	Syn	Coding region
mtbs2300546_T	2300546	6441	A	T	1837	Rv2048c	pks12	CAT/CAA	2147	H/Q	Nonsyn	Coding region
mtbs2300552_G	2300552	6435	T	G	1835	Rv2048c	pks12	CCA/CCC	2145	P/P	Syn	Coding region
mtbs2300555_G	2300555	6432	A	G	1845	Rv2048c	pks12	GAT/GAC	2144	D/D	Syn	Coding region
mtbs2302033_A	2302033	4954	G	A	1323	Rv2048c	pks12	CGC/TGC	1652	R/C	Nonsyn	Coding region
mtbs2304238_G	2304238	2749	A	G	64	Rv2048c	pks12	TCC/CCC	917	S/P	Nonsyn	Coding region
mtbs2311099_G	2311099	1419	C	G	1537	Rv2052c		CCG/CCC	473	P/P	Syn	Coding region
mtbs2314689_A	2314689	137	C	A	770	Rv2057c	rpmG1	CGT/CTT	46	R/L	Nonsyn	Coding region
mtbs2315386_A	2315386	213	C	A	767	Rv2059		CAC/CAA	71	H/Q	Nonsyn	Coding region
mtbs2316123_A	2316123	950	C	A	804	Rv2059		ACA/AAA	317	T/K	Nonsyn	Coding region
mtbs2320320_T	2320320	434	C	T	817	Rv2062c	cobN	CGT/CAT	145	R/H	Nonsyn	Coding region
mtbs2321369_G	2321369	313	A	G	64	Rv2063A	mazF7	AAC/GAC	105	N/D	Nonsyn	Coding region
mtbs2321975_C	2321975	525	T	C	829	Rv2064	cobG	GAT/GAC	175	D/D	Syn	Coding region
mtbs2328543_C	2328543	435	T	C	1084	Rv2071c	cobM	ATA/ATG	145	I/M	Nonsyn	Coding region
mtbs2329533_G	2329533	614	A	G	1991	Rv2072c	cobL	CTC/CCC	205	L/P	Nonsyn	Coding region
mtbs2331620_C	2331620	1260	A	C	1091	Rv2075c		GGT/GGG	420	G/G	Syn	Coding region
mtbs2331789_T	2331789	1091	G	T	1004	Rv2075c		CCG/CAG	364	P/Q	Nonsyn	Coding region
mtbs2334007_G	2334007	288	A	G	1768	Rv2077c		GCT/GCC	96	A/A	Syn	Coding region
mtbs2335075_G	2335075	17	A	G	1697	Rv2078		GAA/GGA	6	E/G	Nonsyn	Coding region
mtbs2335494_G	2335494	140	A	G	2015	Rv2079		TAC/TGC	47	Y/C	Nonsyn	Coding region
mtbs2337179_T	2337179	1825	C	T	762	Rv2079		CAA/TAA	609	Q/Stop	Nonsyn	Coding region
mtbs2338810_C	2338810	102	T	C	974	Rv2082		CGT/CGC	34	R/R	Syn	Coding region
mtbs2338811_G	2338811	103	A	G	974	Rv2082		AAG/GAG	35	K/E	Nonsyn	Coding region
mtbs2339255_G	2339255	547	A	G	995	Rv2082		ACT/GCT	183	T/A	Nonsyn	Coding region
mtbs2340621_G	2340621	1913	C	G	2100	Rv2082		CCC/CGC	638	P/R	Nonsyn	Coding region
mtbs2341636_G	2341636	766	C	G	2180	Rv2083		CTG/GTG	256	L/V	Nonsyn	Coding region
mtbs2344246_C	2344246	1305	G	C	823			ACG/ACC	435	T/T	Syn	Mobile element
mtbs2345037_A	2345037	627	C	A	1930	Rv2088	pknJ	CTC/CTA	209	L/L	Syn	Coding region
mtbs2348446_G	2348446	1074	C	G	1948	Rv2090		TTC/TTG	358	F/L	Nonsyn	Coding region
mtbs2361604_G	2361604	1365	C	G	2021	Rv2101	helZ	GTC/GTG	455	V/V	Syn	Coding region
mtbs2362041_A	2362041	1802	C	A	1965	Rv2101	helZ	CCG/CAG	601	P/Q	Nonsyn	Coding region
mtbs2364475_C	2364475	46	T	C	759	Rv2103c	vapC37	ACA/GCA	16	T/A	Nonsyn	Coding region
mtbs2369186_C	2369186	544	G	C	991	Rv2109c	prcA	CGT/GGT	182	R/G	Nonsyn	Coding region
mtbs2386389_A	2386389	97	G	A	2031	Rv2125		GGC/AGC	33	G/S	Nonsyn	Coding region
mtbs2387733_C	2387733	240	T	C	2330	Rv2126c	PE_PGRS37	GAA/GAG	80	E/E	Syn	Coding region
mtbs2388641_A	2388641	26	G	A	1075	Rv2127	ansP1	GGC/GAC	9	G/D	Nonsyn	Coding region
mtbs2399734_A	2399734	1015	G	A	857	Rv2139	pyrD	GGC/AGC	339	G/S	Nonsyn	Coding region
mtbs2413246_A	2413246	106	C	A	1166	Rv2153c	murG	GTG/TTG	36	V/L	Nonsyn	Coding region
mtbs2415656_C	2415656	739	G	C	2304	Rv2155c	murD	CGG/GGG	247	R/G	Nonsyn	Coding region
mtbs2421816_G	2421816	188	A	G	1173	Rv2160c		GTG/GCG	63	V/A	Nonsyn	Coding region
mtbs2424925_G	2424925	2424925	A	G	1869
mtbs2440926_T	2440926	795	G	T	1766	Rv2178c	aroG	GAC/GAA	265	D/E	Nonsyn	Coding region
mtbs2442468_T	2442468	747	C	T	800	Rv2180c		TGG/TGA	249	W/Stop	Nonsyn	Coding region
mtbs2448458_T	2448458	299	C	T	982	Rv2187	fadD15	ACC/ATC	100	T/I	Nonsyn	Coding region
mtbs2451700_C	2451700	321	A	C	785	Rv2189c		GCT/GCG	107	A/A	Syn	Coding region
mtbs2462871_A	2462871	177	G	A	1896	Rv2198c	mmpS3	GCC/GCT	59	A/A	Syn	Coding region
mtbs2470591_C	2470591	2470591	A	C	998
mtbs2472610_T	2472610	118	C	T	530	Rv2208	cobS	CTG/TTG	40	L/L	Syn	Coding region
mtbs2491597_T	2491597	757	G	T	792	Rv2221c	glnE	CGG/AGG	253	R/R	Syn	Coding region
mtbs2499726_A	2499726	895	G	A	1901	Rv2226		GAT/AAT	299	D/N	Nonsyn	Coding region
mtbs2505085_A	2505085	615	G	A	778	Rv2231c	cobC	GCC/GCT	205	A/A	Syn	Coding region
mtbs2509140_C	2509140	236	G	C	2116	Rv2236c	cobD	TCC/TGC	79	S/C	Nonsyn	Coding region
mtbs2509722_G	2509722	234	A	G	2182	Rv2237		CCA/CCG	78	P/P	Syn	Coding region
mtbs2510350_G	2510350	2510350	C	G	749
mtbs2513645_A	2513645	1107	G	A	538	Rv2241	aceE	AAG/AAA	369	K/K	Syn	Coding region
mtbs2521342_C	2521342	600	T	C	2054	Rv2247	accD6	GAT/GAC	200	D/D	Syn	Coding region
mtbs2521428_G	2521428	686	A	G	770	Rv2247	accD6	GAC/GGC	229	D/G	Nonsyn	Coding region
mtbs2522955_G	2522955	596	T	G	781	Rv2248		GTC/GGC	199	V/G	Nonsyn	Coding region
mtbs2526974_C	2526974	1410	T	C	1299	Rv2251		CCT/CCC	470	P/P	Syn	Coding region
mtbs2527575_A	2527575	587	G	A	65	Rv2252		GGC/GAC	196	G/D	Nonsyn	Coding region
mtbs2529680_G	2529680	195	A	G	1859	Rv2256c		ACT/ACC	65	T/T	Syn	Coding region
mtbs2531742_G	2531742	156	A	G	1790	Rv2258c		GCT/GCC	52	A/A	Syn	Coding region
mtbs2533377_C	2533377	48	T	C	893	Rv2260		GAT/GAC	16	D/D	Syn	Coding region
mtbs2536599_T	2536599	1752	C	T	791	Rv2264c		GGG/GGA	584	G/G	Syn	Coding region
mtbs2543395_C	2543395	882	T	C	755	Rv2268c	cyp128	GAA/GAG	294	E/E	Syn	Coding region
mtbs2546684_A	2546684	122	C	A	813	Rv2274c	mazF8	GGT/GTT	41	G/V	Nonsyn	Coding region
mtbs2548700_T	2548700	952	C	T	785	Rv2276	cyp121	CAC/TAC	318	H/Y	Nonsyn	Coding region
mtbs2562644_T	2562644	46	G	T	857	Rv2290	lppO	GCG/TCG	16	A/S	Nonsyn	Coding region
mtbs2566768_C	2566768	2566768	A	C	169
mtbs2573756_A	2573756	2573756	C	A	1702
mtbs2578626_G	2578626	71	A	G	1310	Rv2307c		ATG/ACG	24	M/T	Nonsyn	Coding region
mtbs2581052_A	2581052	634	G	A	768	Rv2308		GAC/AAC	212	D/N	Nonsyn	Coding region
mtbs2586076_G	2586076	1215	C	G	834	Rv2314c		CGG/CGC	405	R/R	Syn	Coding region
mtbs2586127_G	2586127	1164	A	G	2086	Rv2314c		GGT/GGC	388	G/G	Syn	Coding region
mtbs2589036_C	2589036	199	G	C	812	Rv2316	uspA	GAC/CAC	67	D/H	Nonsyn	Coding region
mtbs2589216_C	2589216	379	G	C	1314	Rv2316	uspA	GTG/CTG	127	V/L	Nonsyn	Coding region
mtbs2598400_G	2598400	1548	A	G	1969	Rv2326c		AAT/AAC	516	N/N	Syn	Coding region
mtbs2600260_G	2600260	273	A	G	953	Rv2327		CGA/CGG	91	R/R	Syn	Coding region
mtbs2601576_G	2601576	846	T	G	852	Rv2328	PE23	AGT/AGG	282	S/R	Nonsyn	Coding region
mtbs2601760_A	2601760	1030	G	A	748	Rv2328	PE23	GCC/ACC	344	A/T	Nonsyn	Coding region
mtbs2608117_A	2608117	205	C	A	1441	Rv2333c	stp	GAC/TAC	69	D/Y	Nonsyn	Coding region
mtbs2612632_A	2612632	356	C	A	2036	Rv2337c		GGC/GTC	119	G/V	Nonsyn	Coding region
mtbs2619271_C	2619271	2619271	T	C	944
mtbs2625924_C	2625924	249	T	C	1111	Rv2346c	esxO	GCA/GCG	83	A/A	Syn	Coding region
mtbs2626004_A	2626004	169	G	A	982	Rv2346c	esxO	CTG/TTG	57	L/L	Syn	Coding region
mtbs2626011_A	2626011	162	G	A	978	Rv2346c	esxO	ATC/ATT	54	I/I	Syn	Coding region
mtbs2626018_C	2626018	155	T	C	914	Rv2346c	esxO	GAG/GGG	52	E/G	Nonsyn	Coding region
mtbs2626513_A	2626513	7	T	A	1081	Rv2347c	esxP	ACA/TCA	3	T/S	Nonsyn	Coding region
mtbs2626514_G	2626514	6	T	G	1082	Rv2347c	esxP	GCA/GCC	2	A/A	Syn	Coding region
mtbs2627618_A	2627618	1081	C	A	761	Rv2349c	plcC	GGC/TGC	361	G/C	Nonsyn	Coding region
mtbs2627946_G	2627946	753	A	G	827	Rv2349c	plcC	CGT/CGC	251	R/R	Syn	Coding region
mtbs2630740_C	2630740	1336	T	C	798	Rv2351c	plcA	ACT/GCT	446	T/A	Nonsyn	Coding region
mtbs2631371_T	2631371	705	C	T	762	Rv2351c	plcA	GTG/GTA	235	V/V	Syn	Coding region
mtbs2637541_T	2637541	2637541	C	T	1181
mtbs2642383_T	2642383	196	C	T	1243	Rv2360c		GCC/ACC	66	A/T	Nonsyn	Coding region
mtbs2647905_A	2647905	463	G	A	763	Rv2366c		CGC/TGC	155	R/C	Nonsyn	Coding region
mtbs2656225_G	2656225	206	A	G	1930	Rv2377c	mbtH	GTC/GCC	69	V/A	Nonsyn	Coding region
mtbs2660319_G	2660319	1767	C	G	1757	Rv2379c	mbtF	GAG/GAC	589	E/D	Nonsyn	Coding region
mtbs2663795_A	2663795	3321	G	A	843	Rv2380c	mbtE	GCC/GCT	1107	A/A	Syn	Coding region
mtbs2668467_A	2668467	1803	G	A	535	Rv2381c	mbtD	CCC/CCT	601	P/P	Syn	Coding region
mtbs2673818_G	2673818	2020	C	G	844	Rv2383c	mbtB	GTG/CTG	674	V/L	Nonsyn	Coding region
mtbs2680658_G	2680658	2680658	T	G	1775
mtbs2695378_G	2695378	422	C	G	1753	Rv2398c	cysW	GGC/GCC	141	G/A	Nonsyn	Coding region
mtbs2697489_T	2697489	226	C	T	873	Rv2400c	subI	GCG/ACG	76	A/T	Nonsyn	Coding region
mtbs2706663_T	2706663	647	G	T	800	Rv2408	PE24	GGT/GTT	216	G/V	Nonsyn	Coding region
mtbs2711722_G	2711722	1155	T	G	899	Rv2414c		CCA/CCC	385	P/P	Syn	Coding region
mtbs2713795_T	2713795	2713795	C	T	1888
mtbs2718852_G	2718852	2718852	T	G	1921
mtbs2720952_C	2720952	826	T	C	1077	Rv2424c		ACC/GCC	276	T/A	Nonsyn	Coding region
mtbs2720954_A	2720954	824	G	A	1077	Rv2424c		ACC/ATC	275	T/I	Nonsyn	Coding region
mtbs2721562_G	2721562	216	C	G	1231	Rv2424c		GCG/GCC	72	A/A	Syn	Coding region
mtbs2723506_C	2723506	678	T	C	956	Rv2426c		TTA/TTG	226	L/L	Syn	Coding region
mtbs2729058_C	2729058	77	A	C	915	Rv2433c		CTG/CGG	26	L/R	Nonsyn	Coding region
mtbs2734074_C	2734074	845	T	C	2346	Rv2436	rbsK	GTC/GCC	282	V/A	Nonsyn	Coding region
mtbs2737572_A	2737572	676	C	A	1522	Rv2439c	proB	GCG/TCG	226	A/S	Nonsyn	Coding region
mtbs2738274_C	2738274	1413	A	C	873	Rv2440c	obg	AGT/AGG	471	S/R	Nonsyn	Coding region
mtbs2741209_A	2741209	501	G	A	792	Rv2443	dctA	CTG/CTA	167	L/L	Syn	Coding region
mtbs2751804_T	2751804	377	C	T	2254	Rv2450c	rpfE	CGG/CAG	126	R/Q	Nonsyn	Coding region
mtbs2752122_C	2752122	59	G	C	886	Rv2450c	rpfE	ACG/AGG	20	T/R	Nonsyn	Coding region
mtbs2752698_A	2752698	2752698	C	A	1796
mtbs2760152_G	2760152	374	A	G	2061	Rv2458	mmuM	TAC/TGC	125	Y/C	Nonsyn	Coding region
mtbs2775361_T	2775361	90	C	T	810	Rv2472		CGC/CGT	30	R/R	Syn	Coding region
mtbs2779136_C	2779136	3127	T	C	1999	Rv2476c	gdh	AGC/GGC	1043	S/G	Nonsyn	Coding region
mtbs2786952_G	2786952	2332	A	G	1962	Rv2482c	plsB2	TGC/CGC	778	C/R	Nonsyn	Coding region
mtbs2789798_T	2789798	1225	G	T	751	Rv2483c	plsC	CGG/AGG	409	R/R	Syn	Coding region
mtbs2791098_T	2791098	1397	C	T	1089	Rv2484c		GGT/GAT	466	G/D	Nonsyn	Coding region
mtbs2793810_A	2793810	179	C	A	789	Rv2485c	lipQ	CGC/CTC	60	R/L	Nonsyn	Coding region
mtbs2794071_A	2794071	2794071	G	A	738
mtbs2800087_A	2800087	794	G	A	778	Rv2488c		ACC/ATC	265	T/I	Nonsyn	Coding region
mtbs2807486_A	2807486	209	C	A	924	Rv2492		GCC/GAC	70	A/D	Nonsyn	Coding region
mtbs2808452_C	2808452	143	T	C	767	Rv2494	vapC38	GTG/GCG	48	V/A	Nonsyn	Coding region
mtbs2809621_C	2809621	319	T	C	2199	Rv2495c	bkdC	ACC/GCC	107	T/A	Nonsyn	Coding region
mtbs2817269_T	2817269	1206	C	T	65	Rv2502c	accD1	AAG/AAA	402	K/K	Syn	Coding region
mtbs2817502_C	2817502	973	A	C	747	Rv2502c	accD1	TTT/GTT	325	F/V	Nonsyn	Coding region
mtbs2818837_G	2818837	291	A	G	1985	Rv2503c	scoB	GGT/GGC	97	G/G	Syn	Coding region
mtbs2821342_T	2821342	255	C	T	1994	Rv2505c	fadD35	GCG/GCA	85	A/A	Syn	Coding region
mtbs2825466_A	2825466	789	G	A	984	Rv2509		AAG/AAA	263	K/K	Syn	Coding region
mtbs2825581_G	2825581	1509	T	G	787	Rv2510c		ATA/ATC	503	I/I	Syn	Coding region
mtbs2827984_T	2827984	2827984	G	T	1919
mtbs2828019_C	2828019	2828019	T	C	1953
mtbs2829779_C	2829779	25	T	C	1506	Rv2512c		ACC/GCC	9	T/A	Nonsyn	Coding region
mtbs2830525_A	2830525	365	C	A	1870	Rv2513		ACG/AAG	122	T/K	Nonsyn	Coding region
mtbs2833329_A	2833329	185	G	A	779	Rv2516c		GCT/GTT	62	A/V	Nonsyn	Coding region
mtbs2835984_C	2835984	200	T	C	774	Rv2519	PE26	GTG/GCG	67	V/A	Nonsyn	Coding region
mtbs2838897_G	2838897	645	C	G	691	Rv2522c		ATG/ATC	215	M/I	Nonsyn	Coding region
mtbs2841022_G	2841022	8311	A	G	1157	Rv2524c	fas	TGC/CGC	2771	C/R	Nonsyn	Coding region
mtbs2844573_T	2844573	4760	C	T	537	Rv2524c	fas	CGC/CAC	1587	R/H	Nonsyn	Coding region
mtbs2847281_G	2847281	2052	A	G	1010	Rv2524c	fas	GAT/GAC	684	D/D	Syn	Coding region
mtbs2850631_C	2850631	2850631	T	C	719
mtbs2855259_G	2855259	2523	A	G	2178	Rv2531c		GCT/GCC	841	A/A	Syn	Coding region
mtbs2865760_G	2865760	631	A	G	1909	Rv2542		ACC/GCC	211	T/A	Nonsyn	Coding region
mtbs2865882_C	2865882	753	T	C	1782	Rv2542		GTT/GTC	251	V/V	Syn	Coding region
mtbs2866607_A	2866607	140	G	A	848	Rv2543	lppA	GGC/GAC	47	G/D	Nonsyn	Coding region
mtbs2866647_A	2866647	180	G	A	796	Rv2543	lppA	AAG/AAA	60	K/K	Syn	Coding region
mtbs2866671_A	2866671	204	G	A	766	Rv2543	lppA	GAG/GAA	68	E/E	Syn	Coding region
mtbs2866677_C	2866677	210	A	C	767	Rv2543	lppA	CTA/CTC	70	L/L	Syn	Coding region
mtbs2866863_G	2866863	396	C	G	857	Rv2543	lppA	GCC/GCG	132	A/A	Syn	Coding region
mtbs2866876_G	2866876	409	A	G	927	Rv2543	lppA	ATT/GTT	137	I/V	Nonsyn	Coding region
mtbs2866880_T	2866880	413	C	T	924	Rv2543	lppA	GCC/GTC	138	A/V	Nonsyn	Coding region
mtbs2866882_A	2866882	415	G	A	927	Rv2543	lppA	GCC/ACC	139	A/T	Nonsyn	Coding region
mtbs2867756_C	2867756	633	T	C	956	Rv2544	lppB	ATT/ATC	211	I/I	Syn	Coding region
mtbs2871048_T	2871048	147	C	T	519	Rv2551c		CTG/CTA	49	L/L	Syn	Coding region
mtbs2880702_C	2880702	628	G	C	1689	Rv2560		GTC/CTC	210	V/L	Nonsyn	Coding region
mtbs2881974_A	2881974	217	G	A	755	Rv2562		GCC/ACC	73	A/T	Nonsyn	Coding region
mtbs2886570_G	2886570	198	A	G	1047	Rv2566		GAA/GAG	66	E/E	Syn	Coding region
mtbs2888201_C	2888201	1829	T	C	2067	Rv2566		CTC/CCC	610	L/P	Nonsyn	Coding region
mtbs2889633_C	2889633	3261	T	C	2324	Rv2566		GCT/GCC	1087	A/A	Syn	Coding region
mtbs2891267_T	2891267	1473	C	T	2019	Rv2567		GGC/GGT	491	G/G	Syn	Coding region
mtbs2891728_G	2891728	1934	A	G	2097	Rv2567		CAG/CGG	645	Q/R	Nonsyn	Coding region
mtbs2894208_A	2894208	201	G	A	2074	Rv2569c		AGC/AGT	67	S/S	Syn	Coding region
mtbs2898522_C	2898522	480	T	C	919	Rv2573		TAT/TAC	160	Y/Y	Syn	Coding region
mtbs2910461_T	2910461	440	G	T	2270	Rv2584c	apt	GCG/GAG	147	A/E	Nonsyn	Coding region
mtbs2911293_G	2911293	1385	C	G	2078	Rv2585c		TGT/TCT	462	C/S	Nonsyn	Coding region
mtbs2912294_G	2912294	384	T	G	1976	Rv2585c		GCA/GCC	128	A/A	Syn	Coding region
mtbs2915934_G	2915934	260	T	G	66	Rv2588c	yajC	GAC/GCC	87	D/A	Nonsyn	Coding region
mtbs2922591_A	2922591	1041	C	A	722	Rv2591	PE_PGRS44	GCC/GCA	347	A/A	Syn	Coding region
mtbs2922846_T	2922846	1296	C	T	891	Rv2591	PE_PGRS44	GGC/GGT	432	G/G	Syn	Coding region
mtbs2922848_T	2922848	1298	A	T	896	Rv2591	PE_PGRS44	CAG/CTG	433	Q/L	Nonsyn	Coding region
mtbs2923391_C	2923391	843	T	C	2301	Rv2592c	ruvB	CCA/CCG	281	P/P	Syn	Coding region
mtbs2927939_C	2927939	2927939	T	C	1893
mtbs2939372_G	2939372	591	A	G	63	Rv2611c		TCT/TCC	197	S/S	Syn	Coding region
mtbs2939373_C	2939373	590	G	C	2043	Rv2611c		TCT/TGT	197	S/C	Nonsyn	Coding region
mtbs2939657_C	2939657	306	T	C	2134	Rv2611c		ATA/ATG	102	I/M	Nonsyn	Coding region
mtbs2944515_C	2944515	471	A	C	697	Rv2615c	PE_PGRS45	GGT/GGG	157	G/G	Syn	Coding region
mtbs2944524_G	2944524	462	C	G	688	Rv2615c	PE_PGRS45	GGG/GGC	154	G/G	Syn	Coding region
mtbs2944769_C	2944769	217	G	C	49	Rv2615c	PE_PGRS45	CAA/GAA	73	Q/E	Nonsyn	Coding region
mtbs2944773_G	2944773	213	A	G	48	Rv2615c	PE_PGRS45	TAT/TAC	71	Y/Y	Syn	Coding region
mtbs2948230_A	2948230	329	G	A	858	Rv2621c		GCC/GTC	110	A/V	Nonsyn	Coding region
mtbs2954439_C	2954439	310	T	C	1865	Rv2627c		AGA/GGA	104	R/G	Nonsyn	Coding region
mtbs2955957_C	2955957	191	A	C	813	Rv2629		GAT/GCT	64	D/A	Nonsyn	Coding region
mtbs2968452_A	2968452	2968452	G	A	64
mtbs2969197_G	2969197	2969197	A	G	731
mtbs2974933_G	2974933	302	A	G	1957	Rv2650c		ATC/ACC	101	I/T	Nonsyn	Coding region
mtbs2975227_G	2975227	8	T	G	872	Rv2650c		AAT/ACT	3	N/T	Nonsyn	Coding region
mtbs2979141_C	2979141	169	G	C	88	Rv2657c		CGC/GGC	57	R/G	Nonsyn	Coding region
mtbs2980861_G	2980861	2980861	A	G	729
mtbs2982829_G	2982829	131	T	G	64	Rv2665		CTC/CGC	44	L/R	Nonsyn	Coding region
mtbs2983095_G	2983095	25	A	G	1104	Rv2666		ACC/GCC	9	T/A	Nonsyn	Coding region
mtbs2983613_A	2983613	543	G	A	1039	Rv2666		GGG/GGA	181	G/G	Syn	Coding region
mtbs2983873_G	2983873	803	A	G	781	Rv2666		TAA/TGA	268	Stop/Stop	Syn	Coding region
mtbs2984740_G	2984740	8	A	G	2151	Rv2668		CAC/CGC	3	H/R	Nonsyn	Coding region
mtbs2986827_A	2986827	14	G	A	69	Rv2670c		GCA/GTA	5	A/V	Nonsyn	Coding region
mtbs2988630_G	2988630	949	C	G	1060	Rv2672		CAT/GAT	317	H/D	Nonsyn	Coding region
mtbs3003115_G	3003115	1133	C	G	996	Rv2685	arsB1	GCA/GGA	378	A/G	Nonsyn	Coding region
mtbs3005185_T	3005185	466	G	T	1830	Rv2688c		CCC/ACC	156	P/T	Nonsyn	Coding region
mtbs3009692_G	3009692	349	A	G	1845	Rv2691	ceoB	ACC/GCC	117	T/A	Nonsyn	Coding region
mtbs3010420_G	3010420	397	A	G	1046	Rv2692	ceoC	ATC/GTC	133	I/V	Nonsyn	Coding region
mtbs3010993_T	3010993	376	C	T	834	Rv2693c		GGG/AGG	126	G/R	Nonsyn	Coding region
mtbs3017465_C	3017465	608	T	C	1860	Rv2702	ppgK	ATA/ACA	203	I/T	Nonsyn	Coding region
mtbs3024021_A	3024021	457	C	A	814	Rv2711	ideR	CGG/AGG	153	R/R	Syn	Coding region
mtbs3024343_A	3024343	986	G	A	781	Rv2712c		ACC/ATC	329	T/I	Nonsyn	Coding region
mtbs3027798_C	3027798	734	T	C	1189	Rv2714		GTG/GCG	245	V/A	Nonsyn	Coding region
mtbs3031168_G	3031168	370	A	G	1159	Rv2719c		TAT/CAT	124	Y/H	Nonsyn	Coding region
mtbs3033189_A	3033189	1431	G	A	769	Rv2721c		CCC/CCT	477	P/P	Syn	Coding region
mtbs3036826_T	3036826	466	C	T	743	Rv2724c	fadE20	GTG/ATG	156	V/M	Nonsyn	Coding region
mtbs3041871_T	3041871	605	G	T	1800	Rv2729c		GCG/GAG	202	A/E	Nonsyn	Coding region
mtbs3048912_G	3048912	175	C	G	859	Rv2736c	recX	GTT/CTT	59	V/L	Nonsyn	Coding region
mtbs3054081_G	3054081	168	A	G	1828	Rv2741	PE_PGRS47	GGA/GGG	56	G/G	Syn	Coding region
mtbs3054321_G	3054321	408	A	G	2269	Rv2741	PE_PGRS47	GGA/GGG	136	G/G	Syn	Coding region
mtbs3056767_T	3056767	466	G	T	712	Rv2743c		CCG/ACG	156	P/T	Nonsyn	Coding region
mtbs3069167_G	3069167	917	A	G	1273	Rv2756c	hsdM	CTG/CCG	306	L/P	Nonsyn	Coding region
mtbs3073715_C	3073715	757	G	C	19	Rv2764c	thyA	CCG/GCG	253	P/A	Nonsyn	Coding region
mtbs3079877_G	3079877	581	A	G	1033	Rv2770c	PPE44	TTC/TCC	194	F/S	Nonsyn	Coding region
mtbs3080795_G	3080795	239	A	G	1915	Rv2771c		CTC/CCC	80	L/P	Nonsyn	Coding region
mtbs3086788_C	3086788	3086788	T	C	1647
mtbs3103682_C	3103682	259	T	C	2096	Rv2794c	pptT	ATG/GTG	87	M/V	Nonsyn	Coding region
mtbs3104189_G	3104189	723	A	G	948	Rv2795c		TGT/TGC	241	C/C	Syn	Coding region
mtbs3110140_T	3110140	3110140	G	T	729
mtbs3111476_T	3111476	348	C	T	865	Rv2802c		TCG/TCA	116	S/S	Syn	Coding region
mtbs3112877_A	3112877	11	G	A	1045	Rv2805		GGC/GAC	4	G/D	Nonsyn	Coding region
mtbs3113872_T	3113872	215	A	T	2123	Rv2807		GAG/GTG	72	E/V	Nonsyn	Coding region
mtbs3118000_G	3118000	1183	A	G	2105	Rv2812		AGG/GGG	395	R/G	Nonsyn	Coding region
mtbs3133054_G	3133054	486	C	G	1152	Rv2825c		TCG/TCC	162	S/S	Syn	Coding region
mtbs3133055_C	3133055	485	G	C	1150	Rv2825c		TCG/TGG	162	S/W	Nonsyn	Coding region
mtbs3133536_C	3133536	4	T	C	1709	Rv2825c		AAA/GAA	2	K/E	Nonsyn	Coding region
mtbs3135606_G	3135606	3135606	A	G	734
mtbs3135912_C	3135912	422	G	C	1068	Rv2828c		ACG/AGG	141	T/R	Nonsyn	Coding region
mtbs3135950_G	3135950	384	C	G	1033	Rv2828c		TCG/TCC	128	S/S	Syn	Coding region
mtbs3135951_C	3135951	383	G	C	1035	Rv2828c		TCG/TGG	128	S/W	Nonsyn	Coding region
mtbs3137058_A	3137058	167	G	A	1982	Rv2830c	vapB22	GCG/GTG	56	A/V	Nonsyn	Coding region
mtbs3162805_G	3162805	538	C	G	2105	Rv2853	PE_PGRS48	CGC/GGC	180	R/G	Nonsyn	Coding region
mtbs3177452_A	3177452	3177452	C	A	718
mtbs3177884_A	3177884	63	C	A	2078	Rv2866	relG	CGC/CGA	21	R/R	Syn	Coding region
mtbs3180988_A	3180988	775	C	A	1048	Rv2869c	rip	GTC/TTC	259	V/F	Nonsyn	Coding region
mtbs3186860_G	3186860	2014	T	G	2208	Rv2874	dipZ	TAT/GAT	672	Y/D	Nonsyn	Coding region
mtbs3189242_G	3189242	156	A	G	1089	Rv2878c	mpt53	GCT/GCC	52	A/A	Syn	Coding region
mtbs3198076_G	3198076	210	C	G	23	Rv2888c	amiC	CAG/CAC	70	Q/H	Nonsyn	Coding region
mtbs3200282_T	3200282	17	C	T	792	Rv2891		GCG/GTG	6	A/V	Nonsyn	Coding region
mtbs3214869_G	3214869	242	A	G	805	Rv2905	lppW	CAG/CGG	81	Q/R	Nonsyn	Coding region
mtbs3226181_C	3226181	105	A	C	1956	Rv2916c	ffh	CGT/CGG	35	R/R	Syn	Coding region
mtbs3228143_T	3228143	1781	G	T	2239	Rv2917		CGG/CTG	594	R/L	Nonsyn	Coding region
mtbs3247316_G	3247316	1872	C	G	1993	Rv2931	ppsA	GAC/GAG	624	D/E	Nonsyn	Coding region
mtbs3247851_A	3247851	2407	G	A	2030	Rv2931	ppsA	GCC/ACC	803	A/T	Nonsyn	Coding region
mtbs3247853_T	3247853	2409	C	T	2030	Rv2931	ppsA	GCC/GCT	803	A/A	Syn	Coding region
mtbs3247856_C	3247856	2412	G	C	2121	Rv2931	ppsA	CGG/CGC	804	R/R	Syn	Coding region
mtbs3247874_A	3247874	2430	G	A	1923	Rv2931	ppsA	CGG/CGA	810	R/R	Syn	Coding region
mtbs3247877_C	3247877	2433	T	C	1980	Rv2931	ppsA	TTT/TTC	811	F/F	Syn	Coding region
mtbs3247883_C	3247883	2439	T	C	2129	Rv2931	ppsA	AGT/AGC	813	S/S	Syn	Coding region
mtbs3248074_A	3248074	2630	G	A	2036	Rv2931	ppsA	CGC/CAC	877	R/H	Nonsyn	Coding region
mtbs3248075_T	3248075	2631	C	T	2035	Rv2931	ppsA	CGC/CGT	877	R/R	Syn	Coding region
mtbs3249025_G	3249025	3581	T	G	757	Rv2931	ppsA	CTA/CGA	1194	L/R	Nonsyn	Coding region
mtbs3256494_G	3256494	810	A	G	1875	Rv2933	ppsC	GGA/GGG	270	G/G	Syn	Coding region
mtbs3266030_G	3266030	3783	A	G	1174	Rv2934	ppsD	TCA/TCG	1261	S/S	Syn	Coding region
mtbs3269581_G	3269581	1845	A	G	1913	Rv2935	ppsE	GCA/GCG	615	A/A	Syn	Coding region
mtbs3270784_G	3270784	3048	A	G	1996	Rv2935	ppsE	CAA/CAG	1016	Q/Q	Syn	Coding region
mtbs3284640_G	3284640	1306	A	G	736	Rv2941	fadD28	ACA/GCA	436	T/A	Nonsyn	Coding region
mtbs3284855_T	3284855	1521	C	T	756	Rv2941	fadD28	ATC/ATT	507	I/I	Syn	Coding region
mtbs3296843_G	3296843	998	A	G	2195	Rv2947c	pks15	GTG/GCG	333	V/A	Nonsyn	Coding region
mtbs3302980_C	3302980	3302980	T	C	64
mtbs3304966_A	3304966	526	G	A	756	Rv2952		GGG/AGG	176	G/R	Nonsyn	Coding region
mtbs3308606_A	3308606	3308606	G	A	1807
mtbs3310174_A	3310174	705	G	A	703	Rv2957		AAG/AAA	235	K/K	Syn	Coding region
mtbs3310427_C	3310427	3310427	T	C	717
mtbs3310626_C	3310626	3310626	T	C	746
mtbs3314412_G	3314412	711	A	G	1025	Rv2962c		GCT/GCC	237	A/A	Syn	Coding region
mtbs3316955_C	3316955	427	A	C	841	Rv2964	purU	ATG/CTG	143	M/L	Nonsyn	Coding region
mtbs3326554_C	3326554	454	A	C	953	Rv2971		AAC/CAC	152	N/H	Nonsyn	Coding region
mtbs3332110_A	3332110	645	G	A	65	Rv2976c	ung	GTC/GTT	215	V/V	Syn	Coding region
mtbs3336825_C	3336825	1093	T	C	2152	Rv2981c	ddlA	ACA/GCA	365	T/A	Nonsyn	Coding region
mtbs3338603_C	3338603	397	G	C	2095	Rv2982c	gpdA2	CCG/GCG	133	P/A	Nonsyn	Coding region
mtbs3338820_C	3338820	180	T	C	65	Rv2982c	gpdA2	CCA/CCG	60	P/P	Syn	Coding region
mtbs3352932_G	3352932	537	C	G	1286	Rv2995c	leuB	ACG/ACC	179	T/T	Syn	Coding region
mtbs3356135_C	3356135	1037	A	C	531	Rv2997		GAA/GCA	346	E/A	Nonsyn	Coding region
mtbs3358235_T	3358235	634	A	T	1883	Rv2999	lppY	ATG/TTG	212	M/L	Nonsyn	Coding region
mtbs3363338_G	3363338	3363338	A	G	1875
mtbs3367765_A	3367765	1029	G	A	1921	Rv3009c	gatB	GGC/GGT	343	G/G	Syn	Coding region
mtbs3375165_C	3375165	500	A	C	903	Rv3015c		TTC/TGC	167	F/C	Nonsyn	Coding region
mtbs3379432_C	3379432	1021	T	C	647	Rv3021c	PPE47	AGC/GGC	341	S/G	Nonsyn	Miscellaneous feature
mtbs3379708_C	3379708	745	G	C	1424	Rv3021c	PPE47	CTG/GTG	249	L/V	Nonsyn	Miscellaneous feature
mtbs3379712_C	3379712	741	G	C	1406	Rv3021c	PPE47	GCC/GCG	247	A/A	Syn	Miscellaneous feature
mtbs3379718_C	3379718	735	T	C	1400	Rv3021c	PPE47	GGA/GGG	245	G/G	Syn	Miscellaneous feature
mtbs3379731_T	3379731	722	G	T	4	Rv3021c	PPE47	GCC/GAC	241	A/D	Nonsyn	Miscellaneous feature
mtbs3379742_C	3379742	711	T	C	1434	Rv3021c	PPE47	GTA/GTG	237	V/V	Syn	Miscellaneous feature
mtbs3379751_C	3379751	702	A	C	1562	Rv3021c	PPE47	GTT/GTG	234	V/V	Syn	Miscellaneous feature
mtbs3379757_C	3379757	696	A	C	1603	Rv3021c	PPE47	GCT/GCG	232	A/A	Syn	Miscellaneous feature
mtbs3379763_A	3379763	690	G	A	1621	Rv3021c	PPE47	GCC/GCT	230	A/A	Syn	Miscellaneous feature
mtbs3379788_G	3379788	665	C	G	1662	Rv3021c	PPE47	GGG/GCG	222	G/A	Nonsyn	Miscellaneous feature
mtbs3380534_G	3380534	149	A	G	698	Rv3022c	PPE48	GTG/GCG	50	V/A	Nonsyn	Miscellaneous feature
mtbs3401871_G	3401871	48	A	G	1464	Rv3041c		GCT/GCC	16	A/A	Syn	Coding region
mtbs3402816_T	3402816	347	C	T	1785	Rv3042c	serB2	GGA/GAA	116	G/E	Nonsyn	Coding region
mtbs3404376_G	3404376	546	C	G	1256	Rv3043c	ctaD	ACG/ACC	182	T/T	Syn	Coding region
mtbs3408150_C	3408150	157	T	C	778	Rv3047c		ACA/GCA	53	T/A	Nonsyn	Coding region
mtbs3412611_C	3412611	1556	T	C	748	Rv3051c	nrdE	CAG/CGG	519	Q/R	Nonsyn	Coding region
mtbs3420825_G	3420825	1334	A	G	999	Rv3059	cyp136	GAC/GGC	445	D/G	Nonsyn	Coding region
mtbs3425854_T	3425854	271	C	T	1995	Rv3062	ligB	CCG/TCG	91	P/S	Nonsyn	Coding region
mtbs3428917_A	3428917	1675	C	A	1906	Rv3063	cstA	CGT/AGT	559	R/S	Nonsyn	Coding region
mtbs3440464_G	3440464	924	T	G	2010	Rv3077		CGT/CGG	308	R/R	Syn	Coding region
mtbs3440468_C	3440468	928	G	C	2025	Rv3077		GGC/CGC	310	G/R	Nonsyn	Coding region
mtbs3446699_G	3446699	660	C	G	861	Rv3081		TTC/TTG	220	F/L	Nonsyn	Coding region
mtbs3447293_G	3447293	3447293	T	G	723
mtbs3450725_C	3450725	729	T	C	1414	Rv3084	lipR	GTT/GTC	243	V/V	Syn	Coding region
mtbs3455686_C	3455686	1347	G	C	1305	Rv3088	tgs4	CTG/CTC	449	L/L	Syn	Coding region
mtbs3456666_G	3456666	906	A	G	1987	Rv3089	fadD13	GCA/GCG	302	A/A	Syn	Coding region
mtbs3462135_C	3462135	630	G	C	2100	Rv3093c		TGC/TGG	210	C/W	Nonsyn	Coding region
mtbs3466919_G	3466919	173	C	G	986	Rv3097c	lipY	GGC/GCC	58	G/A	Nonsyn	Coding region
mtbs3477942_G	3477942	294	A	G	739	Rv3109	moaA1	ACA/ACG	98	T/T	Syn	Coding region
mtbs3480474_A	3480474	401	G	A	1198	Rv3113		GGA/GAA	134	G/E	Nonsyn	Coding region
mtbs3480789_C	3480789	31	T	C	1055	Rv3114		TCA/CCA	11	S/P	Nonsyn	Coding region
mtbs3482717_G	3482717	6	A	G	543			CGT/CGC	2	R/R	Syn	Repeat region
mtbs3486977_G	3486977	469	A	G	1848	Rv3121	cyp141	AAA/GAA	157	K/E	Nonsyn	Coding region
mtbs3498198_T	3498198	1068	C	T	745	Rv3132c	devS	GAG/GAA	356	E/E	Syn	Coding region
mtbs3500149_A	3500149	601	G	A	768	Rv3134c		CTG/TTG	201	L/L	Syn	Coding region
mtbs3500243_C	3500243	507	G	C	887	Rv3134c		GCC/GCG	169	A/A	Syn	Coding region
mtbs3503895_T	3503895	503	C	T	2024	Rv3137		CCG/CTG	168	P/L	Nonsyn	Coding region
mtbs3508970_G	3508970	876	A	G	866	Rv3141	fadB4	GAA/GAG	292	E/E	Syn	Coding region
mtbs3509626_A	3509626	3509626	C	A	722
mtbs3510120_G	3510120	1198	T	G	1062	Rv3144c	PPE52	AAG/CAG	400	K/Q	Nonsyn	Coding region
mtbs3518167_G	3518167	1422	A	G	2109	Rv3151	nuoG	ATA/ATG	474	I/M	Nonsyn	Coding region
mtbs3518555_G	3518555	1810	A	G	2090	Rv3151	nuoG	ACG/GCG	604	T/A	Nonsyn	Coding region
mtbs3529067_C	3529067	97	G	C	1182	Rv3159c	PPE53	CGT/GGT	33	R/G	Nonsyn	Coding region
mtbs3530955_G	3530955	184	C	G	1028	Rv3161c		GTC/CTC	62	V/L	Nonsyn	Coding region
mtbs3542049_A	3542049	3542049	G	A	738
mtbs3542219_A	3542219	82	G	A	737	Rv3174		GGT/AGT	28	G/S	Nonsyn	Coding region
mtbs3543031_A	3543031	172	G	A	539	Rv3175		GCC/ACC	58	A/T	Nonsyn	Coding region
mtbs3548984_C	3548984	3548984	T	C	64
mtbs3550347_T	3550347	3550347	C	T	733
mtbs3550789_G	3550789	75	C	G	780	Rv3183		GCC/GCG	25	A/A	Syn	Coding region
mtbs3556275_G	3556275	413	A	G	1757	Rv3190c		CTG/CCG	138	L/P	Nonsyn	Coding region
mtbs3570220_C	3570220	992	T	C	64	Rv3198c	uvrD2	GAG/GGG	331	E/G	Nonsyn	Coding region
mtbs3571828_C	3571828	716	G	C	752	Rv3199c	nudC	CCG/CGG	239	P/R	Nonsyn	Coding region
mtbs3577497_T	3577497	2704	C	T	790	Rv3202c		GAA/AAA	902	E/K	Nonsyn	Coding region
mtbs3581414_G	3581414	100	A	G	1904	Rv3204		ACA/GCA	34	T/A	Nonsyn	Coding region
mtbs3591063_C	3591063	430	T	C	1981	Rv3213c		AAG/GAG	144	K/E	Nonsyn	Coding region
mtbs3597249_G	3597249	286	C	G	768	Rv3220c		GGC/CGC	96	G/R	Nonsyn	Coding region
mtbs3597879_C	3597879	3597879	T	C	63
mtbs3600576_T	3600576	726	C	T	882	Rv3224		TGC/TGT	242	C/C	Syn	Coding region
mtbs3604821_C	3604821	96	G	C	2292	Rv3228		GCG/GCC	32	A/A	Syn	Coding region
mtbs3612813_C	3612813	304	T	C	811	Rv3236c		ACG/GCG	102	T/A	Nonsyn	Coding region
mtbs3614982_C	3614982	2622	T	C	1733	Rv3239c		CTA/CTG	874	L/L	Syn	Coding region
mtbs3622441_C	3622441	651	A	C	2130	Rv3243c		GTT/GTG	217	V/V	Syn	Coding region
mtbs3625065_G	3625065	1549	T	G	1951	Rv3245c	mtrB	ATG/CTG	517	M/L	Nonsyn	Coding region
mtbs3626562_A	3626562	52	G	A	876	Rv3245c	mtrB	CCG/TCG	18	P/S	Nonsyn	Coding region
mtbs3628520_A	3628520	1128	G	A	767	Rv3248c	sahH	TCC/TCT	376	S/S	Syn	Coding region
mtbs3638093_A	3638093	617	G	A	1035	Rv3257c	pmmA	TCG/TTG	206	S/L	Nonsyn	Coding region
mtbs3643985_C	3643985	809	A	C	745	Rv3263		GAG/GCG	270	E/A	Nonsyn	Coding region
mtbs3653988_A	3653988	541	G	A	917	Rv3272		GTG/ATG	181	V/M	Nonsyn	Coding region
mtbs3657759_T	3657759	331	C	T	64	Rv3274c	fadE25	GGC/AGC	111	G/S	Nonsyn	Coding region
mtbs3664457_A	3664457	239	C	A	749	Rv3282		GCC/GAC	80	A/D	Nonsyn	Coding region
mtbs3665753_A	3665753	826	G	A	761	Rv3283	sseA	GAG/AAG	276	E/K	Nonsyn	Coding region
mtbs3674157_A	3674157	556	T	A	865	Rv3293	pcd	TGC/AGC	186	C/S	Nonsyn	Coding region
mtbs3675504_T	3675504	492	G	T	734	Rv3294c		ATC/ATA	164	I/I	Syn	Coding region
mtbs3678249_C	3678249	1475	A	C	834	Rv3296	lhr	AAG/ACG	492	K/T	Nonsyn	Coding region
mtbs3680932_A	3680932	4158	G	A	851	Rv3296	lhr	CCG/CCA	1386	P/P	Syn	Coding region
mtbs3681548_C	3681548	229	A	C	1032	Rv3297	nei	AGG/CGG	77	R/R	Syn	Coding region
mtbs3689523_T	3689523	1416	G	T	2047	Rv3303c	lpdA	TGC/TGA	472	C/Stop	Nonsyn	Coding region
mtbs3690016_G	3690016	923	A	G	1099	Rv3303c	lpdA	TTG/TCG	308	L/S	Nonsyn	Coding region
mtbs3693681_C	3693681	309	A	C	1074	Rv3306c	amiB1	GCT/GCG	103	A/A	Syn	Coding region
mtbs3704596_C	3704596	160	G	C	1843	Rv3317	sdhD	GTG/CTG	54	V/L	Nonsyn	Coding region
mtbs3704770_G	3704770	334	A	G	803	Rv3317	sdhD	ACC/GCC	112	T/A	Nonsyn	Coding region
mtbs3714211_T	3714211	122	G	T	2014	Rv3328c	sigJ	CCG/CAG	41	P/Q	Nonsyn	Coding region
mtbs3714757_C	3714757	366	A	C	1812	Rv3329		CAA/CAC	122	Q/H	Nonsyn	Coding region
mtbs3718357_T	3718357	1268	C	T	2014	Rv3331	sugI	CCG/CTG	423	P/L	Nonsyn	Coding region
mtbs3721806_C	3721806	795	G	C	2028	Rv3335c		GGC/GGG	265	G/G	Syn	Coding region
mtbs3723401_A	3723401	231	G	A	64	Rv3336c	trpS	ATC/ATT	77	I/I	Syn	Coding region
mtbs3730466_G	3730466	6470	A	G	1186	Rv3343c	PPE54	ATC/ACC	2157	I/T	Nonsyn	Coding region
mtbs3730519_G	3730519	6417	C	G	1105	Rv3343c	PPE54	ACG/ACC	2139	T/T	Syn	Coding region
mtbs3730896_G	3730896	6040	A	G	18	Rv3343c	PPE54	TTG/CTG	2014	L/L	Syn	Coding region
mtbs3732310_A	3732310	4626	G	A	169	Rv3343c	PPE54	AAC/AAT	1542	N/N	Syn	Coding region
mtbs3732517_G	3732517	4419	A	G	717	Rv3343c	PPE54	ATT/ATC	1473	I/I	Syn	Coding region
mtbs3732525_T	3732525	4411	A	T	751	Rv3343c	PPE54	TTC/ATC	1471	F/I	Nonsyn	Coding region
mtbs3732553_G	3732553	4383	A	G	835	Rv3343c	PPE54	ATT/ATC	1461	I/I	Syn	Coding region
mtbs3732624_G	3732624	4312	A	G	1000	Rv3343c	PPE54	TTG/CTG	1438	L/L	Syn	Coding region
mtbs3736024_G	3736024	912	A	G	1092	Rv3343c	PPE54	GGT/GGC	304	G/G	Syn	Coding region
mtbs3736628_G	3736628	308	T	G	2307	Rv3343c	PPE54	GAG/GCG	103	E/A	Nonsyn	Coding region
mtbs3743656_A	3743656	3743656	G	A	746
mtbs3743899_A	3743899	9286	G	A	838	Rv3347c	PPE55	CTG/TTG	3096	L/L	Syn	Coding region
mtbs3746409_G	3746409	6776	A	G	1727	Rv3347c	PPE55	CTG/CCG	2259	L/P	Nonsyn	Coding region
mtbs3750177_T	3750177	3008	A	T	1030	Rv3347c	PPE55	TTC/TAC	1003	F/Y	Nonsyn	Coding region
mtbs3750178_C	3750178	3007	A	C	1033	Rv3347c	PPE55	TTC/GTC	1003	F/V	Nonsyn	Coding region
mtbs3750185_G	3750185	3000	C	G	970	Rv3347c	PPE55	TCG/TCC	1000	S/S	Syn	Coding region
mtbs3750187_T	3750187	2998	A	T	967	Rv3347c	PPE55	TCG/ACG	1000	S/T	Nonsyn	Coding region
mtbs3750188_G	3750188	2997	C	G	981	Rv3347c	PPE55	ATG/ATC	999	M/I	Nonsyn	Coding region
mtbs3750193_A	3750193	2992	G	A	992	Rv3347c	PPE55	CTC/TTC	998	L/F	Nonsyn	Coding region
mtbs3750205_T	3750205	2980	C	T	1059	Rv3347c	PPE55	GAC/AAC	994	D/N	Nonsyn	Coding region
mtbs3750209_G	3750209	2976	A	G	1065	Rv3347c	PPE55	AAT/AAC	992	N/N	Syn	Coding region
mtbs3750210_G	3750210	2975	T	G	1062	Rv3347c	PPE55	AAT/ACT	992	N/T	Nonsyn	Coding region
mtbs3752207_G	3752207	978	A	G	1588	Rv3347c	PPE55	ATT/ATC	326	I/I	Syn	Coding region
mtbs3753116_T	3753116	69	C	T	1513	Rv3347c	PPE55	CCG/CCA	23	P/P	Syn	Coding region
mtbs3753164_G	3753164	21	T	G	1627	Rv3347c	PPE55	CCA/CCC	7	P/P	Syn	Coding region
mtbs3754508_C	3754508	526	G	C	752	Rv3349c		CTC/GTC	176	L/V	Nonsyn	Coding region
mtbs3761169_T	3761169	5934	C	T	538	Rv3350c	PPE56	GCG/GCA	1978	A/A	Syn	Coding region
mtbs3761191_G	3761191	5912	A	G	780	Rv3350c	PPE56	GTC/GCC	1971	V/A	Nonsyn	Coding region
mtbs3762013_C	3762013	5090	A	C	767	Rv3350c	PPE56	CTC/CGC	1697	L/R	Nonsyn	Coding region
mtbs3775409_C	3775409	2093	T	C	853	Rv3365c		CAG/CGG	698	Q/R	Nonsyn	Coding region
mtbs3775441_C	3775441	2061	A	C	874	Rv3365c		AGT/AGG	687	S/R	Nonsyn	Coding region
mtbs3777389_A	3777389	113	G	A	64	Rv3365c		CCG/CTG	38	P/L	Nonsyn	Coding region
mtbs3778011_A	3778011	275	G	A	832	Rv3366	spoU	CGG/CAG	92	R/Q	Nonsyn	Coding region
mtbs3778012_T	3778012	276	G	T	834	Rv3366	spoU	CGG/CGT	92	R/R	Syn	Coding region
mtbs3778396_T	3778396	3778396	C	T	730
mtbs3798095_C	3798095	395	A	C	1894	Rv3383c	idsB	GTC/GGC	132	V/G	Nonsyn	Coding region
mtbs3804299_A	3804299	493	G	A	815	Rv3389c	htdY	CCC/TCC	165	P/S	Nonsyn	Coding region
mtbs3811672_T	3811672	3811672	G	T	719
mtbs3811675_G	3811675	3811675	A	G	718
mtbs3817117_A	3817117	989	C	A	2122	Rv3399		GCG/GAG	330	A/E	Nonsyn	Coding region
mtbs3821845_T	3821845	47	G	T	873	Rv3402c		GCA/GAA	16	A/E	Nonsyn	Coding region
mtbs3823159_T	3823159	705	A	T	1855	Rv3403c		GTT/GTA	235	V/V	Syn	Coding region
mtbs3826501_T	3826501	250	C	T	728	Rv3407	vapB47	CGC/TGC	84	R/C	Nonsyn	Coding region
mtbs3826684_T	3826684	137	C	T	1888	Rv3408	vapC47	TCG/TTG	46	S/L	Nonsyn	Coding region
mtbs3829770_C	3829770	141	T	C	1930	Rv3410c	guaB3	CCA/CCG	47	P/P	Syn	Coding region
mtbs3830349_T	3830349	1171	C	T	849	Rv3411c	guaB2	GCG/ACG	391	A/T	Nonsyn	Coding region
mtbs3830695_G	3830695	825	A	G	1060	Rv3411c	guaB2	GCT/GCC	275	A/A	Syn	Coding region
mtbs3834486_C	3834486	36	T	C	738	Rv3415c		CAA/CAG	12	Q/Q	Syn	Coding region
mtbs3838871_G	3838871	192	A	G	2070	Rv3420c	rimI	GCT/GCC	64	A/A	Syn	Coding region
mtbs3841790_G	3841790	287	A	G	631	Rv3424c		GTG/GCG	96	V/A	Nonsyn	Coding region
mtbs3842620_G	3842620	382	A	G	1378	Rv3425	PPE57	ACT/GCT	128	T/A	Nonsyn	Coding region
mtbs3842625_G	3842625	387	A	G	1390	Rv3425	PPE57	CCA/CCG	129	P/P	Syn	Coding region
mtbs3844992_A	3844992	979	T	A	1472			AGC/TGC	327	S/C	Nonsyn	Mobile element
mtbs3845695_T	3845695	276	C	T	1043			CGG/CGA	92	R/R	Syn	Mobile element
mtbs3846791_G	3846791	3846791	A	G	742
mtbs3846857_A	3846857	3846857	G	A	277
mtbs3846860_G	3846860	3846860	T	G	237
mtbs3846866_A	3846866	3846866	C	A	135
mtbs3846886_T	3846886	3846886	A	T	10
mtbs3846897_G	3846897	3846897	T	G	29
mtbs3846923_G	3846922	3846922	A	G	1			NULL		NULL	NULL
mtbs3846926_G	3846925	3846925	C	G	1			NULL		NULL	NULL
mtbs3846946_G	3846946	3846946	A	G	15
mtbs3846947_C	3846947	3846947	G	C	15
mtbs3846957_A	3846957	3846957	C	A	13
mtbs3846968_C	3846968	3846968	T	C	15
mtbs3846971_A	3846971	3846971	C	A	14
mtbs3846972_A	3846972	3846972	G	A	13
mtbs3846976_C	3846976	3846976	A	C	12
mtbs3846982_T	3846982	3846982	C	T	9
mtbs3846986_T	3846986	3846986	G	T	6
mtbs3847003_G	3847002	3847002	T	G	1			NULL		NULL	NULL
mtbs3847010_C	3847010	3847010	G	C	5
mtbs3847014_G	3847014	3847014	C	G	8
mtbs3847022_C	3847022	3847022	T	C	10
mtbs3847235_T	3847235	71	C	T	737	Rv3429	PPE59	TCT/TTT	24	S/F	Nonsyn	Coding region
mtbs3847237_T	3847237	73	G	T	733	Rv3429	PPE59	GCC/TCC	25	A/S	Nonsyn	Coding region
mtbs3847238_T	3847238	74	C	T	733	Rv3429	PPE59	GCC/GTC	25	A/V	Nonsyn	Coding region
mtbs3847684_A	3847684	520	G	A	104	Rv3429	PPE59	GGG/AGG	174	G/R	Nonsyn	Coding region
mtbs3851887_C	3851887	1327	A	C	1132	Rv3433c		TCG/GCG	443	S/A	Nonsyn	Coding region
mtbs3851888_C	3851888	1326	T	C	1132	Rv3433c		GCA/GCG	442	A/A	Syn	Coding region
mtbs3857226_T	3857226	316	G	T	65	Rv3437		GAC/TAC	106	D/Y	Nonsyn	Coding region
mtbs3859893_T	3859893	84	C	T	2083	Rv3440c		GAG/GAA	28	E/E	Syn	Coding region
mtbs3863138_A	3863138	127	G	A	788	Rv3445c	esxU	CCG/TCG	43	P/S	Nonsyn	Coding region
mtbs3864995_C	3864995	3244	T	C	1812	Rv3447c	eccC4	AGC/GGC	1082	S/G	Nonsyn	Coding region
mtbs3871246_C	3871246	1251	T	C	1187	Rv3450c	eccB4	GGA/GGG	417	G/G	Syn	Coding region
mtbs3877421_G	3877421	12	A	G	1866	Rv3456c	rplQ	CCT/CCC	4	P/P	Syn	Coding region
mtbs3883178_C	3883178	345	A	C	733	Rv3465	rmlC	GAA/GAC	115	E/D	Nonsyn	Coding region
mtbs3883796_T	3883796	247	G	T	839			GGC/TGC	83	G/C	Nonsyn	Repeat region
mtbs3883797_A	3883797	248	G	A	851			GGC/GAC	83	G/D	Nonsyn	Repeat region
mtbs3884906_G	3884906	943	A	G	1562	Rv3467		AAA/GAA	315	K/E	Nonsyn	Coding region
mtbs3885886_C	3885886	184	T	C	1895	Rv3468c		ATC/GTC	62	I/V	Nonsyn	Coding region
mtbs3892671_G	3892671	1050	A	G	1847	Rv3476c	kgtP	GTT/GTC	350	V/V	Syn	Coding region
mtbs3893480_A	3893480	241	G	A	1056	Rv3476c	kgtP	CTT/TTT	81	L/F	Nonsyn	Coding region
mtbs3895585_T	3895585	1160	C	T	813	Rv3478	PPE60	CCC/CTC	387	P/L	Nonsyn	Coding region
mtbs3895727_A	3895727	3895727	C	A	940
mtbs3896340_G	3896340	521	T	G	1950	Rv3479		CTC/CGC	174	L/R	Nonsyn	Coding region
mtbs3898408_G	3898408	2589	A	G	1946	Rv3479		GCA/GCG	863	A/A	Syn	Coding region
mtbs3906311_A	3906311	697	G	A	752	Rv3487c	lipF	CGT/TGT	233	R/C	Nonsyn	Coding region
mtbs3908465_G	3908465	230	A	G	787	Rv3490	otsA	GAA/GGA	77	E/G	Nonsyn	Coding region
mtbs3909235_C	3909235	1000	G	C	1070	Rv3490	otsA	GTG/CTG	334	V/L	Nonsyn	Coding region
mtbs3916386_T	3916386	571	G	T	733	Rv3497c	mce4C	CGT/AGT	191	R/S	Nonsyn	Coding region
mtbs3926151_A	3926151	1262	C	A	82	Rv3506	fadD17	CCG/CAG	421	P/Q	Nonsyn	Coding region
mtbs3952800_A	3952800	257	G	A	2021	Rv3516	echA19	GGC/GAC	86	G/D	Nonsyn	Coding region
mtbs3958403_G	3958403	883	A	G	1780	Rv3521		AAC/GAC	295	N/D	Nonsyn	Coding region
mtbs3959418_T	3959418	971	C	T	1920	Rv3522	ltp4	ACC/ATC	324	T/I	Nonsyn	Coding region
mtbs3959730_C	3959730	202	T	C	834	Rv3523	ltp3	TTC/CTC	68	F/L	Nonsyn	Coding region
mtbs3962187_A	3962187	138	G	A	779	Rv3525c		GAC/GAT	46	D/D	Syn	Coding region
mtbs3964518_A	3964518	675	G	A	753	Rv3528c		CCC/CCT	225	P/P	Syn	Coding region
mtbs3968006_C	3968006	939	A	C	744	Rv3531c		TTT/TTG	313	F/L	Nonsyn	Coding region
mtbs3970594_G	3970594	3970594	C	G	741
mtbs3976595_T	3976595	1227	G	T	749	Rv3537	kstD	AGG/AGT	409	R/S	Nonsyn	Coding region
mtbs3979990_G	3979990	670	C	G	796	Rv3540c	ltp2	GTG/CTG	224	V/L	Nonsyn	Coding region
mtbs3981983_A	3981983	1158	G	A	862	Rv3543c	fadE29	CCC/CCT	386	P/P	Syn	Coding region
mtbs3982279_C	3982279	862	T	C	64	Rv3543c	fadE29	ATC/GTC	288	I/V	Nonsyn	Coding region
mtbs3983271_G	3983271	874	T	G	486	Rv3544c	fadE28	ATC/CTC	292	I/L	Nonsyn	Coding region
mtbs3993058_A	3993058	374	G	A	834	Rv3554	fdxB	GGG/GAG	125	G/E	Nonsyn	Coding region
mtbs4001622_C	4001622	4001622	T	C	750
mtbs4005114_C	4005114	824	G	C	1100	Rv3563	fadE32	TGG/TCG	275	W/S	Nonsyn	Coding region
mtbs4005607_C	4005607	361	T	C	1951	Rv3564	fadE33	TTG/CTG	121	L/L	Syn	Coding region
mtbs4008747_G	4008747	536	A	G	1024	Rv3567c	hsaB	ATC/ACC	179	I/T	Nonsyn	Coding region
mtbs4022388_A	4022388	6	G	A	788	Rv3579c		CCC/CCT	2	P/P	Syn	Coding region
mtbs4024273_C	4024273	75	T	C	1926	Rv3581c	ispF	GTA/GTG	25	V/V	Syn	Coding region
mtbs4026899_A	4026899	456	G	A	2059	Rv3585	radA	CAG/CAA	152	Q/Q	Syn	Coding region
mtbs4028752_G	4028752	862	A	G	1001	Rv3586		ACG/GCG	288	T/A	Nonsyn	Coding region
mtbs4031277_A	4031277	785	G	A	23	Rv3589	mutY	CGG/CAG	262	R/Q	Nonsyn	Coding region
mtbs4032625_T	4032625	534	G	T	873	Rv3590c	PE_PGRS58	GGC/GGA	178	G/G	Syn	Coding region
mtbs4034827_T	4034827	476	C	T	2096	Rv3593	lpqF	GCG/GTG	159	A/V	Nonsyn	Coding region
mtbs4037283_G	4037283	768	T	G	2096	Rv3595c	PE_PGRS59	GGA/GGC	256	G/G	Syn	Coding region
mtbs4041581_T	4041581	1360	C	T	756	Rv3598c	lysS	GCG/ACG	454	A/T	Nonsyn	Coding region
mtbs4050811_A	4050811	2073	G	A	848	Rv3610c	ftsH	TAC/TAT	691	Y/Y	Syn	Coding region
mtbs4055801_A	4055801	575	G	A	1855	Rv3616c	espA	ACC/ATC	192	T/I	Nonsyn	Coding region
mtbs4056416_A	4056416	4056416	C	A	899
mtbs4056693_T	4056693	4056693	G	T	722
mtbs4059143_C	4059143	446	A	C	850	Rv3618		GAG/GCG	149	E/A	Nonsyn	Coding region
mtbs4059904_G	4059904	4059904	A	G	1933
mtbs4060100_A	4060100	169	G	A	1274	Rv3619c	esxV	CTG/TTG	57	L/L	Syn	Coding region
mtbs4060201_A	4060201	68	G	A	1259	Rv3619c	esxV	TCG/TTG	23	S/L	Nonsyn	Coding region
mtbs4060210_A	4060210	59	T	A	1258	Rv3619c	esxV	CAG/CTG	20	Q/L	Nonsyn	Coding region
mtbs4060230_A	4060230	39	G	A	1233	Rv3619c	esxV	CAC/CAT	13	H/H	Syn	Coding region
mtbs4060588_C	4060588	4	T	C	779	Rv3620c	esxW	ACC/GCC	2	T/A	Nonsyn	Coding region
mtbs4068468_A	4068468	587	C	A	533	Rv3629c		GGT/GTT	196	G/V	Nonsyn	Coding region
mtbs4069292_A	4069292	118	G	A	1901	Rv3630		GCC/ACC	40	A/T	Nonsyn	Coding region
mtbs4078700_A	4078700	1050	G	A	23	Rv3640c		TCC/TCT	350	S/S	Syn	Coding region
mtbs4089058_C	4089058	278	T	C	1045	Rv3649		CTC/CCC	93	L/P	Nonsyn	Coding region
mtbs4095295_C	4095295	6	T	C	1026	Rv3655c		GAA/GAG	2	E/E	Syn	Coding region
mtbs4100975_C	4100975	4100975	T	C	1978
mtbs4107074_C	4107074	11	T	C	1010	Rv3666c	dppA	CAG/CGG	4	Q/R	Nonsyn	Coding region
mtbs4111303_C	4111303	477	G	C	1899	Rv3669		GTG/GTC	159	V/V	Syn	Coding region
mtbs4112429_C	4112429	1087	T	C	1005	Rv3671c		ATC/GTC	363	I/V	Nonsyn	Coding region
mtbs4121112_A	4121112	4121112	C	A	521
mtbs4122287_T	4122287	372	G	T	887	Rv3682	ponA2	GCG/GCT	124	A/A	Syn	Coding region
mtbs4123770_A	4123770	1855	G	A	832	Rv3682	ponA2	GCG/ACG	619	A/T	Nonsyn	Coding region
mtbs4137829_T	4137829	624	C	T	809	Rv3695		GCC/GCT	208	A/A	Syn	Coding region
mtbs4156099_A	4156099	631	C	A	2046	Rv3711c	dnaQ	GTG/TTG	211	V/L	Nonsyn	Coding region
mtbs4156503_T	4156503	227	C	T	1053	Rv3711c	dnaQ	GGC/GAC	76	G/D	Nonsyn	Coding region
mtbs4158493_T	4158493	267	C	T	781	Rv3713	cobQ2	ATC/ATT	89	I/I	Syn	Coding region
mtbs4159195_C	4159195	627	T	C	1477	Rv3714c		CCA/CCG	209	P/P	Syn	Coding region
mtbs4160371_A	4160371	130	C	A	753	Rv3715c	recR	GGT/TGT	44	G/C	Nonsyn	Coding region
mtbs4162339_G	4162339	34	A	G	1888	Rv3719		ACG/GCG	12	T/A	Nonsyn	Coding region
mtbs4166441_A	4166441	291	G	A	913	Rv3721c	dnaZX	CAC/CAT	97	H/H	Syn	Coding region
mtbs4167656_G	4167656	473	A	G	759	Rv3722c		ATG/ACG	158	M/T	Nonsyn	Coding region
mtbs4169852_T	4169852	247	G	T	865	Rv3724B	cut5b	GCG/TCG	83	A/S	Nonsyn	Coding region
mtbs4170739_C	4170739	526	G	C	978	Rv3725		GTC/CTC	176	V/L	Nonsyn	Coding region
mtbs4174131_C	4174131	1177	G	C	745	Rv3727		GGA/CGA	393	G/R	Nonsyn	Coding region
mtbs4179089_T	4179089	805	C	T	1000	Rv3729		CCG/TCG	269	P/S	Nonsyn	Coding region
mtbs4179832_C	4179832	1548	G	C	758	Rv3729		CAG/CAC	516	Q/H	Nonsyn	Coding region
mtbs4182695_A	4182695	938	G	A	1918	Rv3731	ligC	CGC/CAC	313	R/H	Nonsyn	Coding region
mtbs4186678_A	4186678	45	G	A	779	Rv3736		CTG/CTA	15	L/L	Syn	Coding region
mtbs4187485_C	4187485	852	T	C	1818	Rv3736		GCT/GCC	284	A/A	Syn	Coding region
mtbs4187817_G	4187817	119	A	G	2106	Rv3737		GAT/GGT	40	D/G	Nonsyn	Coding region
mtbs4189210_T	4189210	1512	G	T	857	Rv3737		CCG/CCT	504	P/P	Syn	Coding region
mtbs4204168_C	4204168	250	T	C	766	Rv3758c	proV	AAC/GAC	84	N/D	Nonsyn	Coding region
mtbs4204441_G	4204441	933	A	G	1835	Rv3759c	proX	CAT/CAC	311	H/H	Syn	Coding region
mtbs4205325_G	4205325	49	A	G	780	Rv3759c	proX	TGG/CGG	17	W/R	Nonsyn	Coding region
mtbs4210274_G	4210274	736	A	G	1945	Rv3764c	tcrY	TGT/CGT	246	C/R	Nonsyn	Coding region
mtbs4214988_A	4214988	4214988	G	A	713
mtbs4215433_T	4215433	343	C	T	692	Rv3770c		GCG/ACG	115	A/T	Nonsyn	Coding region
mtbs4215484_C	4215484	292	G	C	977	Rv3770c		CCC/GCC	98	P/A	Nonsyn	Coding region
mtbs4217557_G	4217557	424	A	G	966	Rv3772	hisC2	ACG/GCG	142	T/A	Nonsyn	Coding region
mtbs4218416_A	4218416	410	C	A	756	Rv3773c		GGG/GTG	137	G/V	Nonsyn	Coding region
mtbs4218941_A	4218941	93	G	A	745	Rv3774	echA21	GGG/GGA	31	G/G	Syn	Coding region
mtbs4221490_G	4221490	402	C	G	2030	Rv3776		CTC/CTG	134	L/L	Syn	Coding region
mtbs4222073_G	4222073	985	A	G	2230	Rv3776		ATG/GTG	329	M/V	Nonsyn	Coding region
mtbs4222882_G	4222882	189	A	G	1979	Rv3777		CTA/CTG	63	L/L	Syn	Coding region
mtbs4223172_C	4223172	479	T	C	1523	Rv3777		GTC/GCC	160	V/A	Nonsyn	Coding region
mtbs4229167_C	4229167	821	T	C	856	Rv3782	glfT1	GTG/GCG	274	V/A	Nonsyn	Coding region
mtbs4234960_C	4234960	181	A	C	774	Rv3788		ATC/CTC	61	I/L	Nonsyn	Coding region
mtbs4236237_T	4236237	459	C	T	750	Rv3790	dprE1	ACC/ACT	153	T/T	Syn	Coding region
mtbs4238675_T	4238675	744	C	T	537	Rv3792	aftA	GGC/GGT	248	G/G	Syn	Coding region
mtbs4242643_T	4242643	2781	C	T	2135	Rv3793	embC	CGC/CGT	927	R/R	Syn	Coding region
mtbs4243460_T	4243460	228	C	T	780	Rv3794	embA	TGC/TGT	76	C/C	Syn	Coding region
mtbs4247429_G	4247429	916	A	G	151	Rv3795	embB	ATG/GTG	306	M/V	Nonsyn	Coding region
mtbs4251297_C	4251297	213	G	C	980	Rv3797	fadE35	GGG/GGC	71	G/G	Syn	Coding region
mtbs4252066_C	4252066	982	T	C	773	Rv3797	fadE35	TCG/CCG	328	S/P	Nonsyn	Coding region
mtbs4254039_C	4254039	104	T	C	579			GTA/GCA	35	V/A	Nonsyn	Sequence-Tagged Site
mtbs4255922_G	4255922	27	A	G	1913	Rv3799c	accD4	CAT/CAC	9	H/H	Syn	Coding region
mtbs4256210_T	4256210	4937	G	T	803	Rv3800c	pks13	GCC/GAC	1646	A/D	Nonsyn	Coding region
mtbs4257220_G	4257220	3927	A	G	1782	Rv3800c	pks13	CGT/CGC	1309	R/R	Syn	Coding region
mtbs4258106_A	4258106	3041	G	A	739	Rv3800c	pks13	ACG/ATG	1014	T/M	Nonsyn	Coding region
mtbs4262388_T	4262388	679	C	T	860	Rv3801c	fadD32	GGC/AGC	227	G/S	Nonsyn	Coding region
mtbs4267647_C	4267647	1190	T	C	867	Rv3805c	aftB	GAC/GGC	397	D/G	Nonsyn	Coding region
mtbs4280708_A	4280708	81	G	A	782	Rv3815c		GTC/GTT	27	V/V	Syn	Coding region
mtbs4284429_A	4284429	1397	G	A	739	Rv3820c	papA2	CCA/CTA	466	P/L	Nonsyn	Coding region
mtbs4287164_G	4287164	444	A	G	959	Rv3822		GGA/GGG	148	G/G	Syn	Coding region
mtbs4290135_T	4290135	1395	C	T	741	Rv3823c	mmpL8	CTG/CTA	465	L/L	Syn	Coding region
mtbs4293072_A	4293072	103	G	A	461	Rv3824c	papA1	CTT/TTT	35	L/F	Nonsyn	Coding region
mtbs4296015_A	4296015	3591	G	A	1220	Rv3825c	pks2	GAC/GAT	1197	D/D	Syn	Coding region
mtbs4301075_C	4301075	1264	G	C	763	Rv3826	fadD23	GAA/CAA	422	E/Q	Nonsyn	Coding region
mtbs4302036_C	4302036	754	T	C	1983	Rv3827c		ACG/GCG	252	T/A	Nonsyn	Coding region
mtbs4306155_T	4306155	399	C	T	1939	Rv3831		AGC/AGT	133	S/S	Syn	Coding region
mtbs4307179_A	4307179	313	G	A	1824	Rv3833		GTC/ATC	105	V/I	Nonsyn	Coding region
mtbs4308395_A	4308395	520	G	A	788	Rv3834c	serS	CTG/TTG	174	L/L	Syn	Coding region
mtbs4309927_G	4309927	881	T	G	796	Rv3835		CTC/CGC	294	L/R	Nonsyn	Coding region
mtbs4311664_T	4311664	44	C	T	764	Rv3837c		GGC/GAC	15	G/D	Nonsyn	Coding region
mtbs4313128_T	4313128	364	C	T	1024	Rv3839		CCC/TCC	122	P/S	Nonsyn	Coding region
mtbs4314645_G	4314645	468	A	G	1282	Rv3841	bfrB	CTA/CTG	156	L/L	Syn	Coding region
mtbs4314800_A	4314800	3	G	A	907	RVnc0044	ncrMT3949	GTG/GTA	1	V/V	Syn	Non-coding RNA
mtbs4319985_C	4319985	4319985	G	C	739
mtbs4325029_C	4325029	4325029	T	C	81
mtbs4326533_A	4326533	941	G	A	18	Rv3854c	ethA	ACC/ATC	314	T/I	Nonsyn	Coding region
mtbs4329782_A	4329782	4329782	G	A	922
mtbs4338732_A	4338732	4338732	G	A	1656
mtbs4340028_C	4340028	4340028	G	C	753
mtbs4350305_A	4350305	1479	G	A	777	Rv3871	eccCb1	CCG/CCA	493	P/P	Syn	Coding region
mtbs4351039_T	4351039	295	G	T	1887	Rv3872	PE35	GAA/TAA	99	E/Stop	Nonsyn	Coding region
mtbs4356110_C	4356110	1104	G	C	1877	Rv3877	eccD1	CTG/CTC	368	L/L	Syn	Coding region
mtbs4357597_G	4357597	2186	C	G	1397	Rv3879c	espK	TGC/TCC	729	C/S	Nonsyn	Coding region
mtbs4357804_G	4357804	1979	T	G	777	Rv3879c	espK	GAG/GCG	660	E/A	Nonsyn	Coding region
mtbs4359653_T	4359653	130	C	T	763	Rv3879c	espK	GAT/AAT	44	D/N	Nonsyn	Coding region
mtbs4359828_A	4359828	4359828	G	A	732
mtbs4361799_G	4361799	127	T	G	81	Rv3881c	espB	AAA/CAA	43	K/Q	Nonsyn	Coding region
mtbs4362568_G	4362568	853	T	G	823	Rv3882c	eccE1	AGA/CGA	285	R/R	Syn	Coding region
mtbs4366195_C	4366195	644	T	C	1455	Rv3884c	eccA2	GAG/GGG	215	E/G	Nonsyn	Coding region
mtbs4366272_C	4366272	567	G	C	2093	Rv3884c	eccA2	GCC/GCG	189	A/A	Syn	Coding region
mtbs4368084_C	4368084	438	G	C	841	Rv3885c	eccE2	GTC/GTG	146	V/V	Syn	Coding region
mtbs4372353_C	4372353	354	G	C	1031	Rv3888c		CGC/CGG	118	R/R	Syn	Coding region
mtbs4375628_T	4375628	56	G	T	1878	Rv3892c	PPE69	ACG/AAG	19	T/K	Nonsyn	Coding region
mtbs4378504_C	4378504	1949	T	C	747	Rv3894c	eccC2	GAT/GGT	650	D/G	Nonsyn	Coding region
mtbs4379680_G	4379680	773	C	G	1965	Rv3894c	eccC2	CGC/CCC	258	R/P	Nonsyn	Coding region
mtbs4382054_C	4382054	798	T	C	2088	Rv3896c		GCA/GCG	266	A/A	Syn	Coding region
mtbs4382275_T	4382275	577	G	T	2041	Rv3896c		CAA/AAA	193	Q/K	Nonsyn	Coding region
mtbs4386228_C	4386228	81	T	C	1361	Rv3900c		CTA/CTG	27	L/L	Syn	Coding region
mtbs4393178_G	4393178	4393178	A	G	1287
mtbs4393590_G	4393590	142	C	G	790	Rv3908	mutT4	CGG/GGG	48	R/G	Nonsyn	Coding region
mtbs4397736_T	4397736	1140	C	T	877	Rv3910		ATC/ATT	380	I/I	Syn	Coding region
mtbs4407588_C	4407588	615	T	C	1009	Rv3919c	gid	GCA/GCG	205	A/A	Syn	Coding region
mtbs4407927_G	4407927	276	T	G	772	Rv3919c	gid	GAA/GAC	92	E/D	Nonsyn	Coding region
mtbs4408923_T	4408923	4408923	C	T	962

## Sheet: 1410_indel
Supplementary Material
Genomic analysis of multidrug resistant Mycobacterium tuberculosis strains from patients in Kazakhstan
Supplementary file S5 – List of genetic variants (SNPs and Indels) filtered by GMTV database.
5_1410.vcf
INDEL ID	Position in genome	Position in gene	Ref	Alt	# of samples	Locus tag	Gene	Frameshift	Genome Region
	1450856	159	AC	A	0	Rv1295	thrC	NO	Coding region
	2088581	937	AG	A	0	Rv1840c	PE_PGRS34	NO	Coding region
	2361846	1606	AC	A	0	Rv2101	helZ	NO	Coding region
	2728464	383	AC	A	0	Rv2432c		NO	Coding region
	3042541	3042541	AATG	A	0			YES	intergenic
mtbi0338788-2	338788	285	AGGTG	A	1	Rv0279c	PE_PGRS4	NO	Coding region
mtbi0368087-3	368087	4677	AGCTGCCGGTGTTGAT	A	1	Rv0304c	PPE5	YES	Coding region
mtbi0888992_2	888992	888992	AACCTCAACACCCCCTCAAGTGAAGGAGG	A	20			NO
mtbi0916688-5	916688	958	AGC	A	1	Rv0823c		NO	Coding region
mtbi1252053-4	1252053	432	AG	A	1			NO	Repeat region
mtbi1619100-2	1619100	584	ACCGGCTCCACCGGCGCCG	A	1	Rv1441c	PE_PGRS26	YES	Coding region
mtbi2094911-2	2094911	277	ACAGCGT	A	1	Rv1844c	gnd1	YES	Coding region
mtbi2406842_1	2406842	2	AC	A	650	Rv2147c		NO	Coding region
mtbi2881597-2	2881597	188	AG	A	1	Rv2561		NO	Coding region
mtbi3331361-2	3331361	251	ACG	A	1	Rv2975c		NO	Coding region
mtbi3415180-2	3415180	3415180	ACACCTAGGGGGTGG	A	1			NO
mtbi3846881-1	3846881	3846881	AT	A	1			NO
mtbi3846915-1	3846915	3846915	AG	A	1			NO
mtbi3874722-3	3874722	318	AT	A	1	Rv3453		NO	Coding region
mtbi4221070-2	4221070	4221070	AC	A	1			NO
mtbi4322039-3	4322039	501	AC	A	1	Rv3847		NO	Coding region
mtbi4400660-3	4400660	474	AC	A	1	Rv3911	sigM	NO	Coding region
	2399943	385	A	AC	0	Rv2140c	TB18.6	NO	Coding region
	2803192	3044	A	AC	0	Rv2490c	PE_PGRS43	NO	Coding region
mtbi2338194-11	2338194	311	A	AC	1	Rv2081c		NO	Coding region
mtbi3610391_1	3610391	799	A	AC	879	Rv3234c	tgs3	NO	Coding region
mtbi0336694-1	336694	2379	A	ACACCGCC	1	Rv0279c	PE_PGRS4	NO	Coding region
mtbi2704884-26	2704884	187	A	ACAGCGACCATATCGCCGAGCT	1	Rv2407		YES	Coding region
mtbi2137521-6	2137521	558	A	ACTCCGATCAC	1	Rv1888c		NO	Coding region
mtbi1313337_1	1313337	1313337	A	AG	1891			NO
mtbi0968426-2	968426	1818	A	AGCCGGGTTG	1	Rv0872c	PE_PGRS15	YES	Coding region
mtbi2342649-8	2342649	841	A	AGGCGTACACAC	1	Rv2084		NO	Coding region
	1361405	396	A	AT	0	Rv1217c		NO	Coding region
	1689848	72	A	AT	0	Rv1498c		NO	Coding region
mtbi3902318-2	3902318	494	A	AT	1	Rv3483c		NO	Coding region
mtbi0336562-1	336562	2511	A	ATGG	1	Rv0279c	PE_PGRS4	YES	Coding region
	1633299	1328	CG	C	0	Rv1450c	PE_PGRS27	NO	Coding region
	1633307	1320	CG	C	0	Rv1450c	PE_PGRS27	NO	Coding region
	2215319	62	CGTGCT	C	0	Rv1971	mce3F	NO	Coding region
	2693617	818	CG	C	0	Rv2396	PE_PGRS41	NO	Coding region
	2693635	836	CG	C	0	Rv2396	PE_PGRS41	NO	Coding region
	2804148	2088	CACCGCCCTTGCCGCCGTTCGCGCCAGCCACGGTGGCGTCGGCGCCGTT	C	0	Rv2490c	PE_PGRS43	YES	Coding region
mtbi0104940-1	104940	275	CTGG	C	1	Rv0095c		YES	Coding region
mtbi0336686-1	336686	2387	CGA	C	1	Rv0279c	PE_PGRS4	NO	Coding region
mtbi0336690-1	336690	2383	CT	C	1	Rv0279c	PE_PGRS4	NO	Coding region
mtbi0485810-3	485810	79	CA	C	1	Rv0405	pks6	NO	Coding region
mtbi0916685-2	916685	961	CG	C	1	Rv0823c		NO	Coding region
mtbi1034208-2	1034208	423	CGCT	C	1	Rv0927c		YES	Coding region
mtbi1413129-2	1413129	95	CG	C	1	RVnc0013	mcr11	NO	Non-coding RNA
mtbi1756358-2	1756358	913	CG	C	1	Rv1551	plsB1	NO	Coding region
mtbi1955760-2	1955760	1485	CGAA	C	1	Rv1730c		YES	Coding region
mtbi1955913-11	1955913	1332	CCCGGAAG	C	1	Rv1730c		NO	Coding region
mtbi2153725-2	2153725	157	CTCATCCCCGTCTCG	C	1	Rv1907c		NO	Coding region
mtbi2525722-2	2525722	157	CG	C	1	Rv2251		NO	Coding region
mtbi2851164_1	2851164	74	CATT	C	268	Rv2526	vapB17	YES	Coding region
mtbi3215622_1	3215622	3215622	CG	C	713			NO
mtbi3238119-3	3238119	380	CGTG	C	1	Rv2923c		YES	Coding region
mtbi3379732-1	3379732	720	CCA	C	1	Rv3021c	PPE47	NO	Miscellaneous feature
mtbi3580636-2	3580636	3580636	CT	C	1			NO
mtbi3843407-2	3843407	371	CG	C	1	Rv3426	PPE58	NO	Coding region
mtbi3846843-4	3846843	3846843	CAAA	C	1			YES
mtbi3846852-1	3846852	3846852	CT	C	1			NO
mtbi3846988-1	3846988	3846988	CACCGGGTTAG	C	1			NO
mtbi3847000-1	3847000	3847000	CA	C	1			NO
mtbi3987370-2	3987370	3987370	CG	C	1			NO
mtbi4095001_1	4095001	300	CG	C	1963	Rv3655c		NO	Coding region
mtbi4198611-2	4198611	4198611	CG	C	1			NO
mtbi4379044-2	4379044	1408	CG	C	1	Rv3894c	eccC2	NO	Coding region
mtbi2632341-2	2632341	2632341	C	CA	1			NO
mtbi3379724-2	3379724	728	C	CA	1	Rv3021c	PPE47	NO	Miscellaneous feature
mtbi3379736-1	3379736	716	C	CA	1	Rv3021c	PPE47	NO	Miscellaneous feature
mtbi3846850-1	3846850	3846850	C	CA	1			NO
mtbi3846928-1	3846928	3846928	C	CA	1			NO
mtbi2990584-8	2990584	1293	C	CAGCGGTGATCGCAAGCGCGGCGAGCCGGGCGCAGCGGGTCACCGCCATCGGGACT	1	Rv2673	aftC	NO	Coding region
mtbi1907459-4	1907459	1907459	C	CAGTCGGGTGACGATGCGGGCCGGTGTGGTCCGAGGAGGAGCCCGACAATTTAAGCT	1			NO
mtbi3794867-4	3794867	0	C	CCA	1	Rv3379c	dxs2	NO	Coding region
mtbi0874835-4	874835	103	C	CCG	1	Rv0782	ptrBb	NO	Coding region
mtbi0071584-17	71584	71584	C	CCGAGCGCTGTTCTGGCGCTAATCTGACGCTAGAATAG	1			NO
	1188517	1907	C	CCGCCG	0	Rv1067c	PE_PGRS19	NO	Coding region
mtbi0055553-11	55553	1890	C	CCGCCGT	1	Rv0050	ponA1	YES	Coding region
mtbi4383144-6	4383144	496	C	CCGGGG	1	Rv3897c		NO	Coding region
	832266	490	C	CG	0	Rv0740		NO	Coding region
	2413520	1402	C	CG	0	Rv2154c	ftsW	NO	Coding region
	3942050	326	C	CG	0	Rv3512	PE_PGRS56	NO	Coding region
mtbi0467497-2	467497	504	C	CG	1	Rv0388c	PPE9	NO	Coding region
mtbi0467508-2	467508	493	C	CG	1	Rv0388c	PPE9	NO	Coding region
mtbi1010204-3	1010204	68	C	CG	1	Rv0907		NO	Coding region
mtbi1368322-3	1368322	399	C	CG	1	Rv1225c		NO	Coding region
mtbi2109523-2	2109523	2109523	C	CG	1			NO
mtbi2566766-3	2566766	2566766	C	CG	1			NO
mtbi3156201-2	3156201	1320	C	CG	1	Rv2848c	cobB	NO	Coding region
mtbi3194241-5	3194241	1307	C	CG	1	Rv2885c		NO	Coding region
mtbi3423249-15	3423249	3423249	C	CGCGAGCAGACGCAGAATCGCCCAAAATCCAAGATTTTGAGGCGATTCTGCGTCTGCTCGCGCAACCGG	1			NO
mtbi0194305_1	194305	511	C	CGG	905	Rv0165c	mce1R	NO	Coding region
mtbi1365837-4	1365837	1365837	C	CGG	1			NO
mtbi3779671-5	3779671	1103	C	CGGCAACGGT	1	Rv3367	PE_PGRS51	YES	Coding region
mtbi1418863-4	1418863	90	C	CGGGAGCCA	1	Rv1269c		NO	Coding region
mtbi1625332-3	1625332	33	C	CGGT	1	Rv1446c	opcA	YES	Coding region
mtbi0234496_1	234496	2266	C	CGT	2061	Rv0197		NO	Coding region
	1460909	665	C	CT	0	Rv1304	atpB	NO	Coding region
	3877301	131	C	CT	0	Rv3456c	rplQ	NO	Coding region
mtbi0336557-1	336557	336557	C	CT	1			NO
mtbi1168715-2	1168715	513	C	CT	1	Rv1046c		NO	Coding region
mtbi1634540-2	1634540	250	C	CT	1			NO	Repeat region
mtbi4197138-3	4197138	4197138	C	CT	1			NO
mtbi3247864_3	3247864	2420	C	CTAGG	2	Rv2931	ppsA	NO	Coding region
	1188516	1908	C	CTTG	0	Rv1067c	PE_PGRS19	YES	Coding region
	104288	927	GC	G	0			NO	Repeat region
	1637196	1196	GT	G	0			NO	Repeat region
	2088307	1211	GC	G	0	Rv1840c	PE_PGRS34	NO	Coding region
	2470056	407	GC	G	0	Rv2205c		NO	Coding region
	3232759	3232759	GACCCCGTGGCGATCGCAAGCGCGGCGCAGCCGCGCGCAGCGGGTCGCCACCATCAA	G	0			NO	intergenic
	3738986	3788	GC	G	0	Rv3345c	PE_PGRS50	NO	Coding region
	3739220	3554	GC	G	0	Rv3345c	PE_PGRS50	NO	Coding region
mtbi0049690-2	49690	249	GCC	G	1	Rv0045c		NO	Coding region
mtbi0162151-2	162151	380	GT	G	1	Rv0134	ephF	NO	Coding region
mtbi0336680-6	336680	2393	GGGGA	G	1	Rv0279c	PE_PGRS4	NO	Coding region
mtbi0507028-2	507028	507028	GC	G	1			NO
mtbi0854252-9	854252	854252	GC	G	1			NO
mtbi1168009-3	1168009	336	GC	G	1	Rv1045		NO	Coding region
mtbi1634536-2	1634536	254	GC	G	1			NO	Repeat region
mtbi1636981-1	1636981	1248	GGC	G	1	Rv1452c	PE_PGRS28	NO	Coding region
mtbi2009290-2	2009290	118	GC	G	1	Rv1775		NO	Coding region
mtbi2266511-1	2266511	209	GT	G	1	Rv2020c		NO	Coding region
mtbi2534562-3	2534562	990	GGA	G	1	Rv2262c		NO	Coding region
mtbi2851160-5	2851160	69	GAA	G	1	Rv2526	vapB17	NO	Coding region
mtbi3247865-1	3247865	2420	GCAAA	G	1	Rv2931	ppsA	NO	Coding region
mtbi3761016-2	3761016	6086	GC	G	1	Rv3350c	PPE56	NO	Coding region
mtbi3844756-2	3844756	1214	GC	G	1	Rv3428c		NO	Coding region
mtbi3846935-1	3846935	3846935	GCC	G	1			NO
mtbi3862472-3	3862472	3862472	GA	G	1			NO
mtbi4212832-3	4212832	539	GACC	G	1	Rv3766		YES	Coding region
mtbi4338595_1	4338595	4338595	GC	G	1608			NO
	2088313	1205	G	GA	0	Rv1840c	PE_PGRS34	NO	Coding region
mtbi0125830-2	125830	4711	G	GA	1	Rv0107c	ctpI	NO	Coding region
mtbi1273250_1	1273250	828	G	GA	857	Rv1145	mmpL13a	NO	Coding region
mtbi3473996-2	3473996	3473996	G	GA	1			NO
mtbi4170964_1	4170964	751	G	GA	952	Rv3725		NO	Coding region
mtbi4305063-2	4305063	622	G	GA	1	Rv3830c		NO	Coding region
mtbi0104939-2	104939	276	G	GACC	1	Rv0095c		YES	Coding region
	1669366	83	G	GC	0	Rv1479	moxR1	NO	Coding region
	2088317	1201	G	GC	0	Rv1840c	PE_PGRS34	NO	Coding region
	2803201	3035	G	GC	0	Rv2490c	PE_PGRS43	NO	Coding region
	2803213	3023	G	GC	0	Rv2490c	PE_PGRS43	NO	Coding region
	3623586	1324	G	GC	0	Rv3244c	lpqB	NO	Coding region
mtbi1753519-2	1753519	9	G	GC	1	Rv1549	fadD11.1	NO	Coding region
mtbi2266613-2	2266613	107	G	GC	1	Rv2020c		NO	Coding region
mtbi2564368-3	2564368	664	G	GC	1	Rv2293c		NO	Coding region
mtbi3380439-2	3380439	13	G	GC	1	Rv3021c	PPE47	NO	Miscellaneous feature
mtbi3590686_2	3590686	3590686	G	GC	1411			NO
mtbi4264381_1	4264381	4264381	G	GC	695			NO
mtbi0055546-26	55546	1883	G	GCCT	1	Rv0050	ponA1	YES	Coding region
mtbi2523205-3	2523205	21	G	GCGC	1			YES	Repeat region
mtbi3846840-2	3846840	3846840	G	GCT	1			NO
mtbi2372436-6	2372436	133	G	GGCCCGCCGACGATGCGGGCCGCGCAGCGGGCCGCTGAGGAGGCGGGCATCAAGCAAC	1	Rv2112c	dop	YES	Coding region
mtbi2421975_1	2421975	29	G	GGGAA	965	Rv2160c		NO	Coding region
mtbi1644248-5	1644248	12	G	GGGCGCGGTTCACGAGCGCCGCTCCTCCTCATCGCTTCGCTCTGCATCGTCGTC	1	Rv1458c		NO	Coding region
mtbi3846921-1	3846921	3846921	G	GGT	1			NO
mtbi1894300-9	1894300	1042	G	GGTCTTGCCGC	1	Rv1668c		NO	Coding region
	464810	1399	G	GT	0	Rv0386		NO	Coding region
mtbi0230576-2	230576	230576	G	GT	1			NO
mtbi1636979-2	1636979	1250	G	GTT	1	Rv1452c	PE_PGRS28	NO	Coding region
	328589	1119	TG	T	0	Rv0272c		NO	Coding region
	837866	2165	TG	T	0	Rv0746	PE_PGRS9	NO	Coding region
	2074435	492	TAGCGCGGCGACGATGCGCGCCGGGACGGCGGGCTGAGGAGGCGCGCGATAAGGCCG	T	0	Rv1829		NO	Coding region
	2361841	1601	TC	T	0	Rv2101	helZ	NO	Coding region
	2461325	1647	TAGCCCGGCGACGACCCGGGTCGGCACGACCCGGGAAGGAACCGGGCAAATCAAGCAC	T	0	Rv2196	qcrB	YES	Coding region
	3336620	3336620	TA	T	0			NO	intergenic
	3378652	3378652	TG	T	0			NO	intergenic
mtbi0099162-2	99162	682	TCGGTGTGCG	T	1	Rv0090		YES	Coding region
mtbi0373282-3	373282	2429	TA	T	1	Rv0305c	PPE6	NO	Coding region
mtbi0427310-2	427310	7369	TTGCCGAGGTTTGCAC	T	1	Rv0355c	PPE8	YES	Coding region
mtbi1955921-1	1955921	1324	TCGATGACCGTTG	T	1	Rv1730c		YES	Coding region
mtbi2357268-4	2357268	765	TGCC	T	1	Rv2098c	PE_PGRS36	YES	Miscellaneous feature
mtbi2368564-2	2368564	2368564	TA	T	1			NO
mtbi2734481_1	2734481	106	TA	T	633	Rv2437		NO	Coding region
mtbi2867880_1	2867880	98	TA	T	682	Rv2545	vapB18	NO	Coding region
mtbi3190145-3	3190145	533	TC	T	1	Rv2880c		NO	Coding region
mtbi3842463-2	3842463	224	TA	T	1	Rv3425	PPE57	NO	Coding region
mtbi3846932-1	3846932	3846932	TC	T	1			NO
[truncated: 21 more rows]

## Sheet: 1524_snp
Supplementary Material
[truncated: 1,601 more rows]

[truncated: 9 more sheets: 1524_indel, 1525_snp, 1525_indel, 1577_snp, 1577_indel, 1585_snp, 1585_indel, 1713_snp, 1713_indel]
